# Supplementary material for: Long-Read cDNA Sequencing Revealed Novel Expressed Genes and Dynamic Transcriptome Landscape of Triticale (x Triticosecale Wittmack) Seed at Different Developing Stages
Source: MDPI journal article supplement (doi:10.3390/agronomy13020292), 2023-01-18
Supplement: s1 [file s1]

Archive with 2 entries (2 files):
- Supplementary Figures.pdf
- Supplementary tables.xlsx
