# Supplementary material for: Long-Read cDNA Sequencing Revealed Novel Expressed Genes and Dynamic Transcriptome Landscape of Triticale (x Triticosecale Wittmack) Seed at Different Developing Stages
Source: MDPI journal article supplement (doi:10.3390/agronomy13020292), 2023-01-18
Supplement: s1 [file s1 › Supplementary Figures.pdf]

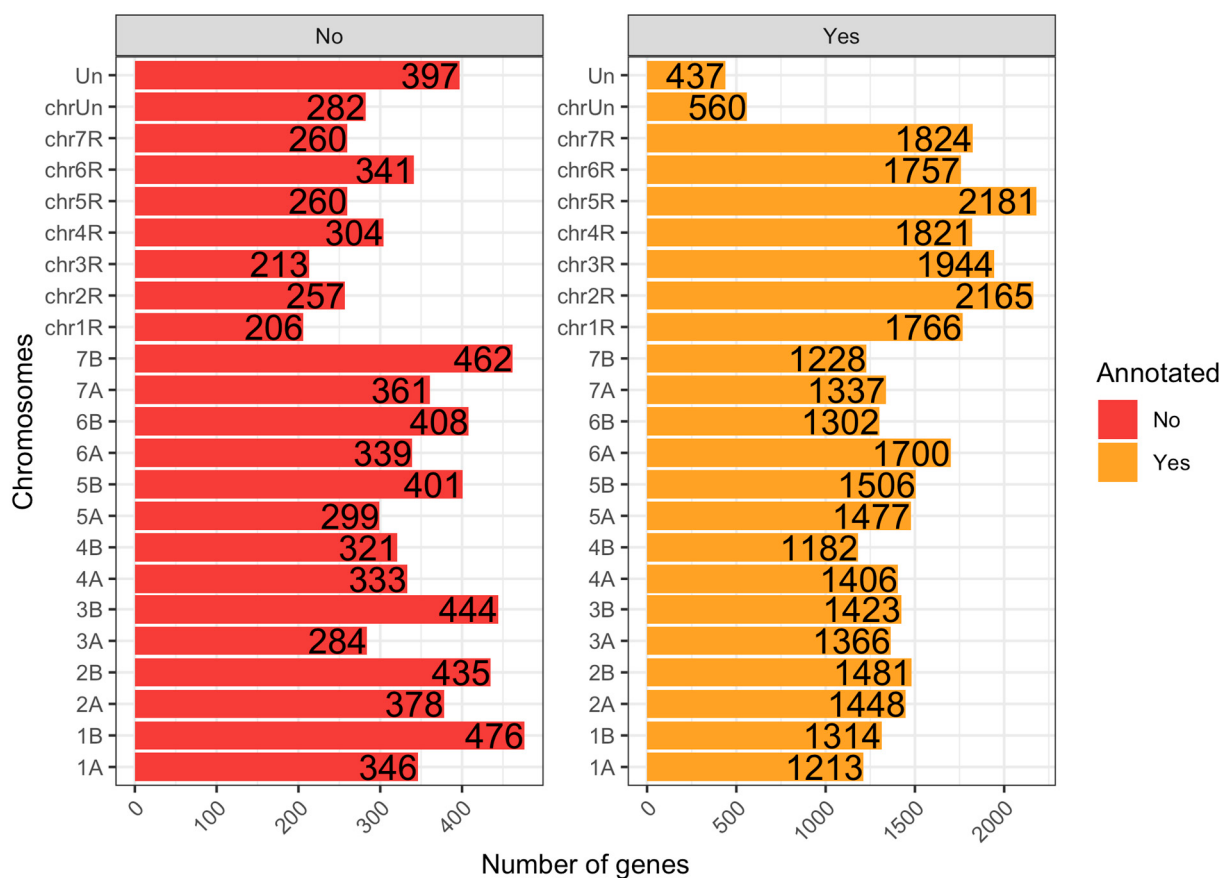

**Supplementary Figure S1.** Number of previously unannotated genes for each A, B and R chromosomes.

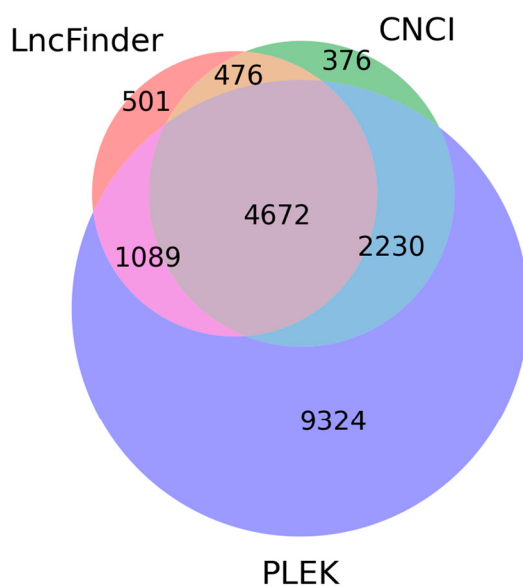

**Supplementary Figure S2.** Number of lncRNAs identified by three tools.

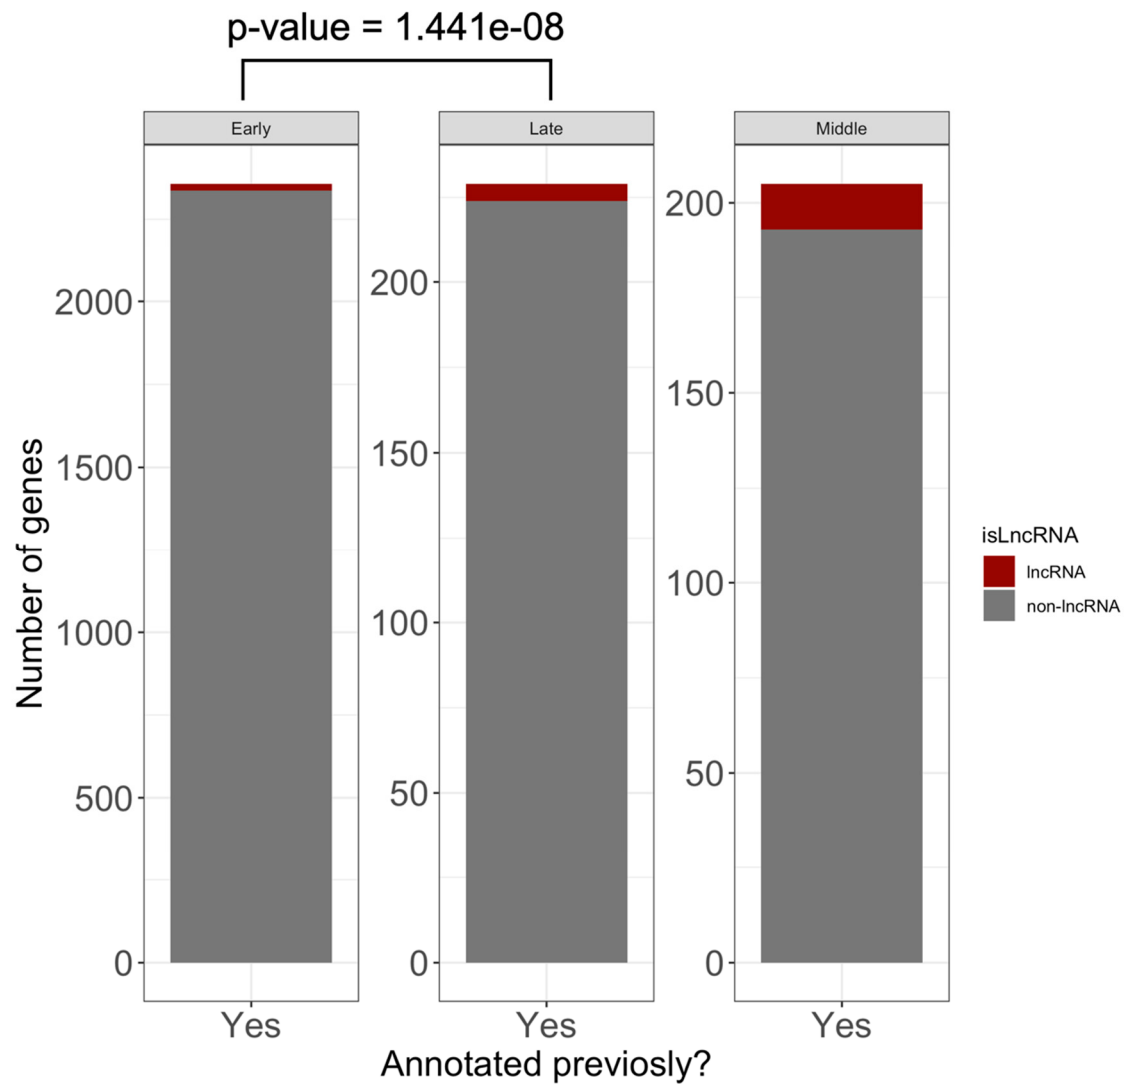

**Supplementary Figure S3.** Bar plot showing the fractions of lncRNAs among reference transcripts expressed during early, middle and late stages of triticales seed development.

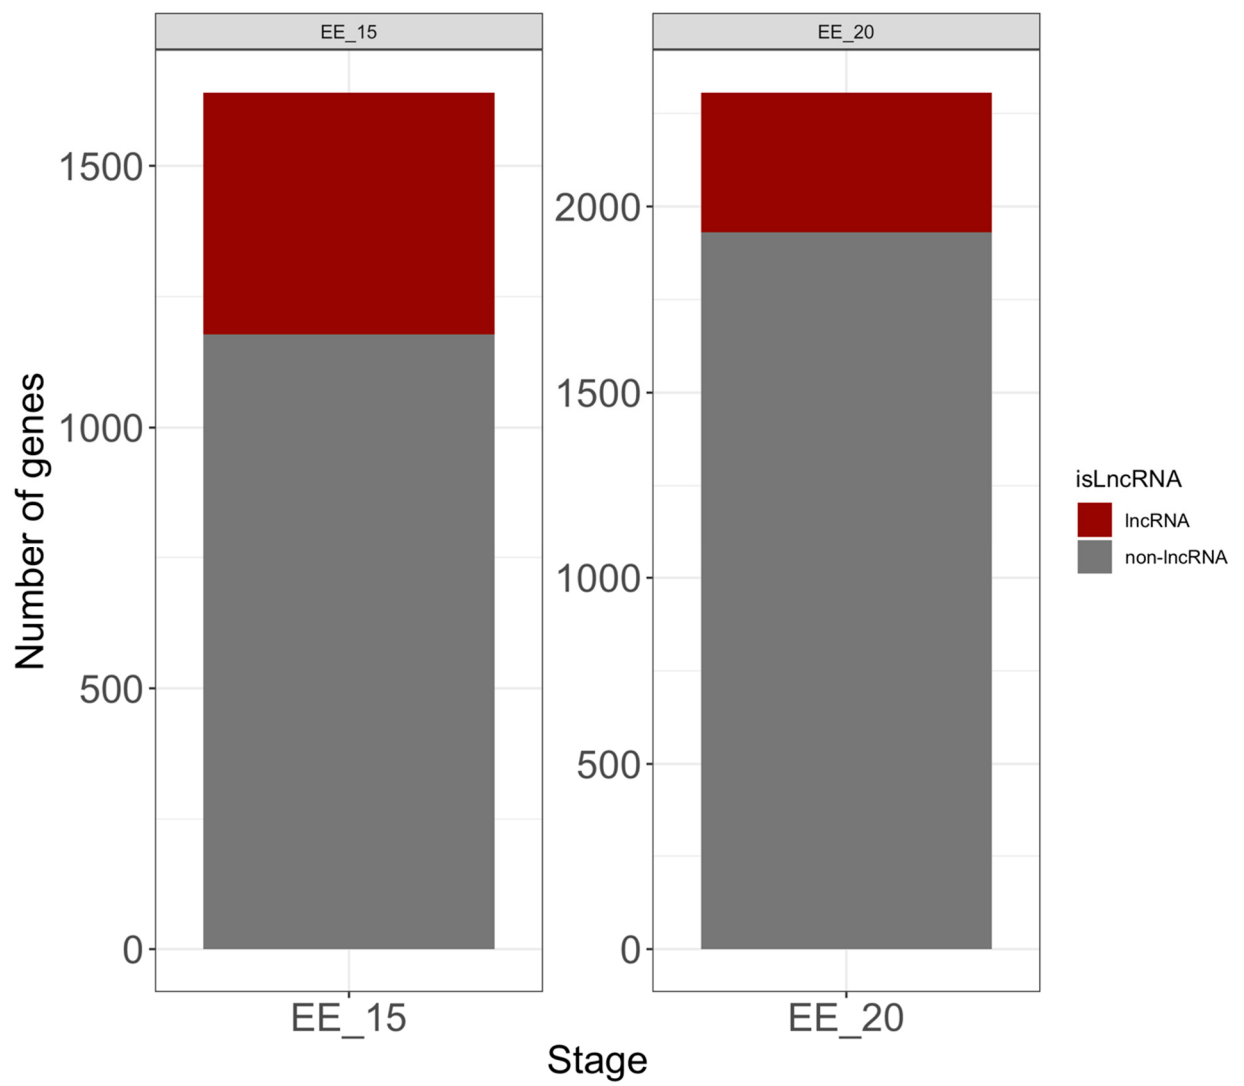

**Supplementary Figure S4.** Bar plot showing the fractions of lncRNAs among the transcripts expressed specifically in EE samples (Germ + Endosperm).
