# Supplementary material for: Long-Read cDNA Sequencing Revealed Novel Expressed Genes and Dynamic Transcriptome Landscape of Triticale (x Triticosecale Wittmack) Seed at Different Developing Stages
Source: MDPI journal article supplement (doi:10.3390/agronomy13020292), 2023-01-18
Supplement: s1 [file s1 › Supplementary tables.xlsx]

## Sheet: Table S1
Supplementary table S1. The classification and characterization of the genes expressed at different stages of seed development.
Gene	Transcript	Length	#TE	Order	Superfamily	Clade	Complete	Strand	Domains	gene	transcript	lncRNAs	n.Transcript	Gene ID	Reference	Start	End	DirectRNA	barcode5	barcode6	barcode7	barcode8	cDNA_degradated_10dpa	cDNA_degradated_20dpa	Annotated	ref_transcript_wheat	genome
Triticale.1	Triticale.1.1	1811.0											1.0	Triticale.1	1A	66065.0	67875.0	0.0	0.0	0.0728419999999999	0.017889	0.0	0.0	9.783534	Yes	ENSRNA050013832-T1	A
Triticale.42	Triticale.42.1	2045.0									Triticale.42.1	Triticale.42.1	1.0	Triticale.42	1A	239322.0	343697.0	0.0	14.460078	7.836964999999998	0.0	0.0	0.0	0.0	Yes		A
Triticale.43	Triticale.43.1	3403.0											4.0	Triticale.43	1A	247708.0	329188.0	0.0	44.229399	39.044595	0.0	0.0	0.0	55.374895	Yes		A
Triticale.44	Triticale.44.2	235.0											5.0	Triticale.44	1A	252210.0	346849.0	0.0	58.058744	38.516199	4.439785	0.0	50.450513	27.64735	Yes		A
Triticale.44	Triticale.44.1	625.0									Triticale.44.1	Triticale.44.1	5.0	Triticale.44	1A	252210.0	346849.0	0.0	58.058744	38.516199	4.439785	0.0	50.450513	27.64735	Yes		A
Triticale.43	Triticale.43.3	1747.0											4.0	Triticale.43	1A	247708.0	329188.0	0.0	44.229399	39.044595	0.0	0.0	0.0	55.374895	Yes		A
Triticale.43	Triticale.43.2	2570.0											4.0	Triticale.43	1A	247708.0	329188.0	0.0	44.229399	39.044595	0.0	0.0	0.0	55.374895	Yes		A
Triticale.45	Triticale.45.1	2292.0											1.0	Triticale.45	1A	260745.0	338522.0	0.0	11.749679	0.0	0.0	0.0	0.0	0.0	Yes		A
Triticale.44	Triticale.44.3	1226.0									Triticale.44.3	Triticale.44.3	5.0	Triticale.44	1A	252210.0	346849.0	0.0	58.058744	38.516199	4.439785	0.0	50.450513	27.64735	Yes		A
Triticale.44	Triticale.44.4	1561.0									Triticale.44.4	Triticale.44.4	5.0	Triticale.44	1A	252210.0	346849.0	0.0	58.058744	38.516199	4.439785	0.0	50.450513	27.64735	Yes		A
Triticale.44	Triticale.44.5	706.0									Triticale.44.5	Triticale.44.5	5.0	Triticale.44	1A	252210.0	346849.0	0.0	58.058744	38.516199	4.439785	0.0	50.450513	27.64735	Yes		A
Triticale.46	Triticale.46.1	310.0									Triticale.46.1	Triticale.46.1	1.0	Triticale.46	1A	264814.0	266603.0	0.0	22.604232	15.280503	0.0	0.0	50.493509	0.0	Yes		A
Triticale.43	Triticale.43.4	773.0									Triticale.43.4	Triticale.43.4	4.0	Triticale.43	1A	247708.0	329188.0	0.0	44.229399	39.044595	0.0	0.0	0.0	55.374895	Yes		A
Triticale.47	Triticale.47.1	1899.0											1.0	Triticale.47	1A	281707.0	283605.0	0.0	33.41031	22.402943	2.917343	1.563507	0.0	21.686104	Yes	ENSRNA050013845-T1	A
Triticale.3	Triticale.3.1	233.0									Triticale.3.1	Triticale.3.1	1.0	Triticale.3	1A	710054.0	710286.0	3.927734	16.949672	21.864124	64.312735	108.92911399999998	10.763677	0.0	No		A
Triticale.16	Triticale.16.1	892.0											1.0	Triticale.16	1A	1144333.0	1145934.0	15.156943	1.072727	2.722345	0.0	1.368576	0.0	0.0	Yes	TraesCS1A02G001800.1	A
Triticale.21	Triticale.21.1	2004.0											2.0	Triticale.21	1A	1159190.0	1162830.0	12.834083	8.667387	7.836735000000001	2.536044	0.0	0.0	0.0	Yes	TraesCS1A02G001900.9	A
Triticale.21	Triticale.21.2	1349.0											2.0	Triticale.21	1A	1159190.0	1162830.0	12.834083	8.667387	7.836735000000001	2.536044	0.0	0.0	0.0	Yes		A
Triticale.8	Triticale.8.1	1486.0											1.0	Triticale.8	1A	1163738.0	1167860.0	8.074977	0.0	0.0	0.0	0.0	0.0	0.0	Yes	TraesCS1A02G002000.1	A
Triticale.26	Triticale.26.1	880.0											1.0	Triticale.26	1A	1188912.0	1190867.0	45.377315	1.221252	0.941648	1.154853	1.818959	4.405926999999998	3.495582	Yes		A
Triticale.7	Triticale.7.1	903.0											1.0	Triticale.7	1A	1193607.0	1194509.0	8.348901	0.0	0.0	0.0	0.0	0.0	0.0	No		A
Triticale.49	Triticale.49.1	4359.0											1.0	Triticale.49	1A	1336866.0	1347647.0	4.984266000000001	4.753893	1.426192	9.460674	5.076554	3.95137	5.512387	Yes		A
Triticale.12	Triticale.12.1	1043.0											1.0	Triticale.12	1A	2549257.0	2569861.0	0.917029	11.724821	2.184658	0.0	0.0	0.0	0.0	Yes		A
Triticale.67	Triticale.67.1	1402.0											3.0	Triticale.67	1A	2632034.0	2667206.0	2.542665	33.532577	34.139592	8.921217	7.2180399999999985	13.176831	6.840914	Yes		A
Triticale.68	Triticale.68.2	1214.0											3.0	Triticale.68	1A	2642136.0	2659143.0	1.149044	59.605569	75.24552299999998	14.980851	11.725966	7.414572	7.386974	Yes	TraesCS1A02G004400.1	A
Triticale.68	Triticale.68.2	1214.0											3.0	Triticale.68	1A	2642136.0	2659143.0	1.149044	59.605569	75.24552299999998	14.980851	11.725966	7.414572	7.386974	No	TraesCS1A02G004400.1	A
Triticale.68	Triticale.68.3	1034.0											3.0	Triticale.68	1A	2642136.0	2659143.0	1.149044	59.605569	75.24552299999998	14.980851	11.725966	7.414572	7.386974	Yes		A
Triticale.68	Triticale.68.3	1034.0											3.0	Triticale.68	1A	2642136.0	2659143.0	1.149044	59.605569	75.24552299999998	14.980851	11.725966	7.414572	7.386974	No		A
Triticale.68	Triticale.68.4	1236.0											3.0	Triticale.68	1A	2642136.0	2659143.0	1.149044	59.605569	75.24552299999998	14.980851	11.725966	7.414572	7.386974	Yes		A
Triticale.68	Triticale.68.4	1236.0											3.0	Triticale.68	1A	2642136.0	2659143.0	1.149044	59.605569	75.24552299999998	14.980851	11.725966	7.414572	7.386974	No		A
Triticale.67	Triticale.67.2	1422.0											3.0	Triticale.67	1A	2632034.0	2667206.0	2.542665	33.532577	34.139592	8.921217	7.2180399999999985	13.176831	6.840914	Yes	TraesCS1A02G004500.1	A
Triticale.67	Triticale.67.3	1368.0											3.0	Triticale.67	1A	2632034.0	2667206.0	2.542665	33.532577	34.139592	8.921217	7.2180399999999985	13.176831	6.840914	Yes		A
Triticale.36	Triticale.36.1	1254.0											1.0	Triticale.36	1A	2836805.0	2843886.0	1.512733	156.528685	197.346591	36.244656	92.458136	217.098005	138.918628	Yes	TraesCS1A02G004600.1	A
Triticale.17	Triticale.17.1	2184.0											1.0	Triticale.17	1A	2943345.0	2945528.0	0.722881	4.147736	2.572791	8.801358	0.0	0.0	0.0	Yes		A
Triticale.9	Triticale.9.1	1347.0									Triticale.9.1	Triticale.9.1	1.0	Triticale.9	1A	3019678.0	3095340.0	0.0	22.192812	13.485236	0.0	0.0	0.0	0.0	Yes		A
Triticale.10	Triticale.10.1	555.0											1.0	Triticale.10	1A	3019699.0	3074752.0	0.0	13.302651999999998	9.184508	0.0	0.671555	0.0	0.0	Yes		A
Triticale.11	Triticale.11.1	682.0											1.0	Triticale.11	1A	3075379.0	3095340.0	0.0	4.716153	5.840154	0.0	6.528957	0.0	0.0	Yes		A
Triticale.18	Triticale.18.1	3458.0											1.0	Triticale.18	1A	3386064.0	3392121.0	5.313914	5.802963	3.237344	13.693477	9.397929	0.0	5.035268	Yes		A
Triticale.13	Triticale.13.1	1331.0											1.0	Triticale.13	1A	3446931.0	3450200.0	9.580209	4.09186	4.058713	1.93575	5.006625	0.0	1.288363	Yes	TraesCS1A02G005900.1	A
Triticale.14	Triticale.14.1	1113.0											1.0	Triticale.14	1A	3776267.0	3796086.0	0.0	2437.15589	2115.088092	692.934674	1250.8574210000004	967.07263	599.0813469999998	Yes		A
Triticale.19	Triticale.19.1	1260.0											1.0	Triticale.19	1A	3845606.0	3847267.0	0.0	69.10358199999999	61.164618	37.696016	56.69867900000001	143.928407	32.861402000000005	Yes		A
Triticale.20	Triticale.20.1	1368.0											1.0	Triticale.20	1A	3845783.0	3847150.0	0.0	1.328511	3.014062	0.0	0.504021	0.0	7.562186	Yes	TraesCS1A02G007300.1	A
Triticale.64	Triticale.64.1	1197.0									Triticale.64.1	Triticale.64.1	3.0	Triticale.64	1A	3910314.0	3911594.0	0.0	30.997102	29.259943	20.780456	54.648339	106.058268	124.705904	Yes		A
Triticale.64	Triticale.64.2	957.0									Triticale.64.2	Triticale.64.2	3.0	Triticale.64	1A	3910314.0	3911594.0	0.0	30.997102	29.259943	20.780456	54.648339	106.058268	124.705904	Yes		A
Triticale.64	Triticale.64.3	630.0											3.0	Triticale.64	1A	3910314.0	3911594.0	0.0	30.997102	29.259943	20.780456	54.648339	106.058268	124.705904	Yes		A
Triticale.66	Triticale.66.1	1310.0											2.0	Triticale.66	1A	4033125.0	4042374.0	0.0	39.220949	65.95825	7.6992850000000015	15.334381	377.101554	188.730704	Yes		A
Triticale.66	Triticale.66.2	2284.0											2.0	Triticale.66	1A	4033125.0	4042374.0	0.0	39.220949	65.95825	7.6992850000000015	15.334381	377.101554	188.730704	Yes		A
Triticale.27	Triticale.27.1	674.0											1.0	Triticale.27	1A	4044730.0	4045403.0	0.0	112.152163	92.488929	182.494161	588.006241	62.337025	81.50160100000002	No		A
Triticale.54	Triticale.54.1	1117.0									Triticale.54.1	Triticale.54.1	1.0	Triticale.54	1A	4052995.0	4062111.0	0.0	34.265614	67.455904	21.190204	35.430938	756.703737	814.559519	Yes		A
Triticale.53	Triticale.53.2	1246.0											2.0	Triticale.53	1A	4048024.0	4203754.0	0.036936	265.821522	259.188055	247.181165	755.620466	158.244043	92.615746	Yes		A
Triticale.53	Triticale.53.3	1113.0											2.0	Triticale.53	1A	4048024.0	4203754.0	0.036936	265.821522	259.188055	247.181165	755.620466	158.244043	92.615746	Yes		A
Triticale.56	Triticale.56.1	1208.0											1.0	Triticale.56	1A	4201991.0	4203637.0	0.0	237.601596	141.12913400000005	192.050717	457.892374	139.641751	144.548625	Yes		A
Triticale.34	Triticale.34.1	514.0									Triticale.34.1	Triticale.34.1	1.0	Triticale.34	1A	5062710.0	5063223.0	0.0	0.0	0.0	0.0	0.0	0.0	8.047974	No		A
Triticale.52	Triticale.52.1	1800.0											1.0	Triticale.52	1A	5491027.0	5495112.0	5.658882	0.983672	0.4016050000000001	1.022143	0.0	0.0	6.234888	Yes	TraesCS1A02G009000.3	A
Triticale.58	Triticale.58.1	1184.0											3.0	Triticale.58	1A	6517181.0	6518575.0	0.0	2057.8612510000007	3737.112347	12439.442574	20726.263386	3088.67375	1707.741124	Yes		A
Triticale.58	Triticale.58.2	1173.0											3.0	Triticale.58	1A	6517181.0	6518575.0	0.0	2057.8612510000007	3737.112347	12439.442574	20726.263386	3088.67375	1707.741124	Yes		A
Triticale.59	Triticale.59.1	1192.0											1.0	Triticale.59	1A	6517330.0	6562869.0	0.0	1339.027043	2184.1142600000007	5414.889203	9973.976563	1745.0048149999998	1020.106335	Yes		A
Triticale.58	Triticale.58.3	268.0									Triticale.58.3	Triticale.58.3	3.0	Triticale.58	1A	6517181.0	6518575.0	0.0	2057.8612510000007	3737.112347	12439.442574	20726.263386	3088.67375	1707.741124	Yes		A
Triticale.22	Triticale.22.1	1102.0											2.0	Triticale.22	1A	7183007.0	7184973.0	4.292816999999999	5.5241440000000015	2.602934	1.112526	2.6142220000000003	24.183692	8.327731	Yes		A
Triticale.22	Triticale.22.2	913.0											2.0	Triticale.22	1A	7183007.0	7184973.0	4.292816999999999	5.5241440000000015	2.602934	1.112526	2.6142220000000003	24.183692	8.327731	Yes		A
Triticale.23	Triticale.23.1	475.0											1.0	Triticale.23	1A	7330359.0	7330944.0	18.458359	0.0	0.0	0.0	0.0	0.0	0.0	No		A
Triticale.57	Triticale.57.1	716.0											1.0	Triticale.57	1A	7697038.0	7697854.0	0.0	7.958842999999999	10.461524	34.772219	7.519037	0.0	21.886536	Yes		A
Triticale.24	Triticale.24.1	677.0											1.0	Triticale.24	1A	7962375.0	7963154.0	34.752795	0.0	3.3545300000000005	8.510644000000001	0.0	13.817307	11.519121	Yes	TraesCS1A02G014800.1	A
Triticale.48	Triticale.48.1	598.0									Triticale.48.1	Triticale.48.1	1.0	Triticale.48	1A	8009829.0	8010717.0	1.717155	0.671786	1.7501939999999998	6.726507000000002	2.411767	0.0	0.0	No		A
Triticale.28	Triticale.28.1	1122.0											1.0	Triticale.28	1A	8247217.0	8251270.0	16.285441	58.9332	68.104137	44.031496	40.602133	130.812818	37.771515	Yes	TraesCS1A02G015300.1	A
Triticale.31	Triticale.31.1	1025.0											1.0	Triticale.31	1A	8264166.0	8266341.0	6.330471	0.0	0.0	0.0	0.0	0.0	0.0	Yes	TraesCS1A02G015400.1	A
Triticale.29	Triticale.29.1	1611.0											1.0	Triticale.29	1A	8629484.0	8631422.0	0.938628	1.506994	0.0	1.705151	0.0	0.0	8.260057000000002	Yes		A
Triticale.51	Triticale.51.1	2005.0											1.0	Triticale.51	1A	9104718.0	9111352.0	11.336095	7.681247999999999	3.488403	7.716978	2.776702	0.0	1.521061	Yes		A
Triticale.30	Triticale.30.1	335.0									Triticale.30.1	Triticale.30.1	1.0	Triticale.30	1A	9122433.0	9123117.0	6.068859	0.0	0.345125	1.705151	3.60109	14.413432	0.0	Yes		A
Triticale.38	Triticale.38.1	1617.0											1.0	Triticale.38	1A	9369884.0	9375647.0	6.264484	0.39369	0.0	0.0	0.0	0.0	0.0	Yes		A
Triticale.37	Triticale.37.1	2923.0											1.0	Triticale.37	1A	9544059.0	9547987.0	4.387755	0.5854600000000001	0.992355	7.660053	0.0	0.0	0.0	Yes	TraesCS1A02G018400.1	A
Triticale.32	Triticale.32.1	595.0									Triticale.32.1	Triticale.32.1	1.0	Triticale.32	1A	9579527.0	9580121.0	5.215299	2.5584830000000003	3.37724	1.613445	0.0	0.0	8.158392	Yes		A
Triticale.33	Triticale.33.1	1218.0											1.0	Triticale.33	1A	9586486.0	9589430.0	69.16252800000001	19.325996	24.615058	19.288645	21.846023	15.513969	7.758572	Yes	TraesCS1A02G019000.1	A
Triticale.35	Triticale.35.1	931.0											1.0	Triticale.35	1A	9979648.0	9981184.0	0.0	0.0	0.0	51.967725	0.0	0.0	86.04247	Yes	TraesCS1A02G020000.1	A
Triticale.41	Triticale.41.1	762.0											1.0	Triticale.41	1A	9984176.0	9985498.0	0.0	0.0	0.0	18.156947	0.0	0.0	23.044215	Yes	TraesCS1A02G020100.2	A
Triticale.39	Triticale.39.1	777.0											1.0	Triticale.39	1A	10048788.0	10050329.0	5.334594999999998	0.0	2.589102	6.386087	0.0	0.0	0.0	Yes		A
Triticale.40	Triticale.40.1	1009.0											1.0	Triticale.40	1A	10051858.0	10053292.0	1.280961	3.102866	3.220417	1.705151	0.0	14.413432	0.0	Yes		A
Triticale.50	Triticale.50.1	1823.0											1.0	Triticale.50	1A	10065896.0	10069235.0	23.098582	4.691466	12.794232	12.971494	2.349697	43.169136	19.441164	Yes		A
Triticale.60	Triticale.60.1	1283.0											2.0	Triticale.60	1A	10645996.0	10647442.0	0.0	7.182749	12.112233	279.982165	57.109304	0.0	39.211621	No		A
Triticale.60	Triticale.60.2	1358.0											2.0	Triticale.60	1A	10645996.0	10647442.0	0.0	7.182749	12.112233	279.982165	57.109304	0.0	39.211621	No		A
Triticale.61	Triticale.61.1	761.0									Triticale.61.1	Triticale.61.1	1.0	Triticale.61	1A	11143874.0	11240369.0	0.0	0.0	7.849417999999999	0.598259	0.0	0.0	0.0	Yes		A
Triticale.62	Triticale.62.1	579.0											1.0	Triticale.62	1A	11293222.0	11293800.0	4.44997	10.71341	27.779586	15.584902	12.504304	26.536641	7.773277	No		A
Triticale.63	Triticale.63.1	477.0									Triticale.63.1	Triticale.63.1	1.0	Triticale.63	1A	11438681.0	11439723.0	2.794237	0.790804	0.0	1.705151	10.376727	0.0	0.0	No		A
Triticale.69	Triticale.69.1	1719.0											1.0	Triticale.69	1A	11532448.0	11536512.0	2.1442650000000003	13.788691	11.696305	2.948056	1.768074	13.759422	9.079374	No		A
Triticale.71	Triticale.71.1	899.0											1.0	Triticale.71	1A	11664025.0	11665444.0	4.388267	3.629428	1.053304	1.595141	0.0	0.0	8.850649	Yes		A
Triticale.70	Triticale.70.1	1480.0											1.0	Triticale.70	1A	11894087.0	11895935.0	1.674943	7.133798	12.304966	7.879410000000001	0.0	3.51571	0.0	Yes		A
Triticale.73	Triticale.73.1	3478.0											1.0	Triticale.73	1A	11933791.0	11942590.0	2.143892	3.251208	1.681734	0.8280620000000001	12.365676	8.806362	1.567129	No		A
Triticale.72	Triticale.72.1	803.0											1.0	Triticale.72	1A	12088873.0	12093700.0	6.564549	0.0	1.471439	3.459143	0.804975	0.0	2.713737	Yes		A
Triticale.74	Triticale.74.1	1432.0											1.0	Triticale.74	1A	12141981.0	12144556.0	11.875082	1.982531	1.738117	0.8799620000000001	0.0	0.0	5.1252830000000005	Yes	TraesCS1A02G025100.2	A
Triticale.75	Triticale.75.1	775.0											1.0	Triticale.75	1A	12181958.0	12183056.0	5.428296	2.269351	0.6295029999999999	2.882256	9.160709	0.0	18.831461	No		A
Triticale.76	Triticale.76.1	1131.0											1.0	Triticale.76	1A	12312916.0	12314564.0	0.0	2.410168	1.12917	5.16822	0.0	0.0	13.529104	Yes		A
Triticale.77	Triticale.77.1	1520.0											1.0	Triticale.77	1A	12368045.0	12369837.0	0.0	2.231939	1.112774	3.0131810000000003	0.997407	0.0	6.512124	Yes		A
Triticale.78	Triticale.78.1	669.0											1.0	Triticale.78	1A	12915093.0	12916880.0	7.712461	3.036734	1.348565	1.582808	0.0	0.0	0.0	Yes		A
Triticale.79	Triticale.79.1	2545.0											1.0	Triticale.79	1A	13083151.0	13086605.0	1.828941	1.903522	1.392064	0.0	8.100685	0.0	0.0	Yes		A
Triticale.80	Triticale.80.1	536.0											1.0	Triticale.80	1A	13212393.0	13213460.0	1.421951	0.489826	0.0	0.0	0.0	14.413432	0.0	Yes		A
Triticale.81	Triticale.81.1	1474.0											1.0	Triticale.81	1A	13250288.0	13257351.0	1.441692	5.900448	6.423898	3.788581	0.0	6.541780999999999	2.784937	Yes		A
Triticale.82	Triticale.82.1	638.0											2.0	Triticale.82	1A	13622515.0	13623760.0	28.65258900000001	7.193929	3.851912	8.217585	0.0	8.268525	28.056584	No		A
Triticale.82	Triticale.82.2	646.0											2.0	Triticale.82	1A	13622515.0	13623760.0	28.65258900000001	7.193929	3.851912	8.217585	0.0	8.268525	28.056584	No		A
Triticale.84	Triticale.84.1	2330.0											1.0	Triticale.84	1A	13669915.0	13674420.0	1.480453	0.0	1.837114	13.828554	0.0	0.0	3.451139	Yes		A
Triticale.83	Triticale.83.1	408.0											1.0	Triticale.83	1A	13743708.0	13744366.0	7.076517	0.0	0.0	0.0	0.0	0.0	0.0	No		A
Triticale.85	Triticale.85.1	1300.0											1.0	Triticale.85	1A	13903441.0	13916324.0	2.821659	12.248941	3.802961	0.960131	1.120494	0.0	0.0	No		A
Triticale.87	Triticale.87.1	1451.0											1.0	Triticale.87	1A	13971918.0	13974863.0	10.117902	1.210458	2.479247	1.504199	0.0	0.0	6.658162	Yes		A
Triticale.90	Triticale.90.1	1481.0											1.0	Triticale.90	1A	14045688.0	14056298.0	6.805526	1.525007	0.213724	0.0	0.0	0.0	0.0	Yes		A
Triticale.86	Triticale.86.1	1198.0											1.0	Triticale.86	1A	14068380.0	14083134.0	0.0	0.0	0.023731	0.0	49.496956	0.0	0.0	Yes		A
Triticale.89	Triticale.89.1	737.0											1.0	Triticale.89	1A	14143597.0	14145914.0	16.086576	0.222111	1.351182	0.0	0.0	0.0	0.0	Yes	TraesCS1A02G030600.1	A
Triticale.88	Triticale.88.1	311.0											1.0	Triticale.88	1A	14524288.0	14524598.0	25.859041	0.0	0.0	0.0	0.0	0.0	0.0	Yes		A
Triticale.91	Triticale.91.1	245.0											1.0	Triticale.91	1A	14909735.0	14910074.0	15.546739	0.0	0.0	0.0	0.0	0.0	0.0	No		A
Triticale.92	Triticale.92.1	664.0											1.0	Triticale.92	1A	15182842.0	15183505.0	0.0	0.0	0.0	0.0	8.745118	0.0	0.0	No		A
Triticale.93	Triticale.93.1	1015.0											1.0	Triticale.93	1A	15374529.0	15375823.0	1.610925	5.605747	10.336886	11.633665	4.182942	11.615943	12.772407	No		A
Triticale.96	Triticale.96.1	1554.0											1.0	Triticale.96	1A	15429704.0	15437477.0	2.707765	10.529292	5.244553	5.003532	0.0	0.0	6.233833	Yes		A
Triticale.94	Triticale.94.1	1588.0											1.0	Triticale.94	1A	15438125.0	15441465.0	16.849195	0.824667	0.0	3.815115	6.981081	0.0	0.0	Yes	TraesCS1A02G033100.1	A
Triticale.95	Triticale.95.1	569.0											2.0	Triticale.95	1A	16029095.0	16037832.0	29.985667	0.790804	0.0	0.0	0.0	0.0	0.0	No		A
Triticale.95	Triticale.95.2	557.0											2.0	Triticale.95	1A	16029095.0	16037832.0	29.985667	0.790804	0.0	0.0	0.0	0.0	0.0	No		A
Triticale.97	Triticale.97.1	630.0											1.0	Triticale.97	1A	16192487.0	16193347.0	9.623169	0.0	0.0	0.0	0.0	12.40012	0.0	No		A
Triticale.99	Triticale.99.1	1071.0											1.0	Triticale.99	1A	16373846.0	16375357.0	0.0	77.213748	14.220311	0.0	1.383613	0.0	1.340024	Yes		A
Triticale.100	Triticale.100.1	1134.0											1.0	Triticale.100	1A	16407008.0	16410201.0	6.91224	23.892176	31.500367	3.246403	2.735748	12.417921	49.320379	Yes	TraesCS1A02G033600.1	A
Triticale.101	Triticale.101.1	662.0											1.0	Triticale.101	1A	16515496.0	16517066.0	4.452101	13.818756	4.8786830000000005	18.26469	29.018151	0.0	0.0	No		A
Triticale.102	Triticale.102.1	681.0											1.0	Triticale.102	1A	19895297.0	19897721.0	3.598762	0.0	2.203735	1.96806	1.35107	0.0	15.573368	Yes	TraesCS1A02G035800.1	A
Triticale.103	Triticale.103.1	1843.0											1.0	Triticale.103	1A	20091348.0	20094682.0	0.0	0.236855	0.787555	6.53009	0.0	0.0	0.0	Yes	TraesCS1A02G036100.2	A
Triticale.104	Triticale.104.1	653.0											1.0	Triticale.104	1A	20913437.0	20914089.0	1.6400830000000002	1.930384	1.210939	1.733874	0.388785	11.01424	6.124766	Yes	TraesCS1A02G037500.1	A
Triticale.105	Triticale.105.1	929.0											2.0	Triticale.105	1A	20975741.0	20978111.0	42.372979	7.288489999999999	2.862475	1.26831	2.870638	15.318898	14.773779	Yes		A
Triticale.105	Triticale.105.2	780.0											2.0	Triticale.105	1A	20975741.0	20978111.0	42.372979	7.288489999999999	2.862475	1.26831	2.870638	15.318898	14.773779	Yes		A
Triticale.106	Triticale.106.1	1747.0											1.0	Triticale.106	1A	20978434.0	20981229.0	7.806674	0.440442	3.654448	4.348282	7.675249000000001	0.0	2.55512	Yes		A
Triticale.107	Triticale.107.1	766.0											1.0	Triticale.107	1A	20998069.0	20998918.0	71.714343	0.335524	1.195609	0.0	0.0	0.0	0.0	Yes	TraesCS1A02G038100.1	A
Triticale.108	Triticale.108.1	804.0											1.0	Triticale.108	1A	21022731.0	21023627.0	43.346152	0.0	0.697793	0.0	0.0	0.0	0.0	Yes	TraesCS1A02G038200.1	A
Triticale.110	Triticale.110.1	1145.0											1.0	Triticale.110	1A	21024149.0	21027013.0	6.337581	51.641211	11.98263	12.096892	0.0	30.173799	9.105734	Yes		A
Triticale.109	Triticale.109.1	2170.0											1.0	Triticale.109	1A	21281533.0	21284902.0	1.462442	5.338836	1.996326	2.803677	18.43443	0.0	0.0	Yes		A
Triticale.111	Triticale.111.1	1163.0											1.0	Triticale.111	1A	21329028.0	21335270.0	4.267003	6.719450999999999	6.056668	0.0	0.0	0.0	13.769321	Yes		A
Triticale.112	Triticale.112.1	1547.0											1.0	Triticale.112	1A	21618184.0	21626991.0	10.92315	2.055476	1.948775	3.292363	1.958835	8.823225	1.790619	Yes	TraesCS1A02G039400.2	A
Triticale.113	Triticale.113.1	3048.0											1.0	Triticale.113	1A	21774240.0	21832667.0	2.364122	0.0	0.0	3.152962	8.120764999999999	0.0	0.0	Yes		A
Triticale.114	Triticale.114.1	1727.0											1.0	Triticale.114	1A	21985330.0	21987056.0	7.730227	0.19232	0.0	0.36828	0.0	0.0	0.0	Yes	TraesCS1A02G039800.1	A
Triticale.115	Triticale.115.1	817.0											1.0	Triticale.115	1A	22291726.0	22293776.0	14.312636	0.294253	0.243589	4.136609	0.819831	9.050295	5.444264	Yes	TraesCS1A02G040500.1	A
Triticale.120	Triticale.120.1	2169.0											1.0	Triticale.120	1A	22294835.0	22301515.0	9.671456	7.21932	11.693191	9.633434	13.169133	0.0	11.822527	Yes	TraesCS1A02G040600.1	A
Triticale.118	Triticale.118.1	675.0											2.0	Triticale.118	1A	22626969.0	22644130.0	0.0	284.120948	272.859336	310.914228	568.344648	213.026326	82.099796	Yes		A
Triticale.118	Triticale.118.2	660.0											2.0	Triticale.118	1A	22626969.0	22644130.0	0.0	284.120948	272.859336	310.914228	568.344648	213.026326	82.099796	Yes		A
Triticale.119	Triticale.119.1	275.0									Triticale.119.1	Triticale.119.1	1.0	Triticale.119	1A	22627423.0	22644117.0	0.0	30.714035	29.334863	36.049417	64.062005	116.776946	58.372057	Yes		A
Triticale.116	Triticale.116.1	607.0									Triticale.116.1	Triticale.116.1	1.0	Triticale.116	1A	22854443.0	22855423.0	0.0	0.0	1.240881	0.0	5.294849	0.0	0.0	No		A
Triticale.117	Triticale.117.1	902.0									Triticale.117.1	Triticale.117.1	1.0	Triticale.117	1A	22893832.0	22894813.0	8.041813000000001	0.651405	0.0	0.0	3.030186	0.0	0.0	No		A
Triticale.121	Triticale.121.1	1508.0											1.0	Triticale.121	1A	24943572.0	24947004.0	13.833555	12.59937	9.704028	8.292823	12.577548	9.701349	29.621734000000004	Yes		A
Triticale.123	Triticale.123.1	1620.0											1.0	Triticale.123	1A	25543116.0	25545206.0	4.617237	1.868152	2.625187	5.009144	5.990704	13.906295000000002	8.530101	Yes		A
Triticale.124	Triticale.124.1	655.0											1.0	Triticale.124	1A	25545346.0	25546110.0	9.046651	0.0	0.0	0.0	0.0	0.0	0.0	Yes	TraesCS1A02G044600.1	A
Triticale.125	Triticale.125.1	1011.0											1.0	Triticale.125	1A	25703541.0	25708930.0	0.938628	1.581607	0.916746	0.0	0.0	14.413432	4.096869	Yes		A
Triticale.122	Triticale.122.1	1035.0									Triticale.122.1	Triticale.122.1	1.0	Triticale.122	1A	25936786.0	25937820.0	5.819491999999999	4707-10-01	10.09209	22.916569	6.995161	26.153071	37.795997	No		A
Triticale.128	Triticale.128.1	2044.0											1.0	Triticale.128	1A	26965589.0	26971294.0	11.190058	3.102473	5.3958330000000005	1.508274	0.0	21.486175	3.113152	Yes		A
Triticale.126	Triticale.126.1	644.0									Triticale.126.1	Triticale.126.1	1.0	Triticale.126	1A	27054182.0	27055164.0	0.0	0.0	12.257427	3.100515	0.0	12.869133	4.751991	Yes		A
Triticale.127	Triticale.127.1	614.0											2.0	Triticale.127	1A	27136349.0	27138737.0	0.0	0.0	11.930862	0.0	0.0	14.413432	0.0	Yes		A
Triticale.127	Triticale.127.2	621.0											2.0	Triticale.127	1A	27136349.0	27138737.0	0.0	0.0	11.930862	0.0	0.0	14.413432	0.0	Yes	TraesCS1A02G045600.1	A
Triticale.129	Triticale.129.1	1665.0											1.0	Triticale.129	1A	27249156.0	27256345.0	81.576607	240.290806	273.326674	82.170865	29.238041	41.067456	32.174643	Yes		A
Triticale.130	Triticale.130.1	1630.0											1.0	Triticale.130	1A	27258231.0	27261032.0	21.812439	10.09997	6.393749	5.316304	0.792018	18.569458	12.375145	Yes	TraesCS1A02G045800.1	A
Triticale.131	Triticale.131.1	1169.0											1.0	Triticale.131	1A	27275696.0	27277473.0	9.644821	7.464266999999999	7.173172999999999	5.083362	17.554159	0.0	3.245251	No		A
Triticale.132	Triticale.132.1	929.0									Triticale.132.1	Triticale.132.1	1.0	Triticale.132	1A	27392454.0	27393459.0	0.0	0.0	1.515062	3.309352	17.999638	0.0	0.0	No		A
Triticale.134	Triticale.134.1	1254.0											1.0	Triticale.134	1A	27395872.0	27399520.0	0.0	7.846866	8.980124	6.997373	1.674192	0.0	12.138971000000002	No		A
Triticale.133	Triticale.133.1	550.0									Triticale.133.1	Triticale.133.1	1.0	Triticale.133	1A	27817344.0	27817986.0	0.0	0.0	0.379071	0.0	24.503783	0.0	0.0	No		A
Triticale.136	Triticale.136.1	1575.0											1.0	Triticale.136	1A	28622535.0	28627122.0	6.474444999999999	35.398886	34.979028	92.925856	46.465497	13.040725	39.085189	Yes		A
Triticale.137	Triticale.137.1	1875.0											1.0	Triticale.137	1A	28757100.0	28760209.0	4.997503	2.806404	1.120838	5.022693	4.089879	0.0	16.135779	Yes		A
Triticale.138	Triticale.138.1	1262.0											1.0	Triticale.138	1A	29608131.0	29612144.0	6.554031	2.3711580000000003	2.460961	1.595708	0.0	0.0	15.958657999999998	Yes	TraesCS1A02G047500.1	A
Triticale.139	Triticale.139.1	577.0									Triticale.139.1	Triticale.139.1	1.0	Triticale.139	1A	29804137.0	29804805.0	1.807306	0.0	0.378414	0.0	24.333883	0.0	0.0	No		A
Triticale.140	Triticale.140.1	2403.0											1.0	Triticale.140	1A	29982850.0	29985440.0	0.0	0.0	0.0	0.0	17.041114	0.0	0.0	No		A
Triticale.142	Triticale.142.1	2342.0											1.0	Triticale.142	1A	30793922.0	30800634.0	3.629067	4.312278	1.877067	11.78753	0.580449	0.0	6.45688	Yes		A
Triticale.141	Triticale.141.1	1247.0											1.0	Triticale.141	1A	31031094.0	31032449.0	1.575419	17.071087	27.698356	9.398158	1.495882	9.108092999999998	0.0	Yes	TraesCS1A02G049500.1	A
Triticale.143	Triticale.143.1	1341.0											1.0	Triticale.143	1A	31777709.0	31781938.0	19.121826	56.834076	44.10684000000001	40.510368	13.872657	5.180663	16.828448	Yes		A
Triticale.145	Triticale.145.1	1605.0											1.0	Triticale.145	1A	32084707.0	32089178.0	2.902436	7.808510000000001	3.451794	0.0	5.547474	12.743088	2.889667	Yes	TraesCS1A02G050100.2	A
Triticale.144	Triticale.144.1	416.0											1.0	Triticale.144	1A	32260048.0	32261170.0	0.0	0.0	1.235627	0.0	0.0	14.413432	0.0	Yes		A
Triticale.147	Triticale.147.1	675.0											1.0	Triticale.147	1A	32291317.0	32292106.0	156.735526	1.545289	3.707038	0.0	0.0	0.0	0.0	Yes	TraesCS1A02G050600.1	A
Triticale.146	Triticale.146.1	708.0											1.0	Triticale.146	1A	32302130.0	32302932.0	52.718261	0.0	0.477587	0.0	0.0	0.0	0.0	Yes	TraesCS1A02G050700.1	A
Triticale.148	Triticale.148.1	711.0											1.0	Triticale.148	1A	32376319.0	32377029.0	39.160972	0.0	1.277434	0.0	0.0	0.0	0.0	No		A
Triticale.150	Triticale.150.1	691.0											1.0	Triticale.150	1A	32451297.0	32452090.0	207.921656	0.0	0.195296	0.0	0.0	0.0	0.0	Yes	TraesCS1A02G050800.1	A
Triticale.149	Triticale.149.1	734.0											1.0	Triticale.149	1A	32454367.0	32455183.0	93.535403	0.0	5.038448000000002	0.0	0.0	0.0	0.0	Yes	TraesCS1A02G050900.1	A
Triticale.151	Triticale.151.1	3530.0											1.0	Triticale.151	1A	32890600.0	32894722.0	8.186003999999999	4.805308999999999	1.091468	8.456679	1.378207	12.927176	3.095561	Yes	TraesCS1A02G051300.1	A
Triticale.155	Triticale.155.1	954.0											2.0	Triticale.155	1A	33019233.0	33022457.0	24.923812	31.241721	51.418613	67.555438	7.726868	39.070374	276.527191	Yes	TraesCS1A02G051500.1	A
Triticale.155	Triticale.155.2	925.0											2.0	Triticale.155	1A	33019233.0	33022457.0	24.923812	31.241721	51.418613	67.555438	7.726868	39.070374	276.527191	Yes		A
Triticale.152	Triticale.152.1	414.0									Triticale.152.1	Triticale.152.1	1.0	Triticale.152	1A	33205105.0	33205518.0	0.0	34.738059	20.861748	1.989343	0.0	36.20765	2.3960220000000003	No		A
Triticale.153	Triticale.153.1	371.0									Triticale.153.1	Triticale.153.1	1.0	Triticale.153	1A	33208237.0	33208607.0	0.0	14.605355	5.023974	0.0	0.0	0.0	0.0	No		A
Triticale.154	Triticale.154.1	587.0											1.0	Triticale.154	1A	33208966.0	33211155.0	0.0	9.78468	4.625704	0.0	0.0	0.0	0.0	No		A
Triticale.156	Triticale.156.1	1086.0											1.0	Triticale.156	1A	33370778.0	33373193.0	43.453448	2.83699	1.730953	1.392697	0.515626	8.693187	1.030007	Yes		A
Triticale.159	Triticale.159.1	566.0											1.0	Triticale.159	1A	33375413.0	33377767.0	36.2831	2.643464	3.683556	3.220507	1.641487	26.025671	9.312852	Yes	TraesCS1A02G051900.1	A
Triticale.158	Triticale.158.1	1117.0	Triticale.158.1	LTR	Gypsy	tat	no	-	INT|tat	Triticale.158			1.0	Triticale.158	1A	33436358.0	33437474.0	0.0	0.0	0.0	0.0	0.0	0.0	8.582927	No		A
Triticale.157	Triticale.157.1	1651.0											1.0	Triticale.157	1A	33666074.0	33667724.0	0.0	0.0	0.0	0.0	0.0	0.0	8.421064999999999	No		A
Triticale.160	Triticale.160.1	1367.0											1.0	Triticale.160	1A	33897702.0	33899513.0	0.0	0.0	0.0	8.053003	0.0	0.0	0.0	No		A
Triticale.163	Triticale.163.1	2803.0											1.0	Triticale.163	1A	34164589.0	34174094.0	0.949343	4.910431	2.213572	5.574742	16.39055	0.0	4.911163	Yes		A
Triticale.161	Triticale.161.1	351.0									Triticale.161.1	Triticale.161.1	1.0	Triticale.161	1A	34287473.0	34287823.0	1.37184	8.935407000000003	11.750134	21.418834	13.465615	20.162373	3.908409	No		A
Triticale.165	Triticale.165.1	1571.0											1.0	Triticale.165	1A	35937805.0	35940259.0	3.287288	0.0	0.0	1.924401	0.0	0.0	7.7852169999999985	Yes		A
Triticale.164	Triticale.164.1	1168.0											1.0	Triticale.164	1A	36278601.0	36281199.0	4.44482	18.457955	12.366882	18.547895	14.577015	12.056446	29.51684	Yes	TraesCS1A02G055200.1	A
Triticale.166	Triticale.166.1	1152.0											1.0	Triticale.166	1A	36567422.0	36569885.0	0.938628	1.332422	1.85587	0.0	1.800545	14.413432	0.0	Yes		A
Triticale.167	Triticale.167.1	1753.0											1.0	Triticale.167	1A	37465850.0	37468260.0	0.0	6.077866	3.218107	12.373774	32.328671	12.990999	3.780431	Yes	TraesCS1A02G057100.1	A
Triticale.169	Triticale.169.1	2103.0											1.0	Triticale.169	1A	37478372.0	37481857.0	9.67639	1.143525	0.0	0.0	0.0	0.0	0.0	Yes	TraesCS1A02G057200.1	A
Triticale.168	Triticale.168.1	465.0									Triticale.168.1	Triticale.168.1	1.0	Triticale.168	1A	37484982.0	37485446.0	0.0	9.821271	0.0	0.0	0.0	0.0	0.0	No		A
Triticale.171	Triticale.171.1	483.0									Triticale.171.1	Triticale.171.1	1.0	Triticale.171	1A	38343819.0	38344950.0	0.911421	2.750622	6.720474	0.0	2.918896	0.0	11.841743	Yes		A
Triticale.170	Triticale.170.1	665.0									Triticale.170.1	Triticale.170.1	1.0	Triticale.170	1A	39198997.0	39199821.0	0.0	3.009811	2.422067	7.005222	2.1877310000000003	0.0	3.205483	No		A
Triticale.172	Triticale.172.1	1081.0											1.0	Triticale.172	1A	40147850.0	40151816.0	0.0	148.652082	99.277787	6.031912	0.0	70.333814	0.0	Yes	TraesCS1A02G059300.1	A
Triticale.173	Triticale.173.1	1825.0											1.0	Triticale.173	1A	41709234.0	41711728.0	0.795647	5.505726999999999	2.470299	8.952743	0.0	0.0	1.361731	No		A
Triticale.174	Triticale.174.1	1267.0											1.0	Triticale.174	1A	41747501.0	41750066.0	7.511985000000001	0.451263	0.0	1.048392	0.0	0.0	4.501766	Yes	TraesCS1A02G060700.1	A
Triticale.175	Triticale.175.1	630.0											1.0	Triticale.175	1A	41919073.0	41919883.0	103.073238	0.0	0.0	0.0	0.0	0.0	0.0	Yes	TraesCS1A02G061400.1	A
Triticale.176	Triticale.176.1	602.0											1.0	Triticale.176	1A	42503085.0	42505412.0	0.0	5.793097	1.236075	47.191893	8.231064	0.0	118.577629	Yes		A
Triticale.177	Triticale.177.1	1490.0											1.0	Triticale.177	1A	42546063.0	42550350.0	40.051055	0.98877	0.770609	3.734166000000001	8.195502000000001	0.0	0.0	Yes	TraesCS1A02G062100.1	A
Triticale.178	Triticale.178.1	1009.0											1.0	Triticale.178	1A	42670658.0	42671830.0	9.918383	28.37018	36.056119	2.03976	5.414128	33.269458	8.633554	Yes	TraesCS1A02G062500.1	A
Triticale.179	Triticale.179.1	607.0											1.0	Triticale.179	1A	42686081.0	42686851.0	0.0	4.14032	6.933822	0.0	0.0	14.413432	0.0	Yes	TraesCS1A02G062600.1	A
Triticale.180	Triticale.180.1	427.0											1.0	Triticale.180	1A	44364418.0	44364945.0	2.8158830000000004	0.0	0.0	0.0	0.0	14.413432	0.0	Yes		A
Triticale.181	Triticale.181.1	417.0									Triticale.181.1	Triticale.181.1	1.0	Triticale.181	1A	44861239.0	44861655.0	44.847046	2.093639	5.552442	15.902475	3.52337	0.0	42.312025	No		A
Triticale.182	Triticale.182.1	1618.0											1.0	Triticale.182	1A	45543088.0	45548553.0	19.421124	0.855808	1.541354	0.0	0.308252	18.003428	0.0	Yes	TraesCS1A02G064000.1	A
Triticale.183	Triticale.183.1	803.0											1.0	Triticale.183	1A	46237102.0	46239971.0	0.9000540000000001	10.77187	0.464516	2.93252	1.78485	0.0	0.0	No		A
Triticale.184	Triticale.184.1	1491.0											1.0	Triticale.184	1A	47731355.0	47733105.0	0.0	0.0	0.330003	6.485521	0.0	0.0	3.174305	No		A
Triticale.186	Triticale.186.1	1097.0											1.0	Triticale.186	1A	47789408.0	47791886.0	9.270766	2.712666	2.50664	0.0	5.944918	0.0	0.0	No		A
Triticale.185	Triticale.185.1	239.0									Triticale.185.1	Triticale.185.1	1.0	Triticale.185	1A	48307396.0	48307634.0	0.0	1.581607	1.876324	5.115453	8.97259	0.0	0.0	No		A
Triticale.187	Triticale.187.1	2954.0											1.0	Triticale.187	1A	48578229.0	48591120.0	1.56904	2.050093	2.02381	0.0	1.753612	14.203615	1.80582	Yes		A
Triticale.191	Triticale.191.1	1535.0											1.0	Triticale.191	1A	49099009.0	49103314.0	11.461041	2.652155	9.862031	9.075623	18.717459	10.516645	4.850116000000001	Yes	TraesCS1A02G066800.2	A
Triticale.189	Triticale.189.1	653.0											1.0	Triticale.189	1A	49103858.0	49104510.0	0.0	0.790804	4.41476	5.115453	5.393364	0.0	10.197174	No		A
Triticale.190	Triticale.190.1	1404.0											1.0	Triticale.190	1A	49251399.0	49252802.0	6.521591	1.581607	2.125932	0.0	13.616943	19.895465	0.0	Yes		A
Triticale.195	Triticale.195.1	2725.0											1.0	Triticale.195	1A	49284338.0	49288795.0	3.027376	0.751627	1.383854	7.149744	5.856232	2.866817	2.8676220000000003	Yes		A
Triticale.192	Triticale.192.1	1029.0											1.0	Triticale.192	1A	49365308.0	49367228.0	14.92044	0.38887	1.18621	0.0	0.0	0.0	11.009062	Yes	TraesCS1A02G068000.1	A
Triticale.194	Triticale.194.1	1048.0											2.0	Triticale.194	1A	49377646.0	49379273.0	14.523479	8.246445	10.221988	18.09136	9.131313	4.277272	14.263260999999998	No		A
Triticale.194	Triticale.194.2	967.0											2.0	Triticale.194	1A	49377646.0	49379273.0	14.523479	8.246445	10.221988	18.09136	9.131313	4.277272	14.263260999999998	No		A
Triticale.193	Triticale.193.1	1531.0											1.0	Triticale.193	1A	49528457.0	49531578.0	1.421736	0.400825	2.693858	0.0	2.5814470000000003	0.0	8.002408	Yes		A
Triticale.196	Triticale.196.1	461.0									Triticale.196.1	Triticale.196.1	1.0	Triticale.196	1A	50188813.0	50189726.0	7.168997999999998	0.0	0.180079	1.864201	0.0	0.0	0.0	No		A
Triticale.198	Triticale.198.1	2165.0											1.0	Triticale.198	1A	51700021.0	51707185.0	16.50554	3.190975	1.456055	1.342856	0.0	1.957301	2.278702	Yes	TraesCS1A02G069300.1	A
Triticale.199	Triticale.199.1	1122.0											1.0	Triticale.199	1A	52056090.0	52060055.0	12.806997	21.861282	20.453978	5.328216	3.707006	17.907593	14.601665	Yes	TraesCS1A02G069400.1	A
Triticale.197	Triticale.197.1	478.0									Triticale.197.1	Triticale.197.1	1.0	Triticale.197	1A	52235802.0	52236279.0	4.451609	0.0	0.45441	0.0	0.0	24.786274	0.651265	Yes		A
Triticale.200	Triticale.200.1	416.0									Triticale.200.1	Triticale.200.1	1.0	Triticale.200	1A	52458963.0	52459466.0	4.5013510000000005	0.0	0.379071	1.504305	0.0	0.0	8.307713	Yes		A
Triticale.202	Triticale.202.1	1126.0											1.0	Triticale.202	1A	52482092.0	52483430.0	0.6985520000000001	4.982204	4.130734	0.96615	5.37765	7.539536	22.890736	Yes		A
Triticale.201	Triticale.201.1	385.0											1.0	Triticale.201	1A	52532438.0	52532822.0	0.0	0.0	0.0	0.0	0.0	0.0	10.23749	No		A
Triticale.203	Triticale.203.1	1563.0											1.0	Triticale.203	1A	52564112.0	52566286.0	0.912204	0.0	0.0	1.674605	12.585384	0.0	0.0	No		A
Triticale.204	Triticale.204.1	1416.0											1.0	Triticale.204	1A	53032274.0	53037595.0	7.100028999999998	0.0	1.045659	0.0	0.0	0.0	3.092775	Yes	TraesCS1A02G070300.1	A
Triticale.205	Triticale.205.1	793.0									Triticale.205.1	Triticale.205.1	1.0	Triticale.205	1A	54022139.0	54024092.0	3.926139	1.973519	0.365209	3.2855870000000005	0.0	14.413432	0.0	Yes		A
Triticale.206	Triticale.206.1	1799.0											2.0	Triticale.206	1A	54074772.0	54079094.0	19.202612	13.047602	6.953978	8.41257	4.595944	0.0	6.951058	Yes		A
Triticale.206	Triticale.206.2	1778.0											2.0	Triticale.206	1A	54074772.0	54079094.0	19.202612	13.047602	6.953978	8.41257	4.595944	0.0	6.951058	Yes		A
Triticale.210	Triticale.210.1	2093.0											1.0	Triticale.210	1A	54349175.0	54355311.0	16.292567000000002	7.7893979999999985	7.254699	9.093596	9.806217	4.393589	10.487157	Yes	TraesCS1A02G072000.1	A
Triticale.212	Triticale.212.1	2348.0											1.0	Triticale.212	1A	54458835.0	54461788.0	14.551385	0.0	0.0	0.0	0.0	0.0	3.468757	Yes	TraesCS1A02G072100.1	A
Triticale.213	Triticale.213.1	1163.0											1.0	Triticale.213	1A	54461098.0	54462810.0	1.835575	2.311894	0.400584	10.824704	2.573092	0.0	17.246303	Yes	TraesCS1A02G072200.1	A
Triticale.207	Triticale.207.1	388.0									Triticale.207.1	Triticale.207.1	1.0	Triticale.207	1A	55006258.0	55006645.0	0.0	9.088128	0.0	0.0	0.0	0.0	0.0	No		A
Triticale.208	Triticale.208.1	1770.0											1.0	Triticale.208	1A	56337275.0	56339680.0	11.540878	0.0	0.0	0.0	0.0	0.0	0.0	Yes	TraesCS1A02G072300.1	A
Triticale.211	Triticale.211.1	1396.0											1.0	Triticale.211	1A	56617368.0	56618763.0	13.981922	1.427526	0.742394	0.0	0.0	9116-02-01	0.0	Yes	TraesCS1A02G072600.1	A
Triticale.214	Triticale.214.1	224.0											1.0	Triticale.214	1A	57204799.0	57205022.0	0.0	10.845308	0.0	0.0	0.0	0.0	0.0	Yes		A
Triticale.215	Triticale.215.1	1190.0											1.0	Triticale.215	1A	57766774.0	57769709.0	3.132177	1.751066	3.254918	1.637804	0.91389	0.0	15.500939	Yes		A
Triticale.216	Triticale.216.1	1821.0											1.0	Triticale.216	1A	58199789.0	58204396.0	9.618228	2.345921	0.49502	1.144259	0.0	0.0	3.731983	Yes	TraesCS1A02G075100.1	A
Triticale.217	Triticale.217.1	2904.0											1.0	Triticale.217	1A	58902266.0	58908383.0	2.227624	3.581491	2.411881	7.516991	0.0	2.238449	4.49144	Yes		A
Triticale.218	Triticale.218.1	1184.0											1.0	Triticale.218	1A	59130839.0	59135681.0	1.960495	1.7312189999999998	0.5401130000000001	0.0	0.0	14.413432	0.0	Yes		A
Triticale.219	Triticale.219.1	1637.0											1.0	Triticale.219	1A	59507691.0	59510141.0	5.847931	0.435739	0.0	0.0	1.036111	0.0	0.0	Yes	TraesCS1A02G076700.1	A
Triticale.220	Triticale.220.1	1432.0											1.0	Triticale.220	1A	59613357.0	59616276.0	1.978852	12.954933	14.008966	21.472756	2.290916	0.0	25.574821	Yes	TraesCS1A02G076900.1	A
Triticale.222	Triticale.222.1	1848.0											1.0	Triticale.222	1A	59856961.0	59860644.0	13.043776	1.571765	1.7074619999999998	3.002469	9.210257	0.0	3.2377580000000004	Yes	TraesCS1A02G077200.1	A
Triticale.221	Triticale.221.1	1593.0											1.0	Triticale.221	1A	60537167.0	60540748.0	8.037550999999999	0.27353	0.225587	0.0	0.0	0.0	0.0	Yes	TraesCS1A02G077700.2	A
Triticale.223	Triticale.223.1	934.0											1.0	Triticale.223	1A	61575768.0	61577009.0	23.184305	9.12049	8.519772	168.441172	10.841826	0.0	109.532272	Yes	TraesCS1A02G078800.1	A
Triticale.225	Triticale.225.1	1672.0											1.0	Triticale.225	1A	62609643.0	62613979.0	18.900549	23.235061	37.308383	26.299302	5.494246	53.61935	30.474708000000003	Yes		A
Triticale.224	Triticale.224.1	370.0											1.0	Triticale.224	1A	62794172.0	62794541.0	21.745721	0.0	0.0	0.0	0.0	0.0	0.0	Yes	TraesCS1A02G079900.1	A
Triticale.227	Triticale.227.1	1532.0											1.0	Triticale.227	1A	63741458.0	63747719.0	4.336557	7.197759	3.771662	0.0	0.0	3.678625	0.0	Yes	TraesCS1A02G080700.1	A
Triticale.226	Triticale.226.1	1223.0											1.0	Triticale.226	1A	64692498.0	64694061.0	2.046868	0.0	1.113038	11.572162	4.599266	0.0	7.256601	Yes	TraesCS1A02G081400.1	A
Triticale.228	Triticale.228.1	1402.0											1.0	Triticale.228	1A	64835534.0	64836935.0	7.679742	0.129732	0.0	0.0	0.0	0.0	0.0	Yes	TraesCS1A02G081600.1	A
Triticale.229	Triticale.229.1	1375.0											1.0	Triticale.229	1A	64838639.0	64840013.0	20.239542	0.0	0.467843	0.0	0.312967	0.0	0.0	Yes	TraesCS1A02G081700.1	A
Triticale.231	Triticale.231.1	2138.0											1.0	Triticale.231	1A	65261477.0	65265780.0	4.398994	80.092733	16.452904999999998	40.159576	24.808446	7.995475999999999	4.743285	Yes	TraesCS1A02G082000.1	A
Triticale.230	Triticale.230.1	903.0											1.0	Triticale.230	1A	65758591.0	65759654.0	1.5726950000000002	5.915702	7.359358	0.0	2542-01-01	6.863532000000001	6.906584	Yes	TraesCS1A02G082500.2	A
Triticale.233	Triticale.233.1	1136.0											1.0	Triticale.233	1A	65790413.0	65795583.0	5.078174	18.618694	20.208245	11.595327	7.092814999999999	11.12727	10.181123	Yes	TraesCS1A02G082600.1	A
Triticale.232	Triticale.232.1	2412.0											1.0	Triticale.232	1A	66174940.0	66177799.0	5.730999	0.0	0.057364	0.0	0.0	0.0	0.0	Yes	TraesCS1A02G083000.1	A
Triticale.234	Triticale.234.1	1041.0											1.0	Triticale.234	1A	67683225.0	67687269.0	29.252544	0.46567	1.426707	0.746924	0.427219	11.588904	5.261143	Yes	TraesCS1A02G083400.1	A
Triticale.235	Triticale.235.1	1719.0											1.0	Triticale.235	1A	67688794.0	67698843.0	0.0	2.115711	3.015591	8.227179	0.0	0.0	4.25116	Yes	TraesCS1A02G083500.1	A
Triticale.236	Triticale.236.1	1602.0											1.0	Triticale.236	1A	67733659.0	67737499.0	0.349788	1.083036	0.523649	1.413509	3773-10-01	0.0	1.995922	No		A
Triticale.238	Triticale.238.1	1625.0											1.0	Triticale.238	1A	68373521.0	68375317.0	0.0	2.865386	2.589583	18.207865	8.878627	3.831753	46.081206	Yes	TraesCS1A02G083800.1	A
Triticale.237	Triticale.237.1	342.0											1.0	Triticale.237	1A	68461413.0	68461843.0	0.902949	0.0	1.899791	0.0	12.161577	0.0	0.0	No		A
Triticale.239	Triticale.239.1	1210.0											1.0	Triticale.239	1A	70040136.0	70041345.0	11.628899	0.0	0.0	0.59328	0.0	0.0	0.0	Yes	TraesCS1A02G084300.1	A
Triticale.240	Triticale.240.1	1914.0											1.0	Triticale.240	1A	71689929.0	71694820.0	28.981723	381.472727	423.209468	117.868338	359.79577	406.904581	177.377973	Yes	TraesCS1A02G085600.1	A
Triticale.241	Triticale.241.1	1774.0											1.0	Triticale.241	1A	72782626.0	72785888.0	0.0	0.428389	25.32599	49.21677	1.337722	5.695496	4.984874	Yes	TraesCS1A02G086100.2	A
Triticale.242	Triticale.242.1	2232.0											1.0	Triticale.242	1A	73296119.0	73300581.0	4.949243	6.203132	3.09524	0.7670130000000001	6.952105	0.0	7.418094	Yes		A
Triticale.247	Triticale.247.1	1746.0											1.0	Triticale.247	1A	73302087.0	73306610.0	9.290049	6.156130999999999	2.115505	12.179232	6.424626	6.604089999999999	7.143924	Yes	TraesCS1A02G086600.1	A
Triticale.243	Triticale.243.1	387.0									Triticale.243.1	Triticale.243.1	1.0	Triticale.243	1A	73314642.0	73315490.0	2.745547	1.618389	0.521101	2.6216150000000003	0.0	0.0	8.453066	Yes		A
Triticale.244	Triticale.244.1	1002.0											1.0	Triticale.244	1A	73327950.0	73330060.0	2.087088	3.560195	2.648204	1.550293	0.0	0.0	10.147233	Yes		A
Triticale.245	Triticale.245.1	1161.0									Triticale.245.1	Triticale.245.1	1.0	Triticale.245	1A	74016282.0	74030875.0	0.0	6.085306	2.028244	0.0	0.0	0.0	0.0	No		A
Triticale.246	Triticale.246.1	968.0											1.0	Triticale.246	1A	74340714.0	74341989.0	76.242166	0.812045	0.873274	2.193092	0.0	0.0	0.0	No		A
Triticale.248	Triticale.248.1	857.0											1.0	Triticale.248	1A	74426930.0	74433105.0	0.0	0.0	0.567944	0.0	8.187543	0.0	0.0	Yes		A
Triticale.251	Triticale.251.1	1118.0											1.0	Triticale.251	1A	74436721.0	74449424.0	0.0	0.0	0.0	0.0	10.666377	0.0	0.0	Yes		A
Triticale.249	Triticale.249.1	1483.0											1.0	Triticale.249	1A	75184562.0	75186044.0	0.0	0.0	0.0	0.0	0.0	0.0	10.438846	No		A
Triticale.250	Triticale.250.1	1053.0											1.0	Triticale.250	1A	75457866.0	75458918.0	0.0	0.0	0.368272	0.0	0.0	0.0	9.745961	No		A
Triticale.252	Triticale.252.1	839.0											1.0	Triticale.252	1A	75715674.0	75716512.0	0.0	0.790804	1.516286	3.410302	0.0	0.0	8.062315	Yes		A
Triticale.253	Triticale.253.1	2255.0											1.0	Triticale.253	1A	76485698.0	76492268.0	6.028445	3.586847	6.240978	5.985042	5.801668	21.45716	0.0	Yes	TraesCS1A02G088100.1	A
Triticale.254	Triticale.254.1	486.0									Triticale.254.1	Triticale.254.1	1.0	Triticale.254	1A	77097478.0	77098959.0	16.422121	28.846437	15.221356	9.245006	5.857328	0.0	19.683175	Yes		A
Triticale.257	Triticale.257.1	1569.0											1.0	Triticale.257	1A	77103810.0	77107978.0	5.364955	34.467249	21.946037	47.620332	31.521591	14.395055	27.8715	Yes	TraesCS1A02G088900.1	A
Triticale.255	Triticale.255.1	3060.0											1.0	Triticale.255	1A	77559052.0	77562261.0	0.0	0.0	0.0	0.0	19.316437	0.0	0.0	No		A
Triticale.256	Triticale.256.1	562.0									Triticale.256.1	Triticale.256.1	1.0	Triticale.256	1A	78337414.0	78337975.0	5.955776999999999	5.062832	6.883317	3.3587230000000003	13.33749	0.0	5.27635	Yes		A
Triticale.258	Triticale.258.1	1261.0											1.0	Triticale.258	1A	78543153.0	78548310.0	0.926718	13.913379	17.781485999999994	11.721053	29.668303	8.13827	14.904327	Yes	TraesCS1A02G089300.1	A
Triticale.259	Triticale.259.1	635.0											1.0	Triticale.259	1A	78954048.0	78955742.0	0.0	1.300156	1.895357	3.410302	0.0	26.17116	0.0	Yes		A
Triticale.263	Triticale.263.1	2747.0											1.0	Triticale.263	1A	79688752.0	79694804.0	13.676560999999998	5.425368	6.338373000000002	15.878947	9.73553	7.3667479999999985	18.510443	Yes	TraesCS1A02G089900.1	A
Triticale.261	Triticale.261.1	2458.0											1.0	Triticale.261	1A	79698067.0	79702819.0	4.250937	5.70775	9.050832000000002	4.495966	4.544581	0.0	8.874055	Yes		A
Triticale.262	Triticale.262.1	2010.0											1.0	Triticale.262	1A	80190104.0	80195903.0	14.940992	1.4620030000000002	9414-03-01	11.838498	14.837029	13.739373	9.799311	Yes	TraesCS1A02G090100.1	A
Triticale.260	Triticale.260.1	330.0	Triticale.260.1	LTR	Gypsy	reina	no	-	GAG|reina	Triticale.260	Triticale.260.1	Triticale.260.1	1.0	Triticale.260	1A	80624991.0	80625320.0	0.0	5.878307	14.604588	3.436138	0.0	0.0	0.0	Yes		A
Triticale.264	Triticale.264.1	1184.0											1.0	Triticale.264	1A	80683837.0	80687044.0	7.727031	6.29771	1.789384	2.209207	11.975755	20.42714800000001	3.181855	Yes		A
Triticale.265	Triticale.265.1	3068.0											1.0	Triticale.265	1A	82519224.0	82528049.0	5.315729	2.695125	5.334059	7.731536	0.5686859999999999	4.768453	9.87682	Yes		A
Triticale.267	Triticale.267.1	2468.0											1.0	Triticale.267	1A	82530198.0	82535445.0	5.675503	7.201825	5.30101	24.101492	11.42996	0.0	7.713564	Yes		A
Triticale.266	Triticale.266.1	2406.0											1.0	Triticale.266	1A	82947262.0	82952662.0	18.116763	7.922828	1.1576959999999998	2.912788	1.853679	0.0	0.0	Yes		A
Triticale.268	Triticale.268.1	1946.0											1.0	Triticale.268	1A	84009693.0	84014691.0	0.929463	2.072101	2.85297	3.813369	1.7903669999999998	23.279249	11.585735	Yes		A
Triticale.269	Triticale.269.1	1477.0											1.0	Triticale.269	1A	85032415.0	85035322.0	27.724787	3.158932	3.716799	2.288157	0.0	0.0	3.436592	Yes	TraesCS1A02G092700.1	A
Triticale.271	Triticale.271.1	2957.0											1.0	Triticale.271	1A	85035698.0	85039796.0	8.18609	3.664119	1.7960060000000002	0.727155	11.169835	0.0	2.523082	No		A
Triticale.270	Triticale.270.1	963.0											1.0	Triticale.270	1A	85319455.0	85320417.0	12.507238	0.0	0.0	0.0	0.0	0.0	0.0	No		A
Triticale.272	Triticale.272.1	1197.0											1.0	Triticale.272	1A	85344049.0	85346466.0	308.324698	216.330743	316.904664	270.087654	12.343587	242.596	449.869442	Yes	TraesCS1A02G092900.1	A
Triticale.273	Triticale.273.1	1451.0											1.0	Triticale.273	1A	86638820.0	86641089.0	67.861939	7.033847	7.229005	4.211759	2.680344	5.125661	24.898113	Yes	TraesCS1A02G093800.1	A
Triticale.274	Triticale.274.1	4762.0											1.0	Triticale.274	1A	86644142.0	86649260.0	7.156396000000001	6.06554	1.318232	3.658089	9.056038	4.679378	1.703016	Yes	TraesCS1A02G093900.4	A
Triticale.275	Triticale.275.1	2090.0											1.0	Triticale.275	1A	87198152.0	87201062.0	6.898239	2.719759	4.176133999999999	0.632292	8.94845	4.572301	10.317912	Yes	TraesCS1A02G094000.1	A
Triticale.276	Triticale.276.1	1961.0											1.0	Triticale.276	1A	90106369.0	90110556.0	463.7821	0.47787	0.212249	0.0	0.0	0.0	0.0	Yes	TraesCS1A02G094700.2	A
Triticale.278	Triticale.278.1	3365.0											1.0	Triticale.278	1A	90759655.0	90768578.0	11.341634	1.990523	3.801078	9.610159	14.959239000000002	0.0	10.68598	Yes		A
Triticale.277	Triticale.277.1	1505.0											1.0	Triticale.277	1A	90804919.0	90806423.0	6.784314	0.27376	0.27404	1.434366	0.0	0.0	0.0	No		A
Triticale.279	Triticale.279.1	1634.0											1.0	Triticale.279	1A	91041265.0	91048634.0	9.77402	3.666542	3.689103	16.185368	21.23299	0.0	11.795902	Yes		A
Triticale.280	Triticale.280.1	1262.0											1.0	Triticale.280	1A	91158603.0	91162754.0	3.564107	0.0	0.461073	7.343499	3.418468	8.143243	0.0	Yes	TraesCS1A02G095500.1	A
Triticale.282	Triticale.282.1	1082.0											1.0	Triticale.282	1A	91498965.0	91502453.0	14.275469	2.929335	6.847810000000001	7.510859	0.81374	29.945836	1.828677	Yes	TraesCS1A02G096000.1	A
Triticale.281	Triticale.281.1	749.0											1.0	Triticale.281	1A	91502767.0	91505217.0	7.027803	0.62293	0.208515	0.0	1.146675	0.0	3.28275	Yes	TraesCS1A02G096100.1	A
Triticale.283	Triticale.283.1	1044.0											2.0	Triticale.283	1A	92564795.0	92568150.0	213.33314500000003	87.071211	166.212098	734.660189	146.71364599999995	164.691402	223.20879	Yes		A
Triticale.283	Triticale.283.2	909.0											2.0	Triticale.283	1A	92564795.0	92568150.0	213.33314500000003	87.071211	166.212098	734.660189	146.71364599999995	164.691402	223.20879	Yes	TraesCS1A02G096500.2	A
Triticale.284	Triticale.284.1	1928.0											1.0	Triticale.284	1A	93393580.0	93397515.0	1.131903	6.801404	3.021561	3.036195	4.912276	3.857539	7.629908	Yes		A
Triticale.285	Triticale.285.1	1346.0											1.0	Triticale.285	1A	93397630.0	93401378.0	14.023628	9.628299	2.908373	3.956305	4.802346	0.0	3.175218	Yes	TraesCS1A02G097200.1	A
Triticale.287	Triticale.287.1	2525.0											1.0	Triticale.287	1A	93693503.0	93698187.0	38.116833	12.993296	19.095892000000006	19.966136	53.06081800000001	38.565212	23.813581	Yes	TraesCS1A02G097400.1	A
Triticale.286	Triticale.286.1	1087.0											1.0	Triticale.286	1A	94110034.0	94114119.0	5.181881	0.644574	0.554483	0.0	0.0	0.0	9.489663	Yes	TraesCS1A02G097600.1	A
Triticale.291	Triticale.291.1	1511.0											2.0	Triticale.291	1A	94245035.0	94249065.0	77.654676	129.374878	140.636981	119.722212	62.90978199999999	76.88944599999998	64.544721	Yes		A
Triticale.291	Triticale.291.2	1512.0											2.0	Triticale.291	1A	94245035.0	94249065.0	77.654676	129.374878	140.636981	119.722212	62.90978199999999	76.88944599999998	64.544721	Yes		A
Triticale.288	Triticale.288.1	1209.0											1.0	Triticale.288	1A	94504161.0	94505673.0	0.0	0.0	0.0	0.0	23.62899	0.0	0.0	No		A
Triticale.290	Triticale.290.1	3680.0											1.0	Triticale.290	1A	94696973.0	94780476.0	0.0	0.0	0.0	0.0	7.440949000000002	0.0	0.0	Yes		A
Triticale.292	Triticale.292.1	1519.0											1.0	Triticale.292	1A	95183261.0	95185789.0	6.5382620000000005	2.949245	0.672546	2.248465	0.532221	0.0	5.238137999999998	Yes	TraesCS1A02G099000.1	A
Triticale.293	Triticale.293.1	1638.0											1.0	Triticale.293	1A	95820621.0	95826073.0	17.158893	18.168209	6.39955	4.298271	2.609581	33.684132	13.822232	Yes	TraesCS1A02G099300.1	A
Triticale.294	Triticale.294.1	1950.0											1.0	Triticale.294	1A	95835790.0	95838935.0	0.7614920000000001	10.422387	9.47037	12.189642999999998	29.23716	7.657597	15.720816	No		A
Triticale.297	Triticale.297.1	2279.0											1.0	Triticale.297	1A	95854753.0	95860989.0	7.608279	3.250658	1.145531	0.974158	0.0	0.0	5.417577	Yes	TraesCS1A02G099500.3	A
Triticale.295	Triticale.295.1	1679.0											1.0	Triticale.295	1A	96453272.0	96455179.0	6.733074	0.290605	0.5366609999999999	0.0	0.0	0.0	1.57756	Yes		A
Triticale.296	Triticale.296.1	337.0									Triticale.296.1	Triticale.296.1	1.0	Triticale.296	1A	97159808.0	97160144.0	0.0	0.523291	0.254214	0.0	8.949296	0.0	0.0	No		A
Triticale.298	Triticale.298.1	401.0									Triticale.298.1	Triticale.298.1	1.0	Triticale.298	1A	97643001.0	97644075.0	1.849167	0.0	0.0	0.0	0.0	14.413432	0.0	Yes		A
Triticale.299	Triticale.299.1	926.0											1.0	Triticale.299	1A	97809155.0	97810185.0	2.25737	0.0	6.497841	0.0	0.0	0.0	0.0	Yes		A
Triticale.300	Triticale.300.1	596.0											1.0	Triticale.300	1A	98019574.0	98021697.0	7.13105	0.0	0.8611790000000001	0.0	0.0	11.197017	0.0	Yes	TraesCS1A02G101900.1	A
Triticale.303	Triticale.303.1	1062.0											1.0	Triticale.303	1A	98242549.0	98244634.0	3.721809	4.939173	2.421488	0.0	0.0	14.413432	0.0	Yes		A
Triticale.301	Triticale.301.1	292.0									Triticale.301.1	Triticale.301.1	1.0	Triticale.301	1A	98575163.0	98575454.0	1.610453	0.790804	0.0	2.668677	0.0	0.0	10.390072	No		A
Triticale.302	Triticale.302.1	237.0									Triticale.302.1	Triticale.302.1	1.0	Triticale.302	1A	98747831.0	98748067.0	0.0	10.957803	0.0	0.0	0.0	0.0	0.0	No		A
Triticale.304	Triticale.304.1	1489.0											1.0	Triticale.304	1A	99001419.0	99010088.0	16.96716	2.620433	6.955667999999998	2206-10-01	0.0	2.623259	2.728538	Yes	TraesCS1A02G102500.1	A
Triticale.306	Triticale.306.1	2173.0											1.0	Triticale.306	1A	99014196.0	99018288.0	13.742494	3.813908	1.363297	0.565767	0.0	11.866377	3.615503	Yes	TraesCS1A02G102600.1	A
Triticale.305	Triticale.305.1	509.0									Triticale.305.1	Triticale.305.1	1.0	Triticale.305	1A	99638567.0	99639075.0	0.0	0.0	0.0	0.0	0.0	0.0	10.335013	No		A
Triticale.307	Triticale.307.1	1461.0											1.0	Triticale.307	1A	99697964.0	99701912.0	20.182101	483.039264	582.016566	13.261897	64.101136	47.837603	18.39319200000001	Yes	TraesCS1A02G103600.1	A
Triticale.308	Triticale.308.1	2589.0											1.0	Triticale.308	1A	100270373.0	100272961.0	4.27875	0.339352	3.710478	12.610478	1.431952	11.919331	16.874537	Yes		A
Triticale.309	Triticale.309.1	1276.0											1.0	Triticale.309	1A	100292349.0	100294539.0	0.56347	2.7498400000000003	2.084002	4.777362	0.0	0.0	11.818031	Yes		A
Triticale.310	Triticale.310.1	2639.0											1.0	Triticale.310	1A	100358924.0	100363085.0	0.0	1.371246	1.897368	18.35735	4.92813	0.0	6.681911	No		A
Triticale.311	Triticale.311.1	1009.0											1.0	Triticale.311	1A	100914908.0	100918678.0	6.267131	0.0	0.0	0.0	0.0	0.0	0.0	No		A
Triticale.312	Triticale.312.1	882.0											1.0	Triticale.312	1A	101334858.0	101335739.0	104.505878	3.299499	1.866562	0.883509	0.0	13.253165	31.825602000000003	Yes	TraesCS1A02G105400.1	A
Triticale.314	Triticale.314.1	1541.0											1.0	Triticale.314	1A	101377424.0	101382058.0	10.590473	2.43194	1.861165	1.281353	3.068287	0.0	5.07091	Yes	TraesCS1A02G105500.1	A
Triticale.313	Triticale.313.1	1286.0											1.0	Triticale.313	1A	101669540.0	101670825.0	0.0	0.0	0.0	5.087608	0.0	0.0	0.0	No		A
Triticale.315	Triticale.315.1	1992.0											1.0	Triticale.315	1A	101763922.0	101767798.0	19.746522	0.576032	3.049318	7.9693559999999986	10.74271	11.866477	9.111771	Yes	TraesCS1A02G105600.1	A
Triticale.316	Triticale.316.1	1735.0											1.0	Triticale.316	1A	102359664.0	102365138.0	36.74768	5.457685	1.611108	2.866816	0.655876	21.358457	3.476006	Yes	TraesCS1A02G105800.1	A
Triticale.317	Triticale.317.1	1156.0											1.0	Triticale.317	1A	102371851.0	102375203.0	16.083337	77.647896	86.53846899999998	39.553307	55.401031	121.354609	61.732379	Yes	TraesCS1A02G106000.1	A
Triticale.318	Triticale.318.1	397.0									Triticale.318.1	Triticale.318.1	1.0	Triticale.318	1A	104276339.0	104276735.0	0.0	7.752666	0.0	0.0	0.0	0.0	0.0	No		A
Triticale.320	Triticale.320.1	1102.0											1.0	Triticale.320	1A	104377540.0	104379785.0	17.287955	1.217063	3.003677	0.0	0.7777310000000001	0.0	20.344111	Yes	TraesCS1A02G106600.1	A
Triticale.321	Triticale.321.1	938.0											1.0	Triticale.321	1A	104379840.0	104383131.0	24.382304	0.582565	0.967885	2.9376580000000003	3.946611	0.0	3.493192	No		A
Triticale.319	Triticale.319.1	846.0											1.0	Triticale.319	1A	104876917.0	104877762.0	0.0	10.258014	4.27822	0.0	0.0	0.0	8.862521000000003	No		A
Triticale.322	Triticale.322.1	455.0											1.0	Triticale.322	1A	104936299.0	104936753.0	0.0	0.0	1.560441	0.0	0.0	31.424452	13.556161	Yes		A
Triticale.323	Triticale.323.1	1472.0											1.0	Triticale.323	1A	105903286.0	105905841.0	0.858283	1.3307209999999998	2.38645	2.057302	8.07432	14.344896	5.183154	Yes		A
Triticale.326	Triticale.326.1	2390.0											2.0	Triticale.326	1A	106219615.0	106230486.0	10.676604	15.589495	19.663859	51.331675	5.143281	0.0	2.044311	Yes	TraesCS1A02G107800.1	A
Triticale.326	Triticale.326.2	2381.0											2.0	Triticale.326	1A	106219615.0	106230486.0	10.676604	15.589495	19.663859	51.331675	5.143281	0.0	2.044311	Yes	TraesCS1A02G107800.4	A
Triticale.324	Triticale.324.1	1088.0											1.0	Triticale.324	1A	107093815.0	107096447.0	8.501999	4.108109	0.0	0.0	0.0	0.0	0.0	Yes	TraesCS1A02G107900.1	A
Triticale.327	Triticale.327.1	1168.0											1.0	Triticale.327	1A	107101021.0	107106881.0	7.557239	8.622334	11.660665	4.420546	26.599662	0.0	14.966224	Yes	TraesCS1A02G108000.1	A
Triticale.325	Triticale.325.1	3614.0											1.0	Triticale.325	1A	107107273.0	107111009.0	2.79069	2.213331	2.150973	11.725153	6.110096	1.922319	0.654067	Yes		A
Triticale.328	Triticale.328.1	1590.0											1.0	Triticale.328	1A	107471590.0	107481945.0	2.18895	3.88588	5.217835	4.8023050000000005	15.121182	0.0	3.2819580000000004	Yes		A
Triticale.331	Triticale.331.1	1377.0											4.0	Triticale.331	1A	107644961.0	107649471.0	29.627246000000003	129.506176	52.504823	28.991033	46.327357	10.543396	0.0	Yes		A
Triticale.331	Triticale.331.2	1420.0											4.0	Triticale.331	1A	107644961.0	107649471.0	29.627246000000003	129.506176	52.504823	28.991033	46.327357	10.543396	0.0	Yes		A
Triticale.331	Triticale.331.3	1359.0											4.0	Triticale.331	1A	107644961.0	107649471.0	29.627246000000003	129.506176	52.504823	28.991033	46.327357	10.543396	0.0	Yes		A
Triticale.331	Triticale.331.4	1635.0											4.0	Triticale.331	1A	107644961.0	107649471.0	29.627246000000003	129.506176	52.504823	28.991033	46.327357	10.543396	0.0	Yes		A
Triticale.329	Triticale.329.1	227.0									Triticale.329.1	Triticale.329.1	1.0	Triticale.329	1A	108078277.0	108078605.0	2.8158830000000004	0.0	0.379071	1.705151	0.0	14.413432	0.0	Yes		A
Triticale.330	Triticale.330.1	1960.0											1.0	Triticale.330	1A	108687041.0	108691587.0	9.180353	3.251172	0.566286	7.885453999999998	2.722865	4.52994	7.386889999999998	Yes		A
Triticale.332	Triticale.332.1	1851.0											1.0	Triticale.332	1A	108692717.0	108697514.0	8.718437	0.690405	0.81999	4.076333999999999	1.451331	0.0	6.667412	Yes		A
Triticale.333	Triticale.333.1	1120.0											1.0	Triticale.333	1A	108772870.0	108774487.0	0.0	3.723132	1.224875	3.815275	0.0	0.0	9.944975	Yes		A
Triticale.334	Triticale.334.1	762.0											1.0	Triticale.334	1A	109424244.0	109426264.0	0.0	0.0	0.0	0.0	10.69694	0.0	0.0	No		A
Triticale.335	Triticale.335.1	1233.0											1.0	Triticale.335	1A	109573775.0	109578560.0	3091-08-01	0.653552	0.0	2.02599	0.0	7.294392999999999	3.414864	Yes		A
Triticale.339	Triticale.339.1	1728.0											2.0	Triticale.339	1A	109982360.0	109986633.0	23.435379	7.394893	5.868149	10.765738	16.946131	0.0	7.120139	Yes	TraesCS1A02G110300.1	A
Triticale.339	Triticale.339.2	1800.0											2.0	Triticale.339	1A	109982360.0	109986633.0	23.435379	7.394893	5.868149	10.765738	16.946131	0.0	7.120139	Yes		A
Triticale.336	Triticale.336.1	558.0											1.0	Triticale.336	1A	110159626.0	110160371.0	69.83188100000001	0.0	0.0	0.0	0.0	0.0	0.0	Yes	TraesCS1A02G110600.1	A
Triticale.337	Triticale.337.1	1614.0											1.0	Triticale.337	1A	111150791.0	111153945.0	13.300715	0.268501	0.129645	0.0	0.0	0.0	0.0	Yes	TraesCS1A02G111000.1	A
Triticale.338	Triticale.338.1	768.0									Triticale.338.1	Triticale.338.1	1.0	Triticale.338	1A	111995380.0	111996147.0	0.0	0.0	2.893875	0.0	0.0	0.0	9.247352	No		A
Triticale.340	Triticale.340.1	1911.0											1.0	Triticale.340	1A	112002832.0	112004742.0	0.597264	17.701423000000005	7.553458999999998	6.54935	0.0	19.836384	75.36814	No		A
Triticale.343	Triticale.343.1	3193.0											1.0	Triticale.343	1A	112035811.0	112042888.0	1.655312	3.421037	3.148442	9.737998	11.951943	19.225428	7.465877000000001	Yes		A
Triticale.342	Triticale.342.1	1438.0											1.0	Triticale.342	1A	113538203.0	113541509.0	5.975103	4.132197	4.345614	8.012312	3.391986	0.0	0.0	Yes	TraesCS1A02G111900.1	A
Triticale.341	Triticale.341.1	962.0											1.0	Triticale.341	1A	113615107.0	113616068.0	0.0	0.0	0.0	0.0	0.0	0.0	9.976796	No		A
Triticale.345	Triticale.345.1	1287.0											1.0	Triticale.345	1A	113850568.0	113858254.0	5.332205	10.132055	14.908592	9.990173	0.0	0.0	4.492363	Yes	TraesCS1A02G112000.1	A
Triticale.346	Triticale.346.1	1371.0											1.0	Triticale.346	1A	113858208.0	113860412.0	5.709637	7.333827	2.420767	3.521861	0.0	6.139632	8.702430999999999	Yes		A
Triticale.344	Triticale.344.1	2184.0											1.0	Triticale.344	1A	113877780.0	113881777.0	5.218323000000002	4.142305	4.941466999999999	29.299863	0.0	0.0	18.085512	Yes		A
Triticale.347	Triticale.347.1	1279.0											1.0	Triticale.347	1A	114060378.0	114063516.0	11.557082	15.672011	23.247244	12.674645	8.205925	5.138806	11.369526	Yes	TraesCS1A02G112400.1	A
Triticale.348	Triticale.348.1	1096.0											1.0	Triticale.348	1A	114544596.0	114546676.0	247.593012	248.65943	338.931019	252.236334	69.08606400000001	362.624069	368.62234	Yes	TraesCS1A02G112500.1	A
Triticale.350	Triticale.350.1	1689.0											1.0	Triticale.350	1A	115357694.0	115363327.0	1.118684	4.388516	2.625446	11.157684	0.0	4.62527	7.438122999999999	Yes		A
Triticale.349	Triticale.349.1	961.0											1.0	Triticale.349	1A	115364297.0	115368884.0	14.964323	1.828477	0.335287	1.048641	0.0	0.0	0.0	Yes		A
Triticale.351	Triticale.351.1	672.0											1.0	Triticale.351	1A	115939762.0	115940521.0	11.658817	0.0	0.0	0.0	0.0	0.0	0.0	Yes	TraesCS1A02G113100.1	A
Triticale.353	Triticale.353.1	1510.0											1.0	Triticale.353	1A	115975792.0	115978733.0	1.437157	0.724292	10.329069	16.254268	10.174868	24.980106	6.114973	Yes		A
Triticale.352	Triticale.352.1	422.0											1.0	Triticale.352	1A	116697075.0	116697611.0	0.0	0.790804	2.945439	0.0	0.0	14.413432	0.0	Yes		A
Triticale.354	Triticale.354.1	1480.0											1.0	Triticale.354	1A	117192083.0	117193881.0	10.861445	0.0	0.0	0.0	0.0	0.0	0.0	Yes		A
Triticale.356	Triticale.356.1	493.0									Triticale.356.1	Triticale.356.1	1.0	Triticale.356	1A	118271311.0	118274682.0	7.7736649999999985	0.7892	0.7850550000000001	4.520553	0.0	0.0	0.0	No		A
Triticale.355	Triticale.355.1	1137.0											1.0	Triticale.355	1A	118289872.0	118291008.0	11.40057	0.0	0.612115	0.0	0.0	0.0	0.0	No		A
Triticale.360	Triticale.360.1	2163.0											4.0	Triticale.360	1A	118504021.0	118509582.0	12.167993	58.385673	58.27900500000001	148.434359	90.124997	31.256781	38.70746	Yes		A
Triticale.360	Triticale.360.2	2133.0											4.0	Triticale.360	1A	118504021.0	118509582.0	12.167993	58.385673	58.27900500000001	148.434359	90.124997	31.256781	38.70746	Yes		A
Triticale.360	Triticale.360.3	2324.0											4.0	Triticale.360	1A	118504021.0	118509582.0	12.167993	58.385673	58.27900500000001	148.434359	90.124997	31.256781	38.70746	Yes		A
Triticale.360	Triticale.360.4	2316.0											4.0	Triticale.360	1A	118504021.0	118509582.0	12.167993	58.385673	58.27900500000001	148.434359	90.124997	31.256781	38.70746	Yes		A
Triticale.357	Triticale.357.1	1159.0											1.0	Triticale.357	1A	119043365.0	119045713.0	0.0	5.8747370000000005	1.0129290000000002	0.0	0.0	14.413432	0.0	Yes		A
Triticale.358	Triticale.358.1	667.0											1.0	Triticale.358	1A	119706809.0	119708003.0	0.80494	0.0	0.238696	0.0	0.0	26.017642	0.0	Yes		A
Triticale.359	Triticale.359.1	967.0											1.0	Triticale.359	1A	119739449.0	119740541.0	11.361568	0.0	0.0	0.0	0.0	0.0	0.0	Yes	TraesCS1A02G115400.1	A
Triticale.362	Triticale.362.1	3186.0											2.0	Triticale.362	1A	121045961.0	121049731.0	4.855174	3.222538	3.3523910000000003	43.860329	25.799936	0.0	9.775989	No		A
Triticale.362	Triticale.362.2	3174.0											2.0	Triticale.362	1A	121045961.0	121049731.0	4.855174	3.222538	3.3523910000000003	43.860329	25.799936	0.0	9.775989	No		A
Triticale.361	Triticale.361.1	582.0											1.0	Triticale.361	1A	121129148.0	121129901.0	6.2784830000000005	2.303114	0.917066	3.694494	2.830754	9.237467	0.0	Yes	TraesCS1A02G115900.1	A
Triticale.363	Triticale.363.1	2194.0											1.0	Triticale.363	1A	121133192.0	121137479.0	5.886744	0.500289	1.05791	0.0	0.0	0.0	6.555753999999999	Yes		A
Triticale.367	Triticale.367.1	4170.0											1.0	Triticale.367	1A	121739795.0	121746209.0	9.470011	5.091296	2.607684	7.178808	4.286765	17.949392	5.841943	Yes		A
Triticale.364	Triticale.364.1	665.0											1.0	Triticale.364	1A	123552703.0	123555145.0	24.695082	4.939847	13.851212	1.410276	2.867334	9.515027	7.704262	Yes	TraesCS1A02G116600.1	A
Triticale.365	Triticale.365.1	752.0											1.0	Triticale.365	1A	124010997.0	124012030.0	25.189421	6.163432	8.59615	0.0	0.0	0.0	1.817254	Yes		A
Triticale.366	Triticale.366.1	384.0											1.0	Triticale.366	1A	124189773.0	124190156.0	22.52462	0.0	0.0	0.0	0.309469	0.0	0.0	Yes	TraesCS1A02G117000.1	A
Triticale.368	Triticale.368.1	799.0											1.0	Triticale.368	1A	124786583.0	124787381.0	7.891991	0.0	0.145651	0.0	0.0	0.0	0.0	Yes	TraesCS1A02G117400.1	A
Triticale.369	Triticale.369.1	812.0											1.0	Triticale.369	1A	124885960.0	124886971.0	3.72908	0.0	0.0	0.0	0.0	28.063586	0.0	Yes		A
Triticale.370	Triticale.370.1	1142.0											1.0	Triticale.370	1A	127075151.0	127077631.0	8.104088	0.727789	0.661881	2.466646	0.0	0.0	2.638175	Yes	TraesCS1A02G118400.1	A
Triticale.371	Triticale.371.1	1754.0											1.0	Triticale.371	1A	127352105.0	127355810.0	2.462158	0.8183060000000001	4.072316000000002	7.689706	0.0	0.0	1.567261	Yes	TraesCS1A02G118700.1	A
Triticale.373	Triticale.373.1	2143.0											1.0	Triticale.373	1A	127756687.0	127761037.0	1.708189	8.343108	7.285672	16.147612	1.458584	12.557111	4.333355	Yes		A
Triticale.372	Triticale.372.1	512.0									Triticale.372.1	Triticale.372.1	1.0	Triticale.372	1A	128524750.0	128526089.0	1.552769	0.656429	12.884727	3.550177	0.0	11.035284	0.0	No		A
Triticale.374	Triticale.374.1	1831.0											1.0	Triticale.374	1A	129003093.0	129005020.0	10.82267	0.4556520000000001	0.06687	0.0	0.0	0.0	0.0	Yes	TraesCS1A02G119100.1	A
Triticale.375	Triticale.375.1	1012.0									Triticale.375.1	Triticale.375.1	1.0	Triticale.375	1A	129995671.0	129999924.0	4.598533	4.75967	11.825755	17.226743	2.992605	0.0	0.0	No		A
Triticale.376	Triticale.376.1	653.0											1.0	Triticale.376	1A	130462831.0	130482669.0	0.0	0.0	1.443142	9.003615	0.0	0.0	2.933102	No		A
Triticale.378	Triticale.378.1	1573.0											1.0	Triticale.378	1A	130909358.0	130913217.0	1.698838	7.085058	3.164632	10.743643	0.0	0.0	7.617667	Yes	TraesCS1A02G119500.1	A
Triticale.377	Triticale.377.1	370.0									Triticale.377.1	Triticale.377.1	1.0	Triticale.377	1A	130933878.0	130934247.0	112.379102	7.234785	6.383768	32.019969	9.479627	12.73836	72.27173	No		A
Triticale.379	Triticale.379.1	2025.0											1.0	Triticale.379	1A	131519869.0	131521893.0	10.501969	0.977863	0.401348	0.0	0.0	0.0	0.0	Yes		A
Triticale.380	Triticale.380.1	507.0									Triticale.380.1	Triticale.380.1	1.0	Triticale.380	1A	131964054.0	131964560.0	3.760065	3.163215	3.512579	0.0	0.0	8.784511	8.991649	Yes		A
Triticale.381	Triticale.381.1	579.0											1.0	Triticale.381	1A	132414662.0	132416209.0	3.864747	3.163215	3.271537	1.681591	7.202181	14.413432	0.0	Yes	TraesCS1A02G120000.1	A
Triticale.382	Triticale.382.1	3158.0											1.0	Triticale.382	1A	132480464.0	132486051.0	6.959160000000002	3.348771	6.207745	56.541576	23.514846	0.0	53.308175	Yes		A
Triticale.383	Triticale.383.1	3353.0											1.0	Triticale.383	1A	132783825.0	132791382.0	32.649014	7.405914	7.469052	29.41372800000001	9.336199	0.0	26.247988	Yes	TraesCS1A02G120200.1	A
Triticale.385	Triticale.385.1	985.0											1.0	Triticale.385	1A	132797900.0	132800842.0	0.6689510000000001	6.795292999999999	9.597627	2.790561	0.0	22.929795	0.0	Yes	TraesCS1A02G120400.1	A
Triticale.384	Triticale.384.1	831.0											1.0	Triticale.384	1A	133126431.0	133127261.0	12.355774	0.0	0.10583	0.0	0.7800199999999999	0.0	0.0	Yes	TraesCS1A02G120500.1	A
Triticale.387	Triticale.387.1	2430.0											1.0	Triticale.387	1A	133412308.0	133418392.0	6.203827	7.081436	2.629789	8.118764	42.96041500000001	0.0	6.668177	Yes	TraesCS1A02G121000.1	A
Triticale.386	Triticale.386.1	301.0											1.0	Triticale.386	1A	133999218.0	133999518.0	6.062101	1.513299	0.0	0.0	0.0	0.0	0.0	No		A
Triticale.389	Triticale.389.1	1337.0											1.0	Triticale.389	1A	134943514.0	134949383.0	21.264797	12.446434	17.164253	2.520104	0.914412	13.335393	10.517179	Yes		A
Triticale.388	Triticale.388.1	1454.0											1.0	Triticale.388	1A	134956661.0	134963839.0	3.018585	3.4460330000000003	3.217675	4.461069	2.418476	0.0	8.923347	Yes	TraesCS1A02G121400.1	A
Triticale.390	Triticale.390.1	2226.0											1.0	Triticale.390	1A	135508961.0	135523923.0	6.318658999999999	0.606425	1.634128	0.0	0.0	0.0	0.0	Yes	TraesCS1A02G121700.3	A
Triticale.391	Triticale.391.1	945.0											1.0	Triticale.391	1A	135968658.0	135971664.0	6.875324000000001	10.538192	8.627586	6.548141	13.815612	12.964464	15.661546	Yes	TraesCS1A02G122000.1	A
Triticale.393	Triticale.393.1	2144.0											1.0	Triticale.393	1A	138225447.0	138228964.0	7.473560000000001	0.0	0.322494	0.0	0.0	0.0	0.0	Yes		A
Triticale.392	Triticale.392.1	278.0									Triticale.392.1	Triticale.392.1	1.0	Triticale.392	1A	138320250.0	138320527.0	0.938628	0.0	1.883085	6.7408660000000005	0.0	0.0	0.0	No		A
Triticale.395	Triticale.395.1	1317.0											1.0	Triticale.395	1A	139558033.0	139561261.0	50.42362	134.001302	153.228323	153.65778899999995	128.816222	243.44144900000003	248.773681	Yes	TraesCS1A02G122700.1	A
Triticale.394	Triticale.394.1	282.0									Triticale.394.1	Triticale.394.1	1.0	Triticale.394	1A	139815207.0	139815488.0	0.0	7.714542999999999	0.0	0.0	0.0	0.0	0.0	No		A
Triticale.397	Triticale.397.1	1194.0											1.0	Triticale.397	1A	141432857.0	141437604.0	13.536206	98.632564	85.117408	44.823764	26.569352	132.847418	35.127056	Yes	TraesCS1A02G123000.1	A
Triticale.396	Triticale.396.1	653.0											1.0	Triticale.396	1A	142101506.0	142102158.0	105.469842	0.618837	0.360495	0.8356020000000001	0.0	0.0	1.850358	Yes	TraesCS1A02G123100.1	A
Triticale.398	Triticale.398.1	552.0									Triticale.398.1	Triticale.398.1	1.0	Triticale.398	1A	142890145.0	142892569.0	10.913248	3.484121	3.252323	5.832111	2.955242	0.0	13.076172	No		A
Triticale.399	Triticale.399.1	403.0									Triticale.399.1	Triticale.399.1	1.0	Triticale.399	1A	143818952.0	143819354.0	0.0	9.950784	0.433628	0.0	0.0	0.0	0.0	Yes		A
Triticale.400	Triticale.400.1	558.0											1.0	Triticale.400	1A	144781457.0	144782014.0	0.0	0.0	0.0	0.0	0.0	22.162583	0.0	No		A
Triticale.401	Triticale.401.1	555.0											1.0	Triticale.401	1A	145297928.0	145298482.0	0.0	0.0	0.0	0.0	0.0	28.333434000000004	0.0	No		A
Triticale.402	Triticale.402.1	1037.0											1.0	Triticale.402	1A	145370879.0	145373211.0	3.459436	0.0	3.669718	4.017053	12.72883	0.0	0.0	Yes		A
Triticale.403	Triticale.403.1	1457.0											1.0	Triticale.403	1A	146947225.0	146952752.0	8.122963	0.255641	0.0	0.0	0.0	0.0	0.0	Yes	TraesCS1A02G124400.2	A
Triticale.405	Triticale.405.1	1619.0											1.0	Triticale.405	1A	147353059.0	147357065.0	49.427822	52.161786	39.316896	2.491901	4.644272	9.294401	21.982075	Yes	TraesCS1A02G124600.1	A
Triticale.404	Triticale.404.1	815.0											1.0	Triticale.404	1A	147726841.0	147727754.0	2.65695	0.0	2.582802	3.485622	2.717386	22.619359	2.550777	Yes		A
Triticale.406	Triticale.406.1	2036.0											1.0	Triticale.406	1A	148267040.0	148271421.0	7.907799000000002	3.915955	8.890864	5.8784160000000005	25.372121	0.0	21.799925	Yes	TraesCS1A02G125000.1	A
Triticale.407	Triticale.407.1	868.0											1.0	Triticale.407	1A	148608794.0	148610939.0	84.129375	108.697247	153.956285	494.918087	81.638545	639.803585	1205.828275	Yes	TraesCS1A02G125100.1	A
Triticale.408	Triticale.408.1	1289.0											1.0	Triticale.408	1A	150006616.0	150007904.0	22.9698	0.430678	1.585983	0.0	0.0	0.0	0.0	Yes		A
Triticale.410	Triticale.410.1	1219.0											1.0	Triticale.410	1A	150449763.0	150457057.0	91.298672	13.242556	4439-10-01	2.551431	23.857592	20.987571	2.579739	Yes	TraesCS1A02G125800.1	A
Triticale.409	Triticale.409.1	1000.0											1.0	Triticale.409	1A	150890798.0	150895231.0	2.026497	6.124775	8.223576	4.868206	13.523895	0.0	6.09946	Yes	TraesCS1A02G126000.1	A
Triticale.411	Triticale.411.1	2487.0											1.0	Triticale.411	1A	151771143.0	151777139.0	7.846806	14.113	5.235819	11.601472	4.137561	8.890305999999997	2.405862	Yes		A
Triticale.412	Triticale.412.1	1214.0											1.0	Triticale.412	1A	154007784.0	154015107.0	18.368186	62.524952	50.327823	6.680147	20.519392	54.222523	24.073889	Yes	TraesCS1A02G127000.1	A
Triticale.413	Triticale.413.1	744.0											1.0	Triticale.413	1A	155143266.0	155144107.0	9.427909	0.0	1.383815	1.551595	0.0	0.0	0.0	Yes	TraesCS1A02G127800.1	A
Triticale.414	Triticale.414.1	1254.0											1.0	Triticale.414	1A	155840661.0	155858856.0	1.282193	0.0	0.358516	0.939601	9.218102	0.0	0.0	Yes	TraesCS1A02G128100.1	A
Triticale.415	Triticale.415.1	864.0											1.0	Triticale.415	1A	157311909.0	157314690.0	3.716488	2.164642	0.0	6.682456	0.0	0.0	5.27635	Yes		A
Triticale.420	Triticale.420.1	1873.0											1.0	Triticale.420	1A	157829137.0	157834887.0	8.449653	2.055752	0.76381	11.763084	7.1195070000000005	0.0	11.031602	Yes	TraesCS1A02G128600.1	A
Triticale.417	Triticale.417.1	848.0									Triticale.417.1	Triticale.417.1	1.0	Triticale.417	1A	157887060.0	157888436.0	0.487024	0.0	0.46624	2.923691	16.147579	5.67699	0.0	No		A
Triticale.416	Triticale.416.1	343.0									Triticale.416.1	Triticale.416.1	1.0	Triticale.416	1A	157890544.0	157890886.0	0.0	0.0	0.0	0.0	0.0	24.45661	0.0	No		A
Triticale.418	Triticale.418.1	413.0									Triticale.418.1	Triticale.418.1	1.0	Triticale.418	1A	161066045.0	161066457.0	0.0	0.0	0.0	0.0	0.0	0.0	9.249584	No		A
Triticale.419	Triticale.419.1	863.0											1.0	Triticale.419	1A	163382073.0	163383979.0	72.548417	9.495142	19.671743	13.955366	0.0	36.643181	56.382963	Yes	TraesCS1A02G129100.1	A
Triticale.421	Triticale.421.1	1567.0											1.0	Triticale.421	1A	163392857.0	163397306.0	2.641575	22.177326	14.915143	9.930572	11.792595	21.716732	24.890093	Yes	TraesCS1A02G129200.1	A
Triticale.423	Triticale.423.1	2737.0											1.0	Triticale.423	1A	165171900.0	165178777.0	11.889055	1.230556	8.736647999999999	0.0	0.0	5.345135	7.545354	Yes		A
Triticale.422	Triticale.422.1	1961.0											1.0	Triticale.422	1A	166315708.0	166322599.0	6.278897	18.421169	20.679593	21.541769	19.168782	4.387982	15.102575	Yes	TraesCS1A02G129500.1	A
Triticale.425	Triticale.425.2	1605.0											2.0	Triticale.425	1A	172185038.0	172193692.0	10.148717	20.137476	15.075742000000002	10.525189	0.0	0.0	7.603858	Yes	TraesCS1A02G131200.3	A
Triticale.425	Triticale.425.1	1618.0											2.0	Triticale.425	1A	172185038.0	172193692.0	10.148717	20.137476	15.075742000000002	10.525189	0.0	0.0	7.603858	Yes	TraesCS1A02G131200.2	A
Triticale.424	Triticale.424.1	431.0									Triticale.424.1	Triticale.424.1	1.0	Triticale.424	1A	173982112.0	173983291.0	5.385676	0.651358	1.489021	1.538987	0.0	37.555176	13.50305	No		A
Triticale.426	Triticale.426.1	551.0											1.0	Triticale.426	1A	174040090.0	174042531.0	12.444056	5.182563	6.514387	11.614213	4.267717	39.107229	35.220352	No		A
Triticale.428	Triticale.428.1	1199.0											2.0	Triticale.428	1A	175173219.0	175178988.0	0.209874	0.0	0.0	0.0	0.0	16.71886	0.0	Yes	TraesCS1A02G131500.1	A
Triticale.428	Triticale.428.2	1194.0											2.0	Triticale.428	1A	175173219.0	175178988.0	0.209874	0.0	0.0	0.0	0.0	16.71886	0.0	Yes	TraesCS1A02G131500.2	A
Triticale.429	Triticale.429.1	1129.0											1.0	Triticale.429	1A	175173264.0	175178953.0	21.733116	39.748219	46.56367	73.973952	33.684069	57.273529	60.783175	Yes		A
Triticale.427	Triticale.427.1	324.0									Triticale.427.1	Triticale.427.1	1.0	Triticale.427	1A	176413139.0	176413633.0	0.915452	0.0	0.0	0.0	8.874908999999997	0.0	0.0	No		A
Triticale.430	Triticale.430.1	1136.0											1.0	Triticale.430	1A	176458690.0	176462571.0	2.197843	3.66582	0.226242	3.3877870000000003	0.0	0.0	9.275417	Yes		A
Triticale.431	Triticale.431.1	1205.0											1.0	Triticale.431	1A	177464840.0	177472851.0	1.871803	24.309504	23.793731	17.569423999999998	0.750104	49.711393	15.399934	Yes		A
Triticale.432	Triticale.432.1	1776.0											1.0	Triticale.432	1A	177472970.0	177474850.0	0.885777	8.333272000000001	5.003914	12.552445	8.556644	0.0	0.0	No		A
Triticale.434	Triticale.434.1	2626.0											3.0	Triticale.434	1A	177475961.0	177482840.0	8.004645	24.419976	27.564843	16.209029	3.900172	44.441669	16.902	No		A
Triticale.434	Triticale.434.2	2510.0											3.0	Triticale.434	1A	177475961.0	177482840.0	8.004645	24.419976	27.564843	16.209029	3.900172	44.441669	16.902	No		A
Triticale.434	Triticale.434.3	2319.0											3.0	Triticale.434	1A	177475961.0	177482840.0	8.004645	24.419976	27.564843	16.209029	3.900172	44.441669	16.902	No		A
Triticale.433	Triticale.433.1	611.0											1.0	Triticale.433	1A	177487772.0	177488759.0	0.655964	1.581607	6.183642	5.02894	10.641193	0.0	8.998292	No		A
Triticale.435	Triticale.435.1	881.0											1.0	Triticale.435	1A	179535484.0	179537296.0	60.144621	3.2951650000000003	4.213243	0.971607	0.0	0.0	20.057315	Yes		A
Triticale.436	Triticale.436.1	2626.0											1.0	Triticale.436	1A	185141231.0	185146180.0	14.237759	1.17416	2.678906	1.977221	10.686709	4.4348980000000005	34.47711	Yes	TraesCS1A02G133100.2	A
Triticale.437	Triticale.437.1	472.0											1.0	Triticale.437	1A	186717477.0	186718084.0	6.930333	78.068409	101.518055	48.361983	71.76621999999998	25.62048	0.0	Yes		A
Triticale.438	Triticale.438.1	2541.0											1.0	Triticale.438	1A	186988726.0	186996675.0	8.569180000000001	6.60777	6.512241	15.781873	11.60186	5.422765	10.328439	Yes	TraesCS1A02G133400.2	A
Triticale.440	Triticale.440.1	1336.0											1.0	Triticale.440	1A	188223373.0	188227644.0	12.534473	1.585159	2.941208	0.0	1.714292	10.022509	0.0	No		A
Triticale.439	Triticale.439.1	402.0											1.0	Triticale.439	1A	188743249.0	188743650.0	0.0	0.0	0.0	0.0	0.0	21.691854	0.0	No		A
Triticale.442	Triticale.442.1	3464.0											1.0	Triticale.442	1A	189709863.0	189721916.0	7.878889999999998	5.980339	2.687424	18.828036	6.425618	10.356541	12.439939	Yes	TraesCS1A02G133700.2	A
Triticale.441	Triticale.441.1	290.0									Triticale.441.1	Triticale.441.1	2.0	Triticale.441	1A	191561159.0	191561669.0	250.862684	84.714173	162.49025	192.999017	14.124479	97.415729	37.780421	No		A
Triticale.441	Triticale.441.2	288.0									Triticale.441.2	Triticale.441.2	2.0	Triticale.441	1A	191561159.0	191561669.0	250.862684	84.714173	162.49025	192.999017	14.124479	97.415729	37.780421	No		A
Triticale.444	Triticale.444.1	1644.0											1.0	Triticale.444	1A	191855651.0	191862555.0	5.5204330000000015	9.296273	3.399192	3.883263	1.206934	0.0	0.0	Yes		A
Triticale.443	Triticale.443.1	1045.0											1.0	Triticale.443	1A	193517363.0	193518407.0	13.434501999999998	0.952748	0.465768	0.0	0.0	8.510137	2.994139	Yes		A
Triticale.445	Triticale.445.1	1744.0											1.0	Triticale.445	1A	201744535.0	201747147.0	7.060159	19.503923	7.803350999999998	12.530513	20.638129	6.859597	2.659354	Yes	TraesCS1A02G134300.1	A
Triticale.446	Triticale.446.1	2479.0											1.0	Triticale.446	1A	203320881.0	203323745.0	2.827242	0.0	0.0	0.0	10.267247	0.0	0.0	No		A
Triticale.447	Triticale.447.1	278.0									Triticale.447.1	Triticale.447.1	1.0	Triticale.447	1A	204281582.0	204281859.0	0.0	11.748271	0.3136199999999999	0.0	0.0	0.0	0.0	No		A
Triticale.448	Triticale.448.1	1099.0									Triticale.448.1	Triticale.448.1	1.0	Triticale.448	1A	204414674.0	204416773.0	0.0	0.0	0.0	0.0	10.780334	0.0	0.0	No		A
Triticale.449	Triticale.449.1	2220.0											1.0	Triticale.449	1A	208209275.0	208211604.0	1.877255	3.240158	1.863768	3.285872	25.032443	0.0	1.086168	Yes		A
Triticale.450	Triticale.450.1	207.0	Triticale.450.1	LTR	Copia	sire	no	-	RT|sire	Triticale.450	Triticale.450.1	Triticale.450.1	1.0	Triticale.450	1A	209704866.0	209705072.0	0.0	13.222086	0.0	0.0	0.0	0.0	0.0	No		A
Triticale.451	Triticale.451.1	486.0	Triticale.451.1	LTR	Copia	retrofit	no	-	RNaseH|retrofit	Triticale.451	Triticale.451.1	Triticale.451.1	1.0	Triticale.451	1A	211991923.0	211992408.0	4.590777	12.478753	3.466241	0.0	12.225923	0.0	0.0	No		A
Triticale.452	Triticale.452.1	1396.0											2.0	Triticale.452	1A	212021773.0	212025958.0	4.057077	0.0	0.757328	3.032872	0.0	14.413432	7.937202	Yes	TraesCS1A02G136000.2	A
Triticale.452	Triticale.452.2	1318.0											2.0	Triticale.452	1A	212021773.0	212025958.0	4.057077	0.0	0.757328	3.032872	0.0	14.413432	7.937202	Yes	TraesCS1A02G136000.1	A
Triticale.453	Triticale.453.1	241.0									Triticale.453.1	Triticale.453.1	1.0	Triticale.453	1A	212155847.0	212156879.0	13.020051	2.195219	7.38796	5.228658	5.10279	0.0	0.0	No		A
Triticale.454	Triticale.454.1	1295.0											1.0	Triticale.454	1A	213253122.0	213256009.0	11.960074	0.367006	0.0	0.0	0.0	0.0	0.0	Yes		A
Triticale.457	Triticale.457.1	2642.0											1.0	Triticale.457	1A	213905525.0	213934168.0	5.282535	1.6022610000000002	3.463295	8.357951	1.419582	0.0	4.892907	Yes		A
Triticale.456	Triticale.456.1	1469.0											2.0	Triticale.456	1A	216335870.0	216338931.0	1.326474	6.977806	16.43305	5.252585	0.0	0.0	0.0	No		A
Triticale.456	Triticale.456.2	890.0									Triticale.456.2	Triticale.456.2	2.0	Triticale.456	1A	216335870.0	216338931.0	1.326474	6.977806	16.43305	5.252585	0.0	0.0	0.0	No		A
Triticale.455	Triticale.455.1	1525.0	Triticale.455.1	LTR	Gypsy	reina	no	+	INT|reina	Triticale.455			1.0	Triticale.455	1A	216411860.0	216413384.0	0.0	0.0	0.0	0.0	8.981474	0.0	0.0	No		A
Triticale.458	Triticale.458.1	568.0									Triticale.458.1	Triticale.458.1	1.0	Triticale.458	1A	219901049.0	219901616.0	0.0	3.065756	1.510947	0.0	0.0	22.102291	0.0	No		A
Triticale.459	Triticale.459.1	1410.0											1.0	Triticale.459	1A	223937889.0	223949190.0	9.639906	11.690995	10.031951	8.403613	0.947521	0.0	5.422294	Yes	TraesCS1A02G137700.2	A
Triticale.460	Triticale.460.1	549.0									Triticale.460.1	Triticale.460.1	1.0	Triticale.460	1A	229329250.0	229329798.0	0.0	0.0	0.0	0.0	0.0	0.0	9.495509	No		A
Triticale.461	Triticale.461.1	1100.0											1.0	Triticale.461	1A	230134281.0	230165788.0	2.202362	1.3055450000000002	4.164272	4.207073	0.0	0.0	9.631739	Yes		A
Triticale.462	Triticale.462.1	1882.0											1.0	Triticale.462	1A	232086427.0	232105328.0	4.956972	8.285371000000001	6.628311	10.994691	5.118448	0.0	0.0	Yes	TraesCS1A02G138500.1	A
Triticale.463	Triticale.463.1	1945.0											2.0	Triticale.463	1A	232333423.0	232344060.0	7.876817	15.504357	22.497001	18.114265	17.362068	27.641186	9.256496	Yes	TraesCS1A02G138600.1	A
Triticale.463	Triticale.463.2	1892.0											2.0	Triticale.463	1A	232333423.0	232344060.0	7.876817	15.504357	22.497001	18.114265	17.362068	27.641186	9.256496	Yes	TraesCS1A02G138600.5	A
Triticale.464	Triticale.464.1	1668.0											1.0	Triticale.464	1A	233920831.0	233925580.0	61.905536	55.62318199999999	56.672769	12.278519	9.228334	21.309062	16.784359	Yes	TraesCS1A02G138800.1	A
Triticale.465	Triticale.465.1	1519.0											1.0	Triticale.465	1A	234210119.0	234258109.0	3.704459	5.170159	1.40773	0.0	0.0	7.591007	7.9822570000000015	Yes	TraesCS1A02G139100.1	A
Triticale.466	Triticale.466.1	1394.0											1.0	Triticale.466	1A	234806287.0	234816413.0	14.133282	37.332857	55.185347	40.743811	10.529442	11.890562	21.514184	Yes	TraesCS1A02G139300.1	A
Triticale.467	Triticale.467.1	2011.0											1.0	Triticale.467	1A	235653016.0	235688968.0	3.872131	2.29219	1.055594	3.245808	2.441615	14.413432	4.20324	Yes	TraesCS1A02G139400.1	A
Triticale.468	Triticale.468.1	3343.0											1.0	Triticale.468	1A	236715757.0	236721723.0	8.265988	5.178428	1.190055	3.582195	8.636477000000001	0.0	1.7077490000000002	Yes	TraesCS1A02G139500.1	A
Triticale.469	Triticale.469.1	653.0											1.0	Triticale.469	1A	237228223.0	237229651.0	11.956363	0.0	0.0	0.221956	0.0	0.0	0.0	No		A
Triticale.470	Triticale.470.1	1340.0											1.0	Triticale.470	1A	237327511.0	237330121.0	6.190739	0.5441199999999999	3.771478	2.518279	0.0	0.0	0.0	Yes	TraesCS1A02G139600.1	A
Triticale.473	Triticale.473.1	1477.0											1.0	Triticale.473	1A	237744624.0	237746433.0	6807-05-01	0.0	0.0	0.0	0.273069	0.0	0.0	Yes	TraesCS1A02G139900.1	A
Triticale.472	Triticale.472.1	357.0											1.0	Triticale.472	1A	238108388.0	238108744.0	0.0	0.0	0.379071	0.0	0.0	14.413432	0.7833220000000001	Yes	TraesCS1A02G140300.1	A
Triticale.474	Triticale.474.1	415.0									Triticale.474.1	Triticale.474.1	1.0	Triticale.474	1A	238119887.0	238123844.0	0.0	0.0	0.377245	6.795951	0.0	0.0	0.0	No		A
Triticale.471	Triticale.471.1	1661.0									Triticale.471.1	Triticale.471.1	1.0	Triticale.471	1A	238148146.0	238149806.0	0.0	0.0	0.508243	6.8195770000000016	0.0	0.0	2.09021	No		A
Triticale.475	Triticale.475.1	1025.0											1.0	Triticale.475	1A	238656201.0	238671089.0	0.764638	5.2941410000000015	1.990033	7.717264	0.0	0.0	13.002984	Yes		A
Triticale.476	Triticale.476.1	1020.0											1.0	Triticale.476	1A	240148258.0	240149277.0	0.0	0.0	0.0	0.0	0.0	27.922493	0.0	No		A
Triticale.478	Triticale.478.1	1399.0											1.0	Triticale.478	1A	241317588.0	241321077.0	2.4039330000000003	6.365433	3.227933	1.322437	8.632064	0.0	14.169585	Yes		A
Triticale.479	Triticale.479.1	932.0											1.0	Triticale.479	1A	241677702.0	241679636.0	1.091708	3.427947	4.690399	8.397686	26.629523	0.0	0.0	Yes	TraesCS1A02G141900.1	A
Triticale.477	Triticale.477.1	406.0									Triticale.477.1	Triticale.477.1	1.0	Triticale.477	1A	241747800.0	241748205.0	0.0	15.430412	0.0	1.045771	0.0	0.0	0.0	No		A
Triticale.480	Triticale.480.1	293.0									Triticale.480.1	Triticale.480.1	1.0	Triticale.480	1A	241798741.0	241799033.0	0.0	0.0	0.0	0.0	0.0	0.0	9.094047	No		A
Triticale.482	Triticale.482.1	1499.0											2.0	Triticale.482	1A	243092990.0	243096010.0	2.209125	7.051817	2.742282	5.407975	14.970366	0.0	3.2946370000000003	No		A
Triticale.482	Triticale.482.2	965.0											2.0	Triticale.482	1A	243092990.0	243096010.0	2.209125	7.051817	2.742282	5.407975	14.970366	0.0	3.2946370000000003	No		A
Triticale.481	Triticale.481.1	2294.0											1.0	Triticale.481	1A	243160578.0	243163085.0	6.1334040000000005	4.443876	0.863239	3.961836	1.319405	0.0	2.645076	Yes		A
Triticale.483	Triticale.483.1	1452.0											1.0	Triticale.483	1A	243619556.0	243624661.0	5.594919	13.856494	16.09696	16.802547	1.695141	13.758269	14.219256	Yes	TraesCS1A02G142500.1	A
Triticale.485	Triticale.485.1	1017.0											1.0	Triticale.485	1A	243862629.0	243866339.0	10.200307	72.89079699999998	56.861831	25.345886	69.146597	19.657254	29.660662	Yes	TraesCS1A02G142600.2	A
Triticale.484	Triticale.484.1	286.0									Triticale.484.1	Triticale.484.1	1.0	Triticale.484	1A	244417139.0	244417424.0	0.0	13.128447	1.674011	3.076427	0.0	0.0	0.0	No		A
Triticale.486	Triticale.486.1	537.0											1.0	Triticale.486	1A	244501230.0	244502836.0	2.67605	0.0	0.379071	1.949651	0.0	14.413432	0.0	Yes		A
Triticale.487	Triticale.487.1	2286.0											1.0	Triticale.487	1A	245115393.0	245117678.0	11.731203	5.967351	2.266967	4.659701999999999	7.911057	3.007521	4.193843	Yes		A
Triticale.488	Triticale.488.1	2190.0											1.0	Triticale.488	1A	245520893.0	245526942.0	5.095162	3.698723	2.688292	11.221295	7.831958999999999	13.38672	8.459023	Yes		A
Triticale.491	Triticale.491.1	1482.0											1.0	Triticale.491	1A	246689961.0	246693114.0	9.937293	5.55697	2.011739	0.54077	5.486682	0.0	0.0	Yes	TraesCS1A02G143300.3	A
Triticale.489	Triticale.489.1	339.0									Triticale.489.1	Triticale.489.1	1.0	Triticale.489	1A	246892737.0	246893075.0	0.016613	0.0	0.0	0.0	0.0	0.0	5.27635	No		A
Triticale.492	Triticale.492.1	1904.0											1.0	Triticale.492	1A	247312040.0	247314396.0	0.222826	0.51585	0.0	6.401481	0.4908	0.0	0.0	Yes		A
Triticale.490	Triticale.490.1	608.0									Triticale.490.1	Triticale.490.1	1.0	Triticale.490	1A	247998870.0	247999477.0	0.0	0.0	8.977383999999997	0.0	0.0	0.0	0.0	No		A
Triticale.493	Triticale.493.1	1755.0											1.0	Triticale.493	1A	248421979.0	248427263.0	5.680436	5.993437	0.955563	2.172489	1.069041	0.0	0.0	Yes	TraesCS1A02G143500.1	A
Triticale.494	Triticale.494.1	999.0											1.0	Triticale.494	1A	248613886.0	248616991.0	5165-04-01	19.929203	11.140298	25.080569	5.929723	0.0	20.635334	Yes		A
Triticale.496	Triticale.496.1	1749.0											1.0	Triticale.496	1A	248877815.0	248881684.0	22.170182	3.496899	1.345498	0.0	0.414876	9.122737	13.566461	Yes		A
Triticale.495	Triticale.495.1	1332.0											1.0	Triticale.495	1A	249054116.0	249057038.0	0.575016	0.907762	0.8244520000000001	0.0	0.0	0.0	8.235385	Yes		A
Triticale.497	Triticale.497.1	892.0											1.0	Triticale.497	1A	249234163.0	249236806.0	1.850948	0.571825	1.600854	8.485612	3.829187	0.0	6.672335	No		A
Triticale.498	Triticale.498.1	1395.0											1.0	Triticale.498	1A	250192310.0	250198419.0	7.077724000000001	63.043779	44.326086	35.012432000000004	28.371170000000006	44.562814	36.09477	No		A
Triticale.499	Triticale.499.1	1293.0											1.0	Triticale.499	1A	251160894.0	251162358.0	3.682644	2.3088040000000003	0.775733	1.883184	17.030677999999998	0.0	0.0	No		A
Triticale.503	Triticale.503.1	2229.0											1.0	Triticale.503	1A	251334628.0	251341814.0	29.610778000000003	5.671151999999998	12.642857	24.31045	5.019554	0.0	68.464722	Yes	TraesCS1A02G145000.1	A
Triticale.500	Triticale.500.1	1426.0											1.0	Triticale.500	1A	251376253.0	251377963.0	119.518371	0.0	0.0	0.0	0.0	0.0	0.0	Yes	TraesCS1A02G145300.1	A
Triticale.502	Triticale.502.1	1517.0											1.0	Triticale.502	1A	252281927.0	252286168.0	3.875783	3.87791	3.888418	8.077268	6.725042	0.0	9.637949	Yes	TraesCS1A02G145800.1	A
Triticale.501	Triticale.501.1	375.0											1.0	Triticale.501	1A	252321626.0	252322000.0	5.208758	0.0	0.119281	0.0	0.0	0.0	0.0	Yes	TraesCS1A02G145900.1	A
Triticale.505	Triticale.505.1	2035.0											2.0	Triticale.505	1A	252502437.0	252517706.0	4.111974	0.0	1.88269	6.491291	17.114468	0.0	7.685061	Yes	TraesCS1A02G146200.1	A
Triticale.505	Triticale.505.2	1574.0											2.0	Triticale.505	1A	252502437.0	252517706.0	4.111974	0.0	1.88269	6.491291	17.114468	0.0	7.685061	Yes		A
Triticale.504	Triticale.504.1	648.0									Triticale.504.1	Triticale.504.1	2.0	Triticale.504	1A	253239016.0	253256561.0	0.738735	3.863183	2.978285	13.831165	0.0	0.0	17.72853	No		A
Triticale.504	Triticale.504.2	675.0									Triticale.504.2	Triticale.504.2	2.0	Triticale.504	1A	253239016.0	253256561.0	0.738735	3.863183	2.978285	13.831165	0.0	0.0	17.72853	No		A
Triticale.506	Triticale.506.1	940.0											1.0	Triticale.506	1A	253720397.0	253722229.0	194.265967	4.605169999999998	11.616926	12.409507	1.984431	22.080152	63.07483000000001	Yes	TraesCS1A02G147000.1	A
Triticale.507	Triticale.507.1	2299.0											1.0	Triticale.507	1A	253899578.0	253903108.0	1.308118	2.66548	1.119736	0.761718	12.304639	0.0	0.0	No		A
Triticale.508	Triticale.508.1	1040.0											1.0	Triticale.508	1A	254380727.0	254382390.0	1.079422	0.454712	0.322211	0.0	0.0	14.413432	3.033901	Yes		A
Triticale.509	Triticale.509.1	1439.0											2.0	Triticale.509	1A	254956212.0	254960670.0	1.392613	2.8475080000000004	1.3982709999999998	13.240456	12.186866	0.0	1.675674	No		A
Triticale.509	Triticale.509.2	1419.0											2.0	Triticale.509	1A	254956212.0	254960670.0	1.392613	2.8475080000000004	1.3982709999999998	13.240456	12.186866	0.0	1.675674	No		A
Triticale.510	Triticale.510.1	1545.0											2.0	Triticale.510	1A	255475178.0	255478556.0	0.0	11.602342	14.728932	16.726209	27.781022	0.0	12.166872	No		A
Triticale.510	Triticale.510.2	1350.0											2.0	Triticale.510	1A	255475178.0	255478556.0	0.0	11.602342	14.728932	16.726209	27.781022	0.0	12.166872	No		A
Triticale.511	Triticale.511.1	645.0											1.0	Triticale.511	1A	255898222.0	255900059.0	84.658399	2.598005	7.346346	0.0	0.0	0.0	13.800314000000002	Yes	TraesCS1A02G148400.1	A
Triticale.512	Triticale.512.1	328.0									Triticale.512.1	Triticale.512.1	1.0	Triticale.512	1A	256048100.0	256048427.0	2.6871080000000003	1.581607	2.940115	11.46818	0.0	0.0	0.0	No		A
Triticale.513	Triticale.513.1	1161.0											1.0	Triticale.513	1A	256819205.0	256822875.0	34.526298	5.062233999999999	3.983352	2.611333	2.479821	19.900712	26.268133	Yes	TraesCS1A02G149200.2	A
Triticale.514	Triticale.514.1	435.0									Triticale.514.1	Triticale.514.1	1.0	Triticale.514	1A	257238450.0	257239687.0	2.541847	5.753779	9.860214	10.615054	4.5613800000000015	0.0	4.779038	No		A
Triticale.515	Triticale.515.1	679.0											1.0	Triticale.515	1A	258180031.0	258181487.0	1.797078	3.082853	1.478323	3.355053	1.800545	14.413432	0.0	Yes	TraesCS1A02G150500.1	A
Triticale.516	Triticale.516.1	1943.0											1.0	Triticale.516	1A	258738276.0	258740400.0	16.137825	10.023223	7.778866000000002	6.251049	7.352303	0.0	15.04425	Yes		A
Triticale.518	Triticale.518.1	2260.0											1.0	Triticale.518	1A	258870778.0	258881439.0	27.340646000000003	0.0	1.128996	1.433534	0.0	8.131467	0.490278	Yes	TraesCS1A02G150900.1	A
Triticale.517	Triticale.517.1	400.0									Triticale.517.1	Triticale.517.1	1.0	Triticale.517	1A	259052346.0	259053288.0	0.0	0.0	0.0	3.410302	0.0	14.413432	0.0	Yes		A
Triticale.519	Triticale.519.1	498.0									Triticale.519.1	Triticale.519.1	1.0	Triticale.519	1A	259378935.0	259380815.0	6.029458	1.438691	1.376988	0.0	3.2901519999999995	0.0	5.043256	No		A
Triticale.520	Triticale.520.1	870.0											1.0	Triticale.520	1A	259998842.0	260000708.0	1.774762	3.653149	6.174071	6.57365	0.0	8.813727	2.201509	No		A
Triticale.521	Triticale.521.1	1533.0											1.0	Triticale.521	1A	260836885.0	260840054.0	1.932973	5.2421050000000005	0.645139	1.623953	12.01068	0.0	0.0	Yes	TraesCS1A02G151600.1	A
Triticale.527	Triticale.527.1	4234.0											1.0	Triticale.527	1A	262823436.0	262841642.0	5.07422	2.316379	3.104017	6.75657	4.623412999999998	6.641622999999999	1.800739	Yes		A
Triticale.522	Triticale.522.1	1012.0											1.0	Triticale.522	1A	262842398.0	262843909.0	1.084244	11.215034	0.71207	3.947794	2.905424	0.0	0.0	No		A
Triticale.523	Triticale.523.1	2682.0											1.0	Triticale.523	1A	265645642.0	265650647.0	7.437627	0.0	0.043391	0.0	0.218186	0.0	0.0	Yes		A
Triticale.525	Triticale.525.1	1495.0											1.0	Triticale.525	1A	267141927.0	267145892.0	11.96923	1.805889	0.871484	1.968622	0.0	0.0	2.167007	Yes	TraesCS1A02G153300.1	A
Triticale.529	Triticale.529.1	1090.0											1.0	Triticale.529	1A	267177629.0	267181184.0	5.989134	17.510136	12.01726	8.751022	14.942874	32.172365	8.277574000000001	Yes	TraesCS1A02G153600.1	A
Triticale.526	Triticale.526.1	403.0									Triticale.526.1	Triticale.526.1	1.0	Triticale.526	1A	267183151.0	267184144.0	0.549668	0.498422	0.0	0.0	8.917836999999997	0.0	0.0	No		A
Triticale.530	Triticale.530.1	2765.0											1.0	Triticale.530	1A	268116267.0	268124215.0	0.0	1.885917	2.05055	9.274418	1.43132	0.0	2.589516	Yes		A
Triticale.531	Triticale.531.1	2657.0											1.0	Triticale.531	1A	268930984.0	268937108.0	11.314756	3.4807870000000003	3.821959	1.320095	0.0	0.0	4.174215	Yes		A
Triticale.532	Triticale.532.1	1514.0											1.0	Triticale.532	1A	271882554.0	271891545.0	1.680726	7.266097	14.544675	9.745488	9.401129	0.0	0.0	Yes	TraesCS1A02G155000.1	A
Triticale.533	Triticale.533.1	1650.0											1.0	Triticale.533	1A	272610331.0	272614124.0	84.189214	372.768578	473.885701	109.321873	80.90122099999998	507.151901	357.458323	Yes		A
Triticale.534	Triticale.534.1	808.0									Triticale.534.1	Triticale.534.1	1.0	Triticale.534	1A	274969225.0	274970943.0	6.178912	9.047264	9.797214	14.388267	12.695181	49.786991	38.991444	No		A
Triticale.535	Triticale.535.1	824.0											1.0	Triticale.535	1A	276967792.0	276972330.0	0.68005	4.792807	12.444492	11.255238	5.661667	0.0	7.0180570000000015	Yes	TraesCS1A02G156300.1	A
Triticale.538	Triticale.538.1	2898.0											1.0	Triticale.538	1A	278141371.0	278146157.0	16.671167999999998	15.666263	11.967434	4.777129	4.078874	0.0	4.881262	Yes		A
Triticale.536	Triticale.536.1	748.0											1.0	Triticale.536	1A	278363896.0	278364643.0	0.843259	0.0	0.0	1.6983119999999998	8.969025	0.0	0.0	No		A
Triticale.537	Triticale.537.1	235.0									Triticale.537.1	Triticale.537.1	1.0	Triticale.537	1A	278491029.0	278491263.0	4.557337	34.176182	45.785378	55.84188	71.60806600000002	84.885917	29.861896999999995	No		A
Triticale.539	Triticale.539.1	306.0									Triticale.539.1	Triticale.539.1	1.0	Triticale.539	1A	278880727.0	278881032.0	0.0	7.03712	0.0	0.0	0.0	0.0	0.0	No		A
Triticale.540	Triticale.540.1	2413.0											1.0	Triticale.540	1A	279734231.0	279742708.0	5.291012	1.282721	0.441439	1.44369	7.8894160000000015	0.0	3.03942	Yes		A
Triticale.541	Triticale.541.1	1194.0											1.0	Triticale.541	1A	279826082.0	279831142.0	0.90168	2.357178	1.825511	1.947929	3.085357	14.413432	0.0	Yes	TraesCS1A02G157600.1	A
Triticale.543	Triticale.543.1	572.0											1.0	Triticale.543	1A	279841008.0	279841901.0	0.8139149999999999	1.501421	0.8754430000000001	8.036866	3.223354	0.0	6.613889	No		A
Triticale.542	Triticale.542.1	1016.0											1.0	Triticale.542	1A	280603269.0	280604284.0	11.820612	0.282541	0.0	0.0	0.0	0.0	0.0	Yes		A
Triticale.544	Triticale.544.1	239.0									Triticale.544.1	Triticale.544.1	1.0	Triticale.544	1A	280635410.0	280637009.0	0.0	10.118317	0.0	0.0	0.0	0.0	0.0	No		A
Triticale.545	Triticale.545.1	934.0									Triticale.545.1	Triticale.545.1	1.0	Triticale.545	1A	281356555.0	281367641.0	0.938628	2.827928	0.758143	10.097635	1.77934	0.0	1.48009	No		A
Triticale.546	Triticale.546.1	670.0											1.0	Triticale.546	1A	281656689.0	281659441.0	19.866686	5.383367	7.595573	9.215451	9.290275	0.0	6.489124	Yes	TraesCS1A02G158300.1	A
Triticale.548	Triticale.548.1	1843.0											1.0	Triticale.548	1A	282545207.0	282551529.0	8.22356	0.69855	1.821929	1.924425	11.647368	2.737226	4.2771940000000015	Yes	TraesCS1A02G158500.1	A
Triticale.547	Triticale.547.1	1157.0											1.0	Triticale.547	1A	282553058.0	282554811.0	6.726155	0.714252	0.428544	0.0	0.0	0.0	0.0	Yes	TraesCS1A02G158600.2	A
Triticale.550	Triticale.550.1	3269.0											1.0	Triticale.550	1A	282695074.0	282702388.0	8.708363	5.5111930000000005	2.5214220000000003	9.103702	4.769324	15.017484	9.831217	Yes	TraesCS1A02G158700.1	A
Triticale.549	Triticale.549.1	676.0											1.0	Triticale.549	1A	284336597.0	284337272.0	285.871824	0.0	2.857616	0.0	0.0	0.0	9.147755	Yes		A
Triticale.553	Triticale.553.1	845.0											1.0	Triticale.553	1A	284912309.0	284914960.0	42.242689	2.936736	1.760775	3.930929	5.676512000000002	0.0	10.277955	Yes		A
Triticale.552	Triticale.552.1	898.0											1.0	Triticale.552	1A	286915745.0	286916642.0	15.203051	7.107547	5.794559	4.452761	4.579561	0.0	3.507775	Yes	TraesCS1A02G159700.1	A
Triticale.554	Triticale.554.1	972.0											1.0	Triticale.554	1A	287689108.0	287690079.0	3.321893	0.378317	3.854283	2.991031	1.644942	35.173515	3.398143	Yes		A
Triticale.555	Triticale.555.1	1996.0											1.0	Triticale.555	1A	287691583.0	287699231.0	1.499641	3.91955	0.0	2.435564	12.904208	0.0	0.0	Yes		A
Triticale.556	Triticale.556.1	1456.0											1.0	Triticale.556	1A	287705561.0	287707922.0	0.0	9.143668	3.799306	0.0	0.0	2.346146	0.0	No		A
Triticale.557	Triticale.557.1	392.0											1.0	Triticale.557	1A	288513897.0	288515894.0	1.549214	1.849916	3.079955	2.009641	1.800545	14.413432	4.280302	Yes		A
Triticale.558	Triticale.558.1	972.0											1.0	Triticale.558	1A	288518571.0	288520644.0	1.413736	1.581607	1.516286	2.17705	1.800545	14.413432	2.687029	Yes		A
Triticale.559	Triticale.559.1	728.0											1.0	Triticale.559	1A	288864971.0	288867562.0	0.0	0.0	1.092955	4.815646	5.401635	0.0	7.023053999999999	Yes		A
Triticale.560	Triticale.560.1	1643.0											1.0	Triticale.560	1A	289325304.0	289326946.0	0.938056	0.0	0.0	0.0	15.066278	0.0	0.0	No		A
Triticale.562	Triticale.562.1	1440.0											1.0	Triticale.562	1A	290123260.0	290127419.0	38.698838	69.81972900000001	48.542203	20.076967	27.203238	12.902025	0.0	Yes	TraesCS1A02G161200.1	A
Triticale.561	Triticale.561.1	833.0											1.0	Triticale.561	1A	290554420.0	290556043.0	60.060903	25.929438	34.947837	46.534449	17.583955	21.334646	47.480811	Yes	TraesCS1A02G161900.1	A
Triticale.564	Triticale.564.1	1604.0											1.0	Triticale.564	1A	291248717.0	291256507.0	0.852606	8.128910000000001	5.656294	6.129614	0.0	3.720179	2.7960700000000003	Yes	TraesCS1A02G162300.2	A
Triticale.563	Triticale.563.1	1022.0											1.0	Triticale.563	1A	291561111.0	291565359.0	6.724688	0.360582	7.312147	0.97604	0.0	14.357018	3.273194	Yes	TraesCS1A02G162400.1	A
Triticale.566	Triticale.566.1	806.0											1.0	Triticale.566	1A	291974500.0	291975627.0	0.0	0.0	0.371076	0.0	0.0	19.84976	0.0	Yes	TraesCS1A02G162500.1	A
Triticale.565	Triticale.565.1	396.0									Triticale.565.1	Triticale.565.1	1.0	Triticale.565	1A	292173234.0	292173629.0	6.947267	2.10881	4.359321	2.488832	0.0	0.0	3.677457	No		A
Triticale.567	Triticale.567.1	3330.0											1.0	Triticale.567	1A	292501099.0	292522286.0	0.0	0.164573	0.821435	8.200086	13.364045999999998	1.004184	0.545063	No		A
Triticale.568	Triticale.568.1	1103.0											1.0	Triticale.568	1A	292524942.0	292527430.0	0.0	3.02054	0.7478319999999999	3.0516490000000003	15.502971	33.62263	0.0	No		A
Triticale.569	Triticale.569.1	1003.0											1.0	Triticale.569	1A	292878943.0	292881794.0	15.134084	0.946126	2.600967	0.542316	0.0	0.0	4.72925	Yes	TraesCS1A02G163200.1	A
Triticale.570	Triticale.570.1	3122.0											1.0	Triticale.570	1A	293713021.0	293722774.0	1.409144	0.442769	0.0	6.786196	0.0	0.0	1.3655620000000002	Yes		A
Triticale.571	Triticale.571.1	1579.0											2.0	Triticale.571	1A	294037823.0	294042455.0	51.180663	229.01106600000003	178.675205	55.53235	57.27192900000001	122.792579	0.0	Yes		A
Triticale.571	Triticale.571.2	1318.0											2.0	Triticale.571	1A	294037823.0	294042455.0	51.180663	229.01106600000003	178.675205	55.53235	57.27192900000001	122.792579	0.0	Yes	TraesCS1A02G163700.2	A
Triticale.573	Triticale.573.1	2538.0											1.0	Triticale.573	1A	295228211.0	295232810.0	2.255591	2.150251	0.934087	11.259506	11.226093	3.15755	2.457307	Yes	TraesCS1A02G163900.1	A
Triticale.572	Triticale.572.1	2973.0											1.0	Triticale.572	1A	295458049.0	295464498.0	9.149805	2.4330580000000004	1.425757	0.0	0.0	0.0	1.721515	Yes		A
Triticale.574	Triticale.574.1	1815.0											2.0	Triticale.574	1A	295571813.0	295576403.0	0.687292	3.519704	9.56357	10.96507	2.748932	6.4880330000000015	6.397922	No		A
Triticale.574	Triticale.574.2	797.0									Triticale.574.2	Triticale.574.2	2.0	Triticale.574	1A	295571813.0	295576403.0	0.687292	3.519704	9.56357	10.96507	2.748932	6.4880330000000015	6.397922	No		A
Triticale.575	Triticale.575.1	3035.0											1.0	Triticale.575	1A	295584847.0	295590780.0	2.691248	7.597187	2.0817080000000003	18.869027	0.0	1.7666540000000002	4.13937	Yes		A
Triticale.576	Triticale.576.1	648.0	Triticale.576.1	LTR	Gypsy	del	no	+	RT|del	Triticale.576			1.0	Triticale.576	1A	296123434.0	296124081.0	0.0	0.0	6.43076	0.0	0.0	0.0	0.0	No		A
Triticale.578	Triticale.578.1	1393.0											1.0	Triticale.578	1A	296212283.0	296215214.0	5.773268	1.434573	3.029578	6.545184	0.0	0.0	5.302862999999999	Yes	TraesCS1A02G164400.1	A
Triticale.577	Triticale.577.1	1372.0											1.0	Triticale.577	1A	297067280.0	297068651.0	0.0	0.0	0.0	0.0	0.0	0.0	9.133625	No		A
Triticale.579	Triticale.579.1	1137.0											1.0	Triticale.579	1A	297377177.0	297381017.0	1.287001	0.0	6.712265	1.705151	5.392134	0.0	4.608105	Yes	TraesCS1A02G164600.1	A
Triticale.582	Triticale.582.1	1561.0											1.0	Triticale.582	1A	297744935.0	297751007.0	27.335051	6.002205	11.071994	1.084699	0.456769	4.930662	15.129368	Yes	TraesCS1A02G164800.2	A
Triticale.580	Triticale.580.1	1075.0											1.0	Triticale.580	1A	298034426.0	298037678.0	4.288874	0.0	2.689115	0.0	1.70005	0.0	7.548863000000001	Yes		A
Triticale.581	Triticale.581.1	322.0									Triticale.581.1	Triticale.581.1	1.0	Triticale.581	1A	298105704.0	298106025.0	0.0	0.0	0.373185	4.97777	1.739035	0.0	23.170056	Yes		A
Triticale.583	Triticale.583.1	973.0											1.0	Triticale.583	1A	298108473.0	298116242.0	0.0	0.38768	0.5539970000000001	0.0	0.0	0.0	19.771401	Yes		A
Triticale.584	Triticale.584.1	723.0											1.0	Triticale.584	1A	298563269.0	298566731.0	1.717571	0.7503340000000001	0.0	0.0	0.0	14.413432	0.0	Yes		A
Triticale.586	Triticale.586.1	3693.0											1.0	Triticale.586	1A	298601923.0	298610934.0	10.175202	0.0	0.8937379999999999	0.0	0.290583	0.0	0.0	Yes	TraesCS1A02G165800.1	A
Triticale.585	Triticale.585.1	602.0											1.0	Triticale.585	1A	299424964.0	299425565.0	0.0	0.0	5.041901999999999	3.69355	3.463507	0.0	43.54303400000001	Yes		A
Triticale.587	Triticale.587.1	804.0											1.0	Triticale.587	1A	299642472.0	299653455.0	1.972986	3.818283	0.0	0.0	0.0	14.413432	0.0	Yes		A
Triticale.588	Triticale.588.1	1047.0											1.0	Triticale.588	1A	300060670.0	300061716.0	0.0	7.074936999999999	0.0	0.0	0.0	0.0	0.0	No		A
Triticale.589	Triticale.589.1	566.0									Triticale.589.1	Triticale.589.1	1.0	Triticale.589	1A	300100764.0	300102768.0	21.034548	0.958465	0.33219	6.573567999999999	0.0	8.581844	3.933957	Yes	TraesCS1A02G167200.1	A
Triticale.590	Triticale.590.1	1370.0											1.0	Triticale.590	1A	301196754.0	301200037.0	7.063688000000001	0.397134	0.675135	0.0	0.0	0.0	0.0	Yes	TraesCS1A02G168600.1	A
Triticale.591	Triticale.591.1	2063.0											1.0	Triticale.591	1A	301776169.0	301779892.0	23.481617	11.829472	5.6673290000000005	3.548334	8.083688	1.620906	36.42804	Yes	TraesCS1A02G168900.1	A
Triticale.592	Triticale.592.1	2729.0											1.0	Triticale.592	1A	301781001.0	301784189.0	1.414992	2.570039	2.52279	6.480699	4.802553	0.0	0.0	Yes	TraesCS1A02G169000.1	A
Triticale.593	Triticale.593.1	1227.0											1.0	Triticale.593	1A	301857454.0	301864352.0	16.392708	30.903863	35.921576	87.786785	34.213295	26.324778	120.771214	Yes		A
Triticale.595	Triticale.595.1	1414.0											1.0	Triticale.595	1A	301895976.0	301899127.0	6.401123	4.481408	1.570975	2.263486	24.29972	0.0	8.063782000000002	Yes	TraesCS1A02G169300.2	A
Triticale.594	Triticale.594.1	1141.0									Triticale.594.1	Triticale.594.1	1.0	Triticale.594	1A	302584949.0	302586089.0	0.0	0.0	0.0	10.193544	0.0	0.0	0.0	No		A
Triticale.596	Triticale.596.1	1660.0											1.0	Triticale.596	1A	303727691.0	303730110.0	16.777120999999998	0.0	0.152542	0.0	0.0	0.0	2.485604	Yes	TraesCS1A02G170000.1	A
Triticale.597	Triticale.597.1	1386.0											1.0	Triticale.597	1A	303849555.0	303852175.0	17.575906	0.0	0.0	0.0	0.0	0.0	0.0	Yes	TraesCS1A02G170100.1	A
Triticale.598	Triticale.598.1	2008.0											1.0	Triticale.598	1A	303853461.0	303858626.0	5.385423	14.557011	7.9182130000000015	11.946247	12.569743	15.892106	6.314276	Yes	TraesCS1A02G170200.1	A
Triticale.600	Triticale.600.1	1862.0											1.0	Triticale.600	1A	304036922.0	304040294.0	8.461260000000001	7.992553999999998	4.683629	3.353524	8.423496	14.94755	6.030113	Yes		A
Triticale.599	Triticale.599.1	3106.0											1.0	Triticale.599	1A	304996294.0	305003693.0	5.013771	9.545913	3.149734	8.616887	31.16578	9.155729	7.826188	Yes		A
Triticale.601	Triticale.601.1	610.0											1.0	Triticale.601	1A	305004126.0	305004870.0	3.754511	3.135991	5931-03-01	1.311009	8.987967	0.0	4.125931	Yes		A
Triticale.602	Triticale.602.1	1200.0											1.0	Triticale.602	1A	305333684.0	305335502.0	0.901083	0.0	0.0	7.253997	0.0	0.0	10.126196	Yes	TraesCS1A02G170800.1	A
Triticale.604	Triticale.604.1	1355.0											1.0	Triticale.604	1A	305363883.0	305368036.0	10.554885	0.0	0.522587	0.0	0.0	0.0	0.0	Yes	TraesCS1A02G170900.1	A
Triticale.603	Triticale.603.1	1729.0											1.0	Triticale.603	1A	305606261.0	305608388.0	61.750189	0.0	0.91819	0.0	0.0	3.676304	0.0	Yes	TraesCS1A02G171000.2	A
Triticale.605	Triticale.605.1	1287.0											1.0	Triticale.605	1A	306112204.0	306115271.0	1.29745	1.390512	0.755787	0.0	21.92412	0.0	0.0	Yes		A
Triticale.606	Triticale.606.1	836.0											1.0	Triticale.606	1A	306550310.0	306553305.0	4.879517	0.0	0.0	0.0	0.0	8.051516000000001	0.0	Yes	TraesCS1A02G171400.1	A
Triticale.607	Triticale.607.2	975.0									Triticale.607.2	Triticale.607.2	2.0	Triticale.607	1A	308301829.0	308303159.0	1.177692	6.433751999999999	5.962068	30.672114	3.973105	0.0	7.409086999999999	No		A
Triticale.607	Triticale.607.1	1331.0									Triticale.607.1	Triticale.607.1	2.0	Triticale.607	1A	308301829.0	308303159.0	1.177692	6.433751999999999	5.962068	30.672114	3.973105	0.0	7.409086999999999	No		A
Triticale.609	Triticale.609.1	912.0											1.0	Triticale.609	1A	308791201.0	308794302.0	2.232328	1.459345	1.142202	9.196972	0.0	0.0	0.0	No		A
Triticale.608	Triticale.608.1	2319.0											1.0	Triticale.608	1A	308812574.0	308816474.0	11.728192	6.070331	5.514925	0.0	0.0	0.0	1.465274	Yes	TraesCS1A02G173100.2	A
Triticale.610	Triticale.610.1	1132.0											1.0	Triticale.610	1A	308950731.0	308953133.0	14.884546	0.840404	0.362328	0.0	0.0	0.0	0.0	Yes	TraesCS1A02G173200.3	A
Triticale.611	Triticale.611.1	1225.0											1.0	Triticale.611	1A	309401312.0	309403665.0	68.34205899999999	8.264382000000001	5.798401	5.303367	0.942162	10.707119	30.542525	Yes		A
Triticale.612	Triticale.612.1	1607.0											2.0	Triticale.612	1A	309457426.0	309462784.0	1.135464	10.424633	15.829656	4.4947230000000005	35.106867	0.0	21.490383	Yes		A
Triticale.612	Triticale.612.2	1426.0											2.0	Triticale.612	1A	309457426.0	309462784.0	1.135464	10.424633	15.829656	4.4947230000000005	35.106867	0.0	21.490383	Yes		A
Triticale.613	Triticale.613.1	632.0											1.0	Triticale.613	1A	309701752.0	309702528.0	5.563448	4.9562870000000006	1.539678	0.0	0.0	0.0	0.0	No		A
Triticale.614	Triticale.614.1	996.0											1.0	Triticale.614	1A	309909649.0	309911497.0	15.53919	19.567629	19.649297	37.67938400000001	46.356805	0.0	54.665316	Yes		A
Triticale.616	Triticale.616.1	2402.0											1.0	Triticale.616	1A	310246841.0	310255049.0	8.412871	4.128838	1.314914	0.0	0.0	0.0	1.256484	Yes	TraesCS1A02G174000.2	A
Triticale.615	Triticale.615.1	417.0											1.0	Triticale.615	1A	310699983.0	310701014.0	218.335602	463.422321	655.6744669999998	540.377472	48.826294	283.429584	222.429146	No		A
Triticale.617	Triticale.617.1	1166.0											1.0	Triticale.617	1A	311812455.0	311816565.0	8.655339	3.119809	5.288144	2.98767	1.6028870000000002	0.0	5.769593	Yes	TraesCS1A02G174500.1	A
Triticale.618	Triticale.618.1	1742.0											1.0	Triticale.618	1A	311846910.0	311852468.0	6.270809	3.566788	4.33125	6.321392	1.920443	0.0	3.00467	Yes	TraesCS1A02G174600.1	A
Triticale.621	Triticale.621.1	831.0											1.0	Triticale.621	1A	312776030.0	312777577.0	9.521818	4.34609	1.401789	1.393258	0.0	12.314721	10.089193	Yes		A
Triticale.619	Triticale.619.1	583.0											1.0	Triticale.619	1A	313161636.0	313162218.0	102.117216	0.0	0.600793	0.979804	0.0	0.0	0.0	Yes		A
Triticale.620	Triticale.620.1	378.0									Triticale.620.1	Triticale.620.1	1.0	Triticale.620	1A	313491454.0	313491831.0	0.871582	0.0	0.0	0.0	0.0	0.0	22.040621	Yes		A
Triticale.622	Triticale.622.1	604.0											1.0	Triticale.622	1A	313593088.0	313594445.0	2.334137	5.048575	5.171437999999998	0.0	10.284572	23.624667	28.321071000000003	No		A
Triticale.625	Triticale.625.1	1156.0											1.0	Triticale.625	1A	313744357.0	313748663.0	7.8354300000000014	0.352683	0.120387	0.0	0.0	5.560889	0.0	Yes	TraesCS1A02G175800.1	A
Triticale.626	Triticale.626.1	1165.0											2.0	Triticale.626	1A	313748654.0	313751697.0	0.0	6.771348	14.531872	10.326043	34.474312	0.0	7.0903220000000005	Yes		A
Triticale.626	Triticale.626.2	1216.0											2.0	Triticale.626	1A	313748654.0	313751697.0	0.0	6.771348	14.531872	10.326043	34.474312	0.0	7.0903220000000005	Yes		A
Triticale.623	Triticale.623.1	1928.0											1.0	Triticale.623	1A	315834400.0	315839468.0	3.43271	8.52534	6.731269999999999	18.571819	1.4550040000000002	0.0	5.5363370000000005	Yes		A
Triticale.624	Triticale.624.1	3064.0											1.0	Triticale.624	1A	317811553.0	317815433.0	14.756734	0.327007	1.076716	0.0	0.0	0.0	1.7427099999999998	Yes	TraesCS1A02G176700.2	A
Triticale.627	Triticale.627.1	1216.0											1.0	Triticale.627	1A	319077828.0	319079043.0	12.33647	0.6594369999999999	0.0	0.0	0.0	0.0	0.0	Yes	TraesCS1A02G176800.1	A
Triticale.628	Triticale.628.1	1928.0											1.0	Triticale.628	1A	320222676.0	320225208.0	4.61281	19.170017	26.707626	40.003832	4.889863	0.0	24.660366	Yes		A
Triticale.629	Triticale.629.1	753.0											1.0	Triticale.629	1A	320493039.0	320494891.0	1.877255	8.698841	1.296797	3.410302	0.0	14.413432	4.3023620000000005	Yes		A
Triticale.630	Triticale.630.1	1594.0											1.0	Triticale.630	1A	320891334.0	320895525.0	12.740369	2.563415	1.663253	9.125874	11.143273	10.461946	12.873101	Yes	TraesCS1A02G177700.1	A
Triticale.631	Triticale.631.1	1896.0											1.0	Triticale.631	1A	321875570.0	321880525.0	6.850101	3.337559	1.051843	1.911101	0.0	3.215651	2.963773	Yes	TraesCS1A02G178200.2	A
Triticale.633	Triticale.633.1	1930.0											1.0	Triticale.633	1A	321882666.0	321888083.0	12.712326	4.943548000000002	3.613945	3.442991	2.831427	0.0	8.056685	Yes	TraesCS1A02G178300.1	A
Triticale.632	Triticale.632.1	1462.0											1.0	Triticale.632	1A	323642100.0	323645469.0	37.044975	48.029157	32.570065	23.890775	54.762682	66.80260899999999	24.252441	Yes	TraesCS1A02G179000.2	A
Triticale.634	Triticale.634.1	937.0									Triticale.634.1	Triticale.634.1	3.0	Triticale.634	1A	324498865.0	324501933.0	2.564157	22.253613	27.751059	10.104777	28.788175	20.973417	20.917197	Yes		A
Triticale.634	Triticale.634.3	973.0									Triticale.634.3	Triticale.634.3	3.0	Triticale.634	1A	324498865.0	324501933.0	2.564157	22.253613	27.751059	10.104777	28.788175	20.973417	20.917197	Yes		A
Triticale.634	Triticale.634.2	2169.0											3.0	Triticale.634	1A	324498865.0	324501933.0	2.564157	22.253613	27.751059	10.104777	28.788175	20.973417	20.917197	Yes	TraesCS1A02G179600.1	A
Triticale.635	Triticale.635.1	1001.0											1.0	Triticale.635	1A	325036711.0	325039829.0	10.579957	11.618731	11.475148	2.773213	0.0	12.887136	3.009788	Yes	TraesCS1A02G180100.1	A
Triticale.636	Triticale.636.1	1594.0											1.0	Triticale.636	1A	325049787.0	325054523.0	9.326803	2.414085	0.295838	1.688035	0.0	0.0	12.469265	Yes	TraesCS1A02G180300.1	A
Triticale.638	Triticale.638.1	3002.0											1.0	Triticale.638	1A	326208137.0	326214542.0	0.907674	0.571633	2.013675	1.358668	3.361778	14.327009	2.662784	Yes		A
Triticale.637	Triticale.637.1	1725.0											1.0	Triticale.637	1A	327014865.0	327018031.0	6.424567	0.0	0.0	0.0	0.0	0.0	0.0	Yes	TraesCS1A02G181000.1	A
Triticale.639	Triticale.639.1	829.0											1.0	Triticale.639	1A	327271128.0	327271956.0	92.202904	0.4378510000000001	0.473268	0.933823	0.0	0.0	0.0	Yes	TraesCS1A02G181100.1	A
Triticale.641	Triticale.641.1	2257.0											1.0	Triticale.641	1A	327525812.0	327529130.0	8.134912	0.0	1.4329809999999998	2.399451	5676-01-01	9.834602	3.558091000000001	Yes	TraesCS1A02G181400.1	A
Triticale.642	Triticale.642.1	991.0											2.0	Triticale.642	1A	327529209.0	327531391.0	29.68262	49.027695	43.482711	98.172428	75.306587	10.959397	32.752345	Yes	TraesCS1A02G181500.1	A
Triticale.642	Triticale.642.2	1110.0											2.0	Triticale.642	1A	327529209.0	327531391.0	29.68262	49.027695	43.482711	98.172428	75.306587	10.959397	32.752345	Yes		A
Triticale.640	Triticale.640.1	666.0											1.0	Triticale.640	1A	327536385.0	327537699.0	0.0	0.0	2852-01-01	0.0	0.0	14.413432	0.0	Yes		A
Triticale.644	Triticale.644.1	1991.0											1.0	Triticale.644	1A	328247145.0	328253576.0	4.269318	7.812711	6.954847	1.345451	18.709935	7.203098	5.358503	Yes		A
Triticale.645	Triticale.645.1	1972.0											1.0	Triticale.645	1A	330082865.0	330086356.0	37.057232	12.427488	14.516782999999998	1.143972	0.0	13.302459	11.483822	Yes	TraesCS1A02G182400.1	A
Triticale.643	Triticale.643.1	1027.0											1.0	Triticale.643	1A	330087432.0	330088458.0	9.696107	0.0	0.074928	0.0	0.0	0.0	1.561842	Yes	TraesCS1A02G182500.1	A
Triticale.646	Triticale.646.1	750.0											1.0	Triticale.646	1A	330766277.0	330767763.0	8.267433	0.0	0.632796	5.115453	3.569881	0.0	7.696436999999999	Yes		A
Triticale.647	Triticale.647.1	364.0									Triticale.647.1	Triticale.647.1	1.0	Triticale.647	1A	332209184.0	332211126.0	2.8158830000000004	2.270302	2.728481	6.755022	0.0	0.0	5.189374	No		A
Triticale.649	Triticale.649.1	4451.0											1.0	Triticale.649	1A	333613201.0	333627221.0	1.038585	2.442412	1.992531	8.842957	1.606373	3.458445	0.395932	Yes	TraesCS1A02G183800.1	A
Triticale.648	Triticale.648.1	649.0											1.0	Triticale.648	1A	333908567.0	333909378.0	0.938628	7.0563080000000005	0.0	1.705151	0.0	0.0	4.146282	No		A
Triticale.650	Triticale.650.1	1337.0											1.0	Triticale.650	1A	333920064.0	333922144.0	5.295489	2.495438	1.3827459999999998	1.691123	0.0	14.284071	20.359529	Yes		A
Triticale.652	Triticale.652.1	1020.0											1.0	Triticale.652	1A	334200701.0	334205333.0	13.329432999999998	1.046652	1.320804	2.128095	14.690331	0.0	12.513228	Yes	TraesCS1A02G184300.2	A
Triticale.651	Triticale.651.1	1638.0											1.0	Triticale.651	1A	334448918.0	334452721.0	7.174942999999999	4.057818	2.640309	0.0	0.0	0.0	2.712265	Yes	TraesCS1A02G184500.1	A
Triticale.657	Triticale.657.1	2332.0											1.0	Triticale.657	1A	335012317.0	335034601.0	1.76053	2.995356	2.348877	18.658679	2.460693	0.0	5.464146	Yes	TraesCS1A02G184600.1	A
Triticale.654	Triticale.654.1	948.0											1.0	Triticale.654	1A	335555755.0	335557336.0	0.0	1.453144	0.0	6.602963000000001	0.0	0.0	0.0	No		A
Triticale.655	Triticale.655.1	1341.0											1.0	Triticale.655	1A	335557631.0	335559236.0	0.0	0.768985	2.406439	7.7183199999999985	18.490162	0.0	0.0	No		A
Triticale.656	Triticale.656.1	1186.0											1.0	Triticale.656	1A	335831555.0	335833575.0	4.80552	4.387427	0.708282	1.677834	0.0	0.0	8.519569	Yes		A
Triticale.658	Triticale.658.1	644.0									Triticale.658.1	Triticale.658.1	1.0	Triticale.658	1A	335999132.0	336001274.0	5.437919	2.576252	7.324200999999999	7.159516	0.0	0.0	0.0	No		A
Triticale.659	Triticale.659.1	1498.0											1.0	Triticale.659	1A	337007598.0	337009432.0	2.692445	7.503660000000001	0.4347430000000001	5.069922	3.4832970000000003	0.0	15.142206	Yes		A
Triticale.660	Triticale.660.1	2489.0											1.0	Triticale.660	1A	338214773.0	338217261.0	21.170599	0.358387	0.0	0.0	0.0	0.0	0.0	Yes	TraesCS1A02G187300.1	A
Triticale.661	Triticale.661.1	2833.0											1.0	Triticale.661	1A	338583264.0	338588594.0	3.886044	0.8298840000000001	1.296309	7.684314	13.719225	9.544517	4.875922	Yes		A
Triticale.663	Triticale.663.1	1636.0											1.0	Triticale.663	1A	338592856.0	338597395.0	44.639318	41.538463	63.17215899999999	49.510872	19.110432	14.016976	34.870351	Yes		A
Triticale.664	Triticale.664.1	1197.0											1.0	Triticale.664	1A	340010733.0	340014644.0	3.158556	14.55092	3.582336	16.114176	8.539427	0.0	11.368175	Yes	TraesCS1A02G188200.2	A
Triticale.662	Triticale.662.1	557.0											1.0	Triticale.662	1A	340249595.0	340250151.0	3.69216	1.338829	0.0	7.484908	3.31339	12.16214	4.19645	Yes	TraesCS1A02G188400.1	A
Triticale.665	Triticale.665.1	2151.0											1.0	Triticale.665	1A	340409226.0	340411376.0	7.375928999999998	0.0	0.03084	0.353555	0.0	0.7504930000000001	0.0	Yes		A
Triticale.666	Triticale.666.1	1434.0											1.0	Triticale.666	1A	341015026.0	341017660.0	8.491503999999999	3.662293	1.079323	4.649331	2.111937	0.0	4.926802	Yes	TraesCS1A02G188700.1	A
Triticale.667	Triticale.667.1	942.0											1.0	Triticale.667	1A	341868537.0	341871854.0	3.634941	1.541312	0.926753	0.0	0.0	0.0	14.299916	Yes		A
Triticale.668	Triticale.668.1	1444.0											1.0	Triticale.668	1A	341872094.0	341873949.0	5.956126	0.0	0.21605	0.0	0.0	0.0	0.0	Yes	TraesCS1A02G188900.1	A
Triticale.669	Triticale.669.1	312.0									Triticale.669.1	Triticale.669.1	1.0	Triticale.669	1A	342589913.0	342590224.0	9.223822	2.065722	2.491909	0.0	1.344638	14.228637	0.0	No		A
Triticale.671	Triticale.671.1	1294.0											1.0	Triticale.671	1A	343389700.0	343394376.0	2.128959	0.0	1.500467	0.0	0.0	0.0	9.088861	Yes		A
Triticale.670	Triticale.670.1	230.0											1.0	Triticale.670	1A	343666521.0	343666750.0	8.276247	0.790804	1.135566	0.0	0.0	0.0	0.0	No		A
Triticale.672	Triticale.672.1	794.0											1.0	Triticale.672	1A	344189064.0	344189857.0	46.1819	0.0	0.0	0.0	0.0	0.0	4.100135	Yes		A
Triticale.673	Triticale.673.1	668.0											1.0	Triticale.673	1A	344293922.0	344294673.0	3.162951	1.37562	2.665984	0.0	0.0	0.0	8.143587	Yes		A
Triticale.674	Triticale.674.1	3610.0											1.0	Triticale.674	1A	344480247.0	344484337.0	3.4963230000000003	1.0122719999999998	3.933207	6.724246000000001	3.708325	0.0	1.435283	Yes		A
Triticale.675	Triticale.675.1	1602.0											1.0	Triticale.675	1A	345108253.0	345116586.0	4.515022	28.386992	27.76000100000001	43.807052	77.781979	12.622995	1.775249	Yes	TraesCS1A02G190800.2	A
Triticale.676	Triticale.676.1	2135.0											1.0	Triticale.676	1A	345167803.0	345171879.0	11.493902	0.0	0.395406	0.661295	0.409867	0.0	6.26242	Yes		A
Triticale.677	Triticale.677.1	3446.0	Triticale.677.1	LTR	Gypsy	reina	no	-	AP|reina RNaseH|reina INT|reina	Triticale.677	Triticale.677.1	Triticale.677.1	1.0	Triticale.677	1A	345309675.0	345327626.0	1.433273	2.338218	1.059772	1.17421	6.072007	0.0	0.926348	No		A
Triticale.678	Triticale.678.1	927.0											1.0	Triticale.678	1A	345786035.0	345786961.0	3.597567	0.0	1.696621	0.0	2.8999080000000004	0.0	14.383319	Yes		A
Triticale.679	Triticale.679.1	1086.0											1.0	Triticale.679	1A	345787885.0	345790279.0	15.675774	1.518255	0.8911319999999999	2.182467	2.140427	0.0	1.651898	Yes	TraesCS1A02G191400.1	A
Triticale.680	Triticale.680.1	1451.0											1.0	Triticale.680	1A	346681505.0	346682955.0	20.37359	0.0	0.0	0.0	0.0	0.0	1.327271	Yes	TraesCS1A02G191700.1	A
Triticale.681	Triticale.681.1	312.0											1.0	Triticale.681	1A	346785341.0	346785745.0	10.616722	0.504391	5.345879	0.0	0.0	0.0	13.816597	No		A
Triticale.682	Triticale.682.1	1308.0											1.0	Triticale.682	1A	347322210.0	347325380.0	7.036836999999999	0.0	3.819985	0.0	0.0	0.0	0.0	Yes	TraesCS1A02G191900.1	A
Triticale.683	Triticale.683.1	562.0											1.0	Triticale.683	1A	347619020.0	347621797.0	16.724943	2.812841	0.607054	0.7585189999999999	0.0	0.0	0.0	Yes	TraesCS1A02G192200.2	A
Triticale.684	Triticale.684.1	2002.0											1.0	Triticale.684	1A	347633894.0	347635895.0	9.008856	1.458365	4.598655	2.793655	0.228441	10.367308	7.347882000000001	Yes	TraesCS1A02G192300.1	A
Triticale.685	Triticale.685.1	1797.0											1.0	Triticale.685	1A	347640314.0	347646237.0	2.282584	0.0	3.444972	3.379938	0.0	14.244996	6.715089	Yes		A
Triticale.686	Triticale.686.1	1862.0											1.0	Triticale.686	1A	348717273.0	348721726.0	8.149728	140.627999	125.884696	114.380645	87.47149	53.086629	65.965711	Yes	TraesCS1A02G193000.1	A
Triticale.687	Triticale.687.1	486.0											1.0	Triticale.687	1A	348981675.0	348991072.0	4.865026	4.578851	4.581617	6.473258	13.941257	0.0	0.0	No		A
Triticale.688	Triticale.688.1	2449.0											1.0	Triticale.688	1A	349358923.0	349361371.0	7.866994999999998	1.5073379999999998	0.1811	0.0	0.0	0.0	0.0	Yes		A
Triticale.689	Triticale.689.1	692.0											1.0	Triticale.689	1A	349997664.0	349998952.0	0.0	6.808683	2.478207	1.069416	4.686101	0.0	8.311016	Yes		A
Triticale.690	Triticale.690.1	1049.0											1.0	Triticale.690	1A	350395538.0	350396586.0	7.176162	0.0	0.702854	5.030926999999998	0.0	0.0	8.465296	Yes		A
Triticale.691	Triticale.691.1	270.0									Triticale.691.1	Triticale.691.1	1.0	Triticale.691	1A	350416295.0	350416564.0	0.0	0.7615149999999999	9.663513	0.0	0.0	0.0	5.27635	No		A
Triticale.693	Triticale.693.1	1471.0											1.0	Triticale.693	1A	350749390.0	350752293.0	6.615059	0.59942	0.761493	0.0	0.0	0.0	0.0	Yes	TraesCS1A02G193500.1	A
Triticale.694	Triticale.694.1	1220.0									Triticale.694.1	Triticale.694.1	1.0	Triticale.694	1A	350752621.0	350753840.0	0.8247620000000001	0.790155	0.8905069999999999	0.0	9.417442	0.0	0.0	Yes		A
Triticale.696	Triticale.696.1	467.0											1.0	Triticale.696	1A	351344186.0	351344916.0	9.926942	1.452911	0.748402	1.6759400000000002	0.0	0.0	4.361177	Yes		A
Triticale.697	Triticale.697.1	1007.0											1.0	Triticale.697	1A	351344987.0	351347996.0	47.088908	0.540291	0.555244	0.0	0.0	0.0	1.776246	Yes	TraesCS1A02G194000.1	A
Triticale.692	Triticale.692.1	966.0											1.0	Triticale.692	1A	351349163.0	351350128.0	4.992411	0.658184	1.4432969999999998	6.509933999999999	0.0	0.0	0.0	Yes		A
Triticale.698	Triticale.698.1	618.0									Triticale.698.1	Triticale.698.1	1.0	Triticale.698	1A	351474713.0	351475330.0	1.620575	0.0	0.379071	7.471761999999999	0.0	0.0	24.187537	Yes		A
Triticale.695	Triticale.695.1	583.0									Triticale.695.1	Triticale.695.1	1.0	Triticale.695	1A	351598610.0	351599192.0	0.0	0.0	0.0	0.0	0.0	28.752692	0.0	No		A
Triticale.699	Triticale.699.1	985.0											1.0	Triticale.699	1A	351604602.0	351608182.0	5.890961	6.118493	5.588706	1.604747	0.0	0.0	0.0	Yes	TraesCS1A02G194400.1	A
Triticale.700	Triticale.700.1	1438.0											1.0	Triticale.700	1A	351878185.0	351882589.0	4.589354	12.557171	7.609108	4.274735	1.150696	2.265258	0.0	Yes	TraesCS1A02G194800.1	A
Triticale.702	Triticale.702.1	2262.0											2.0	Triticale.702	1A	352012912.0	352016758.0	3.222039	4.103023	2.901835	14.559184	8.686977	0.0	1.758053	Yes		A
Triticale.702	Triticale.702.2	2413.0											2.0	Triticale.702	1A	352012912.0	352016758.0	3.222039	4.103023	2.901835	14.559184	8.686977	0.0	1.758053	Yes		A
Triticale.701	Triticale.701.1	393.0									Triticale.701.1	Triticale.701.1	1.0	Triticale.701	1A	352020709.0	352021101.0	13.00465	0.0	2.000494	6.065652	0.0	7.1517	6.941153999999999	No		A
Triticale.703	Triticale.703.1	1789.0											1.0	Triticale.703	1A	352136993.0	352140900.0	7.082468	27.800574	20.046925	17.109652	66.049513	44.255447	4.474133999999999	Yes		A
Triticale.704	Triticale.704.1	429.0									Triticale.704.1	Triticale.704.1	1.0	Triticale.704	1A	352493009.0	352493437.0	6.876706	0.702322	0.379071	9.976525	0.0	0.0	0.0	No		A
Triticale.705	Triticale.705.1	444.0									Triticale.705.1	Triticale.705.1	1.0	Triticale.705	1A	352505686.0	352506285.0	20.146671	1.248544	0.0	0.0	0.0	0.0	0.0	No		A
Triticale.706	Triticale.706.1	559.0									Triticale.706.1	Triticale.706.1	1.0	Triticale.706	1A	352861184.0	352861915.0	4.375785	2.3073360000000003	3.820552	0.0	0.0	0.0	7.598324000000002	Yes		A
Triticale.708	Triticale.708.1	2561.0											1.0	Triticale.708	1A	353251943.0	353256652.0	12.667991	11.781153	9.089129	18.286595	19.709678	46.026181	8.206054	Yes	TraesCS1A02G195400.4	A
Triticale.709	Triticale.709.1	1356.0											1.0	Triticale.709	1A	353256784.0	353259995.0	6.029091	0.0	0.231189	0.0	0.0	0.0	0.0	Yes	TraesCS1A02G195500.2	A
Triticale.707	Triticale.707.1	1239.0											1.0	Triticale.707	1A	353625828.0	353627454.0	0.593176	0.0	1.083673	0.0	0.0	14.413432	4.471485	Yes		A
Triticale.713	Triticale.713.1	1626.0											1.0	Triticale.713	1A	354303667.0	354308075.0	19.07677	9.762973	7.181841	13.811094	2.5302860000000003	14.697088	12.405585	Yes	TraesCS1A02G196300.1	A
Triticale.710	Triticale.710.1	929.0											1.0	Triticale.710	1A	354416937.0	354419789.0	0.0	17.852245	0.0	0.0	0.0	12.194787	0.0	No		A
Triticale.712	Triticale.712.1	400.0									Triticale.712.1	Triticale.712.1	1.0	Triticale.712	1A	354536950.0	354537812.0	6.366242	37.053108	29.722044	38.382948	37.419828	26.953117	5.1444410000000005	No		A
Triticale.711	Triticale.711.1	1137.0											1.0	Triticale.711	1A	354823588.0	354824724.0	12.115479	0.019474	0.0	0.0	0.0	0.0	0.0	Yes	TraesCS1A02G196400.1	A
Triticale.714	Triticale.714.1	1065.0											1.0	Triticale.714	1A	354943521.0	354947442.0	0.0	0.530173	0.0	0.0	0.0	0.0	8.566017	Yes	TraesCS1A02G196700.1	A
Triticale.715	Triticale.715.1	2826.0											1.0	Triticale.715	1A	354950050.0	354955890.0	14.304274	9.404855	3.870928	0.651047	15.595805	0.0	2.447736	Yes	TraesCS1A02G196800.1	A
Triticale.717	Triticale.717.1	1871.0											2.0	Triticale.717	1A	355329994.0	355334226.0	6.080762	13.115254	7.80875	28.895867	45.335357	0.0	8.361505000000001	Yes		A
Triticale.717	Triticale.717.2	1734.0											2.0	Triticale.717	1A	355329994.0	355334226.0	6.080762	13.115254	7.80875	28.895867	45.335357	0.0	8.361505000000001	Yes		A
Triticale.716	Triticale.716.1	895.0											1.0	Triticale.716	1A	355335880.0	355338713.0	36.610676	22.439388	37.070645	8.352382	17.874685	0.0	36.39797	Yes	TraesCS1A02G197300.1	A
Triticale.718	Triticale.718.1	1008.0											1.0	Triticale.718	1A	355345020.0	355348510.0	13.439696	1.6875189999999998	0.988669	0.0	0.0	0.0	0.0	Yes	TraesCS1A02G197500.1	A
Triticale.721	Triticale.721.1	2185.0											1.0	Triticale.721	1A	355624056.0	355628073.0	56.669914	0.2747	3.261402	0.235677	1.803017	0.0	0.0	Yes	TraesCS1A02G197600.1	A
Triticale.719	Triticale.719.1	2083.0											2.0	Triticale.719	1A	355628921.0	355631608.0	51.956074	0.0	0.0	0.0	0.0	0.0	0.0	Yes		A
Triticale.719	Triticale.719.2	2165.0											2.0	Triticale.719	1A	355628921.0	355631608.0	51.956074	0.0	0.0	0.0	0.0	0.0	0.0	Yes	TraesCS1A02G197700.1	A
Triticale.722	Triticale.722.1	1146.0											1.0	Triticale.722	1A	355714313.0	355716842.0	10.897418	19.997121	18.994918	20.192498	10.011407	0.0	7.8776899999999985	Yes	TraesCS1A02G197800.1	A
Triticale.720	Triticale.720.1	891.0											1.0	Triticale.720	1A	355718262.0	355719152.0	17.743329	0.616844	0.156564	0.0	0.0	0.0	0.0	Yes	TraesCS1A02G197900.1	A
Triticale.723	Triticale.723.1	1223.0											1.0	Triticale.723	1A	356389927.0	356392775.0	6.467551	15.157179	16.272176	16.014198	3.256587	72.43251	14.176685999999998	Yes	TraesCS1A02G198200.3	A
Triticale.724	Triticale.724.1	1076.0											1.0	Triticale.724	1A	356467682.0	356471189.0	6.805923	0.622501	0.0	1.166349	0.0	0.0	0.0	No		A
Triticale.725	Triticale.725.1	1300.0											1.0	Triticale.725	1A	356471270.0	356474267.0	17.555948	4.203425	3.162331	9.497691	0.0	0.0	9.002265	Yes	TraesCS1A02G198400.1	A
Triticale.726	Triticale.726.1	1435.0											1.0	Triticale.726	1A	356474337.0	356476835.0	1.850438	7.284762	6.218621	0.308948	1.644958	0.0	8.011963	Yes	TraesCS1A02G198500.1	A
Triticale.727	Triticale.727.1	2289.0											2.0	Triticale.727	1A	357062296.0	357064921.0	35.825615	0.967237	1.436156	0.489632	0.0	4.935201999999999	0.0	Yes		A
Triticale.727	Triticale.727.2	2389.0											2.0	Triticale.727	1A	357062296.0	357064921.0	35.825615	0.967237	1.436156	0.489632	0.0	4.935201999999999	0.0	Yes	TraesCS1A02G198600.1	A
Triticale.728	Triticale.728.1	960.0											1.0	Triticale.728	1A	357121054.0	357123995.0	7.4738229999999986	0.0	0.127147	0.0	1.868066	0.0	0.0	Yes	TraesCS1A02G198800.1	A
Triticale.729	Triticale.729.1	912.0											1.0	Triticale.729	1A	358176329.0	358179493.0	10.183905	1.318006	0.305086	0.0	0.0	0.0	1.446369	Yes	TraesCS1A02G199500.1	A
Triticale.733	Triticale.733.1	1287.0											2.0	Triticale.733	1A	358761380.0	358772026.0	5.090614	15.924814	6.533754	2.796872	0.0	14.413432	0.0	Yes	TraesCS1A02G199600.2	A
Triticale.733	Triticale.733.2	1044.0											2.0	Triticale.733	1A	358761380.0	358772026.0	5.090614	15.924814	6.533754	2.796872	0.0	14.413432	0.0	Yes		A
Triticale.731	Triticale.731.1	228.0											1.0	Triticale.731	1A	358922915.0	358923231.0	0.0	0.0	1.137214	0.0	0.0	0.0	14.347967	Yes		A
Triticale.732	Triticale.732.1	730.0									Triticale.732.1	Triticale.732.1	1.0	Triticale.732	1A	358923274.0	358924003.0	0.0	0.0	0.843304	0.0	0.0	0.0	18.040779	Yes		A
Triticale.730	Triticale.730.1	973.0											1.0	Triticale.730	1A	359689254.0	359690781.0	13.253654999999998	0.0	0.204146	0.0	0.0	0.0	0.0	Yes	TraesCS1A02G200000.1	A
Triticale.734	Triticale.734.1	1376.0											1.0	Triticale.734	1A	360009367.0	360011036.0	5.963287	0.0	0.0	0.0	0.0	0.0	0.0	Yes	TraesCS1A02G200200.1	A
Triticale.737	Triticale.737.1	1593.0											1.0	Triticale.737	1A	361352160.0	361359053.0	7.242105	2.417089	0.8649870000000001	0.5619609999999999	0.966394	0.0	12.341292	Yes	TraesCS1A02G200800.1	A
Triticale.736	Triticale.736.1	655.0											1.0	Triticale.736	1A	362209635.0	362210289.0	37.208346	0.0	0.0	0.0	0.0	0.0	1.820541	Yes	TraesCS1A02G201300.1	A
Triticale.739	Triticale.739.1	2827.0											1.0	Triticale.739	1A	362861992.0	362866218.0	27.52035	4.277108999999999	5.262884	2.652726	2.285871	0.0	10.039437	Yes	TraesCS1A02G201600.2	A
Triticale.738	Triticale.738.1	1274.0											1.0	Triticale.738	1A	363452604.0	363455328.0	0.171665	0.0	0.342474	5.6735760000000015	5.808667	0.0	11.306463	Yes		A
Triticale.740	Triticale.740.1	470.0											1.0	Triticale.740	1A	363693432.0	363695873.0	3.626698	1.383065	1.580002	3.294207	0.0	25.116169	0.0	Yes		A
Triticale.741	Triticale.741.1	428.0									Triticale.741.1	Triticale.741.1	1.0	Triticale.741	1A	364046300.0	364046931.0	0.0	0.0	1.712021	13.399596	1.880475	2404-07-01	93.297699	Yes		A
Triticale.742	Triticale.742.1	246.0											1.0	Triticale.742	1A	364046611.0	364046856.0	0.0	0.0	0.0	11.219656	0.0	0.0	0.0	Yes	TraesCS1A02G202900.1	A
Triticale.745	Triticale.745.1	2096.0											2.0	Triticale.745	1A	364226064.0	364230622.0	14.153258	6.22339	5.0708980000000015	6.185133	24.396568	18.207825	17.561613	Yes	TraesCS1A02G203000.1	A
Triticale.745	Triticale.745.2	2048.0											2.0	Triticale.745	1A	364226064.0	364230622.0	14.153258	6.22339	5.0708980000000015	6.185133	24.396568	18.207825	17.561613	Yes		A
Triticale.743	Triticale.743.1	1050.0											1.0	Triticale.743	1A	364655697.0	364656832.0	9.750107	0.0	0.0	0.0	0.0	0.0	0.0	Yes	TraesCS1A02G203200.1	A
Triticale.744	Triticale.744.1	2160.0											1.0	Triticale.744	1A	365064927.0	365071233.0	6.3331290000000005	1.905617	0.61722	2.978488	0.0	0.0	5.298336	Yes	TraesCS1A02G203400.1	A
Triticale.747	Triticale.747.1	919.0											2.0	Triticale.747	1A	366129560.0	366130553.0	8.106403	2.78413	5.961157	7.831208	12.545039	11.041409	49.343753	No		A
Triticale.747	Triticale.747.2	835.0											2.0	Triticale.747	1A	366129560.0	366130553.0	8.106403	2.78413	5.961157	7.831208	12.545039	11.041409	49.343753	No		A
Triticale.748	Triticale.748.1	1727.0											1.0	Triticale.748	1A	366265077.0	366268189.0	6.302447	0.6094729999999999	2.228554	0.423573	2.832704	0.0	13.589582	Yes	TraesCS1A02G204200.2	A
Triticale.746	Triticale.746.1	1610.0											1.0	Triticale.746	1A	366543063.0	366544672.0	8.420832	0.0	0.0	0.0	0.0	0.0	0.0	Yes	TraesCS1A02G204700.1	A
Triticale.749	Triticale.749.1	1172.0											1.0	Triticale.749	1A	367381194.0	367383318.0	6.001771	0.0	0.0	0.0	0.0	0.0	0.0	Yes	TraesCS1A02G205100.1	A
Triticale.750	Triticale.750.1	1963.0											1.0	Triticale.750	1A	367431625.0	367438082.0	12.178731	4.950680999999999	3.700919	6.9335270000000016	6.2876910000000015	0.0	0.0	Yes	TraesCS1A02G205200.1	A
Triticale.752	Triticale.752.1	2138.0											1.0	Triticale.752	1A	367870093.0	367874461.0	7.667508	2.309162	2.390384	0.720182	0.0	0.0	2.667791	Yes	TraesCS1A02G205300.2	A
Triticale.753	Triticale.753.1	1466.0											1.0	Triticale.753	1A	367874528.0	367877031.0	2.982992	1.387413	4.74253	9.505112	6.136101	0.0	9.33619	Yes	TraesCS1A02G205400.1	A
Triticale.751	Triticale.751.1	780.0									Triticale.751.1	Triticale.751.1	1.0	Triticale.751	1A	368087630.0	368088409.0	5.221417	4.220662	1.211085	5.314388	10.34621	26.055045	0.0	No		A
Triticale.754	Triticale.754.1	1204.0											1.0	Triticale.754	1A	368358381.0	368360780.0	7.978335	0.509687	1.5937370000000002	2.122942	1.048324	0.0	17.844931	Yes	TraesCS1A02G205700.1	A
Triticale.755	Triticale.755.1	1496.0											1.0	Triticale.755	1A	368360970.0	368364132.0	13.75441	22.466014	25.458346	26.640704	8.949767999999997	10.627009	4.89191	No		A
Triticale.758	Triticale.758.1	3746.0											1.0	Triticale.758	1A	368819775.0	368830133.0	6.16748	1.635862	1.164132	1.03966	0.0	0.0	0.0	Yes		A
Triticale.756	Triticale.756.1	1964.0											1.0	Triticale.756	1A	369048987.0	369054322.0	9.918198	0.236355	0.0	0.0	0.702249	0.0	4.0405440000000015	Yes	TraesCS1A02G206900.2	A
Triticale.757	Triticale.757.1	2431.0											1.0	Triticale.757	1A	369695981.0	369698411.0	2.782678	1.484668	2.656619	4.533275	11.169898	0.0	3.837347	Yes		A
Triticale.761	Triticale.761.1	1797.0											1.0	Triticale.761	1A	370092549.0	370097701.0	4.315494	2.5713220000000003	6.714648	0.6120329999999999	5.015876	12.929583	3.4617760000000004	Yes	TraesCS1A02G208500.1	A
Triticale.759	Triticale.759.1	3539.0											1.0	Triticale.759	1A	370103188.0	370108149.0	6.491357	3.090369	4.189923	17.138720000000006	8.634376	0.0	4.991585	Yes		A
Triticale.760	Triticale.760.1	1603.0											1.0	Triticale.760	1A	371085322.0	371087865.0	0.0	0.0	0.379071	5.006952	0.0	0.0	7.662721	Yes		A
Triticale.762	Triticale.762.1	1890.0											1.0	Triticale.762	1A	371219250.0	371221669.0	80.04209300000002	0.0	0.0	0.0	0.0	0.0	0.0	Yes	TraesCS1A02G209100.1	A
Triticale.764	Triticale.764.1	367.0									Triticale.764.1	Triticale.764.1	1.0	Triticale.764	1A	372227749.0	372228203.0	0.0	0.0	0.0	3.057192	0.0	39.155831	0.0	Yes		A
Triticale.763	Triticale.763.1	570.0											1.0	Triticale.763	1A	372228422.0	372230918.0	0.0	0.0	0.0	3.410302	0.0	14.413432	0.0	Yes		A
Triticale.766	Triticale.766.1	807.0											1.0	Triticale.766	1A	372236293.0	372240822.0	22.952761	1.230793	0.0	0.0	0.0	0.0	7.826257000000001	Yes	TraesCS1A02G209600.1	A
Triticale.765	Triticale.765.1	419.0									Triticale.765.1	Triticale.765.1	1.0	Triticale.765	1A	372243527.0	372243945.0	0.0	0.0	0.0	0.0	0.0	0.0	8.071933999999999	No		A
Triticale.767	Triticale.767.1	1713.0											2.0	Triticale.767	1A	372549757.0	372554747.0	23.056696	6.650616	3.971385	8.318245	8.327206	32.344663	18.612218	Yes		A
Triticale.767	Triticale.767.2	1085.0											2.0	Triticale.767	1A	372549757.0	372554747.0	23.056696	6.650616	3.971385	8.318245	8.327206	32.344663	18.612218	Yes		A
Triticale.770	Triticale.770.1	1810.0											1.0	Triticale.770	1A	372627800.0	372637165.0	11.069583	1.541849	1.92028	1.14085	0.0	10.025695	3.127915	Yes	TraesCS1A02G210300.2	A
Triticale.768	Triticale.768.1	1514.0											1.0	Triticale.768	1A	374568167.0	374569680.0	1.006204	0.0	4.170286	1.5790110000000002	18.390774	0.0	11.904896	Yes		A
Triticale.769	Triticale.769.1	1267.0											1.0	Triticale.769	1A	374689298.0	374690747.0	15.202509	5.118067	6.4612680000000005	0.0	0.0	3.70859	0.0	Yes	TraesCS1A02G212000.1	A
Triticale.771	Triticale.771.1	1266.0											1.0	Triticale.771	1A	375014696.0	375016345.0	14.645854	1.30239	0.471594	0.0	0.581693	0.0	0.0	Yes	TraesCS1A02G212300.1	A
Triticale.773	Triticale.773.1	1189.0											1.0	Triticale.773	1A	375112041.0	375113726.0	195.101933	10.712097	10.811665	4.166076	2.389622	5.273212	5.866557	Yes	TraesCS1A02G212400.1	A
Triticale.774	Triticale.774.1	1292.0											1.0	Triticale.774	1A	375467542.0	375469699.0	116.256155	4.179875	2.439905	0.0	0.0	5.9237910000000005	4.128786	Yes	TraesCS1A02G212600.1	A
Triticale.772	Triticale.772.1	484.0											1.0	Triticale.772	1A	375862530.0	375863013.0	9.57439	0.0	0.0	0.0	0.0	0.0	0.0	No		A
Triticale.775	Triticale.775.1	2022.0											1.0	Triticale.775	1A	376135494.0	376140783.0	1.869364	8.346851	2.023589	2.176555	11.405233	0.0	3.36361	Yes		A
Triticale.778	Triticale.778.1	2145.0											1.0	Triticale.778	1A	376501862.0	376506945.0	6.413298999999999	1.4861209999999998	1.562057	0.193171	24.31869	0.0	3.406876	Yes	TraesCS1A02G213000.1	A
Triticale.777	Triticale.777.1	931.0											1.0	Triticale.777	1A	376509121.0	376512953.0	10.993336	9.439529	11.567583	19.78781	13.271042	0.0	23.25901	Yes	TraesCS1A02G213100.1	A
Triticale.776	Triticale.776.1	1113.0											1.0	Triticale.776	1A	376755386.0	376757948.0	15.238995	0.607491	0.398485	0.0	0.8347540000000001	0.0	3.3848260000000003	No		A
Triticale.779	Triticale.779.1	456.0									Triticale.779.1	Triticale.779.1	1.0	Triticale.779	1A	376995535.0	376996131.0	7.552248	0.0	0.0	0.0	0.0	0.0	0.0	No		A
Triticale.781	Triticale.781.1	1090.0											1.0	Triticale.781	1A	377026852.0	377028257.0	2.8796060000000003	7.154234	0.0	3.410302	19.822515	29.554151	13.389344	Yes		A
Triticale.780	Triticale.780.1	928.0											1.0	Triticale.780	1A	377444023.0	377445878.0	1.256224	1.575642	2.434145	0.0	0.0	14.413432	3.22949	Yes		A
Triticale.784	Triticale.784.1	855.0											2.0	Triticale.784	1A	377499611.0	377502695.0	28.570185	1.177419	0.017734	2.106407	2.253314	0.0	3.017703	Yes		A
Triticale.784	Triticale.784.2	852.0											2.0	Triticale.784	1A	377499611.0	377502695.0	28.570185	1.177419	0.017734	2.106407	2.253314	0.0	3.017703	Yes		A
Triticale.782	Triticale.782.1	270.0									Triticale.782.1	Triticale.782.1	1.0	Triticale.782	1A	377884586.0	377884855.0	0.0	9.407636	0.0	1.705151	0.0	0.0	0.0	No		A
Triticale.785	Triticale.785.1	400.0									Triticale.785.1	Triticale.785.1	1.0	Triticale.785	1A	379137793.0	379138357.0	41.039149	31.236747	5.952369	0.0	0.0	12.827954	0.0	Yes	TraesCS1A02G214800.1	A
Triticale.786	Triticale.786.1	1861.0											1.0	Triticale.786	1A	379185681.0	379190146.0	4.621518	1.866314	0.175175	10.919013	0.0	0.0	5537-01-01	No		A
Triticale.787	Triticale.787.1	427.0									Triticale.787.1	Triticale.787.1	1.0	Triticale.787	1A	380359150.0	380359576.0	5.433929	18.629261	7.705713999999999	2.000657	0.0	0.0	0.0	No		A
Triticale.790	Triticale.790.1	1551.0											1.0	Triticale.790	1A	380971710.0	380973668.0	1.850627	0.499669	2429-02-01	6.715062	4.053839	3.364066	15.52968	Yes		A
Triticale.788	Triticale.788.1	2070.0											1.0	Triticale.788	1A	381096100.0	381098610.0	5.970941000000002	0.0	0.0	0.0	0.0	0.0	0.0	Yes	TraesCS1A02G215500.1	A
Triticale.791	Triticale.791.1	1321.0											1.0	Triticale.791	1A	381304833.0	381312507.0	16.645898000000006	8.145099	1.514277	0.0	0.83144	9.056132	5.424135	Yes	TraesCS1A02G215700.1	A
Triticale.794	Triticale.794.1	1191.0											2.0	Triticale.794	1A	381314573.0	381318934.0	12.90357	7.393003	0.778195	1.357249	0.0	0.0	0.0	Yes		A
Triticale.794	Triticale.794.2	991.0											2.0	Triticale.794	1A	381314573.0	381318934.0	12.90357	7.393003	0.778195	1.357249	0.0	0.0	0.0	Yes		A
Triticale.792	Triticale.792.1	614.0									Triticale.792.1	Triticale.792.1	1.0	Triticale.792	1A	382249834.0	382251006.0	2.580462	5.593584	4.0673010000000005	1.644054	0.0	14.366487	5.938041	Yes		A
Triticale.793	Triticale.793.1	960.0											1.0	Triticale.793	1A	382252188.0	382253147.0	8.869054	0.0	0.0	0.0	0.0	0.0	0.0	Yes	TraesCS1A02G216300.1	A
Triticale.795	Triticale.795.2	517.0									Triticale.795.2	Triticale.795.2	2.0	Triticale.795	1A	383152607.0	383161379.0	5.789104	6.4928230000000005	13.459669	11.090338	18.833807	16.059157	9.075712	No		A
Triticale.795	Triticale.795.1	543.0									Triticale.795.1	Triticale.795.1	2.0	Triticale.795	1A	383152607.0	383161379.0	5.789104	6.4928230000000005	13.459669	11.090338	18.833807	16.059157	9.075712	No		A
Triticale.796	Triticale.796.1	1126.0											1.0	Triticale.796	1A	384324130.0	384326787.0	4.98573	3.550189	5.342012	10.762441	0.0	0.0	0.0	Yes	TraesCS1A02G216800.1	A
Triticale.797	Triticale.797.1	1003.0											1.0	Triticale.797	1A	384331796.0	384333134.0	4.898083	0.0	1.118318	4.279029	8.984774	0.0	0.0	Yes		A
Triticale.798	Triticale.798.1	826.0											1.0	Triticale.798	1A	385274610.0	385277432.0	252.020385	118.091118	151.59598400000004	246.208515	62.966762	588.385584	866.3689630000001	Yes	TraesCS1A02G217200.1	A
Triticale.799	Triticale.799.1	1156.0											1.0	Triticale.799	1A	385350618.0	385353128.0	9.443114	2.130929	0.690264	6.597872	10.602344	6.72045	5.70996	Yes		A
Triticale.800	Triticale.800.1	1701.0											1.0	Triticale.800	1A	385354287.0	385357722.0	5.909878	1.579747	1.241286	6.235177999999999	0.0	0.0	10.289035	Yes		A
Triticale.801	Triticale.801.1	2679.0											2.0	Triticale.801	1A	385888493.0	385900007.0	3.211445	10.414463	6.812249	19.475891	17.489801999999994	0.0	5.520571	Yes	TraesCS1A02G217900.1	A
Triticale.801	Triticale.801.2	2410.0											2.0	Triticale.801	1A	385888493.0	385900007.0	3.211445	10.414463	6.812249	19.475891	17.489801999999994	0.0	5.520571	Yes		A
Triticale.803	Triticale.803.1	1444.0											2.0	Triticale.803	1A	386425625.0	386435664.0	17.527683	7.831914	2.843823	2.502227	0.5199630000000001	9.013382	0.0	Yes	TraesCS1A02G218000.1	A
Triticale.803	Triticale.803.2	1379.0											2.0	Triticale.803	1A	386425625.0	386435664.0	17.527683	7.831914	2.843823	2.502227	0.5199630000000001	9.013382	0.0	Yes		A
Triticale.802	Triticale.802.1	1898.0											1.0	Triticale.802	1A	387359860.0	387363581.0	13.116060999999998	4.141095	8.533102	3.857703	0.275109	0.0	22.865109	Yes	TraesCS1A02G218700.1	A
Triticale.804	Triticale.804.1	1294.0											1.0	Triticale.804	1A	387515313.0	387517299.0	20.908765	7.1789580000000015	2.719706	0.7392489999999999	4.050532	0.0	4.142789	Yes	TraesCS1A02G218800.1	A
Triticale.805	Triticale.805.1	1603.0											1.0	Triticale.805	1A	387520022.0	387524441.0	9.033193	1.6329129999999998	2.506175	2.289136	6.980903	5.4848300000000005	0.931508	Yes	TraesCS1A02G218900.1	A
Triticale.806	Triticale.806.1	2443.0											1.0	Triticale.806	1A	387562068.0	387565809.0	3.558563	0.284534	0.7530220000000001	6.595856	0.8682120000000001	0.0	0.0	No		A
Triticale.807	Triticale.807.1	1111.0											1.0	Triticale.807	1A	387835275.0	387837032.0	0.0	0.363015	3.355687	5.115453	0.0	0.0	14.561016	No		A
Triticale.808	Triticale.808.1	1421.0											1.0	Triticale.808	1A	388156746.0	388159972.0	7.133174	0.0	1.180697	4.19388	0.0	0.0	3.713126	Yes	TraesCS1A02G219400.1	A
Triticale.809	Triticale.809.1	440.0									Triticale.809.1	Triticale.809.1	1.0	Triticale.809	1A	388832114.0	388832553.0	0.0	0.5266029999999999	0.674575	0.7711939999999999	5.643072	11.69454	18.059505	Yes		A
Triticale.810	Triticale.810.1	1560.0											1.0	Triticale.810	1A	389061317.0	389065039.0	21.179892	12.293956	13.904875	3.800519	1.6666580000000002	14.256369	9382-07-01	Yes	TraesCS1A02G220200.2	A
Triticale.811	Triticale.811.1	1092.0											1.0	Triticale.811	1A	389767598.0	389771120.0	49.085414	6.496611	1.912714	0.0	0.951386	0.0	1.396397	Yes	TraesCS1A02G220400.1	A
Triticale.812	Triticale.812.1	1210.0											1.0	Triticale.812	1A	389798147.0	389802833.0	18.14732	0.953539	1.328003	1.633281	0.0	0.0	4.330094	Yes	TraesCS1A02G220500.1	A
Triticale.813	Triticale.813.1	1105.0											1.0	Triticale.813	1A	389823428.0	389828026.0	9.304731	0.0	0.0	0.0	0.0	0.0	0.0	Yes	TraesCS1A02G220800.1	A
Triticale.818	Triticale.818.1	1889.0											1.0	Triticale.818	1A	390088607.0	390091497.0	1.480239	0.294302	0.36984	1.001969	0.0	16.351505	0.0	Yes		A
Triticale.819	Triticale.819.1	1926.0											1.0	Triticale.819	1A	390093595.0	390097100.0	6.637647	2322-07-01	5.3363260000000015	1.142964	18.552347	7.730572	17.905620000000006	Yes		A
Triticale.814	Triticale.814.1	1496.0											2.0	Triticale.814	1A	391256742.0	391260253.0	3.343548	4.359464	5.125573	16.044604	8.126525	0.0	0.0	Yes	TraesCS1A02G221900.4	A
Triticale.814	Triticale.814.2	1370.0											2.0	Triticale.814	1A	391256742.0	391260253.0	3.343548	4.359464	5.125573	16.044604	8.126525	0.0	0.0	Yes		A
Triticale.815	Triticale.815.1	1102.0											1.0	Triticale.815	1A	391669902.0	391674913.0	31.522389	0.734831	0.284819	1.852147	1.08817	3577-08-01	9.125885	Yes	TraesCS1A02G222000.1	A
Triticale.816	Triticale.816.1	3157.0											1.0	Triticale.816	1A	392526744.0	392531141.0	14.654425	3.398928	7.394595	14.432479999999998	8.717559	13.733161	6.992794	Yes		A
Triticale.817	Triticale.817.1	603.0									Triticale.817.1	Triticale.817.1	1.0	Triticale.817	1A	392744243.0	392744845.0	2.569941	0.0	1.93559	0.964273	0.0	0.0	9.625181	Yes		A
Triticale.821	Triticale.821.1	663.0											1.0	Triticale.821	1A	392777543.0	392781440.0	2.678557	3.710694	5271-09-01	3.150543	0.0	0.0	8.91329	Yes	TraesCS1A02G223000.1	A
Triticale.820	Triticale.820.1	614.0									Triticale.820.1	Triticale.820.1	1.0	Triticale.820	1A	393303337.0	393303950.0	0.0	0.0	0.0	1.616284	0.0	0.0	5.27635	No		A
Triticale.822	Triticale.822.1	799.0											1.0	Triticale.822	1A	393456324.0	393459251.0	6.791247	0.0	0.213495	0.0	0.0	0.0	0.0	Yes	TraesCS1A02G223200.1	A
Triticale.823	Triticale.823.1	1544.0											1.0	Triticale.823	1A	393460988.0	393467437.0	1.2444110000000002	4.988619	1.666049	2.479315	3.848316000000001	0.0	7.801753	Yes		A
Triticale.824	Triticale.824.1	3485.0											1.0	Triticale.824	1A	394252788.0	394259002.0	1.738279	2.242615	0.709413	1.427239	18.194547	2.092744	4.439099	Yes		A
Triticale.826	Triticale.826.1	1240.0											1.0	Triticale.826	1A	394299047.0	394302178.0	65.684258	2.531209	4.807482	2.015928	5.972293	0.0	35.632382	Yes	TraesCS1A02G223800.1	A
Triticale.825	Triticale.825.1	846.0											1.0	Triticale.825	1A	394320354.0	394322321.0	5.581839	0.0	0.0	0.0	1.221646	14.413432	0.0	Yes		A
Triticale.828	Triticale.828.1	1562.0											1.0	Triticale.828	1A	394325250.0	394328956.0	25.837499	6.324404	10.197798	11.751568	1.549252	19.9961	18.122673	Yes		A
Triticale.827	Triticale.827.1	764.0											1.0	Triticale.827	1A	394587827.0	394588663.0	0.0	0.0	0.0	17.274697	0.0	0.0	25.953562	Yes	TraesCS1A02G224600.1	A
Triticale.830	Triticale.830.1	1639.0											1.0	Triticale.830	1A	394588931.0	394607136.0	12.99418	5.954429	2.468474	2.1462630000000003	0.0	7.659615	1.493729	Yes	TraesCS1A02G224700.1	A
Triticale.829	Triticale.829.1	1996.0											1.0	Triticale.829	1A	394849309.0	394853352.0	7.371707000000002	24.415867	13.919291	16.875526	3.252888	23.447108	14.734654999999998	Yes		A
Triticale.831	Triticale.831.1	659.0											1.0	Triticale.831	1A	395168458.0	395169116.0	0.0	0.790804	4.623636	0.0	3.387976	12.313755	11.953855	No		A
Triticale.833	Triticale.833.1	2593.0											1.0	Triticale.833	1A	395172461.0	395180575.0	2.150192	7.434713	2.190077	12.074152	13.288482	7.053861	2.057228	Yes	TraesCS1A02G225000.2	A
Triticale.832	Triticale.832.1	660.0											1.0	Triticale.832	1A	396288416.0	396289901.0	126.977838	7.89965	23.126803	15.930243	0.0	20.331673	27.700836	No		A
Triticale.834	Triticale.834.1	2342.0											1.0	Triticale.834	1A	396462673.0	396469872.0	0.959468	6.059002	3.28507	9.346296	19.273982	0.0	2.640428	Yes	TraesCS1A02G226500.1	A
Triticale.837	Triticale.837.1	1256.0											1.0	Triticale.837	1A	397771970.0	397776201.0	15.370774	5.431738	8.256272000000001	7.124707000000001	1.194152	9.134628	2.440734	Yes	TraesCS1A02G227200.1	A
Triticale.835	Triticale.835.1	3440.0											1.0	Triticale.835	1A	398050209.0	398053648.0	8.301125	3.846203	3.5750620000000004	4.157298	0.0	6.56565	2.768548	Yes	TraesCS1A02G227300.1	A
Triticale.836	Triticale.836.1	948.0											1.0	Triticale.836	1A	398119362.0	398120309.0	18.848793	0.0	0.0	0.0	0.0	0.0	0.0	No		A
Triticale.839	Triticale.839.1	3167.0											1.0	Triticale.839	1A	398465945.0	398478395.0	0.878167	2.317726	2.024148	11.326036	2.474257	0.0	0.0	Yes		A
Triticale.838	Triticale.838.1	1942.0											1.0	Triticale.838	1A	398665942.0	398670981.0	2.907232	10.317097	19.366217	6.204221	1.4324629999999998	41.214098	14.375473	Yes	TraesCS1A02G227700.1	A
Triticale.843	Triticale.843.1	1235.0											1.0	Triticale.843	1A	399224620.0	399229684.0	8.292605	0.0	2.248339	0.0	0.0	4.960094000000002	0.0	Yes		A
Triticale.840	Triticale.840.1	977.0											1.0	Triticale.840	1A	400582476.0	400585933.0	0.0	2.245332	3.63474	3.265443	9.634852	0.0	0.0	No		A
Triticale.841	Triticale.841.1	651.0											1.0	Triticale.841	1A	400955575.0	400956225.0	50.01112	0.0	0.3272469999999999	0.0	0.0	0.0	0.0	Yes	TraesCS1A02G228700.1	A
Triticale.842	Triticale.842.1	1376.0											1.0	Triticale.842	1A	400960773.0	400962148.0	6.5130930000000005	0.0	0.0	0.0	0.0	0.0	0.0	Yes		A
Triticale.845	Triticale.845.1	808.0											1.0	Triticale.845	1A	400965658.0	400969054.0	8.576594	0.0	0.0	0.0	0.0	0.0	0.0	Yes	TraesCS1A02G228900.1	A
Triticale.844	Triticale.844.1	722.0											1.0	Triticale.844	1A	400974682.0	400975403.0	87.86309	0.0	0.957129	0.0	0.0	7.705794999999998	0.0	Yes	TraesCS1A02G229000.1	A
Triticale.846	Triticale.846.1	737.0											1.0	Triticale.846	1A	401226660.0	401227396.0	60.072171	0.0	0.0	0.0	0.0	0.0	0.0	Yes	TraesCS1A02G229100.1	A
Triticale.850	Triticale.850.1	1179.0											2.0	Triticale.850	1A	402800625.0	402805248.0	8.276767	12.972132	43.95072800000001	82.476375	4.787709	8.374377	38.097166	Yes		A
Triticale.850	Triticale.850.2	1353.0											2.0	Triticale.850	1A	402800625.0	402805248.0	8.276767	12.972132	43.95072800000001	82.476375	4.787709	8.374377	38.097166	Yes		A
Triticale.851	Triticale.851.1	1944.0											1.0	Triticale.851	1A	402805384.0	402809289.0	3.039435	24.154498	13.901431	7.916146	26.746061	13.442154	3.550139	Yes		A
Triticale.847	Triticale.847.1	705.0											1.0	Triticale.847	1A	402920832.0	402930301.0	33.42846	0.0	0.445207	0.0	2.04828	8.954734	0.0	Yes	TraesCS1A02G230100.1	A
Triticale.848	Triticale.848.1	1855.0											1.0	Triticale.848	1A	403023006.0	403026917.0	36.244185	6.185748	3.570015	12.924217	6.590674000000001	22.571982	8.584378	Yes	TraesCS1A02G230400.1	A
Triticale.849	Triticale.849.1	654.0									Triticale.849.1	Triticale.849.1	1.0	Triticale.849	1A	403305265.0	403305918.0	0.0	7.1087690000000014	0.0	0.0	0.0	0.0	0.0	No		A
Triticale.853	Triticale.853.1	2257.0											1.0	Triticale.853	1A	403361944.0	403386308.0	6.91349	15.321691	11.094851	25.383858	8.079716000000001	19.011432	15.235254	Yes		A
Triticale.852	Triticale.852.1	495.0											1.0	Triticale.852	1A	403634444.0	403634938.0	24.842348	2.372411	1.837922	0.0	1.800545	0.0	1.001974	Yes	TraesCS1A02G231000.1	A
Triticale.858	Triticale.858.1	2570.0											1.0	Triticale.858	1A	403655224.0	403662368.0	6.472514	4.927292	3.942785	7.35338	0.945812	0.0	7.03787	Yes		A
Triticale.854	Triticale.854.1	920.0											1.0	Triticale.854	1A	403830277.0	403831326.0	13.36116	0.0	0.0	0.0	0.518634	0.0	1.927013	Yes	TraesCS1A02G231200.1	A
Triticale.856	Triticale.856.1	2077.0											1.0	Triticale.856	1A	404473029.0	404475422.0	4.160783	9.880667	4.762575	9.935357000000002	14.96351	0.0	1.712207	No		A
Triticale.855	Triticale.855.1	918.0											1.0	Triticale.855	1A	404928561.0	404929478.0	1.896682	0.0	1.748766	10.425939	0.0	10.409697	26.795583	No		A
Triticale.857	Triticale.857.1	790.0											1.0	Triticale.857	1A	405395739.0	405396528.0	6.569205	0.0	0.279265	0.0	0.0	0.0	0.0	No		A
Triticale.859	Triticale.859.1	669.0											1.0	Triticale.859	1A	405517322.0	405518065.0	0.938628	0.0	0.0	0.0	0.0	14.413432	0.0	Yes		A
Triticale.860	Triticale.860.1	917.0											1.0	Triticale.860	1A	407114550.0	407117132.0	33.401635	19.464809	33.929993	17.397374	15.607997	40.583943	56.51505600000001	Yes	TraesCS1A02G233200.1	A
Triticale.861	Triticale.861.1	2122.0											1.0	Triticale.861	1A	407330864.0	407335199.0	3.767338	8.831138000000003	2.530061	2.53603	10.474896	0.0	5.793543	Yes	TraesCS1A02G233600.1	A
Triticale.862	Triticale.862.1	736.0											1.0	Triticale.862	1A	408485600.0	408488681.0	44.406273	0.703773	1.074894	2.441887	0.0	0.0	6.086444	Yes	TraesCS1A02G233700.1	A
Triticale.864	Triticale.864.1	1660.0											1.0	Triticale.864	1A	409827047.0	409834035.0	2.975902	23.504973	24.761814	22.917844	51.659376	55.283323	29.102567	Yes	TraesCS1A02G234200.3	A
Triticale.863	Triticale.863.1	598.0											1.0	Triticale.863	1A	410156456.0	410157053.0	0.0	2.517876	2.97045	10.553116	9.36705	0.0	0.0	Yes		A
Triticale.866	Triticale.866.1	2215.0											1.0	Triticale.866	1A	413785351.0	413798545.0	3.148535	2.693731	0.535321	1.661271	8.392247	0.0	16.291178	Yes		A
Triticale.865	Triticale.865.1	886.0									Triticale.865.1	Triticale.865.1	1.0	Triticale.865	1A	414218132.0	414219017.0	0.572076	10.529472	18.666059	27.226606	7.669589999999999	9.419163	2.906161	No		A
Triticale.867	Triticale.867.1	808.0									Triticale.867.1	Triticale.867.1	1.0	Triticale.867	1A	414798931.0	414801357.0	0.0	0.424764	0.0	0.0	7.810533	0.0	0.0	No		A
Triticale.869	Triticale.869.1	2708.0											1.0	Triticale.869	1A	415580733.0	415585379.0	0.0	1.221833	1.029428	15.811057	20.708264	0.0	5.899845	Yes	TraesCS1A02G235100.3	A
Triticale.871	Triticale.871.1	712.0											1.0	Triticale.871	1A	415790755.0	415793966.0	0.729018	0.811906	0.907216	7.586963000000001	0.0	0.0	0.0	No		A
Triticale.870	Triticale.870.1	403.0									Triticale.870.1	Triticale.870.1	1.0	Triticale.870	1A	416527880.0	416528282.0	0.0	0.0	0.0	0.0	0.0	0.0	8.837558999999997	No		A
Triticale.873	Triticale.873.1	1710.0											2.0	Triticale.873	1A	416536877.0	416540168.0	2.686341	32.301745000000004	21.434307	62.09843299999999	37.731101	38.752255	9.436883	Yes	TraesCS1A02G235500.1	A
Triticale.873	Triticale.873.2	1220.0											2.0	Triticale.873	1A	416536877.0	416540168.0	2.686341	32.301745000000004	21.434307	62.09843299999999	37.731101	38.752255	9.436883	Yes		A
Triticale.872	Triticale.872.1	536.0									Triticale.872.1	Triticale.872.1	1.0	Triticale.872	1A	416542613.0	416546310.0	22.492041	28.715321000000007	28.568972	33.450862	21.791299	25.035266	88.36901800000003	Yes	TraesCS1A02G235600.1	A
Triticale.874	Triticale.874.1	957.0											2.0	Triticale.874	1A	416549749.0	416552551.0	64.420872	20.091382	25.346382	9.441046	9.159213	51.674488	53.409919	No		A
Triticale.874	Triticale.874.2	955.0											2.0	Triticale.874	1A	416549749.0	416552551.0	64.420872	20.091382	25.346382	9.441046	9.159213	51.674488	53.409919	No		A
Triticale.875	Triticale.875.1	447.0									Triticale.875.1	Triticale.875.1	1.0	Triticale.875	1A	417382315.0	417383358.0	0.894531	10.85011	6.835159	20.545734	10.247398	7.351816	7.967642	No		A
Triticale.876	Triticale.876.1	602.0									Triticale.876.1	Triticale.876.1	1.0	Triticale.876	1A	417915874.0	417916756.0	1.493696	2.7770080000000004	8.224338000000001	3.642566	0.0	6.8954580000000005	0.0	No		A
Triticale.879	Triticale.879.1	1709.0											1.0	Triticale.879	1A	418034472.0	418040048.0	4.218058	13.062838	12.290876	6.549215	2.079739	5.203681	18.79911700000001	Yes	TraesCS1A02G235900.3	A
Triticale.878	Triticale.878.1	1125.0											1.0	Triticale.878	1A	418041607.0	418046718.0	0.0	0.0	0.218008	2.41601	1.469245	14.413432	0.0	Yes		A
Triticale.877	Triticale.877.1	403.0									Triticale.877.1	Triticale.877.1	1.0	Triticale.877	1A	418917935.0	418918337.0	79.864868	17.923576	19.979792	7.349497	19.292195	40.59365800000001	19.24624	Yes		A
Triticale.880	Triticale.880.1	1467.0											1.0	Triticale.880	1A	418936644.0	418939889.0	4.627236	1.122866	3.243684	3.271983	8.014696	0.0	4.524639	Yes	TraesCS1A02G236500.1	A
Triticale.881	Triticale.881.1	823.0									Triticale.881.1	Triticale.881.1	1.0	Triticale.881	1A	419028842.0	419029664.0	3.902775	0.569802	1.985174	1.466885	6.213303	5.306521	10.251378	Yes		A
Triticale.882	Triticale.882.1	1195.0											1.0	Triticale.882	1A	419479085.0	419481573.0	9.44283	0.31963	0.142112	1.034507	0.0	0.0	0.0	Yes	TraesCS1A02G236700.1	A
Triticale.883	Triticale.883.1	1066.0											1.0	Triticale.883	1A	420381036.0	420397136.0	0.565289	4.447343	0.746764	6.627056	3.36631	0.0	6.637511	Yes		A
Triticale.884	Triticale.884.1	1474.0											1.0	Triticale.884	1A	424316131.0	424319254.0	0.0	1.964133	2.112924	16.96012	44.281927	0.0	0.0	No		A
Triticale.886	Triticale.886.1	1115.0											1.0	Triticale.886	1A	425731977.0	425734036.0	4.693137999999999	3.5029410000000003	6.63902	6.793075999999999	0.0	0.0	8.461086	Yes		A
Triticale.885	Triticale.885.1	833.0											1.0	Triticale.885	1A	426071442.0	426072274.0	8.220035000000001	0.348409	0.217977	0.0	0.0	0.0	0.0	No		A
Triticale.887	Triticale.887.1	2904.0											1.0	Triticale.887	1A	426520222.0	426523256.0	0.359742	9.532671	5.369265	9.942604	4.660088	9.147369	0.0	Yes	TraesCS1A02G239100.1	A
Triticale.888	Triticale.888.1	735.0											2.0	Triticale.888	1A	426888740.0	426892014.0	7.825941999999999	3.725489	6.62107	9.646278	4.051839	12.514246	30.729535	Yes		A
Triticale.888	Triticale.888.2	850.0											2.0	Triticale.888	1A	426888740.0	426892014.0	7.825941999999999	3.725489	6.62107	9.646278	4.051839	12.514246	30.729535	Yes	TraesCS1A02G239800.1	A
Triticale.891	Triticale.891.1	1805.0											1.0	Triticale.891	1A	426929581.0	426933776.0	0.553817	13.53742	10.531255	10.513366	0.0	0.0	0.844802	Yes	TraesCS1A02G240000.1	A
Triticale.889	Triticale.889.1	697.0											1.0	Triticale.889	1A	427038436.0	427039251.0	0.0	0.0	0.0	0.0	0.0	14.413432	0.0	Yes	TraesCS1A02G240100.1	A
Triticale.890	Triticale.890.1	911.0											1.0	Triticale.890	1A	427484457.0	427485367.0	4.359312999999998	0.688372	1.086034	0.0	0.0	0.0	9.724471	Yes		A
Triticale.892	Triticale.892.1	993.0											1.0	Triticale.892	1A	427520626.0	427522787.0	0.0	0.0	0.0	0.0	0.0	14.413432	0.0	Yes		A
Triticale.893	Triticale.893.1	1658.0											1.0	Triticale.893	1A	428547330.0	428550195.0	1.502484	0.0	0.151583	0.0	11.714404	0.0	0.0	Yes		A
Triticale.894	Triticale.894.1	1942.0											1.0	Triticale.894	1A	428972963.0	428979527.0	6.591660000000001	17.192041	6.18187	1.591885	3.162544	0.0	0.0	Yes	TraesCS1A02G241300.1	A
Triticale.895	Triticale.895.1	604.0									Triticale.895.1	Triticale.895.1	1.0	Triticale.895	1A	430233541.0	430234144.0	1.877255	0.0	0.0	3.370778	0.0	24.961008	0.0	Yes		A
Triticale.896	Triticale.896.1	2057.0											1.0	Triticale.896	1A	430584230.0	430591637.0	6.2610160000000015	2.212867	0.953852	0.718701	0.0	0.0	0.0	Yes	TraesCS1A02G242500.1	A
Triticale.897	Triticale.897.1	1320.0											1.0	Triticale.897	1A	430592953.0	430600790.0	10.654136	0.0	0.0	0.0	0.0	0.0	0.0	No		A
Triticale.898	Triticale.898.1	1873.0											1.0	Triticale.898	1A	430605350.0	430611761.0	6.6595960000000005	1.664783	0.126897	0.0	0.750788	0.0	3.898811	Yes	TraesCS1A02G242600.1	A
Triticale.900	Triticale.900.1	739.0											1.0	Triticale.900	1A	430624117.0	430626257.0	13.891435	9.168615	11.338288	9.977094	6.4176400000000005	24.145914	2.7631240000000004	Yes	TraesCS1A02G242900.1	A
Triticale.899	Triticale.899.1	1383.0											1.0	Triticale.899	1A	431013740.0	431016744.0	0.373958	0.0	2548-01-01	6.816905	0.0	5.784139	1.884686	Yes		A
Triticale.902	Triticale.902.1	1221.0											1.0	Triticale.902	1A	431017433.0	431026493.0	0.6734140000000001	0.0	0.529334	0.0	0.435021	0.0	14.562899	Yes		A
Triticale.901	Triticale.901.1	865.0											1.0	Triticale.901	1A	431432448.0	431433474.0	5.631766000000002	0.0	0.0	0.0	0.0	0.0	8.490961	Yes		A
Triticale.903	Triticale.903.1	1155.0											1.0	Triticale.903	1A	432559100.0	432560254.0	6.155122	0.0	0.0	0.0	0.0	0.0	0.0	Yes	TraesCS1A02G244300.1	A
Triticale.905	Triticale.905.1	1463.0											1.0	Triticale.905	1A	432770058.0	432771688.0	6.2123940000000015	3.095648	1.608786	3.897487	0.0	16.571007	15.872326	Yes		A
Triticale.904	Triticale.904.1	399.0									Triticale.904.1	Triticale.904.1	1.0	Triticale.904	1A	432852667.0	432853065.0	0.0	0.790804	0.376221	3.401754	0.0	0.0	10.513027	Yes		A
Triticale.906	Triticale.906.1	2073.0											1.0	Triticale.906	1A	432972261.0	432975326.0	1.744589	0.481425	0.358957	4.618632	7.260374	0.0	0.0	Yes		A
Triticale.907	Triticale.907.1	1122.0											1.0	Triticale.907	1A	434876919.0	434878258.0	3.220782	0.663937	1.308506	2.513653	4.0472150000000005	0.0	8.116735	Yes		A
Triticale.908	Triticale.908.1	1590.0											1.0	Triticale.908	1A	436422894.0	436426639.0	12.234628	2.772289	3.3892330000000004	1.182882	0.0	0.0	2.661407	Yes	TraesCS1A02G246400.1	A
Triticale.909	Triticale.909.1	1937.0											1.0	Triticale.909	1A	436435966.0	436440510.0	32.978442	4.239802	3.025526	2.368901	2.0310740000000003	0.0	3.819022	Yes	TraesCS1A02G246600.1	A
Triticale.912	Triticale.912.1	2093.0											1.0	Triticale.912	1A	438294114.0	438300921.0	20.060084	43.267127	34.331774	26.740645	26.373298	14.675122	36.263877	Yes		A
Triticale.910	Triticale.910.1	2632.0											1.0	Triticale.910	1A	438365790.0	438368421.0	8.926948	16.263154999999998	6.303647	3.453708	0.529492	14.544868	1.274982	Yes	TraesCS1A02G247100.1	A
Triticale.911	Triticale.911.1	1340.0											1.0	Triticale.911	1A	439070399.0	439074657.0	5.406916000000002	3.766351	2.816161	3.5693650000000003	2.907745	9.583851	21.680284	Yes		A
Triticale.915	Triticale.915.1	1911.0											1.0	Triticale.915	1A	440020037.0	440029413.0	4.602763	2.869819	1.087227	6.835773	1.016635	8.077864	5.897582	Yes	TraesCS1A02G247900.1	A
Triticale.914	Triticale.914.1	345.0									Triticale.914.1	Triticale.914.1	1.0	Triticale.914	1A	440183900.0	440184244.0	4.415630999999999	4.456007	0.536194	0.0	0.0	0.0	9.986832	Yes		A
Triticale.913	Triticale.913.1	1067.0											1.0	Triticale.913	1A	440412865.0	440416040.0	7.971738	0.0	0.0	0.0	0.0	0.0	0.0	Yes	TraesCS1A02G248300.1	A
Triticale.917	Triticale.917.1	2962.0											1.0	Triticale.917	1A	440440919.0	440457450.0	2.331992	0.627143	2.227076	7.105564	0.0	0.0	4.410617	Yes	TraesCS1A02G248400.1	A
Triticale.916	Triticale.916.1	1200.0											1.0	Triticale.916	1A	441183588.0	441185735.0	4.0173260000000015	5.867764	15.315749	4.598224	1.652	0.0	6.942794999999999	Yes	TraesCS1A02G249300.1	A
Triticale.923	Triticale.923.1	2856.0											1.0	Triticale.923	1A	441235400.0	441245178.0	7.526769	5.58519	6.447267	4.622893	1.518736	8.417933999999999	14.829571	Yes	TraesCS1A02G249400.1	A
Triticale.918	Triticale.918.1	1108.0											1.0	Triticale.918	1A	441763861.0	441776165.0	38.951355	5.458544	2.494071	4.416772	3.752219	0.0	9.69553	Yes		A
Triticale.920	Triticale.920.1	627.0											1.0	Triticale.920	1A	441954667.0	441957069.0	63.227873	6.086792	18.037029	8.520315	2.88317	25.746482	15.585007999999998	Yes	TraesCS1A02G250300.1	A
Triticale.919	Triticale.919.1	860.0											1.0	Triticale.919	1A	442125214.0	442126073.0	7.861553	0.0	0.384801	0.0	0.0	0.0	2.024646	Yes		A
Triticale.927	Triticale.927.1	852.0											1.0	Triticale.927	1A	442560610.0	442563284.0	20.804044	0.0	1.351666	1.705151	0.898159	0.0	0.0	Yes		A
Triticale.928	Triticale.928.1	1303.0											1.0	Triticale.928	1A	442563446.0	442567662.0	7.312363	1.974279	3.628089	4.717628	3.826331	0.0	4.705385	Yes	TraesCS1A02G251000.1	A
Triticale.921	Triticale.921.1	1198.0											1.0	Triticale.921	1A	442607190.0	442613310.0	2.59337	1.558504	4.5352510000000015	1.457491	7.337447	3.585312	7.443262	Yes		A
Triticale.922	Triticale.922.1	1191.0											1.0	Triticale.922	1A	442613331.0	442614743.0	11.703291	0.0	0.0	0.0	0.0	0.0	0.0	Yes	TraesCS1A02G251200.1	A
Triticale.925	Triticale.925.1	578.0									Triticale.925.1	Triticale.925.1	1.0	Triticale.925	1A	443124722.0	443125999.0	2.523577	3.163215	3.0673310000000003	0.0	0.0	14.413432	0.0	Yes		A
Triticale.924	Triticale.924.1	1227.0											1.0	Triticale.924	1A	443193549.0	443198146.0	51.604632	10.424172	13.58262	4.698544999999998	12.553923	6.977658	26.188239000000006	Yes	TraesCS1A02G251600.1	A
Triticale.929	Triticale.929.1	2384.0											1.0	Triticale.929	1A	443199030.0	443206842.0	0.91028	1.707327	4.344216	3.334486	4.403179	19.008318	2.890485	Yes		A
Triticale.926	Triticale.926.1	927.0	Triticale.926.1	LTR	Gypsy	tat	no	+	AP|tat	Triticale.926			1.0	Triticale.926	1A	443594103.0	443595029.0	0.0	0.0	0.0	0.0	0.0	0.0	9.613541	No		A
Triticale.930	Triticale.930.1	762.0											1.0	Triticale.930	1A	443708373.0	443711846.0	4.810159	5.6404440000000005	5.908938	1.6782979999999998	0.0	20.71221700000001	3.953801	Yes		A
Triticale.931	Triticale.931.1	1081.0											1.0	Triticale.931	1A	444124496.0	444127602.0	9.697127	0.351874	0.1767359999999999	1.463811	0.0	0.0	2.1183490000000003	Yes	TraesCS1A02G252400.1	A
Triticale.932	Triticale.932.1	1089.0											1.0	Triticale.932	1A	444255168.0	444257615.0	18.769105	8.924682	6.4107980000000016	9.455838	2.126264	0.0	17.665356	Yes	TraesCS1A02G253000.1	A
Triticale.933	Triticale.933.1	1214.0											1.0	Triticale.933	1A	444457635.0	444459834.0	0.0	8.887748	13.877325	1.476205	1.46387	0.0	4.2506330000000005	Yes		A
Triticale.934	Triticale.934.1	2657.0											1.0	Triticale.934	1A	444768511.0	444776725.0	0.731967	20.386783	30.804227	5.7937910000000015	4.259777	51.474991	21.830227	Yes		A
Triticale.936	Triticale.936.1	2659.0											1.0	Triticale.936	1A	445257712.0	445266373.0	4.661015	56.521796	53.905414	17.370864	19.062485	52.67759	25.861854	Yes		A
Triticale.937	Triticale.937.1	3580.0											1.0	Triticale.937	1A	445878955.0	445885083.0	6.210936	3.419674	3.617485	2.030939	3.170569	0.0	0.492262	Yes		A
Triticale.935	Triticale.935.1	507.0											1.0	Triticale.935	1A	446516062.0	446516733.0	64.59313399999999	0.355628	0.421689	0.763451	2.521473	0.0	0.0	No		A
Triticale.938	Triticale.938.1	2080.0											1.0	Triticale.938	1A	446542046.0	446549281.0	1.008573	12.189783	4.548857	33.046318	47.470336	0.0	0.0	Yes	TraesCS1A02G255000.1	A
Triticale.940	Triticale.940.1	2380.0											1.0	Triticale.940	1A	447004960.0	447007962.0	9.441885	2.510304	0.775822	0.0	0.0	11.603418	0.0	Yes	TraesCS1A02G255100.1	A
Triticale.939	Triticale.939.1	1782.0											1.0	Triticale.939	1A	447628322.0	447635000.0	2.598871	6.586036	0.696879	3.410302	2.581589	0.0	0.0	Yes		A
Triticale.943	Triticale.943.1	1493.0											1.0	Triticale.943	1A	447640691.0	447643380.0	3.924885	5.083814	2.2360900000000004	0.0	47.155467	0.0	5.435384	Yes		A
Triticale.941	Triticale.941.1	2225.0											1.0	Triticale.941	1A	448627118.0	448631478.0	6.118586	4.121065	2.1752740000000004	6.160768	0.0	0.0	5.1103510000000005	Yes		A
Triticale.942	Triticale.942.1	2008.0											1.0	Triticale.942	1A	448912449.0	448915584.0	6.480645	1.6847900000000002	0.95202	2.712276	2.405807	0.0	2.5278150000000004	Yes	TraesCS1A02G256200.1	A
Triticale.945	Triticale.945.1	2837.0											2.0	Triticale.945	1A	448918314.0	448924958.0	15.364242	14.01934	8.773292	13.488075	11.073032	7.0619190000000005	7.279389	Yes	TraesCS1A02G256300.1	A
Triticale.945	Triticale.945.2	2810.0											2.0	Triticale.945	1A	448918314.0	448924958.0	15.364242	14.01934	8.773292	13.488075	11.073032	7.0619190000000005	7.279389	Yes	TraesCS1A02G256300.3	A
Triticale.944	Triticale.944.1	1077.0											1.0	Triticale.944	1A	448926775.0	448930744.0	15.0224	4.4863610000000005	2.108651	1.087687	0.0	0.0	0.0	Yes	TraesCS1A02G256400.1	A
Triticale.946	Triticale.946.1	1751.0											1.0	Triticale.946	1A	449195902.0	449200643.0	2.741908	0.0	0.5583239999999999	0.0	0.0	0.0	11.752009	Yes		A
Triticale.947	Triticale.947.1	1581.0											1.0	Triticale.947	1A	449853528.0	449856508.0	2.349241	9449-04-01	6.22291	16.634121	42.972785	0.0	10.619445	Yes		A
Triticale.948	Triticale.948.1	1595.0											1.0	Triticale.948	1A	449934516.0	449938594.0	18.282349	6.507397	5.219303	8.206105	7.714686	11.44941	22.521249	Yes	TraesCS1A02G258200.1	A
Triticale.949	Triticale.949.1	1813.0											1.0	Triticale.949	1A	450094493.0	450096396.0	28.941624	0.710546	1.7945779999999998	11.285223	5.165271	0.0	0.0	Yes		A
Triticale.950	Triticale.950.1	505.0											1.0	Triticale.950	1A	450980272.0	450980902.0	18.168487	0.7594850000000001	1.837558	4.94325	0.0	0.0	4.962903	No		A
Triticale.951	Triticale.951.1	1718.0											1.0	Triticale.951	1A	452018321.0	452021160.0	39.867636	1.988977	2.964612	6.580413	2.273215	17.57633	22.250963	Yes	TraesCS1A02G258800.1	A
Triticale.952	Triticale.952.1	1252.0											1.0	Triticale.952	1A	452042146.0	452046460.0	7.232382	0.0	0.290662	2.855991	0.0	8.070138	1.614093	Yes	TraesCS1A02G259000.1	A
Triticale.953	Triticale.953.1	967.0											1.0	Triticale.953	1A	452051801.0	452052767.0	170.066328	105.153992	79.160857	190.992779	95.760327	59.263505	174.719748	Yes		A
Triticale.954	Triticale.954.1	647.0									Triticale.954.1	Triticale.954.1	1.0	Triticale.954	1A	452280749.0	452281485.0	2.782516	0.737024	2.1455330000000004	3.236361	0.0	30.609055	13.879981	Yes		A
Triticale.955	Triticale.955.1	1505.0											1.0	Triticale.955	1A	452758835.0	452760436.0	4.286503	2.629357	3.707092	3.204098	0.0	14.413432	2.916893	Yes		A
Triticale.956	Triticale.956.1	853.0											1.0	Triticale.956	1A	452784057.0	452786582.0	36.40730900000001	0.0	0.0	0.0	0.0	0.0	0.0	Yes	TraesCS1A02G259700.1	A
Triticale.958	Triticale.958.1	1887.0											2.0	Triticale.958	1A	452857082.0	452865313.0	36.163597	0.65322	0.274176	0.0	5.114403	0.0	2.0130220000000003	Yes	TraesCS1A02G259800.1	A
Triticale.958	Triticale.958.2	1937.0											2.0	Triticale.958	1A	452857082.0	452865313.0	36.163597	0.65322	0.274176	0.0	5.114403	0.0	2.0130220000000003	Yes		A
Triticale.957	Triticale.957.1	499.0									Triticale.957.1	Triticale.957.1	1.0	Triticale.957	1A	454036459.0	454038292.0	5.214180000000002	3.984129	6.625014	6.140593	1.096925	0.0	9.146378	Yes		A
Triticale.960	Triticale.960.1	1445.0											1.0	Triticale.960	1A	454518793.0	454521071.0	0.609296	0.0	1.346294	0.0	0.0	0.0	6.882988	Yes		A
Triticale.961	Triticale.961.1	1585.0											1.0	Triticale.961	1A	454521581.0	454523529.0	2.189934	0.0	1.516286	0.0	0.0	0.0	10.269739	Yes		A
Triticale.959	Triticale.959.1	723.0											1.0	Triticale.959	1A	454536385.0	454537107.0	0.0	63.11991999999999	57.406515	5.761666	15.407982999999998	163.511706	15.033581	Yes	TraesCS1A02G260800.1	A
Triticale.962	Triticale.962.1	2028.0											1.0	Triticale.962	1A	455022643.0	455028340.0	20.225852	42.481913	41.93786	40.354399	31.004356	13.318919	33.208744	Yes		A
Triticale.963	Triticale.963.1	1928.0											1.0	Triticale.963	1A	455031001.0	455038358.0	23.692072	93.311557	72.670433	80.15447900000002	67.240275	61.092613	39.567152	Yes	TraesCS1A02G261000.1	A
Triticale.966	Triticale.966.1	1625.0											1.0	Triticale.966	1A	455818485.0	455821422.0	2.821659	1.202995	0.695858	2.612816	0.0	0.0	9.227929	Yes		A
Triticale.964	Triticale.964.1	837.0											1.0	Triticale.964	1A	456650827.0	456651663.0	72.586085	0.0	0.057517	0.0	0.0	0.0	1.620098	Yes		A
Triticale.965	Triticale.965.1	811.0											1.0	Triticale.965	1A	456653642.0	456654452.0	42.36787	0.493399	0.0	0.0	0.0	0.0	1.86071	Yes	TraesCS1A02G262000.1	A
Triticale.967	Triticale.967.1	926.0											1.0	Triticale.967	1A	456926494.0	456931844.0	2.308051	0.612318	0.0	2.570616	5.388025	0.0	9.675206	Yes	TraesCS1A02G262200.1	A
Triticale.970	Triticale.970.1	2166.0											1.0	Triticale.970	1A	456940070.0	456944304.0	19.699049	13.120187	10.013541	4.1030690000000005	14.0785	11.784941	20.735131	Yes	TraesCS1A02G262300.1	A
Triticale.968	Triticale.968.1	1028.0											1.0	Triticale.968	1A	457372131.0	457373461.0	203.540687	0.237703	0.0	2.20608	0.0	3.855737	0.0	Yes		A
Triticale.969	Triticale.969.1	1731.0											1.0	Triticale.969	1A	457821977.0	457824117.0	2.6407380000000003	7.370327	4.86048	4.765754	20.367691	4.712889	20.812778	No		A
Triticale.971	Triticale.971.1	398.0									Triticale.971.1	Triticale.971.1	1.0	Triticale.971	1A	457945850.0	457946247.0	137.018415	0.0	1.021969	2.917607	0.0	0.0	14.741963	Yes		A
Triticale.972	Triticale.972.1	1096.0											1.0	Triticale.972	1A	458216592.0	458220129.0	13.216152	0.649383	0.306093	0.0	1.430908	0.0	0.0	Yes		A
Triticale.974	Triticale.974.1	1092.0											2.0	Triticale.974	1A	458226361.0	458230287.0	8.155027	1.029783	0.533199	0.0	14.692007	0.0	4.7496800000000015	Yes		A
Triticale.974	Triticale.974.2	1532.0											2.0	Triticale.974	1A	458226361.0	458230287.0	8.155027	1.029783	0.533199	0.0	14.692007	0.0	4.7496800000000015	Yes		A
Triticale.973	Triticale.973.1	1538.0											1.0	Triticale.973	1A	458394134.0	458397267.0	10.858299	0.0	0.0	0.0	0.0	0.0	0.0	Yes	TraesCS1A02G262900.1	A
Triticale.975	Triticale.975.1	890.0											1.0	Triticale.975	1A	458564117.0	458566532.0	102.680592	7.829846000000001	13.856978	14.72369	7.428767	7.174328999999998	37.906716	Yes	TraesCS1A02G263300.1	A
Triticale.976	Triticale.976.1	330.0									Triticale.976.1	Triticale.976.1	1.0	Triticale.976	1A	458904469.0	458906047.0	2.28115	0.0	3.225553	1.705151	0.0	14.413432	0.0	Yes		A
Triticale.977	Triticale.977.1	1439.0											1.0	Triticale.977	1A	459186662.0	459188632.0	9.726113	0.0	0.0	0.0	0.653151	0.0	0.0	Yes	TraesCS1A02G263700.1	A
Triticale.982	Triticale.982.1	3320.0											1.0	Triticale.982	1A	459307640.0	459313757.0	14.086766	4.859155	2.394544	6.549937	0.0	5.535277	18.381404	Yes	TraesCS1A02G264000.2	A
Triticale.978	Triticale.978.1	1372.0											1.0	Triticale.978	1A	459514100.0	459519904.0	3.320088	1.453649	3.286207	4.045383999999999	16.200969	0.0	2.484343	Yes		A
Triticale.980	Triticale.980.1	1620.0											1.0	Triticale.980	1A	459524475.0	459527958.0	0.845924	11.209398	12.062427	0.0	0.0	0.0	7.953607000000001	Yes		A
Triticale.981	Triticale.981.1	1033.0											1.0	Triticale.981	1A	459946840.0	459948904.0	12.394792	2.770492	3.172384	0.947489	0.0	0.0	0.0	Yes	TraesCS1A02G264300.1	A
Triticale.979	Triticale.979.1	325.0									Triticale.979.1	Triticale.979.1	1.0	Triticale.979	1A	460003865.0	460004189.0	5.958119	0.0	0.0	0.0	0.0	0.0	0.0	No		A
Triticale.983	Triticale.983.1	728.0											1.0	Triticale.983	1A	461337578.0	461338417.0	14.192876	1.262245	5.112778	5.288778	24.851479	0.0	10.799121	Yes	TraesCS1A02G265600.1	A
Triticale.984	Triticale.984.1	601.0											1.0	Triticale.984	1A	461351279.0	461352000.0	0.0	0.0	0.0	1.702314	3.5561519999999995	0.0	103.393635	Yes	TraesCS1A02G265700.1	A
Triticale.985	Triticale.985.1	615.0											1.0	Triticale.985	1A	461356735.0	461357498.0	26.356361	0.0	1.567445	8.118183	5.164491	0.0	29.907896	Yes	TraesCS1A02G265800.1	A
Triticale.986	Triticale.986.1	619.0											1.0	Triticale.986	1A	461372711.0	461373455.0	0.0	0.71926	0.6969029999999999	7.674557000000001	7.609412	0.0	21.224734	Yes	TraesCS1A02G265900.1	A
Triticale.987	Triticale.987.1	1662.0											1.0	Triticale.987	1A	461521743.0	461524132.0	10.028971	0.0	0.0	0.0	0.0	8.776411	0.0	Yes	TraesCS1A02G266000.1	A
Triticale.988	Triticale.988.1	1613.0											1.0	Triticale.988	1A	461641601.0	461644055.0	7.720838	0.0	0.0	0.0	0.0	0.0	0.0	Yes	TraesCS1A02G266100.1	A
Triticale.989	Triticale.989.1	2608.0											1.0	Triticale.989	1A	461775716.0	461779792.0	21.911631	28.995329	19.602411	41.122382	42.316952	43.51109500000001	17.763174	Yes		A
Triticale.991	Triticale.991.1	413.0											1.0	Triticale.991	1A	462127698.0	462129188.0	0.0	6.246009	8.671833	14.681638	41.595643	0.0	0.0	No		A
Triticale.990	Triticale.990.1	1830.0											1.0	Triticale.990	1A	462333927.0	462336501.0	6.950974	0.0	0.0	0.0	0.0	0.0	0.0	Yes	TraesCS1A02G266900.1	A
Triticale.993	Triticale.993.1	1993.0											1.0	Triticale.993	1A	462434419.0	462438266.0	8.444823	31.599611	45.81286400000001	26.757096	25.429877	25.760478	54.373143000000006	Yes	TraesCS1A02G267300.1	A
Triticale.994	Triticale.994.1	1022.0											1.0	Triticale.994	1A	462775850.0	462778584.0	46.958936	0.0	0.257042	1.293045	0.0	0.0	0.0	Yes	TraesCS1A02G267800.1	A
Triticale.992	Triticale.992.1	453.0									Triticale.992.1	Triticale.992.1	1.0	Triticale.992	1A	463155713.0	463156165.0	3.199208	0.0	0.0	0.0	0.0	0.0	9.178284	Yes		A
Triticale.996	Triticale.996.1	546.0											1.0	Triticale.996	1A	463194906.0	463195543.0	0.0	9.479507	5.1056620000000015	0.0	0.0	24.603151	9.045173	Yes	TraesCS1A02G268300.1	A
Triticale.995	Triticale.995.1	445.0											1.0	Triticale.995	1A	463246644.0	463247478.0	5.089682	0.0	0.0	0.0	0.0	0.0	8.288016	Yes		A
Triticale.998	Triticale.998.1	816.0											1.0	Triticale.998	1A	463288271.0	463289275.0	5.476479	2.534255	1.15208	0.0	3.2127380000000003	13.01801	6.634233999999998	Yes		A
Triticale.999	Triticale.999.1	1090.0											1.0	Triticale.999	1A	463812441.0	463813842.0	0.0	0.0	2.335636	1.229586	0.0	0.0	14.599517	Yes		A
Triticale.1000	Triticale.1000.1	2067.0											1.0	Triticale.1000	1A	463929756.0	463932776.0	6.005945	0.0	0.0	0.0	0.0	0.0	0.0	Yes	TraesCS1A02G269500.1	A
Triticale.1002	Triticale.1002.1	1711.0											1.0	Triticale.1002	1A	464249651.0	464253829.0	8.60235	4.570577	3.406769	2.109763	17.774991	0.0	20.901869	Yes		A
Triticale.1001	Triticale.1001.1	2136.0											1.0	Triticale.1001	1A	464790700.0	464793947.0	23.610705	2.777809	3.002757	3.598699	5.364546	12.38908	25.435662	Yes	TraesCS1A02G270400.1	A
Triticale.1003	Triticale.1003.1	943.0											1.0	Triticale.1003	1A	464809426.0	464811387.0	22.114984	1.484329	0.197776	1.508054	0.0	5.6553260000000005	6.289098	Yes		A
Triticale.1004	Triticale.1004.1	614.0											1.0	Triticale.1004	1A	465252062.0	465252775.0	47.172919	93.885401	79.258031	73.629752	18.841211	69.109349	17.753972	Yes	TraesCS1A02G271600.1	A
Triticale.1005	Triticale.1005.1	1279.0											1.0	Triticale.1005	1A	465501523.0	465505875.0	8.928338	3.155177	1.684334	2.651716	3.694004	0.0	0.0	Yes	TraesCS1A02G272400.1	A
Triticale.1006	Triticale.1006.1	332.0									Triticale.1006.1	Triticale.1006.1	1.0	Triticale.1006	1A	465928179.0	465928510.0	6.3498730000000005	0.0	0.0	0.0	0.0	0.0	0.0	No		A
Triticale.1007	Triticale.1007.1	359.0									Triticale.1007.1	Triticale.1007.1	1.0	Triticale.1007	1A	466770070.0	466770428.0	0.0	0.0	0.0	0.0	0.0	0.0	10.008898	No		A
Triticale.1008	Triticale.1008.1	766.0											2.0	Triticale.1008	1A	466903939.0	466913273.0	0.324026	40.06130200000001	37.470496	2.255812	1.722347	13.033086	11.87719	No		A
Triticale.1008	Triticale.1008.2	898.0											2.0	Triticale.1008	1A	466903939.0	466913273.0	0.324026	40.06130200000001	37.470496	2.255812	1.722347	13.033086	11.87719	No		A
Triticale.1009	Triticale.1009.1	697.0											1.0	Triticale.1009	1A	467181438.0	467183972.0	17.618459	3.06791	9.452312	5.942342	3.177433	0.0	0.0	Yes		A
Triticale.1011	Triticale.1011.1	1514.0											1.0	Triticale.1011	1A	467257745.0	467260124.0	1.928713	2.702522	1.7488860000000002	14.143517999999998	0.0	0.0	3.892791	Yes	TraesCS1A02G273900.1	A
Triticale.1010	Triticale.1010.1	411.0											1.0	Triticale.1010	1A	468598785.0	468599195.0	130.34364	0.0	0.261938	0.0	0.0	0.0	0.0	Yes	TraesCS1A02G274300.1	A
Triticale.1012	Triticale.1012.1	1486.0											1.0	Triticale.1012	1A	468605612.0	468609092.0	43.656925	347.610386	429.153004	378.436784	208.53124	222.399453	65.48923	Yes	TraesCS1A02G274400.1	A
Triticale.1013	Triticale.1013.1	1327.0											1.0	Triticale.1013	1A	469309603.0	469310929.0	11.044967	0.245525	0.0	0.0	0.0	0.0	0.0	Yes	TraesCS1A02G275000.1	A
Triticale.1014	Triticale.1014.1	1312.0											1.0	Triticale.1014	1A	469369455.0	469371619.0	17.222245	16.9408	33.412313	57.274616	31.700301	9.579657	30.33097	Yes	TraesCS1A02G275200.1	A
Triticale.1015	Triticale.1015.1	1501.0											1.0	Triticale.1015	1A	469374606.0	469377035.0	5.874396	2.1516610000000003	2.487325	4.069188	0.0	6.040006	0.0	Yes		A
Triticale.1019	Triticale.1019.1	2731.0											1.0	Triticale.1019	1A	471320624.0	471326066.0	8.040028	2.216915	1.568476	3.821136	0.0	0.0	0.0	Yes	TraesCS1A02G276100.3	A
Triticale.1016	Triticale.1016.1	1045.0											1.0	Triticale.1016	1A	471487826.0	471489487.0	19.812678	17.150980999999998	17.685405	14.801363	3.304733	30.64751	24.730679	Yes	TraesCS1A02G276300.1	A
Triticale.1017	Triticale.1017.1	1345.0											1.0	Triticale.1017	1A	471503820.0	471507202.0	3.381154	0.0	0.300439	1.612604	0.0	0.0	13.510595	Yes	TraesCS1A02G276500.1	A
Triticale.1018	Triticale.1018.1	1090.0											1.0	Triticale.1018	1A	472061256.0	472062345.0	0.0	0.0	0.0	0.0	0.0	0.0	9.332844	No		A
Triticale.1020	Triticale.1020.1	752.0											1.0	Triticale.1020	1A	473009749.0	473011946.0	259.010051	59.433317	95.144407	66.435132	16.829831	207.97893	632.004266	Yes		A
Triticale.1021	Triticale.1021.1	907.0											2.0	Triticale.1021	1A	473032238.0	473034750.0	38.527099	41.049218	52.60355300000001	85.80188100000002	43.641113	36.693123	59.860705	Yes	TraesCS1A02G277600.1	A
Triticale.1021	Triticale.1021.2	896.0											2.0	Triticale.1021	1A	473032238.0	473034750.0	38.527099	41.049218	52.60355300000001	85.80188100000002	43.641113	36.693123	59.860705	Yes		A
Triticale.1023	Triticale.1023.1	4485.0											1.0	Triticale.1023	1A	473630538.0	473639728.0	3.4135910000000003	1.894579	2.143677	12.929873	7.141560000000001	3.628264	8.118635000000001	Yes		A
Triticale.1022	Triticale.1022.1	477.0									Triticale.1022.1	Triticale.1022.1	1.0	Triticale.1022	1A	473970535.0	473971011.0	0.0	0.905197	4.5202480000000005	8.911827	0.0	0.0	0.0	No		A
Triticale.1024	Triticale.1024.1	2145.0											1.0	Triticale.1024	1A	474189044.0	474194974.0	5.298323	3.968765	3.3766519999999995	1.620888	25.073326	0.0	10.535483	Yes		A
Triticale.1028	Triticale.1028.1	2471.0											1.0	Triticale.1028	1A	474197441.0	474201439.0	6.688149	0.302112	0.6572	4.138321	0.0	9.216193	13.414011	Yes	TraesCS1A02G278200.3	A
Triticale.1025	Triticale.1025.1	900.0											1.0	Triticale.1025	1A	474219697.0	474220596.0	11.039304	0.0	0.0	0.0	0.0	0.0	2.175027	Yes		A
Triticale.1026	Triticale.1026.1	1587.0											1.0	Triticale.1026	1A	474430833.0	474432419.0	10.171719	0.0	0.0	0.0	0.0	0.0	0.0	Yes	TraesCS1A02G278800.1	A
Triticale.1030	Triticale.1030.1	2177.0											1.0	Triticale.1030	1A	474640548.0	474644085.0	14.003532	7.60145	1.0955979999999998	6.8715160000000015	6.693528	7.421894	1.970453	Yes	TraesCS1A02G279000.4	A
Triticale.1027	Triticale.1027.1	2299.0											1.0	Triticale.1027	1A	474699335.0	474703163.0	40.56962	2.723612	2.4530000000000003	1.709601	1.53113	0.0	0.0	Yes	TraesCS1A02G279100.1	A
Triticale.1029	Triticale.1029.1	1075.0											1.0	Triticale.1029	1A	476908633.0	476911191.0	11.095016	0.0	0.619562	0.0	0.0	0.0	0.0	Yes		A
Triticale.1031	Triticale.1031.1	1587.0											1.0	Triticale.1031	1A	477730922.0	477734715.0	13.706803	0.0	0.29762	0.0	0.0	0.0	0.0	Yes	TraesCS1A02G280300.1	A
Triticale.1032	Triticale.1032.1	1940.0											1.0	Triticale.1032	1A	478256374.0	478258684.0	13.922171	0.0	0.0	0.0	0.0	0.0	1.291888	Yes	TraesCS1A02G280500.1	A
Triticale.1033	Triticale.1033.1	821.0											1.0	Triticale.1033	1A	478450752.0	478452764.0	269.351855	1.234848	1.741143	1.275228	0.0	0.0	12.943445	Yes		A
Triticale.1034	Triticale.1034.1	872.0											2.0	Triticale.1034	1A	478626121.0	478628873.0	0.884808	0.0	0.0	11.472175	4.949433999999999	0.0	11.180696	Yes	TraesCS1A02G281000.1	A
Triticale.1034	Triticale.1034.2	671.0											2.0	Triticale.1034	1A	478626121.0	478628873.0	0.884808	0.0	0.0	11.472175	4.949433999999999	0.0	11.180696	Yes		A
Triticale.1035	Triticale.1035.1	1415.0											1.0	Triticale.1035	1A	479817767.0	479820086.0	16.554341	1.445802	0.621516	0.0	0.0	0.0	0.0	Yes	TraesCS1A02G281300.1	A
Triticale.1040	Triticale.1040.1	2707.0											1.0	Triticale.1040	1A	479827467.0	479840347.0	5.905691	13.031172	5.76239	4.61279	17.527879000000002	15.047046	12.809816	Yes		A
Triticale.1041	Triticale.1041.1	2001.0	Triticale.1041.1	LTR	Copia	retrofit	no	+	INT|retrofit	Triticale.1041			1.0	Triticale.1041	1A	479833467.0	479835631.0	2.869359	9.690013	17.902742	4.703865	0.0	48.959574	4.9625650000000014	Yes		A
Triticale.1036	Triticale.1036.1	1271.0											1.0	Triticale.1036	1A	480424581.0	480428658.0	9.928332	7.040082000000001	2.992905	6.942688	0.0	6.180422	10.656485	Yes	TraesCS1A02G281600.1	A
Triticale.1037	Triticale.1037.1	1417.0											1.0	Triticale.1037	1A	480546650.0	480549947.0	8.254227	7.725544	18.351392	1.545105	4.458794	0.0	3.340072	Yes	TraesCS1A02G281800.1	A
Triticale.1038	Triticale.1038.1	1243.0											1.0	Triticale.1038	1A	480563832.0	480566961.0	0.914464	4.584499	7.084641	0.0	0.0	0.0	0.0	Yes		A
Triticale.1039	Triticale.1039.1	1406.0											1.0	Triticale.1039	1A	480571080.0	480574092.0	2.540837	28.192208	46.764904	4.17192	6.344169	0.0	3.809029	Yes	TraesCS1A02G282000.1	A
Triticale.1044	Triticale.1044.1	881.0											1.0	Triticale.1044	1A	480602766.0	480604094.0	1.52406	10.176141	6.28491	8.365111	7.046855	0.0	0.0	Yes		A
Triticale.1045	Triticale.1045.1	1319.0											1.0	Triticale.1045	1A	480604085.0	480605860.0	9.282742	0.200371	0.236306	0.0	0.0	0.0	0.0	Yes	TraesCS1A02G282600.1	A
Triticale.1042	Triticale.1042.1	1154.0											1.0	Triticale.1042	1A	480755103.0	480758455.0	5979-02-01	4.365182	0.197419	0.0	2.307631	0.0	17.013257	Yes		A
Triticale.1046	Triticale.1046.1	1096.0											1.0	Triticale.1046	1A	480830929.0	480833820.0	5.123057	23.190175	7.702136	7.5533839999999985	0.0	16.280865	14.972123000000002	Yes		A
Triticale.1043	Triticale.1043.1	439.0											1.0	Triticale.1043	1A	481248627.0	481249065.0	3.651882	9.422993	6.408812	6.610858	5.364722	0.0	0.0	No		A
Triticale.1047	Triticale.1047.1	950.0											1.0	Triticale.1047	1A	481289053.0	481292849.0	11.832637	0.0	0.0	0.0	0.0	0.0	0.0	Yes	TraesCS1A02G283600.1	A
Triticale.1049	Triticale.1049.1	1860.0											1.0	Triticale.1049	1A	481651723.0	481655254.0	6.238846	4.546696	1.187961	8.487250999999999	2.43364	10.097157	2.941707	Yes		A
Triticale.1048	Triticale.1048.1	1197.0											1.0	Triticale.1048	1A	481684778.0	481685974.0	0.0	4.485185	0.727424	0.802006	8.82974	0.0	0.0	No		A
Triticale.1050	Triticale.1050.1	534.0											1.0	Triticale.1050	1A	481881504.0	481882194.0	0.93687	0.0	0.0	0.0	0.0	0.0	6.797996	Yes		A
Triticale.1051	Triticale.1051.1	1629.0											1.0	Triticale.1051	1A	481932807.0	481934435.0	7.694557	0.0	0.0	0.0	0.0	0.0	0.0	Yes		A
Triticale.1053	Triticale.1053.1	705.0											1.0	Triticale.1053	1A	482277059.0	482279283.0	95.99698	42.267057	87.468714	261.538716	39.060337	401.102296	380.982385	Yes		A
Triticale.1052	Triticale.1052.1	1384.0											1.0	Triticale.1052	1A	482328543.0	482329926.0	19.703721	16.529168	3.260453	2.0267150000000003	1.597593	0.0	0.0	Yes	TraesCS1A02G284900.1	A
Triticale.1054	Triticale.1054.1	2388.0											1.0	Triticale.1054	1A	482335686.0	482339114.0	106.742567	2.582033	4.294714	4.877675	0.206595	0.0	25.221749	Yes	TraesCS1A02G285000.2	A
Triticale.1056	Triticale.1056.1	1007.0											1.0	Triticale.1056	1A	482758866.0	482761993.0	21.010533	38.704621	26.611039	13.438012	8.754189	0.0	46.004319	Yes	TraesCS1A02G285200.1	A
Triticale.1055	Triticale.1055.1	655.0											1.0	Triticale.1055	1A	482767930.0	482768584.0	8.102291000000001	0.0	0.020835	0.0	0.0	0.0	0.0	Yes		A
Triticale.1057	Triticale.1057.1	1161.0											1.0	Triticale.1057	1A	482780630.0	482783378.0	3.240327	12.537747	1.240063	1.5803120000000002	3.250596	0.0	0.0	Yes	TraesCS1A02G285600.1	A
Triticale.1058	Triticale.1058.1	915.0											1.0	Triticale.1058	1A	482966406.0	482969358.0	11.169156	10.458488	5217-11-01	12.733658	10.218832	8.947353999999997	7.657914999999999	Yes	TraesCS1A02G286000.1	A
Triticale.1059	Triticale.1059.1	1388.0											1.0	Triticale.1059	1A	483026385.0	483029884.0	20.806698	0.967424	2.720684	1.899253	12.013579	0.0	5.546251	Yes		A
Triticale.1061	Triticale.1061.1	804.0											1.0	Triticale.1061	1A	483033163.0	483035128.0	127.342828	41.616538	63.650053	82.65528499999998	9.791024	47.417322	101.746928	Yes	TraesCS1A02G286300.1	A
Triticale.1060	Triticale.1060.1	1003.0											1.0	Triticale.1060	1A	483678247.0	483679340.0	53.031061	1.3340379999999998	1.041974	1.851356	3.748294	4.857168	1.083678	Yes	TraesCS1A02G286900.1	A
Triticale.1065	Triticale.1065.1	4045.0											1.0	Triticale.1065	1A	484328688.0	484336579.0	4.6270050000000005	5.305716	1.670632	2.07316	8.696923	0.0	1.682691	Yes		A
Triticale.1063	Triticale.1063.1	629.0											1.0	Triticale.1063	1A	485010521.0	485011149.0	39.878994	0.0	0.040981	0.924413	0.0	0.0	0.0	Yes	TraesCS1A02G287700.1	A
Triticale.1062	Triticale.1062.1	591.0											1.0	Triticale.1062	1A	485012383.0	485012973.0	28.708349	0.0	0.536858	0.0	1.133339	7.072584	0.0	Yes	TraesCS1A02G287800.1	A
Triticale.1066	Triticale.1066.1	3399.0											1.0	Triticale.1066	1A	485354194.0	485357687.0	8.089209	4.05825	3.988782	6.496028	5.572208	2.200816	6.842645	Yes		A
Triticale.1069	Triticale.1069.1	1380.0											2.0	Triticale.1069	1A	485359294.0	485363317.0	16.559689000000002	3.750479	4.983353	4.797811	16.256922	0.0	67.78316	Yes	TraesCS1A02G288500.1	A
Triticale.1069	Triticale.1069.2	845.0											2.0	Triticale.1069	1A	485359294.0	485363317.0	16.559689000000002	3.750479	4.983353	4.797811	16.256922	0.0	67.78316	Yes		A
Triticale.1068	Triticale.1068.1	2331.0											1.0	Triticale.1068	1A	485557993.0	485561716.0	3.972356	8.972281	2.972401	3.896024	5.213934	0.0	2.3948400000000003	Yes		A
Triticale.1067	Triticale.1067.1	710.0											1.0	Triticale.1067	1A	485600376.0	485601085.0	0.0	0.0	0.0	0.0	0.0	0.0	10.470953	No		A
Triticale.1071	Triticale.1071.1	773.0											1.0	Triticale.1071	1A	486052173.0	486054559.0	71.771625	20.084164	6.971384	15.873566	5.976971	38.65335	14.743746	Yes	TraesCS1A02G288800.1	A
Triticale.1070	Triticale.1070.1	2553.0											1.0	Triticale.1070	1A	486331146.0	486334229.0	4.586518	0.387503	0.8815299999999999	10.396546	1.957819	0.0	0.0	Yes		A
Triticale.1075	Triticale.1075.1	1502.0											2.0	Triticale.1075	1A	486338882.0	486343227.0	8.575306	16.952262	14.421371	3.335376	12.897514	0.0	6.17916	Yes		A
Triticale.1075	Triticale.1075.2	1306.0											2.0	Triticale.1075	1A	486338882.0	486343227.0	8.575306	16.952262	14.421371	3.335376	12.897514	0.0	6.17916	Yes		A
Triticale.1072	Triticale.1072.1	1675.0											1.0	Triticale.1072	1A	486517204.0	486518878.0	0.0	0.0	0.0	0.0	0.0	0.0	5401-10-01	No		A
Triticale.1073	Triticale.1073.1	949.0											1.0	Triticale.1073	1A	486944566.0	486952680.0	46.273657	111.179164	122.598246	35.765047	37.925288	70.381291	108.390349	No		A
Triticale.1074	Triticale.1074.1	786.0											1.0	Triticale.1074	1A	487011710.0	487014009.0	1.843819	4.598936	0.744639	0.629127	0.0	0.0	7.296938000000001	Yes		A
Triticale.1076	Triticale.1076.1	746.0											1.0	Triticale.1076	1A	487463159.0	487465225.0	5.616667	0.0	5.713003	5.060596	5.273714	22.431624	5.262204	Yes		A
Triticale.1077	Triticale.1077.1	1225.0											1.0	Triticale.1077	1A	487485615.0	487493013.0	9.94409	11.914991	4.554118	10.010975	2.794153	0.0	4.6302660000000015	Yes	TraesCS1A02G291400.1	A
Triticale.1079	Triticale.1079.1	1361.0											1.0	Triticale.1079	1A	487563376.0	487565857.0	0.255864	3.051073	2.116784	6.538708	19.237125	0.0	1.546852	No		A
Triticale.1078	Triticale.1078.1	861.0											1.0	Triticale.1078	1A	487568669.0	487569529.0	31.285408	0.076233	0.357498	0.0	0.0	0.0	0.0	Yes		A
Triticale.1080	Triticale.1080.1	626.0											1.0	Triticale.1080	1A	487571261.0	487571886.0	46.154691	0.90576	0.707883	0.0	0.0	6.4699300000000015	3.750762	Yes	TraesCS1A02G291600.1	A
Triticale.1081	Triticale.1081.1	763.0											1.0	Triticale.1081	1A	487604496.0	487605258.0	37.625069	0.064259	1.44226	0.0	0.0	0.0	1.182509	Yes	TraesCS1A02G291700.1	A
Triticale.1082	Triticale.1082.1	1792.0											1.0	Triticale.1082	1A	487728627.0	487733105.0	1.647312	0.0	1.6453220000000002	0.0	0.0	7.391711999999999	9.669381	Yes		A
Triticale.1083	Triticale.1083.1	993.0											2.0	Triticale.1083	1A	488065244.0	488071113.0	11.482726	6.8063970000000005	15.683554999999998	2.659897	0.0	8.157455	7.316750999999999	Yes		A
Triticale.1083	Triticale.1083.2	865.0											2.0	Triticale.1083	1A	488065244.0	488071113.0	11.482726	6.8063970000000005	15.683554999999998	2.659897	0.0	8.157455	7.316750999999999	Yes		A
Triticale.1084	Triticale.1084.1	1564.0											1.0	Triticale.1084	1A	488108899.0	488112001.0	6.369945	0.0	0.0	0.0	0.0	0.0	0.0	Yes	TraesCS1A02G292700.1	A
Triticale.1085	Triticale.1085.1	779.0											1.0	Triticale.1085	1A	488219161.0	488219939.0	68.79454399999999	0.0	0.0	0.0	0.0	0.0	0.0	Yes	TraesCS1A02G293000.1	A
Triticale.1086	Triticale.1086.1	522.0									Triticale.1086.1	Triticale.1086.1	1.0	Triticale.1086	1A	489237178.0	489239673.0	3.81385	0.0	0.379071	0.0	1.800545	14.413432	0.0	Yes	TraesCS1A02G294000.1	A
Triticale.1087	Triticale.1087.1	641.0											1.0	Triticale.1087	1A	490418259.0	490418899.0	47.657686	1.001767	0.298644	0.0	0.0	0.0	6.856785	Yes	TraesCS1A02G295400.1	A
Triticale.1092	Triticale.1092.1	2519.0											1.0	Triticale.1092	1A	490509793.0	490525089.0	43.230904	3.0175490000000003	4.152931	35.89007700000001	0.0	1.699401	5.159051	Yes	TraesCS1A02G295600.1	A
Triticale.1088	Triticale.1088.1	554.0											1.0	Triticale.1088	1A	490760009.0	490760562.0	8.484923	0.0	0.0	0.0	0.0	0.0	0.0	Yes	TraesCS1A02G295700.1	A
Triticale.1089	Triticale.1089.1	342.0									Triticale.1089.1	Triticale.1089.1	1.0	Triticale.1089	1A	490796283.0	490796716.0	0.0	0.0	0.701615	0.0	0.0	0.0	13.314298999999998	Yes		A
Triticale.1091	Triticale.1091.1	1905.0											1.0	Triticale.1091	1A	490893557.0	490895461.0	25.863258	0.0	0.219085	0.0	0.0	0.0	1.864034	Yes	TraesCS1A02G295900.1	A
Triticale.1090	Triticale.1090.1	2264.0											1.0	Triticale.1090	1A	491128088.0	491130351.0	5.936074	2.549154	2.13864	1.265306	0.0	9.982455	1.780536	Yes		A
Triticale.1093	Triticale.1093.1	1616.0											1.0	Triticale.1093	1A	491135030.0	491138981.0	5.306499	7847-03-01	0.676042	12.961679	0.0	11.996328	6.164448999999999	Yes	TraesCS1A02G296200.1	A
Triticale.1094	Triticale.1094.1	968.0											1.0	Triticale.1094	1A	491310966.0	491311933.0	5.820849	0.0	0.0	0.0	0.0	0.0	0.0	Yes	TraesCS1A02G296500.1	A
Triticale.1095	Triticale.1095.1	776.0											1.0	Triticale.1095	1A	492048553.0	492050047.0	0.0	0.0	0.0	0.0	8.974882000000003	0.0	0.0	No		A
Triticale.1096	Triticale.1096.1	1525.0											1.0	Triticale.1096	1A	492123697.0	492126538.0	0.922625	0.672053	3.66618	11.382582	6.935345	0.0	2.622604	Yes		A
Triticale.1097	Triticale.1097.1	2313.0											1.0	Triticale.1097	1A	492807112.0	492809424.0	6.984315	2.084536	1.406973	2.260265	0.0	13.690584	0.0	Yes	TraesCS1A02G297800.1	A
Triticale.1098	Triticale.1098.1	1651.0									Triticale.1098.1	Triticale.1098.1	1.0	Triticale.1098	1A	492827574.0	492829224.0	0.0	6.640644	5.16327	1.156735	2.73517	0.0	0.0	No		A
Triticale.1099	Triticale.1099.1	1233.0											1.0	Triticale.1099	1A	493201602.0	493202834.0	16.758273000000006	0.0	0.0	0.0	0.0	0.0	0.0	Yes	TraesCS1A02G297900.1	A
Triticale.1100	Triticale.1100.1	910.0											1.0	Triticale.1100	1A	493208511.0	493211075.0	1.499741	3.542975	1.112221	0.0	9.934656	3.928049	7.792762	Yes		A
Triticale.1101	Triticale.1101.1	911.0									Triticale.1101.1	Triticale.1101.1	1.0	Triticale.1101	1A	493215080.0	493216775.0	1.461003	2.877622	0.372414	0.0	0.0	14.413432	0.0	Yes		A
Triticale.1102	Triticale.1102.1	1512.0											1.0	Triticale.1102	1A	493217368.0	493219890.0	0.0	9.38661	8.118948	84.52	57.96993000000001	0.0	9.345281	Yes		A
Triticale.1105	Triticale.1105.1	2337.0											1.0	Triticale.1105	1A	493509711.0	493513504.0	5.16908	2.6871080000000003	4.474568	19.824114	0.0	12.637192	9.593158	Yes		A
Triticale.1104	Triticale.1104.1	1072.0											1.0	Triticale.1104	1A	493736706.0	493737961.0	13.098759	0.0	0.196608	0.0	0.0	0.0	0.0	Yes	TraesCS1A02G298800.1	A
Triticale.1103	Triticale.1103.1	326.0											1.0	Triticale.1103	1A	493917104.0	493917429.0	6.291109	0.0	0.0	0.0	0.0	0.0	0.0	No		A
Triticale.1106	Triticale.1106.1	1811.0											1.0	Triticale.1106	1A	493919697.0	493923356.0	19.052432	1.121797	0.0	0.0	0.0	0.0	7.082719	Yes	TraesCS1A02G299100.1	A
Triticale.1107	Triticale.1107.1	2424.0											1.0	Triticale.1107	1A	494378160.0	494381747.0	0.0	5.8882900000000005	4.016374	8.121274	32.123092	6.445615	1.493223	No		A
Triticale.1110	Triticale.1110.1	2903.0											1.0	Triticale.1110	1A	494442747.0	494448514.0	17.319183	2.2495540000000003	4.991912	3.486074	0.0	6.360186	6.510467	Yes	TraesCS1A02G299500.2	A
Triticale.1108	Triticale.1108.1	2124.0											1.0	Triticale.1108	1A	494449940.0	494452499.0	0.0	9193-01-01	1.515393	9.775717	0.0	0.0	0.0	Yes		A
Triticale.1111	Triticale.1111.1	1446.0											1.0	Triticale.1111	1A	495191440.0	495193276.0	78.084604	6.1109550000000015	4.3758370000000015	0.0	0.0	0.0	0.0	Yes	TraesCS1A02G300200.1	A
Triticale.1109	Triticale.1109.1	278.0									Triticale.1109.1	Triticale.1109.1	1.0	Triticale.1109	1A	495284823.0	495285100.0	0.0	0.0	0.0	0.0	0.0	0.0	8.958408	No		A
Triticale.1112	Triticale.1112.1	1898.0											1.0	Triticale.1112	1A	495444290.0	495447580.0	7.314175	3.058219	2.765344	1.793193	0.281751	4.541211	3.591701	Yes	TraesCS1A02G300800.1	A
Triticale.1114	Triticale.1114.1	1121.0											1.0	Triticale.1114	1A	495706257.0	495709871.0	16.662525	49.688715	42.61189	33.473286	41.928128	51.71349	44.201781	Yes		A
Triticale.1113	Triticale.1113.1	629.0											1.0	Triticale.1113	1A	496476714.0	496479058.0	49.896491	7.166266	6.19833	7.495614999999999	4.1507	0.0	6.232635	Yes	TraesCS1A02G302900.1	A
Triticale.1117	Triticale.1117.1	2097.0											1.0	Triticale.1117	1A	497072884.0	497077040.0	11.452422	2.135208	2.114268	2.280039	0.0	3.237358	2.345042	Yes	TraesCS1A02G303300.1	A
Triticale.1116	Triticale.1116.1	506.0											1.0	Triticale.1116	1A	497182055.0	497183016.0	59.38397	0.0	0.0	0.0	0.0	0.0	0.0	Yes		A
Triticale.1115	Triticale.1115.1	562.0									Triticale.1115.1	Triticale.1115.1	1.0	Triticale.1115	1A	497186560.0	497187121.0	0.0	0.0	0.0	0.0	12.568574	0.0	0.0	No		A
Triticale.1118	Triticale.1118.1	1677.0											1.0	Triticale.1118	1A	497281273.0	497284845.0	2.518679	12.029932	11.622597	1.403165	0.0	39.321081	1.503934	Yes		A
Triticale.1121	Triticale.1121.1	812.0											1.0	Triticale.1121	1A	497511012.0	497514242.0	9.222132	3.778717	3.32201	13.910001	4.250794	0.0	6.627928999999999	Yes	TraesCS1A02G304300.1	A
Triticale.1122	Triticale.1122.1	1245.0											1.0	Triticale.1122	1A	497520178.0	497522796.0	10.505845	5.462579	6.7014960000000015	3.203493	2.018924	9.053249	11.154499	Yes		A
Triticale.1119	Triticale.1119.1	627.0											1.0	Triticale.1119	1A	497902190.0	497902938.0	6.652728999999999	0.0	0.0	0.0	0.0	0.0	0.0	Yes	TraesCS1A02G305300.1	A
Triticale.1120	Triticale.1120.1	1581.0											1.0	Triticale.1120	1A	498063594.0	498065982.0	4.202749	44.575119	30.634294	29.071690000000004	79.22854	55.54778	19.13636	No		A
Triticale.1124	Triticale.1124.1	1448.0											1.0	Triticale.1124	1A	498138711.0	498142127.0	19.799989	4.8573260000000005	5.1169410000000015	3.357311	1.464808	4.588804	7.437173	Yes	TraesCS1A02G305700.1	A
Triticale.1123	Triticale.1123.1	973.0											1.0	Triticale.1123	1A	498174286.0	498175809.0	17.809809	0.217817	0.185055	0.352247	0.0	0.0	0.0	Yes	TraesCS1A02G306000.2	A
Triticale.1127	Triticale.1127.1	1078.0											1.0	Triticale.1127	1A	498450826.0	498454792.0	127.506216	64.746873	84.37258	35.602539	18.474796	71.920084	22.422038	Yes		A
Triticale.1126	Triticale.1126.1	949.0											1.0	Triticale.1126	1A	498537150.0	498542005.0	9.485184	0.0	0.0	0.0	0.0	0.0	0.0	Yes	TraesCS1A02G306400.1	A
Triticale.1125	Triticale.1125.1	1094.0											1.0	Triticale.1125	1A	498596555.0	498597648.0	6.806338	2.246635	3.465004	0.0	0.0	0.0	0.0	Yes	TraesCS1A02G306600.1	A
Triticale.1128	Triticale.1128.1	1624.0											1.0	Triticale.1128	1A	498691235.0	498692858.0	0.0	0.0	1.067422	1.261014	0.0	27.903842	20.926705	Yes		A
Triticale.1129	Triticale.1129.1	1767.0											1.0	Triticale.1129	1A	498806607.0	498808373.0	3.3268949999999995	1.006966	1.918741	13.150025	12.549811	6.134068	0.0	Yes		A
Triticale.1130	Triticale.1130.1	679.0											1.0	Triticale.1130	1A	498809336.0	498811616.0	155.274449	13.390089	13.78335	57.643643	1.4770299999999998	35.66210200000001	28.837309	Yes	TraesCS1A02G307400.1	A
Triticale.1131	Triticale.1131.1	570.0											1.0	Triticale.1131	1A	499175578.0	499176571.0	1.7702189999999998	1.545536	10.505599	0.0	0.0	13.857116	0.0	Yes	TraesCS1A02G307500.2	A
Triticale.1132	Triticale.1132.1	1859.0											1.0	Triticale.1132	1A	499183870.0	499190342.0	9.400919	0.688284	2.139031	6.013431	7.422042	0.0	2.900715	Yes	TraesCS1A02G307700.1	A
Triticale.1133	Triticale.1133.1	1447.0											1.0	Triticale.1133	1A	499447119.0	499448660.0	0.818623	0.0	3.224858	0.0	0.0	14.861675	0.0	Yes		A
Triticale.1134	Triticale.1134.1	2594.0											1.0	Triticale.1134	1A	499620665.0	499626786.0	1.775577	1.935548	4.875905	0.0	0.0	9.540423	9.954689	Yes		A
Triticale.1136	Triticale.1136.1	1275.0											1.0	Triticale.1136	1A	499631867.0	499635857.0	7.683496000000001	15.693267	14.95028	6.599937	3.682997	12.062068	8.719427	Yes	TraesCS1A02G308400.1	A
Triticale.1135	Triticale.1135.1	940.0											1.0	Triticale.1135	1A	499784630.0	499787216.0	96.838417	16.918153	25.152601	9.784664	10.770708	0.0	17.911524	Yes		A
Triticale.1138	Triticale.1138.1	1299.0											1.0	Triticale.1138	1A	499795145.0	499798444.0	7.00105	0.536334	1.262112	2.1855860000000003	0.7457229999999999	3.905723000000001	4.17965	Yes	TraesCS1A02G308900.1	A
Triticale.1137	Triticale.1137.1	966.0											1.0	Triticale.1137	1A	499807699.0	499809171.0	34.616511	0.0	0.0	0.0	0.0	0.0	0.0	Yes	TraesCS1A02G309000.1	A
Triticale.1139	Triticale.1139.1	1005.0											1.0	Triticale.1139	1A	499926265.0	499927700.0	68.767318	0.764837	0.996901	0.0	0.0	0.0	0.0	Yes	TraesCS1A02G309100.1	A
Triticale.1142	Triticale.1142.1	911.0											1.0	Triticale.1142	1A	499939039.0	499973815.0	0.63056	18.153764	18.283227	0.4604470000000001	1.543607	19.745292000000006	4.853545	No		A
Triticale.1141	Triticale.1141.1	1020.0											2.0	Triticale.1141	1A	499979165.0	499981726.0	9.35369	5.369376	5.601793	0.0	1.676434	25.308285	6.907564999999999	Yes		A
Triticale.1141	Triticale.1141.2	608.0											2.0	Triticale.1141	1A	499979165.0	499981726.0	9.35369	5.369376	5.601793	0.0	1.676434	25.308285	6.907564999999999	Yes	TraesCS1A02G309200.2	A
Triticale.1140	Triticale.1140.1	256.0									Triticale.1140.1	Triticale.1140.1	1.0	Triticale.1140	1A	500561785.0	500562040.0	0.7443029999999999	0.0	0.2769	5.26199	14.270727	0.0	0.0	Yes		A
Triticale.1143	Triticale.1143.1	1740.0											1.0	Triticale.1143	1A	500562614.0	500566135.0	100.049617	55.326721	47.585447	18.919337	16.7192	9.575823	9.891641	Yes		A
Triticale.1145	Triticale.1145.2	1380.0											2.0	Triticale.1145	1A	500979161.0	500989668.0	5.691	31.953313	29.73567700000001	13.187748	34.691728000000005	16.355944	20.420629	Yes		A
Triticale.1145	Triticale.1145.2	1380.0											2.0	Triticale.1145	1A	500979161.0	500989668.0	5.691	31.953313	29.73567700000001	13.187748	34.691728000000005	16.355944	20.420629	No		A
Triticale.1145	Triticale.1145.3	1554.0											2.0	Triticale.1145	1A	500979161.0	500989668.0	5.691	31.953313	29.73567700000001	13.187748	34.691728000000005	16.355944	20.420629	Yes		A
Triticale.1145	Triticale.1145.3	1554.0											2.0	Triticale.1145	1A	500979161.0	500989668.0	5.691	31.953313	29.73567700000001	13.187748	34.691728000000005	16.355944	20.420629	No		A
Triticale.1144	Triticale.1144.1	1875.0											1.0	Triticale.1144	1A	501026421.0	501031402.0	14.998519	0.0	0.0	0.0	0.0	0.0	1.595568	Yes	TraesCS1A02G310500.1	A
Triticale.1146	Triticale.1146.1	723.0											1.0	Triticale.1146	1A	501707169.0	501707891.0	6.282184	1.533481	0.939552	0.0	0.0	0.0	9.144215	Yes		A
Triticale.1147	Triticale.1147.1	625.0											1.0	Triticale.1147	1A	501708093.0	501708822.0	25.135698	0.7730899999999999	0.215313	0.0	0.0	0.0	0.0	No		A
Triticale.1148	Triticale.1148.1	1566.0											1.0	Triticale.1148	1A	502677635.0	502679580.0	12.164399	3.793939	5.690671	0.0	0.0	15.361446	5.593068	Yes	TraesCS1A02G311000.1	A
Triticale.1149	Triticale.1149.1	1566.0											2.0	Triticale.1149	1A	502833672.0	502838598.0	3.719095	1.1462709999999998	0.443232	13.374485	20.09876	0.0	0.0	No		A
Triticale.1149	Triticale.1149.2	1802.0											2.0	Triticale.1149	1A	502833672.0	502838598.0	3.719095	1.1462709999999998	0.443232	13.374485	20.09876	0.0	0.0	No		A
Triticale.1152	Triticale.1152.1	1218.0											1.0	Triticale.1152	1A	503308018.0	503310135.0	1.685369	0.638227	0.469638	0.0	0.0	6.295528	9.603996	Yes		A
Triticale.1153	Triticale.1153.1	1042.0											1.0	Triticale.1153	1A	503310783.0	503312372.0	1.877255	0.0	0.5875239999999999	0.0	0.0	0.0	9.539962	Yes		A
Triticale.1150	Triticale.1150.1	649.0											1.0	Triticale.1150	1A	503371229.0	503372900.0	3.37125	2.27615	4.201326	3.410302	0.0	0.0	6.4714540000000005	Yes		A
Triticale.1151	Triticale.1151.1	355.0									Triticale.1151.1	Triticale.1151.1	1.0	Triticale.1151	1A	504106637.0	504107279.0	2.569989	5.845264	5.292051	0.0	0.0	41.494439	0.0	No		A
Triticale.1155	Triticale.1155.1	208.0									Triticale.1155.1	Triticale.1155.1	1.0	Triticale.1155	1A	505269674.0	505269881.0	2.8158830000000004	0.0	0.0	0.0	14.404360999999998	0.0	1.065416	Yes		A
Triticale.1156	Triticale.1156.1	1759.0											1.0	Triticale.1156	1A	505270970.0	505273773.0	54.82674300000001	6.7742070000000005	7.231019	1.395917	11.565867	19.051299	1.7247860000000002	Yes		A
Triticale.1160	Triticale.1160.1	1389.0											1.0	Triticale.1160	1A	505669133.0	505673537.0	0.933221	0.0	0.0	0.0	0.0	0.0	7.93162	Yes		A
Triticale.1161	Triticale.1161.1	2592.0											1.0	Triticale.1161	1A	505673783.0	505679950.0	3.154832	0.245601	0.892251	0.0	0.0	0.0	7.3119809999999985	Yes		A
Triticale.1157	Triticale.1157.1	1084.0											1.0	Triticale.1157	1A	505924967.0	505926050.0	10.066003	0.0	0.112952	0.0	0.0	0.0	0.0	Yes	TraesCS1A02G314300.1	A
Triticale.1158	Triticale.1158.1	1783.0											1.0	Triticale.1158	1A	506281831.0	506284439.0	1.422418	1.58072	0.0	6.46389	0.0	0.0	3.699069	Yes		A
Triticale.1159	Triticale.1159.1	1476.0											1.0	Triticale.1159	1A	506854214.0	506856595.0	2.647363	0.808485	8.419186999999999	12.465162	0.0	0.0	13.909401999999998	Yes		A
Triticale.1162	Triticale.1162.1	1855.0											1.0	Triticale.1162	1A	507078984.0	507081416.0	0.938628	4.375639	3.533845	6.760855	0.0	0.0	1.851698	Yes		A
Triticale.1163	Triticale.1163.1	1763.0											1.0	Triticale.1163	1A	507874244.0	507876789.0	0.946081	0.527502	1.447911	3.3193870000000003	27.612786	4806-07-01	7.054089	No		A
Triticale.1166	Triticale.1166.1	422.0									Triticale.1166.1	Triticale.1166.1	1.0	Triticale.1166	1A	508153379.0	508153908.0	0.6739430000000001	0.7645689999999999	0.6934670000000001	1.559688	0.0	0.0	9.61496	Yes		A
Triticale.1167	Triticale.1167.1	1090.0											2.0	Triticale.1167	1A	508202464.0	508205541.0	13.166957	0.0	0.0	0.0	0.0	0.0	0.0	No		A
Triticale.1167	Triticale.1167.2	1092.0											2.0	Triticale.1167	1A	508202464.0	508205541.0	13.166957	0.0	0.0	0.0	0.0	0.0	0.0	No		A
Triticale.1168	Triticale.1168.1	821.0											2.0	Triticale.1168	1A	508526174.0	508528148.0	86.565129	313.763586	324.539331	134.776746	90.816809	526.437303	615.518411	Yes		A
Triticale.1168	Triticale.1168.2	847.0											2.0	Triticale.1168	1A	508526174.0	508528148.0	86.565129	313.763586	324.539331	134.776746	90.816809	526.437303	615.518411	Yes	TraesCS1A02G316900.1	A
Triticale.1169	Triticale.1169.1	1618.0											1.0	Triticale.1169	1A	508640643.0	508644166.0	49.70955900000001	923.17337	952.845738	726.608233	443.657446	219.123366	610.504327	Yes	TraesCS1A02G317200.1	A
Triticale.1170	Triticale.1170.2	685.0											3.0	Triticale.1170	1A	508723754.0	508726379.0	0.0	974.447609	656.432101	1411.056025	3977.04422	118.368564	417.161402	Yes		A
Triticale.1170	Triticale.1170.1	1205.0											3.0	Triticale.1170	1A	508723754.0	508726379.0	0.0	974.447609	656.432101	1411.056025	3977.04422	118.368564	417.161402	Yes		A
Triticale.1170	Triticale.1170.3	1418.0											3.0	Triticale.1170	1A	508723754.0	508726379.0	0.0	974.447609	656.432101	1411.056025	3977.04422	118.368564	417.161402	Yes		A
Triticale.1171	Triticale.1171.1	839.0											1.0	Triticale.1171	1A	508725436.0	508726379.0	0.0	105.189709	69.77901899999999	134.491129	334.849445	0.0	18.456223	Yes		A
Triticale.1180	Triticale.1180.2	1094.0											7.0	Triticale.1180	1A	508914562.0	508930274.0	0.0	901.283398	680.531641	737.093859	2721.143535	64.964709	385.450008	Yes		A
Triticale.1180	Triticale.1180.2	1094.0											7.0	Triticale.1180	1A	508914562.0	508930274.0	0.0	901.283398	680.531641	737.093859	2721.143535	64.964709	385.450008	No		A
Triticale.1180	Triticale.1180.4	946.0											7.0	Triticale.1180	1A	508914562.0	508930274.0	0.0	901.283398	680.531641	737.093859	2721.143535	64.964709	385.450008	Yes		A
Triticale.1180	Triticale.1180.4	946.0											7.0	Triticale.1180	1A	508914562.0	508930274.0	0.0	901.283398	680.531641	737.093859	2721.143535	64.964709	385.450008	No		A
Triticale.1180	Triticale.1180.6	910.0											7.0	Triticale.1180	1A	508914562.0	508930274.0	0.0	901.283398	680.531641	737.093859	2721.143535	64.964709	385.450008	Yes		A
Triticale.1180	Triticale.1180.6	910.0											7.0	Triticale.1180	1A	508914562.0	508930274.0	0.0	901.283398	680.531641	737.093859	2721.143535	64.964709	385.450008	No		A
Triticale.1180	Triticale.1180.7	935.0											7.0	Triticale.1180	1A	508914562.0	508930274.0	0.0	901.283398	680.531641	737.093859	2721.143535	64.964709	385.450008	Yes		A
Triticale.1180	Triticale.1180.7	935.0											7.0	Triticale.1180	1A	508914562.0	508930274.0	0.0	901.283398	680.531641	737.093859	2721.143535	64.964709	385.450008	No		A
Triticale.1180	Triticale.1180.8	947.0											7.0	Triticale.1180	1A	508914562.0	508930274.0	0.0	901.283398	680.531641	737.093859	2721.143535	64.964709	385.450008	Yes		A
Triticale.1180	Triticale.1180.8	947.0											7.0	Triticale.1180	1A	508914562.0	508930274.0	0.0	901.283398	680.531641	737.093859	2721.143535	64.964709	385.450008	No		A
Triticale.1180	Triticale.1180.3	968.0											7.0	Triticale.1180	1A	508914562.0	508930274.0	0.0	901.283398	680.531641	737.093859	2721.143535	64.964709	385.450008	Yes		A
Triticale.1180	Triticale.1180.3	968.0											7.0	Triticale.1180	1A	508914562.0	508930274.0	0.0	901.283398	680.531641	737.093859	2721.143535	64.964709	385.450008	No		A
Triticale.1180	Triticale.1180.5	1031.0											7.0	Triticale.1180	1A	508914562.0	508930274.0	0.0	901.283398	680.531641	737.093859	2721.143535	64.964709	385.450008	Yes		A
Triticale.1180	Triticale.1180.5	1031.0											7.0	Triticale.1180	1A	508914562.0	508930274.0	0.0	901.283398	680.531641	737.093859	2721.143535	64.964709	385.450008	No		A
Triticale.1181	Triticale.1181.1	252.0									Triticale.1181.1	Triticale.1181.1	1.0	Triticale.1181	1A	508925351.0	508925664.0	0.0	10.547407000000002	6.201178	7.069522	10.962535	0.0	0.0	No		A
Triticale.1172	Triticale.1172.1	871.0											2.0	Triticale.1172	1A	509941034.0	509944531.0	6.281987	9.978347	5.088401999999999	5.811491999999999	12.84568	11.373351	16.180401	No		A
Triticale.1172	Triticale.1172.2	512.0									Triticale.1172.2	Triticale.1172.2	2.0	Triticale.1172	1A	509941034.0	509944531.0	6.281987	9.978347	5.088401999999999	5.811491999999999	12.84568	11.373351	16.180401	No		A
Triticale.1175	Triticale.1175.1	974.0											1.0	Triticale.1175	1A	510282882.0	510286410.0	3.485643	3.058478	3.714822	1.670137	0.0	0.0	7423-10-01	Yes		A
Triticale.1174	Triticale.1174.1	309.0											1.0	Triticale.1174	1A	510373312.0	510373620.0	33.465569	0.097251	0.0	0.0	0.0	0.0	0.0	Yes	TraesCS1A02G319500.1	A
Triticale.1173	Triticale.1173.1	882.0											1.0	Triticale.1173	1A	510378418.0	510380090.0	11.425291	0.0	0.0	0.0	0.0	0.0	0.0	Yes	TraesCS1A02G319600.1	A
Triticale.1176	Triticale.1176.1	377.0											1.0	Triticale.1176	1A	510457170.0	510457634.0	0.0	13.246487	9.822676	0.0	6.901292999999999	12.348909	0.0	Yes	TraesCS1A02G319900.1	A
Triticale.1177	Triticale.1177.1	1360.0											1.0	Triticale.1177	1A	510672233.0	510674036.0	0.0	0.0	10.278131	4.650298	0.0	3.79412	15.72042	Yes	TraesCS1A02G320000.1	A
Triticale.1178	Triticale.1178.1	1289.0											1.0	Triticale.1178	1A	511099314.0	511102961.0	26.65586	0.69203	0.0	0.0	0.0	2.348193	0.0	Yes	TraesCS1A02G320500.1	A
Triticale.1179	Triticale.1179.1	1300.0											1.0	Triticale.1179	1A	511481306.0	511484164.0	13.188441	1.343758	0.328917	1.736631	0.498612	4.002495	6.234208	Yes	TraesCS1A02G321000.1	A
Triticale.1183	Triticale.1183.1	856.0											1.0	Triticale.1183	1A	511635056.0	511636136.0	6.581359	0.0	0.0	0.0	0.0	0.0	0.0	Yes	TraesCS1A02G321400.1	A
Triticale.1182	Triticale.1182.1	2580.0											1.0	Triticale.1182	1A	512644365.0	512651864.0	8.310129	0.0	0.0	0.0	0.0	0.0	0.0	Yes		A
Triticale.1188	Triticale.1188.1	2789.0											2.0	Triticale.1188	1A	512875656.0	512884685.0	3.931871	9.908136	8.282079	14.266654	2.62426	3.78514	6.486416999999999	Yes		A
Triticale.1188	Triticale.1188.2	2795.0											2.0	Triticale.1188	1A	512875656.0	512884685.0	3.931871	9.908136	8.282079	14.266654	2.62426	3.78514	6.486416999999999	Yes		A
Triticale.1184	Triticale.1184.1	441.0									Triticale.1184.1	Triticale.1184.1	1.0	Triticale.1184	1A	513622965.0	513623405.0	5.9169730000000005	0.0	0.658432	3.901355	0.0	0.0	9.081062	Yes		A
Triticale.1187	Triticale.1187.1	1003.0											1.0	Triticale.1187	1A	513671672.0	513675083.0	11.433852	13.487028	14.742969	11.521245	1.069915	45.94192	20.931802	No		A
Triticale.1189	Triticale.1189.1	1304.0											1.0	Triticale.1189	1A	513717946.0	513726667.0	24.027861	21.692522	2.347103	0.0	1.63209	5.239239	27.093892	Yes	TraesCS1A02G323200.1	A
Triticale.1191	Triticale.1191.1	2412.0											1.0	Triticale.1191	1A	513735371.0	513739658.0	6.816336	6.677242	1.135486	11.619345	7.323111999999999	0.0	14.538401	Yes	TraesCS1A02G323400.1	A
Triticale.1190	Triticale.1190.1	392.0									Triticale.1190.1	Triticale.1190.1	1.0	Triticale.1190	1A	513847691.0	513848430.0	0.0	8.014957	4.6881080000000015	0.0	0.0	0.0	0.0	No		A
Triticale.1192	Triticale.1192.1	859.0											1.0	Triticale.1192	1A	514691374.0	514692353.0	1.246769	2.065848	2.382104	0.0	0.0	14.010735	11.670621	Yes		A
Triticale.1194	Triticale.1194.1	1069.0											2.0	Triticale.1194	1A	515608105.0	515611456.0	7.297642	18.008218	7.383385	6.034546	8.251517	39.931649	12.259272	No		A
Triticale.1194	Triticale.1194.2	1081.0											2.0	Triticale.1194	1A	515608105.0	515611456.0	7.297642	18.008218	7.383385	6.034546	8.251517	39.931649	12.259272	No		A
Triticale.1193	Triticale.1193.1	845.0											1.0	Triticale.1193	1A	516430393.0	516432298.0	64.691994	1.69859	1.375424	7.373516	1.455352	16.085044	12.750658	Yes	TraesCS1A02G325600.1	A
Triticale.1195	Triticale.1195.1	432.0											1.0	Triticale.1195	1A	516584010.0	516585807.0	7.4916399999999985	10.022339	2.474494	1.634102	1.7255220000000002	13.012129	0.0	No		A
Triticale.1196	Triticale.1196.1	1067.0											1.0	Triticale.1196	1A	516739269.0	516740335.0	0.0	0.0	0.0	3.0699110000000003	0.0	0.0	22.786708	Yes	TraesCS1A02G326800.1	A
Triticale.1197	Triticale.1197.1	592.0									Triticale.1197.1	Triticale.1197.1	1.0	Triticale.1197	1A	516764039.0	516765908.0	10.992408	33.579769	24.281062	18.315971	28.215639000000003	40.123881	19.16242	No		A
Triticale.1198	Triticale.1198.1	1327.0											1.0	Triticale.1198	1A	516769442.0	516773271.0	23.189833	3.31339	2.481818	6.242368	1.284941	0.0	2.914518	Yes	TraesCS1A02G326900.2	A
Triticale.1200	Triticale.1200.1	547.0											1.0	Triticale.1200	1A	516774216.0	516774762.0	0.5679810000000001	0.0	0.0	0.0	0.0	26.66616	0.0	Yes		A
Triticale.1201	Triticale.1201.1	1532.0											1.0	Triticale.1201	1A	516776308.0	516780176.0	3.256401	1.031864	4136-01-01	6.511184	0.0	3.791525	4.098468	Yes		A
Triticale.1199	Triticale.1199.1	1512.0											1.0	Triticale.1199	1A	516780762.0	516783619.0	8.04538	2.909551	0.370798	0.0	0.0	0.0	1.081789	Yes	TraesCS1A02G327100.1	A
Triticale.1202	Triticale.1202.1	2067.0											1.0	Triticale.1202	1A	516785930.0	516789948.0	13.403259	2.774891	6.8311720000000005	2.456671	9.250987	50.227365	20.395756	Yes		A
Triticale.1203	Triticale.1203.1	1212.0											1.0	Triticale.1203	1A	517097518.0	517106239.0	6.909600999999999	8.587267	0.469148	5.0029010000000005	4.4270830000000005	0.0	0.0	Yes		A
Triticale.1204	Triticale.1204.2	1562.0									Triticale.1204.2	Triticale.1204.2	2.0	Triticale.1204	1A	517324825.0	517330843.0	2.60221	9.021284	6.37431	7.560867999999998	15.208584	8.875171	6.588019	No		A
Triticale.1204	Triticale.1204.1	1447.0									Triticale.1204.1	Triticale.1204.1	2.0	Triticale.1204	1A	517324825.0	517330843.0	2.60221	9.021284	6.37431	7.560867999999998	15.208584	8.875171	6.588019	No		A
Triticale.1206	Triticale.1206.1	2957.0											1.0	Triticale.1206	1A	517377388.0	517382602.0	0.936089	0.012569	1.515645	10.538259	0.0	0.0	2.269706	Yes	TraesCS1A02G328000.1	A
Triticale.1205	Triticale.1205.1	694.0											1.0	Triticale.1205	1A	517503865.0	517504558.0	0.802026	0.0	0.990829	2.948388	0.0	0.0	9.617556	No		A
Triticale.1207	Triticale.1207.1	692.0											1.0	Triticale.1207	1A	517510579.0	517516380.0	1.829781	0.0	0.0	0.0	0.0	14.413432	0.0	Yes		A
Triticale.1208	Triticale.1208.1	2178.0											1.0	Triticale.1208	1A	517894641.0	517896818.0	1.292013	2.884364	0.3648	6.567728	0.0	0.0	1.950165	No		A
Triticale.1210	Triticale.1210.1	2035.0											1.0	Triticale.1210	1A	518015845.0	518021603.0	3.30849	3.167101	1.4963540000000002	6.518956	4.747776	0.0	5.921958999999998	Yes		A
Triticale.1209	Triticale.1209.1	967.0											1.0	Triticale.1209	1A	518047076.0	518049837.0	0.424178	0.576543	0.765591	3.82116	16.165804	0.0	0.0	Yes		A
Triticale.1211	Triticale.1211.1	1577.0											1.0	Triticale.1211	1A	518808449.0	518812199.0	0.0	6.901103999999999	2.624655	1.952759	0.0	0.0	0.0	Yes		A
Triticale.1212	Triticale.1212.1	851.0											1.0	Triticale.1212	1A	518953571.0	518955915.0	19.598677	32.004783	30.315916	9.285157	24.194165	10.534849	12.542954	Yes		A
Triticale.1214	Triticale.1214.2	881.0									Triticale.1214.2	Triticale.1214.2	6.0	Triticale.1214	1A	518956234.0	518963818.0	8.618308	35.55772	25.499394	33.480076000000004	15.329326000000002	13.883637	28.019728000000004	No		A
Triticale.1214	Triticale.1214.3	1113.0											6.0	Triticale.1214	1A	518956234.0	518963818.0	8.618308	35.55772	25.499394	33.480076000000004	15.329326000000002	13.883637	28.019728000000004	No		A
Triticale.1214	Triticale.1214.1	837.0									Triticale.1214.1	Triticale.1214.1	6.0	Triticale.1214	1A	518956234.0	518963818.0	8.618308	35.55772	25.499394	33.480076000000004	15.329326000000002	13.883637	28.019728000000004	No		A
Triticale.1214	Triticale.1214.4	935.0									Triticale.1214.4	Triticale.1214.4	6.0	Triticale.1214	1A	518956234.0	518963818.0	8.618308	35.55772	25.499394	33.480076000000004	15.329326000000002	13.883637	28.019728000000004	No		A
Triticale.1214	Triticale.1214.5	1150.0									Triticale.1214.5	Triticale.1214.5	6.0	Triticale.1214	1A	518956234.0	518963818.0	8.618308	35.55772	25.499394	33.480076000000004	15.329326000000002	13.883637	28.019728000000004	No		A
Triticale.1214	Triticale.1214.6	925.0									Triticale.1214.6	Triticale.1214.6	6.0	Triticale.1214	1A	518956234.0	518963818.0	8.618308	35.55772	25.499394	33.480076000000004	15.329326000000002	13.883637	28.019728000000004	No		A
Triticale.1213	Triticale.1213.1	3125.0											1.0	Triticale.1213	1A	518975306.0	518981896.0	7.36635	4.534279	8.76401	8.900615	36.971386	5.497859	4.790081	Yes	TraesCS1A02G330300.1	A
Triticale.1215	Triticale.1215.1	2352.0											1.0	Triticale.1215	1A	519251783.0	519260058.0	4.495196	4.757262	5.92283	10.332403	2.943493	0.0	3.82042	Yes	TraesCS1A02G330500.4	A
Triticale.1217	Triticale.1217.1	1966.0											1.0	Triticale.1217	1A	519266523.0	519271805.0	5.402599	5.310773999999999	3.701634	4.43027	0.486313	0.0	11.483981	Yes		A
Triticale.1219	Triticale.1219.1	1743.0											1.0	Triticale.1219	1A	519620475.0	519629516.0	7.196685	5.865014	15.51757	16.496822	1.634231	18.29174	0.0	Yes	TraesCS1A02G330700.1	A
Triticale.1216	Triticale.1216.1	1409.0											1.0	Triticale.1216	1A	519872272.0	519873680.0	14.798874	0.290729	0.0	0.0	0.0	0.0	0.0	Yes	TraesCS1A02G330900.1	A
Triticale.1218	Triticale.1218.1	1386.0											1.0	Triticale.1218	1A	520337993.0	520340864.0	1.214933	0.0	1.518474	5.079774	0.0	25.041521	1.103997	Yes		A
Triticale.1220	Triticale.1220.1	1276.0											1.0	Triticale.1220	1A	520412895.0	520416943.0	3.59415	0.0	1.3769559999999998	0.344771	10.303746	0.0	4.627142	Yes	TraesCS1A02G331700.1	A
Triticale.1221	Triticale.1221.1	2860.0											1.0	Triticale.1221	1A	520569996.0	520574179.0	6.205445	0.0	0.573909	0.0	0.0	0.0	0.0	Yes	TraesCS1A02G331800.1	A
Triticale.1222	Triticale.1222.1	318.0									Triticale.1222.1	Triticale.1222.1	1.0	Triticale.1222	1A	520580374.0	520582874.0	3.754511	2.372411	2.274429	0.0	0.0	14.413432	0.0	Yes		A
Triticale.1223	Triticale.1223.1	588.0											1.0	Triticale.1223	1A	520810425.0	520814545.0	3.711411	0.0	0.322984	0.0	0.0	14.413432	1.5434219999999998	Yes	TraesCS1A02G332400.1	A
Triticale.1224	Triticale.1224.1	1286.0											1.0	Triticale.1224	1A	520819952.0	520822444.0	52.974802	0.0	0.0	0.0	0.0	0.0	0.0	Yes	TraesCS1A02G332500.1	A
Triticale.1225	Triticale.1225.1	687.0									Triticale.1225.1	Triticale.1225.1	1.0	Triticale.1225	1A	520853469.0	520854407.0	8.804245	0.0	0.0	1.387452	0.0	0.0	0.0	No		A
Triticale.1226	Triticale.1226.1	1753.0											1.0	Triticale.1226	1A	521275806.0	521279686.0	5.951959	1.379508	2.227072	6.677617	1.566361	0.0	0.0	Yes	TraesCS1A02G333000.1	A
Triticale.1227	Triticale.1227.1	662.0									Triticale.1227.1	Triticale.1227.1	1.0	Triticale.1227	1A	521322211.0	521323613.0	1977-09-01	9.72378	5.400909	11.230298	0.0	33.442635	35.188947	Yes	TraesCS1A02G333400.1	A
Triticale.1228	Triticale.1228.1	1230.0											1.0	Triticale.1228	1A	521331628.0	521333865.0	4.836603	2.848822	6.556394999999998	7.15193	0.0	0.0	24.511431	Yes	TraesCS1A02G333600.1	A
Triticale.1229	Triticale.1229.1	1441.0											1.0	Triticale.1229	1A	521337020.0	521340794.0	12.092078	1.115686	0.908614	0.950199	10.432166	4.160985	3.057428	Yes	TraesCS1A02G333700.1	A
Triticale.1234	Triticale.1234.1	1830.0											3.0	Triticale.1234	1A	522884019.0	522914535.0	1.07879	4.500643	10.925565	10.148008	31.03292	0.0	0.0	No		A
Triticale.1234	Triticale.1234.2	1644.0											3.0	Triticale.1234	1A	522884019.0	522914535.0	1.07879	4.500643	10.925565	10.148008	31.03292	0.0	0.0	No		A
Triticale.1234	Triticale.1234.3	1511.0											3.0	Triticale.1234	1A	522884019.0	522914535.0	1.07879	4.500643	10.925565	10.148008	31.03292	0.0	0.0	No		A
Triticale.1230	Triticale.1230.1	1274.0											1.0	Triticale.1230	1A	522952042.0	522953406.0	4.774182	0.494097	2.419333	0.0	10.11782	10.465016	3.971756	Yes		A
Triticale.1233	Triticale.1233.1	528.0											1.0	Triticale.1233	1A	522962952.0	522964245.0	37.985977	0.0	0.0	0.0	0.0	0.0	0.0	No		A
Triticale.1231	Triticale.1231.1	520.0									Triticale.1231.1	Triticale.1231.1	1.0	Triticale.1231	1A	524401822.0	524402963.0	0.0	0.0	0.28649	0.0	2.077552	0.0	14.408492	No		A
Triticale.1232	Triticale.1232.1	354.0									Triticale.1232.1	Triticale.1232.1	1.0	Triticale.1232	1A	526555464.0	526555817.0	0.0	0.0	7.150958	0.0	0.0	0.0	0.0	No		A
Triticale.1236	Triticale.1236.1	626.0									Triticale.1236.1	Triticale.1236.1	1.0	Triticale.1236	1A	526829096.0	526833086.0	0.0	7.372412	0.0	0.0	0.0	0.0	0.0	Yes		A
Triticale.1237	Triticale.1237.1	1274.0											1.0	Triticale.1237	1A	527174405.0	527178618.0	29.670655	89.351511	103.679009	97.676776	35.220867	32.944983	93.454343	Yes	TraesCS1A02G337800.1	A
Triticale.1238	Triticale.1238.1	458.0									Triticale.1238.1	Triticale.1238.1	1.0	Triticale.1238	1A	527757696.0	527758324.0	4785-09-01	0.0	0.0	0.0	0.0	0.0	0.0	Yes	TraesCS1A02G338000.1	A
Triticale.1239	Triticale.1239.1	412.0									Triticale.1239.1	Triticale.1239.1	1.0	Triticale.1239	1A	527786582.0	527787152.0	12.57351	0.0	0.0	0.0	0.0	0.0	0.0	No		A
Triticale.1240	Triticale.1240.1	2580.0											1.0	Triticale.1240	1A	527951401.0	527955855.0	1.333361	9.293476	4.760726	0.0	6.916047	4.8044720000000005	2.306868	Yes	TraesCS1A02G338200.1	A
Triticale.1241	Triticale.1241.1	733.0											1.0	Triticale.1241	1A	527959099.0	527961943.0	2.182021	0.0	0.0	0.0	0.0	0.0	9.415366	Yes		A
Triticale.1242	Triticale.1242.1	814.0											1.0	Triticale.1242	1A	528295991.0	528296804.0	0.0	96.277921	67.259567	1.525	3.211784	71.73071999999998	4.718898	Yes		A
Triticale.1243	Triticale.1243.1	4551.0											1.0	Triticale.1243	1A	528665411.0	528674079.0	0.756718	1.704633	3.879173	7.4860289999999985	1.999947	0.0	13.754910999999998	Yes	TraesCS1A02G338900.2	A
Triticale.1244	Triticale.1244.1	1016.0											3.0	Triticale.1244	1A	528932333.0	528934467.0	206.402603	0.0	0.723071	0.0	0.0	0.0	0.0	Yes		A
Triticale.1244	Triticale.1244.2	1003.0											3.0	Triticale.1244	1A	528932333.0	528934467.0	206.402603	0.0	0.723071	0.0	0.0	0.0	0.0	Yes		A
Triticale.1244	Triticale.1244.3	999.0											3.0	Triticale.1244	1A	528932333.0	528934467.0	206.402603	0.0	0.723071	0.0	0.0	0.0	0.0	Yes		A
Triticale.1245	Triticale.1245.1	1436.0											1.0	Triticale.1245	1A	529664143.0	529665828.0	14.08203	0.0	0.0	0.0	0.0	0.0	0.0	Yes	TraesCS1A02G339400.1	A
Triticale.1246	Triticale.1246.1	2733.0											1.0	Triticale.1246	1A	529665836.0	529668658.0	5.907893	1.646712	1.380636	6.423172	0.0	0.0	2.523303	Yes		A
Triticale.1248	Triticale.1248.1	2846.0											1.0	Triticale.1248	1A	530210522.0	530217808.0	7.108307000000001	1.188706	3.145653	0.800451	0.325186	0.0	9.681342	Yes	TraesCS1A02G339900.1	A
Triticale.1247	Triticale.1247.1	337.0									Triticale.1247.1	Triticale.1247.1	1.0	Triticale.1247	1A	530257109.0	530257445.0	2.78803	0.0	0.0	4.052897	0.0	0.0	27.133275	Yes		A
Triticale.1249	Triticale.1249.1	1555.0											1.0	Triticale.1249	1A	530511919.0	530515502.0	1.512065	2.780273	0.793003	7.283353	0.358951	0.0	4.8929230000000015	Yes	TraesCS1A02G340200.1	A
Triticale.1254	Triticale.1254.1	3185.0											1.0	Triticale.1254	1A	530593635.0	530600419.0	12.133495	6.401413	1.172563	2.1639630000000003	4.105356	0.936758	5.104061	Yes	TraesCS1A02G340400.1	A
Triticale.1250	Triticale.1250.1	2259.0											1.0	Triticale.1250	1A	530605836.0	530617510.0	0.93655	0.809358	1.303509	1.905934	8191-07-01	7.229042	0.0	No		A
Triticale.1253	Triticale.1253.1	2839.0											1.0	Triticale.1253	1A	530693885.0	530707171.0	0.0	0.620888	0.808347	2.83431	16.776338	7.930184	0.0	No		A
Triticale.1251	Triticale.1251.1	611.0											1.0	Triticale.1251	1A	530726271.0	530727004.0	7.628846	0.0	0.0	0.0	0.0	0.0	0.0	Yes	TraesCS1A02G340500.1	A
Triticale.1252	Triticale.1252.1	1799.0											1.0	Triticale.1252	1A	531023766.0	531028367.0	44.036717	0.0	0.347043	0.0	0.0	0.0	0.0	Yes	TraesCS1A02G341300.1	A
Triticale.1255	Triticale.1255.1	2212.0											1.0	Triticale.1255	1A	531603476.0	531608254.0	13.810388	3.5961550000000004	1.347315	6.766642999999998	18.245579	8.614173	7.194155	Yes		A
Triticale.1258	Triticale.1258.1	2034.0											1.0	Triticale.1258	1A	532241970.0	532248308.0	17.631802	24.333738	24.870738	30.312117	5.943392	37.63507	15.624116	No		A
Triticale.1259	Triticale.1259.1	1977.0											1.0	Triticale.1259	1A	532249187.0	532254040.0	2.752738	11.317654	3.5978230000000004	27.612749	20.325123	6.16781	23.712881	Yes	TraesCS1A02G344000.1	A
Triticale.1257	Triticale.1257.1	996.0									Triticale.1257.1	Triticale.1257.1	1.0	Triticale.1257	1A	532777068.0	532780294.0	8.877382	1.876968	1.095349	0.0	0.0	0.0	6.335857	Yes	TraesCS1A02G345900.1	A
Triticale.1260	Triticale.1260.1	1395.0											1.0	Triticale.1260	1A	533139791.0	533141385.0	7.134243	0.0	0.0	0.0	0.0	0.0	0.0	Yes	TraesCS1A02G346600.1	A
Triticale.1262	Triticale.1262.1	1256.0											1.0	Triticale.1262	1A	533147563.0	533149783.0	35.138005	42.044188	40.854303	88.286367	75.075275	47.532197	77.721138	Yes	TraesCS1A02G346800.1	A
Triticale.1261	Triticale.1261.1	528.0											1.0	Triticale.1261	1A	533328223.0	533398891.0	6.037082	0.510727	0.589427	0.0	0.0	0.0	0.0	No		A
Triticale.1264	Triticale.1264.1	2584.0											1.0	Triticale.1264	1A	533447249.0	533451936.0	5.235828	7.5891449999999985	4.060201	0.638112	6.699087	15.780027	6.848639	Yes		A
Triticale.1263	Triticale.1263.1	883.0											1.0	Triticale.1263	1A	533468166.0	533469169.0	89.423686	0.0	0.0	0.0	0.0	0.0	0.0	Yes	TraesCS1A02G348000.1	A
Triticale.1265	Triticale.1265.1	942.0											1.0	Triticale.1265	1A	533694570.0	533697025.0	2.888622	3.847402	9.354453	23.169779	1.636164	0.0	25.21109	Yes	TraesCS1A02G348300.1	A
Triticale.1268	Triticale.1268.1	1702.0											1.0	Triticale.1268	1A	533732274.0	533734729.0	14.798001	4.8112650000000015	6.495663	15.910402	0.0	0.0	14.083701	Yes	TraesCS1A02G348500.1	A
Triticale.1266	Triticale.1266.1	730.0									Triticale.1266.1	Triticale.1266.1	1.0	Triticale.1266	1A	533758257.0	533758986.0	0.293161	0.0	0.379071	0.0	0.0	0.0	11.412818	No		A
Triticale.1267	Triticale.1267.1	1050.0											1.0	Triticale.1267	1A	533770063.0	533771112.0	3.460408	0.279417	0.580521	4.134585	0.0	10.803213	9.93964	No		A
Triticale.1269	Triticale.1269.1	1259.0											1.0	Triticale.1269	1A	534043225.0	534046916.0	7.599231	2.324046	0.727432	0.0	0.988226	10.269138	5.758302	Yes	TraesCS1A02G348700.1	A
Triticale.1270	Triticale.1270.1	891.0											1.0	Triticale.1270	1A	534258973.0	534262123.0	0.798519	5.242736	5.183621	21.102918	10.081841	0.0	19.630865	Yes	TraesCS1A02G349000.1	A
Triticale.1271	Triticale.1271.1	1229.0											1.0	Triticale.1271	1A	534262362.0	534265794.0	17.995838	14.723491	44.719942	13.470554000000002	10.980542	18.154596	30.55045	Yes	TraesCS1A02G349100.1	A
Triticale.1272	Triticale.1272.1	1158.0											1.0	Triticale.1272	1A	534267762.0	534272143.0	25.055198	0.0	0.0739809999999999	0.0	0.0	0.0	0.0	Yes	TraesCS1A02G349200.1	A
Triticale.1273	Triticale.1273.1	1764.0											1.0	Triticale.1273	1A	535062101.0	535064765.0	340.8575370000001	138.771259	177.367393	133.934577	74.01118199999998	156.611246	129.761111	Yes	TraesCS1A02G350200.1	A
Triticale.1274	Triticale.1274.1	1264.0											1.0	Triticale.1274	1A	535204987.0	535206250.0	5.96593	0.515524	1.0679379999999998	2.885537	0.0	0.0	1.135418	No		A
Triticale.1275	Triticale.1275.1	2129.0											1.0	Triticale.1275	1A	535314168.0	535318770.0	7.833067	6.821192999999999	8.157425	4.955269	16.724182	5.111392	13.962873000000002	Yes		A
Triticale.1278	Triticale.1278.1	1601.0											1.0	Triticale.1278	1A	535323497.0	535328371.0	3.775617	0.362061	0.7240479999999999	8.754741000000001	10.740291	0.0	10.196768	Yes		A
Triticale.1276	Triticale.1276.1	3883.0									Triticale.1276.1	Triticale.1276.1	1.0	Triticale.1276	1A	535335270.0	535339372.0	2.463444	0.0	0.386295	8.854664999999997	2.617119	0.0	0.0	No		A
Triticale.1277	Triticale.1277.1	713.0											1.0	Triticale.1277	1A	535446441.0	535447153.0	46.768145	0.0	0.0	0.0	0.0	0.0	0.0	Yes	TraesCS1A02G351000.1	A
Triticale.1279	Triticale.1279.1	949.0											2.0	Triticale.1279	1A	535716789.0	535729775.0	0.734879	16.800335	6.268356	51.94694000000001	19.945089000000007	0.0	0.0	No		A
Triticale.1279	Triticale.1279.2	907.0											2.0	Triticale.1279	1A	535716789.0	535729775.0	0.734879	16.800335	6.268356	51.94694000000001	19.945089000000007	0.0	0.0	No		A
Triticale.1280	Triticale.1280.1	818.0											1.0	Triticale.1280	1A	535769431.0	535770248.0	2.792934	44.256006	41.249275	53.910288	28.815327000000003	0.0	0.0	Yes		A
Triticale.1281	Triticale.1281.1	705.0											1.0	Triticale.1281	1A	535857796.0	535858500.0	15.095264000000002	0.0	0.0	0.0	0.0	0.0	0.0	Yes		A
Triticale.1282	Triticale.1282.1	1671.0											1.0	Triticale.1282	1A	536353567.0	536355600.0	5.513806	7.3325619999999985	1.722495	3.597042	7.483414999999999	13.430104	9.134939	Yes		A
Triticale.1283	Triticale.1283.1	944.0											1.0	Triticale.1283	1A	536638336.0	536639279.0	0.931668	15.513658	23.613259	9.058614	8.449593	0.0	4.158481	No		A
Triticale.1285	Triticale.1285.1	947.0											1.0	Triticale.1285	1A	536664937.0	536667287.0	20.996715	0.987043	0.979501	0.0	0.0	5.418355	1.916645	Yes	TraesCS1A02G352800.1	A
Triticale.1286	Triticale.1286.1	427.0									Triticale.1286.1	Triticale.1286.1	1.0	Triticale.1286	1A	536684243.0	536684858.0	0.0	3.050243	2.265551	10.19896	6.59497	0.0	5.226921	No		A
Triticale.1284	Triticale.1284.1	297.0											1.0	Triticale.1284	1A	536685140.0	536685436.0	20.248444	0.0	0.0	0.0	0.0	0.0	0.0	No		A
Triticale.1287	Triticale.1287.1	666.0											1.0	Triticale.1287	1A	536875510.0	536884197.0	1.3473389999999998	0.0	0.689272	20.610308	6.683105	0.0	3.168981	Yes		A
Triticale.1288	Triticale.1288.1	1681.0											2.0	Triticale.1288	1A	537352530.0	537356855.0	70.109569	9.944964	11.403255	40.883015	6.171768	22.370395	105.203502	Yes	TraesCS1A02G354400.1	A
Triticale.1288	Triticale.1288.2	1509.0											2.0	Triticale.1288	1A	537352530.0	537356855.0	70.109569	9.944964	11.403255	40.883015	6.171768	22.370395	105.203502	Yes		A
Triticale.1290	Triticale.1290.1	1654.0											1.0	Triticale.1290	1A	537542953.0	537546678.0	42.628679	0.0	0.773727	0.0	1.0102209999999998	0.0	4.3097650000000005	Yes	TraesCS1A02G354700.1	A
Triticale.1291	Triticale.1291.1	1210.0											1.0	Triticale.1291	1A	537827139.0	537831773.0	8.406536000000001	2.00838	3.557006	0.95122	0.660696	0.0	6.876697999999998	Yes	TraesCS1A02G355100.1	A
Triticale.1289	Triticale.1289.1	991.0											1.0	Triticale.1289	1A	537889407.0	537890397.0	0.0	0.0	0.0	0.0	0.0	0.0	5527-10-01	No		A
Triticale.1292	Triticale.1292.1	1295.0											1.0	Triticale.1292	1A	537963048.0	537965568.0	4.8352010000000005	0.721188	0.273985	6.220181	0.0	0.0	10.483437	Yes		A
Triticale.1293	Triticale.1293.1	240.0									Triticale.1293.1	Triticale.1293.1	1.0	Triticale.1293	1A	539292802.0	539293041.0	0.0	0.0	0.0	0.0	0.0	0.0	10.200941	No		A
Triticale.1294	Triticale.1294.1	951.0											1.0	Triticale.1294	1A	539702670.0	539703620.0	6.240738	0.036588	0.240357	0.0	0.0	0.0	1.581243	Yes	TraesCS1A02G356500.1	A
Triticale.1295	Triticale.1295.1	2219.0											1.0	Triticale.1295	1A	539899749.0	539901967.0	6.625383	1.5669959999999998	0.776934	0.0	2.033424	2.773562	2.801056	Yes		A
Triticale.1296	Triticale.1296.1	2475.0											2.0	Triticale.1296	1A	540047420.0	540052224.0	15.197425	7.706102	10.713665	21.746644	4.653772	8.187997	16.558146	Yes		A
Triticale.1296	Triticale.1296.2	2190.0											2.0	Triticale.1296	1A	540047420.0	540052224.0	15.197425	7.706102	10.713665	21.746644	4.653772	8.187997	16.558146	Yes		A
Triticale.1297	Triticale.1297.1	1103.0											1.0	Triticale.1297	1A	540053820.0	540056894.0	12.380015	2.771039	1.851711	1.998875	0.0	0.0	20.579199	No		A
Triticale.1298	Triticale.1298.1	1321.0											1.0	Triticale.1298	1A	540062518.0	540064393.0	0.90239	8.523439	17.768435	0.0	0.0	0.0	0.0	Yes	TraesCS1A02G357600.1	A
Triticale.1301	Triticale.1301.1	2315.0											1.0	Triticale.1301	1A	540143408.0	540150615.0	18.366288	6.532756	8.404578	6.680657000000001	12.598371	2.185365	24.663231	Yes	TraesCS1A02G357900.1	A
Triticale.1300	Triticale.1300.1	1121.0											1.0	Triticale.1300	1A	540647195.0	540656673.0	6.237981	11.910731	6.339386	6.703479	1.668837	12.664794	0.0	Yes		A
Triticale.1299	Triticale.1299.1	671.0									Triticale.1299.1	Triticale.1299.1	1.0	Triticale.1299	1A	540667046.0	540667716.0	2.134644	0.0	0.880734	16.662704	0.0	11.019515	3.38127	No		A
Triticale.1302	Triticale.1302.1	795.0											1.0	Triticale.1302	1A	540887567.0	540888605.0	12.354465	2.217235	0.8878379999999999	1.675123	0.0	0.0	0.0	Yes	TraesCS1A02G359400.1	A
Triticale.1303	Triticale.1303.1	766.0											1.0	Triticale.1303	1A	541343769.0	541344534.0	36.15432	0.0	0.139059	0.0	0.0	0.0	6.275136	Yes	TraesCS1A02G359900.1	A
Triticale.1304	Triticale.1304.1	772.0											1.0	Triticale.1304	1A	541381317.0	541382088.0	96.407522	0.0	0.28234	0.0	0.0	0.0	6.410902	Yes	TraesCS1A02G360000.1	A
Triticale.1306	Triticale.1306.1	1637.0											1.0	Triticale.1306	1A	541632663.0	541636078.0	21.304612	3.788805	3.698783	1.7353580000000002	0.6401439999999999	4.807413	4.057988	Yes	TraesCS1A02G360500.2	A
Triticale.1305	Triticale.1305.1	632.0											1.0	Triticale.1305	1A	541718576.0	541719290.0	7.041192	0.0	0.0	0.0	0.0	0.0	0.0	Yes	TraesCS1A02G360600.1	A
Triticale.1309	Triticale.1309.1	769.0											1.0	Triticale.1309	1A	541977820.0	541981503.0	20.439869	1.505509	0.258301	4.414766999999999	0.5900350000000001	0.0	3.801167	No		A
Triticale.1310	Triticale.1310.1	371.0									Triticale.1310.1	Triticale.1310.1	1.0	Triticale.1310	1A	541979079.0	541979533.0	7.0485630000000015	28.49238	18.524434	22.576015	20.077778	27.894458	5.191015	No		A
Triticale.1307	Triticale.1307.1	1028.0											1.0	Triticale.1307	1A	541991530.0	541992557.0	1.118501	0.0	1.065309	0.3334	0.0	0.0	8.658759	Yes		A
Triticale.1308	Triticale.1308.1	600.0											1.0	Triticale.1308	1A	541997515.0	541998469.0	14.500234	0.0	0.0	1.327175	0.0	0.0	0.0	Yes	TraesCS1A02G361300.1	A
Triticale.1314	Triticale.1314.1	1174.0											1.0	Triticale.1314	1A	541999855.0	542002059.0	4.708329	1.270406	0.0	0.0	0.0	14.413432	12.700992	Yes		A
Triticale.1311	Triticale.1311.1	462.0											1.0	Triticale.1311	1A	542167994.0	542168455.0	100.97968	0.0	0.775374	0.0	0.0	0.0	0.274096	Yes	TraesCS1A02G361600.1	A
Triticale.1312	Triticale.1312.1	618.0											1.0	Triticale.1312	1A	542170382.0	542170999.0	142.107923	0.0	0.232473	0.0	0.0	5.900643	2.715014	Yes		A
Triticale.1313	Triticale.1313.1	731.0											1.0	Triticale.1313	1A	542358394.0	542359124.0	6.450979	0.253143	0.0	0.0	0.0	0.0	0.0	Yes	TraesCS1A02G361900.1	A
Triticale.1315	Triticale.1315.1	1875.0											1.0	Triticale.1315	1A	542436892.0	542439349.0	1.643975	1.975533	3.966199	4.669841	16.847341	4.381683	5.6984580000000005	Yes		A
Triticale.1317	Triticale.1317.1	711.0									Triticale.1317.1	Triticale.1317.1	1.0	Triticale.1317	1A	543177855.0	543183303.0	1.450846	2.081004	5.732456	14.869109	7.113544999999999	24.954897	0.0	No		A
Triticale.1316	Triticale.1316.1	338.0									Triticale.1316.1	Triticale.1316.1	1.0	Triticale.1316	1A	543391691.0	543392028.0	0.0	7.500938	5.632239	5.0448260000000005	3.569129	0.0	0.0	No		A
Triticale.1318	Triticale.1318.1	864.0											1.0	Triticale.1318	1A	543928312.0	543929175.0	31.365809	0.0	0.349237	0.0	0.0	9.892558	3.981692	Yes		A
Triticale.1321	Triticale.1321.1	1062.0											1.0	Triticale.1321	1A	543929623.0	543933861.0	9.745112	5.665193	1.35709	2.39556	6.349379	0.0	5.335967	Yes	TraesCS1A02G363100.1	A
Triticale.1319	Triticale.1319.1	777.0											1.0	Triticale.1319	1A	544043535.0	544049319.0	189.815406	27.532591	47.963026	73.573864	3.517667	95.699998	57.204596	Yes		A
Triticale.1320	Triticale.1320.1	529.0											1.0	Triticale.1320	1A	544049968.0	544052722.0	35.137324	3.826952	4.081646	3.0815200000000003	1.923078	25.203067	21.873414	Yes		A
Triticale.1322	Triticale.1322.1	350.0											1.0	Triticale.1322	1A	544177388.0	544177737.0	0.0	1.344366	2.5798520000000003	11.867851	4.413908999999999	0.0	32.984726	Yes		A
Triticale.1323	Triticale.1323.1	1524.0											1.0	Triticale.1323	1A	544199764.0	544204085.0	6.88019	5.735403	4.65258	1.1166280000000002	1.821811	10.545256	17.075429	Yes	TraesCS1A02G364200.1	A
Triticale.1324	Triticale.1324.1	1234.0											1.0	Triticale.1324	1A	544364546.0	544368971.0	8.171536999999999	12.608	2.992944	1.428789	1.534986	0.0	0.0	Yes	TraesCS1A02G364500.1	A
Triticale.1325	Triticale.1325.1	1625.0											1.0	Triticale.1325	1A	544371409.0	544376958.0	7.986712	2.547118	0.789402	0.0	0.8609379999999999	10.218013	2.824879	Yes		A
Triticale.1326	Triticale.1326.1	1854.0											1.0	Triticale.1326	1A	544585475.0	544588670.0	14.143712	4.258994	3.802982	3575-01-01	7.129343	12.570934	4.169282	Yes	TraesCS1A02G365600.1	A
Triticale.1328	Triticale.1328.1	1827.0											2.0	Triticale.1328	1A	544602874.0	544606822.0	8.203103	3.486981	4.90552	3.664161	12.036156	0.0	8.666841999999999	Yes	TraesCS1A02G365800.1	A
Triticale.1328	Triticale.1328.2	1535.0											2.0	Triticale.1328	1A	544602874.0	544606822.0	8.203103	3.486981	4.90552	3.664161	12.036156	0.0	8.666841999999999	Yes		A
Triticale.1329	Triticale.1329.1	1555.0											1.0	Triticale.1329	1A	545330380.0	545334892.0	4.1529	3.823829	6.719925	3.309418	16.144694	18.48256	1.157067	Yes		A
Triticale.1327	Triticale.1327.1	1803.0											1.0	Triticale.1327	1A	545416993.0	545418795.0	6.398078	0.0	0.069591	0.0	0.0	0.0	0.0	Yes	TraesCS1A02G366500.1	A
Triticale.1335	Triticale.1335.1	852.0											1.0	Triticale.1335	1A	545474625.0	545530051.0	0.0	548.586679	405.492089	4.65114	14.452969	224.473978	4.378378	Yes		A
Triticale.1331	Triticale.1331.1	708.0											1.0	Triticale.1331	1A	546030618.0	546034397.0	13.56105	0.0	0.485083	0.0	0.953679	0.0	0.0	Yes		A
Triticale.1334	Triticale.1334.1	727.0											1.0	Triticale.1334	1A	546212417.0	546213143.0	72.759787	0.0	2.676443	1.184459	0.0	0.0	5.907771	Yes		A
Triticale.1333	Triticale.1333.1	676.0											1.0	Triticale.1333	1A	546216476.0	546217151.0	37.45763	0.425818	2.350691	0.0	0.0	0.0	3.504557	Yes		A
Triticale.1336	Triticale.1336.1	712.0											1.0	Triticale.1336	1A	546217979.0	546219570.0	8.23804	1.309491	1.762789	1.034587	2.698288	0.0	11.768038	Yes	TraesCS1A02G368100.1	A
Triticale.1338	Triticale.1338.1	747.0											1.0	Triticale.1338	1A	546514359.0	546516755.0	8.231525999999999	0.0	0.323251	1.20753	0.0	0.0	0.0	Yes	TraesCS1A02G368800.1	A
Triticale.1337	Triticale.1337.1	835.0											1.0	Triticale.1337	1A	546519391.0	546520320.0	2.439307	8.606975	6.303481	8.180641	0.0	0.0	0.0	Yes	TraesCS1A02G368900.1	A
Triticale.1339	Triticale.1339.1	1574.0											1.0	Triticale.1339	1A	546521262.0	546523169.0	0.925508	3.85454	6.5150190000000014	4.0462120000000015	17.921944	4.258102	2.2526740000000003	No		A
Triticale.1340	Triticale.1340.1	528.0	Triticale.1340.1	LTR	Copia	tork	no	+	RNaseH|tork	Triticale.1340	Triticale.1340.1	Triticale.1340.1	1.0	Triticale.1340	1A	547060650.0	547061177.0	0.0	9.444713	0.0	0.0	0.0	0.0	0.0	No		A
Triticale.1341	Triticale.1341.1	1479.0											1.0	Triticale.1341	1A	547256188.0	547258215.0	3.5304839999999995	11.030081	3.722025	3.289246	0.0	0.0	0.0	Yes		A
Triticale.1344	Triticale.1344.1	2309.0											1.0	Triticale.1344	1A	547311399.0	547318676.0	10.369214	5.135943	7.26031	10.400017	4.239742	7.646800999999999	4.718782	Yes	TraesCS1A02G369700.1	A
Triticale.1342	Triticale.1342.1	961.0											1.0	Triticale.1342	1A	547381596.0	547384543.0	8.132169000000001	1.728906	1.898907	3.174314	0.0	18.582978	10.700944	Yes	TraesCS1A02G369900.1	A
Triticale.1343	Triticale.1343.1	1090.0											1.0	Triticale.1343	1A	547391574.0	547393153.0	0.0	0.0	0.0	0.0	0.0	0.0	13.258644	Yes		A
Triticale.1346	Triticale.1346.1	2525.0											2.0	Triticale.1346	1A	547963983.0	547968293.0	4.394149	4.135797	4.926869	10.557446	1.138087	0.0	10.440282	Yes		A
Triticale.1346	Triticale.1346.2	2159.0											2.0	Triticale.1346	1A	547963983.0	547968293.0	4.394149	4.135797	4.926869	10.557446	1.138087	0.0	10.440282	Yes		A
Triticale.1345	Triticale.1345.1	487.0											1.0	Triticale.1345	1A	548471101.0	548472072.0	2.758062	5.477168	7.596996000000001	4.971898	7.0912630000000005	0.0	0.0	Yes		A
Triticale.1347	Triticale.1347.1	1992.0											1.0	Triticale.1347	1A	548674156.0	548676147.0	14.168470999999998	0.432719	0.032731	1.408119	0.0	1.823386	0.0	Yes	TraesCS1A02G371900.1	A
Triticale.1349	Triticale.1349.1	791.0											1.0	Triticale.1349	1A	548941125.0	548942554.0	1.56873	1.452639	4.6926260000000015	3.492217	1.6525869999999998	0.0	9.778923	Yes		A
Triticale.1348	Triticale.1348.1	593.0											1.0	Triticale.1348	1A	548995200.0	548995925.0	6.644786999999999	0.0	0.0	0.0	0.0	0.0	0.0	No		A
Triticale.1350	Triticale.1350.1	405.0									Triticale.1350.1	Triticale.1350.1	1.0	Triticale.1350	1A	549415505.0	549415909.0	0.697597	16.148017000000007	12.063832	0.0	2.854197	0.0	0.0	No		A
Triticale.1352	Triticale.1352.1	1367.0											1.0	Triticale.1352	1A	549423942.0	549427559.0	6.744797999999999	4.358965	5.32031	3.248144	0.0	0.0	0.0	Yes	TraesCS1A02G373300.1	A
Triticale.1351	Triticale.1351.1	1513.0											1.0	Triticale.1351	1A	549582178.0	549588699.0	2.769355	0.0	0.0	7.497930999999999	0.0	0.0	0.0	No		A
Triticale.1353	Triticale.1353.1	1330.0											1.0	Triticale.1353	1A	549941307.0	549942928.0	1.472163	0.5505899999999999	1.354396	0.801293	9.062291	13.665663	4.689208	Yes		A
Triticale.1355	Triticale.1355.1	1591.0											2.0	Triticale.1355	1A	550311406.0	550314141.0	5.011679	2.455961	9.179248	9.13558	0.247843	0.0	23.592064	Yes		A
Triticale.1355	Triticale.1355.2	1169.0											2.0	Triticale.1355	1A	550311406.0	550314141.0	5.011679	2.455961	9.179248	9.13558	0.247843	0.0	23.592064	Yes		A
Triticale.1354	Triticale.1354.1	670.0											1.0	Triticale.1354	1A	550338567.0	550339236.0	1.938897	0.0	0.0	0.0	0.0	0.0	10.056564	Yes		A
Triticale.1356	Triticale.1356.1	1102.0											1.0	Triticale.1356	1A	550342744.0	550345277.0	4.744244	9.303784	8.019321000000001	7.982644	6.662997	11.208994	5.103982	Yes	TraesCS1A02G375800.1	A
Triticale.1357	Triticale.1357.1	2261.0											1.0	Triticale.1357	1A	550441580.0	550446624.0	7.5264570000000015	4.848001	6.134385	11.114024	4.811541	4.6026120000000015	11.910874	Yes	TraesCS1A02G376100.1	A
Triticale.1358	Triticale.1358.1	1313.0											1.0	Triticale.1358	1A	550969803.0	550972156.0	66.615403	0.0	1.98399	2.724604	1.253388	0.0	10.162899	Yes		A
Triticale.1359	Triticale.1359.1	2154.0											1.0	Triticale.1359	1A	551050612.0	551055304.0	3.926636	3.824788	7.216260000000001	7.635182	5.0363440000000015	11.763609	8.326048	Yes		A
Triticale.1361	Triticale.1361.1	2125.0											1.0	Triticale.1361	1A	551320074.0	551323790.0	151.020117	20.926341	18.359902	22.54651	16.981048	42.874021	57.334679	Yes	TraesCS1A02G379000.1	A
Triticale.1362	Triticale.1362.1	1949.0											1.0	Triticale.1362	1A	551484006.0	551487641.0	8.517961999999999	1.467186	5.557705	9.677978	0.0	5.20629	29.132273	Yes	TraesCS1A02G379300.1	A
Triticale.1360	Triticale.1360.1	354.0									Triticale.1360.1	Triticale.1360.1	1.0	Triticale.1360	1A	551508994.0	551509347.0	0.668175	6.044957	9.159822	2.393955	0.0	0.0	0.0	No		A
Triticale.1364	Triticale.1364.1	2081.0											1.0	Triticale.1364	1A	551530360.0	551533816.0	1.372083	16.871745	24.370777	35.64675	8.090773	10.597086	7.43912	Yes	TraesCS1A02G379500.1	A
Triticale.1363	Triticale.1363.1	632.0									Triticale.1363.1	Triticale.1363.1	1.0	Triticale.1363	1A	551534848.0	551536530.0	0.0	0.0	0.0	0.0	0.0	24.49371	22.942102	No		A
Triticale.1366	Triticale.1366.1	1272.0											1.0	Triticale.1366	1A	551601664.0	551605185.0	30.065604	8.350066	4.691307	2.321793	2.362508	0.0	3.405567	Yes	TraesCS1A02G379800.1	A
Triticale.1369	Triticale.1369.1	1183.0											1.0	Triticale.1369	1A	551606459.0	551611132.0	0.6752090000000001	3.046232	3.952533	11.885608	30.880187	0.0	9.718651	Yes		A
Triticale.1367	Triticale.1367.1	498.0											1.0	Triticale.1367	1A	551631782.0	551632793.0	0.0	0.0	1.7621490000000002	0.0	21.432994	0.0	0.0	Yes		A
Triticale.1368	Triticale.1368.1	419.0									Triticale.1368.1	Triticale.1368.1	1.0	Triticale.1368	1A	551632795.0	551633306.0	0.8490219999999999	0.788916	0.0	0.0	21.400275	0.0	0.0	Yes		A
Triticale.1370	Triticale.1370.1	1940.0											1.0	Triticale.1370	1A	551654662.0	551657026.0	0.0	0.0	0.653605	0.0	0.0	14.413432	0.0	Yes		A
Triticale.1371	Triticale.1371.1	865.0											1.0	Triticale.1371	1A	551744265.0	551746680.0	5.419082	3.15133	2.090809	2.655304	0.0	0.0	8.198165	Yes	TraesCS1A02G380700.1	A
Triticale.1372	Triticale.1372.1	495.0											3.0	Triticale.1372	1A	551827754.0	551828535.0	107.597953	0.0	0.0	0.0	0.0	0.0	0.0	No		A
Triticale.1372	Triticale.1372.2	392.0									Triticale.1372.2	Triticale.1372.2	3.0	Triticale.1372	1A	551827754.0	551828535.0	107.597953	0.0	0.0	0.0	0.0	0.0	0.0	No		A
Triticale.1372	Triticale.1372.3	425.0											3.0	Triticale.1372	1A	551827754.0	551828535.0	107.597953	0.0	0.0	0.0	0.0	0.0	0.0	No		A
Triticale.1373	Triticale.1373.1	1206.0											1.0	Triticale.1373	1A	551909849.0	551911242.0	50.953629	1.084568	0.894558	0.0	0.0	0.0	0.0	No		A
Triticale.1375	Triticale.1375.1	414.0									Triticale.1375.1	Triticale.1375.1	1.0	Triticale.1375	1A	551980055.0	551980468.0	0.800327	0.0	0.0	0.0	0.0	0.0	5.021455	No		A
Triticale.1376	Triticale.1376.1	784.0											2.0	Triticale.1376	1A	551982009.0	551984293.0	37.673242	18.368792000000006	42.7393	67.836269	20.963969	118.764861	107.220397	Yes		A
Triticale.1376	Triticale.1376.2	807.0											2.0	Triticale.1376	1A	551982009.0	551984293.0	37.673242	18.368792000000006	42.7393	67.836269	20.963969	118.764861	107.220397	Yes	TraesCS1A02G381200.1	A
Triticale.1374	Triticale.1374.1	983.0											1.0	Triticale.1374	1A	552212304.0	552213722.0	3.426039	2.372411	0.198598	4.721689	0.0	22.844482	4.294078	Yes		A
Triticale.1377	Triticale.1377.1	829.0											1.0	Triticale.1377	1A	552329257.0	552330085.0	0.0	0.0	0.0	0.0	0.0	0.0	7.930438	No		A
Triticale.1379	Triticale.1379.1	636.0											1.0	Triticale.1379	1A	552907144.0	552907779.0	2.135525	2.35003	2.274429	0.0	0.0	0.0	9.77286	Yes		A
Triticale.1381	Triticale.1381.1	1371.0											1.0	Triticale.1381	1A	553539939.0	553542082.0	5.821408	0.0	1.054267	4.799546	1.787412	0.0	9.675232	Yes		A
Triticale.1380	Triticale.1380.1	1288.0											1.0	Triticale.1380	1A	553705264.0	553707108.0	5.151521	0.0	0.6427729999999999	9.485566	0.0	0.0	3.690986	Yes		A
Triticale.1382	Triticale.1382.1	614.0											1.0	Triticale.1382	1A	554061310.0	554063347.0	11.410288	1.530089	0.740239	3.940732	0.0	13.638767	9.083226	Yes	TraesCS1A02G383500.1	A
Triticale.1383	Triticale.1383.1	489.0									Triticale.1383.1	Triticale.1383.1	1.0	Triticale.1383	1A	554112371.0	554113568.0	0.0	6.492999999999999	11.784548	16.106527	0.975755	0.0	3.366506	No		A
Triticale.1386	Triticale.1386.1	1202.0											1.0	Triticale.1386	1A	554204301.0	554208507.0	6.069063	1.349367	3.335324	3.189001	6.862144	0.0	8.406164	Yes		A
Triticale.1384	Triticale.1384.1	1180.0											1.0	Triticale.1384	1A	554452701.0	554453880.0	0.446246	0.757966	1.7575419999999995	0.0	0.0	23.03706	7.2616869999999984	No		A
Triticale.1385	Triticale.1385.1	1220.0									Triticale.1385.1	Triticale.1385.1	1.0	Triticale.1385	1A	554458455.0	554459674.0	2.10191	6.634973	2.612175	0.0	0.479653	60.241053	0.0	Yes		A
Triticale.1387	Triticale.1387.1	618.0									Triticale.1387.1	Triticale.1387.1	1.0	Triticale.1387	1A	554463455.0	554464072.0	0.0	1.346157	2.0904130000000003	0.0	0.0	0.0	8.981746000000003	No		A
Triticale.1389	Triticale.1389.1	896.0											1.0	Triticale.1389	1A	554466816.0	554467711.0	0.0	2.7854650000000003	3235-05-01	0.0	0.0	29.229027	17.790015	No		A
Triticale.1390	Triticale.1390.1	2044.0									Triticale.1390.1	Triticale.1390.1	1.0	Triticale.1390	1A	554471962.0	554474005.0	4.092031	3289.894829	2362.025179	180.479884	99.991928	2882.608708	317.205689	No		A
Triticale.1396	Triticale.1396.1	2305.0											1.0	Triticale.1396	1A	554527073.0	554534929.0	7.83805	7.692925	4.884019	0.61992	2.742608	5.365169	10.525231	Yes	TraesCS1A02G385400.2	A
Triticale.1392	Triticale.1392.1	819.0											1.0	Triticale.1392	1A	554808035.0	554812568.0	1.866941	2.591596	0.379071	14.247067	1.791751	0.0	0.0	No		A
Triticale.1393	Triticale.1393.1	463.0									Triticale.1393.1	Triticale.1393.1	1.0	Triticale.1393	1A	555092662.0	555103883.0	9.270722	0.649039	1.220724	1.550472	0.0	0.0	4.3304800000000006	No		A
Triticale.1391	Triticale.1391.1	471.0									Triticale.1391.1	Triticale.1391.1	1.0	Triticale.1391	1A	555421285.0	555421755.0	13.027196	0.656485	1.102607	5.050287	0.0	0.0	0.0	No		A
Triticale.1394	Triticale.1394.1	835.0											1.0	Triticale.1394	1A	555483558.0	555484392.0	1.672668	4.8764650000000005	3.134263	1.031258	0.0	2.968994	8.928723	Yes		A
Triticale.1395	Triticale.1395.1	1281.0											1.0	Triticale.1395	1A	555512819.0	555514099.0	35.294892	7.087600999999999	2.79051	4.312794	0.0	7.606155	13.613067	Yes		A
Triticale.1397	Triticale.1397.1	603.0											1.0	Triticale.1397	1A	555544966.0	555552586.0	0.0	0.727854	1.01903	0.0	0.0	14.413432	4.900093	Yes		A
Triticale.1398	Triticale.1398.1	715.0											1.0	Triticale.1398	1A	555635269.0	555637755.0	55.770236	59.874349	160.53913400000005	91.398475	4.230651	80.795861	68.120255	Yes	TraesCS1A02G386300.1	A
Triticale.1402	Triticale.1402.1	1427.0											1.0	Triticale.1402	1A	555638590.0	555642520.0	7.825405	0.0	0.261923	0.8471989999999999	0.0	8.110712	2.366406	Yes	TraesCS1A02G386400.1	A
Triticale.1399	Triticale.1399.1	842.0											1.0	Triticale.1399	1A	555732838.0	555734072.0	13.654692	0.0	0.0	0.0	0.0	0.0	0.0	Yes	TraesCS1A02G386700.1	A
Triticale.1400	Triticale.1400.1	1710.0											1.0	Triticale.1400	1A	556087172.0	556091095.0	5.63506	0.0	0.0	0.0	0.0	0.0	0.0	Yes	TraesCS1A02G387400.1	A
Triticale.1401	Triticale.1401.1	347.0											1.0	Triticale.1401	1A	556186968.0	556187314.0	13.787278	0.0	0.0	0.0	0.0	0.0	0.0	Yes	TraesCS1A02G387500.1	A
Triticale.1406	Triticale.1406.1	2085.0											1.0	Triticale.1406	1A	556299356.0	556305934.0	5.062287	4.864296	13.603847	7.206614	14.052025	6.594923	10.843722	Yes	TraesCS1A02G387700.1	A
Triticale.1404	Triticale.1404.1	2125.0											1.0	Triticale.1404	1A	556796077.0	556800728.0	8.794388	0.716003	0.5685180000000001	0.0	1.197256	0.0	0.0	Yes	TraesCS1A02G388000.1	A
Triticale.1403	Triticale.1403.1	544.0											1.0	Triticale.1403	1A	556812381.0	556812924.0	0.0	0.0	0.0	0.0	13.993943	0.0	0.0	No		A
Triticale.1408	Triticale.1408.1	1272.0											1.0	Triticale.1408	1A	556957369.0	556962862.0	6.311386	0.315824	0.683938	1.864673	0.0	0.0	2.812395	Yes	TraesCS1A02G388500.1	A
Triticale.1405	Triticale.1405.1	460.0									Triticale.1405.1	Triticale.1405.1	1.0	Triticale.1405	1A	557051667.0	557052126.0	0.0	0.770174	0.43346	0.0	9.171037	0.0	0.0	No		A
Triticale.1407	Triticale.1407.1	784.0											1.0	Triticale.1407	1A	557098184.0	557099707.0	29.055555	0.0	0.0	0.0	0.0	0.0	0.0	Yes		A
Triticale.1409	Triticale.1409.1	1065.0											1.0	Triticale.1409	1A	557138601.0	557139665.0	0.0	0.714322	4.772029	4.744003	1.800545	8.120239	0.0	Yes	TraesCS1A02G388900.1	A
Triticale.1411	Triticale.1411.1	758.0											3.0	Triticale.1411	1A	557152361.0	557154185.0	1.79771	1.343324	5.569383	24.56454500000001	2.412106	0.0	8.889051	Yes	TraesCS1A02G389000.1	A
Triticale.1411	Triticale.1411.2	528.0											3.0	Triticale.1411	1A	557152361.0	557154185.0	1.79771	1.343324	5.569383	24.56454500000001	2.412106	0.0	8.889051	Yes		A
Triticale.1411	Triticale.1411.3	531.0											3.0	Triticale.1411	1A	557152361.0	557154185.0	1.79771	1.343324	5.569383	24.56454500000001	2.412106	0.0	8.889051	Yes		A
Triticale.1412	Triticale.1412.1	1815.0											1.0	Triticale.1412	1A	557154348.0	557156162.0	6.55281	0.352049	2.821837	0.0	0.0	9.863082	7.439214999999999	Yes		A
Triticale.1410	Triticale.1410.1	635.0											1.0	Triticale.1410	1A	557291357.0	557295167.0	1.272691	0.0	11.788226	0.0	31.958969	0.0	0.0	No		A
Triticale.1415	Triticale.1415.1	2024.0											1.0	Triticale.1415	1A	557487273.0	557491337.0	6.426168	8.45738	6.430729	8.176131	1.273014	5.490494	7.578236	Yes		A
Triticale.1416	Triticale.1416.1	1154.0											1.0	Triticale.1416	1A	557491423.0	557495243.0	9.306567	6.127701	6.027696	16.679156	16.325048000000002	0.0	11.979235	Yes	TraesCS1A02G389600.1	A
Triticale.1413	Triticale.1413.1	687.0											1.0	Triticale.1413	1A	557932691.0	557935729.0	0.938628	0.0	0.0	3.410302	0.0	8.47602	7.903005999999999	Yes		A
Triticale.1414	Triticale.1414.1	1901.0											1.0	Triticale.1414	1A	557968941.0	557970884.0	0.0	0.0	0.466411	0.0	14.390153	0.0	0.0	No		A
Triticale.1417	Triticale.1417.1	1093.0											1.0	Triticale.1417	1A	558480382.0	558481862.0	3.753652	0.745945	0.182773	7.014050999999999	5.591080000000002	0.0	4.822573	No		A
Triticale.1423	Triticale.1423.1	4027.0											1.0	Triticale.1423	1A	558507058.0	558517659.0	8.993065	5.871428	9.404398	6.965839999999999	19.68125	6.771847999999999	15.607617	Yes		A
Triticale.1418	Triticale.1418.1	789.0											1.0	Triticale.1418	1A	558590999.0	558591872.0	130.424032	0.0	0.584702	0.0	0.0	0.0	0.0	Yes	TraesCS1A02G392000.1	A
Triticale.1420	Triticale.1420.1	926.0											1.0	Triticale.1420	1A	558975599.0	558979576.0	42.69945	6.7807580000000005	4.135808	3.421351	0.637775	9.915072	6.8831880000000005	Yes		A
Triticale.1419	Triticale.1419.1	739.0											1.0	Triticale.1419	1A	560180209.0	560180947.0	0.938628	0.053505	1.005899	1.615163	0.0	0.0	8.846275	Yes		A
Triticale.1422	Triticale.1422.1	995.0											1.0	Triticale.1422	1A	560191240.0	560193771.0	1.42445	0.8376950000000001	1.062543	2.649411	11.684542	0.0	0.0	No		A
Triticale.1421	Triticale.1421.1	1592.0											1.0	Triticale.1421	1A	560402941.0	560405361.0	1.498149	0.0	1.160311	2.559868	7.968995	0.0	0.0	Yes		A
Triticale.1425	Triticale.1425.1	1290.0											1.0	Triticale.1425	1A	560456487.0	560463748.0	10.651605	1.929193	1.1818799999999998	0.68867	0.0	0.0	5.411324	Yes	TraesCS1A02G394500.1	A
Triticale.1424	Triticale.1424.1	568.0											1.0	Triticale.1424	1A	560877128.0	560878419.0	8.282397999999999	1.236327	5.716771	2.593751	0.0	0.0	19.879207	No		A
Triticale.1429	Triticale.1429.1	1431.0											1.0	Triticale.1429	1A	560946979.0	560952119.0	11.629538	4.699508	4.088726	4.859264	1.42433	0.0	9.557163	Yes	TraesCS1A02G395200.1	A
Triticale.1426	Triticale.1426.1	349.0									Triticale.1426.1	Triticale.1426.1	1.0	Triticale.1426	1A	560968428.0	560968776.0	5.806582	0.0	0.0	0.0	0.0	0.0	0.0	No		A
Triticale.1428	Triticale.1428.1	850.0											1.0	Triticale.1428	1A	561335386.0	561336235.0	2.349882	0.0	0.944557	0.0	9.612792	5.392324	0.0	Yes		A
Triticale.1427	Triticale.1427.1	1481.0											1.0	Triticale.1427	1A	561405720.0	561407200.0	10.271033	0.0	0.0	0.0	0.0	0.0	0.0	No		A
Triticale.1430	Triticale.1430.1	958.0											1.0	Triticale.1430	1A	561496766.0	561497723.0	13.958903	0.0	0.0	0.0	0.0	0.0	0.0	Yes	TraesCS1A02G395800.1	A
Triticale.1431	Triticale.1431.1	849.0											1.0	Triticale.1431	1A	561518343.0	561519191.0	0.0	0.0	0.0	0.0	0.0	0.0	5.270134	No		A
Triticale.1432	Triticale.1432.1	1730.0											1.0	Triticale.1432	1A	561974825.0	561976732.0	2.186514	0.8840549999999999	1.222012	6.516042	0.0	0.0	19.037561	Yes		A
Triticale.1434	Triticale.1434.1	891.0											1.0	Triticale.1434	1A	562320552.0	562321517.0	0.0	0.0	0.351843	0.0	0.0	0.0	6.478482	Yes		A
Triticale.1433	Triticale.1433.1	1185.0											1.0	Triticale.1433	1A	562486540.0	562487801.0	5.9573160000000005	0.0	0.155467	0.0	0.0	0.0	0.0	No		A
Triticale.1438	Triticale.1438.1	1059.0											1.0	Triticale.1438	1A	562739251.0	562742144.0	7.130556	0.768401	0.693711	1.68583	0.0	0.0	6.312688	Yes	TraesCS1A02G396600.1	A
Triticale.1435	Triticale.1435.1	1225.0											1.0	Triticale.1435	1A	562784506.0	562785730.0	29.006277	0.0	0.079837	0.0	0.0	0.0	0.0	Yes	TraesCS1A02G396700.1	A
Triticale.1436	Triticale.1436.1	1167.0											1.0	Triticale.1436	1A	562805948.0	562807114.0	83.36815899999998	1.552469	0.940695	0.904446	0.0	8.781441000000001	0.524469	Yes	TraesCS1A02G396800.1	A
Triticale.1437	Triticale.1437.1	1004.0											1.0	Triticale.1437	1A	562902353.0	562903356.0	25.866486	2.525216	0.371898	0.0	0.715555	7.020091000000002	0.0	Yes	TraesCS1A02G396900.1	A
Triticale.1439	Triticale.1439.1	777.0											1.0	Triticale.1439	1A	562927781.0	562928683.0	101.447891	0.354182	1.082086	0.0	0.0	0.0	0.0	No		A
Triticale.1440	Triticale.1440.1	616.0											1.0	Triticale.1440	1A	562947096.0	562947835.0	11.175155	0.0	0.0	0.0	0.0	0.0	0.0	No		A
Triticale.1441	Triticale.1441.1	1454.0											1.0	Triticale.1441	1A	563159273.0	563162375.0	12.938731	2.288653	1.421127	2.409961	0.0	0.0	6.212596	Yes		A
Triticale.1442	Triticale.1442.1	911.0											1.0	Triticale.1442	1A	563179567.0	563180477.0	92.458435	1.337682	0.813901	2.360258	0.0	7.024775	3.990567	Yes		A
Triticale.1443	Triticale.1443.1	771.0											1.0	Triticale.1443	1A	563183425.0	563184195.0	128.951124	2.1303490000000003	1.4125450000000002	1.848905	1.65809	39.146203	22.905241	Yes	TraesCS1A02G397500.1	A
Triticale.1444	Triticale.1444.1	765.0									Triticale.1444.1	Triticale.1444.1	2.0	Triticale.1444	1A	563598146.0	563606882.0	0.0	154.549757	98.418711	60.241094	299.300685	94.992745	94.064526	Yes		A
Triticale.1444	Triticale.1444.1	765.0									Triticale.1444.1	Triticale.1444.1	2.0	Triticale.1444	1A	563598146.0	563606882.0	0.0	154.549757	98.418711	60.241094	299.300685	94.992745	94.064526	No		A
Triticale.1444	Triticale.1444.2	981.0											2.0	Triticale.1444	1A	563598146.0	563606882.0	0.0	154.549757	98.418711	60.241094	299.300685	94.992745	94.064526	Yes		A
Triticale.1444	Triticale.1444.2	981.0											2.0	Triticale.1444	1A	563598146.0	563606882.0	0.0	154.549757	98.418711	60.241094	299.300685	94.992745	94.064526	No		A
Triticale.1445	Triticale.1445.1	674.0											1.0	Triticale.1445	1A	563608918.0	563610026.0	0.0	4505.747436	4389.857062	1064.08757	3516.157411	5769.050813	4932.064071	Yes	TraesCS1A02G398200.1	A
Triticale.1446	Triticale.1446.1	2401.0											2.0	Triticale.1446	1A	563679143.0	563684070.0	1.835817	56.329784	72.877558	68.58856999999999	151.606501	40.749741	26.236707	Yes		A
Triticale.1446	Triticale.1446.2	2304.0											2.0	Triticale.1446	1A	563679143.0	563684070.0	1.835817	56.329784	72.877558	68.58856999999999	151.606501	40.749741	26.236707	Yes	TraesCS1A02G398300.8	A
Triticale.1447	Triticale.1447.1	363.0									Triticale.1447.1	Triticale.1447.1	1.0	Triticale.1447	1A	564087024.0	564087765.0	5.0267	2.999825	0.989972	0.0	0.0	0.0	9.433475	Yes		A
Triticale.1448	Triticale.1448.1	972.0											1.0	Triticale.1448	1A	564100030.0	564102644.0	113.292938	73.773362	142.751987	410.304577	33.460132	434.212053	652.530311	Yes	TraesCS1A02G399800.1	A
Triticale.1450	Triticale.1450.1	2402.0											1.0	Triticale.1450	1A	564300588.0	564310244.0	8.192867	12.433265	9.786419	6.997364999999999	17.076693	0.0	0.0	Yes		A
Triticale.1449	Triticale.1449.1	496.0											1.0	Triticale.1449	1A	564319733.0	564320347.0	1.144899	3.101035	6.46867	4.799175	3.194516	0.0	4.595532	Yes		A
Triticale.1452	Triticale.1452.1	1310.0											1.0	Triticale.1452	1A	564392272.0	564395502.0	15.47231	0.0	1.460438	0.0	0.0	0.0	0.0	Yes		A
Triticale.1453	Triticale.1453.1	1147.0											1.0	Triticale.1453	1A	564405174.0	564406893.0	0.0	3.68651	2.283682	8.204646	17.499981	0.0	0.0	No		A
Triticale.1454	Triticale.1454.1	434.0									Triticale.1454.1	Triticale.1454.1	1.0	Triticale.1454	1A	564574268.0	564574701.0	0.0	2.372411	0.379071	1.705151	0.0	22.682893	0.0	Yes		A
Triticale.1455	Triticale.1455.1	667.0											1.0	Triticale.1455	1A	565401146.0	565401812.0	0.0	0.0	0.0	0.0	0.0	0.0	7.997585000000001	No		A
Triticale.1456	Triticale.1456.1	1452.0											1.0	Triticale.1456	1A	565646092.0	565657876.0	0.0	0.0	0.6612859999999999	0.0	16.194987	0.0	4.94567	No		A
Triticale.1459	Triticale.1459.1	1353.0											1.0	Triticale.1459	1A	565996676.0	566000431.0	1.184211	2.303442	0.488338	0.669205	7.823655	0.0	6.582763000000001	Yes		A
Triticale.1458	Triticale.1458.1	1191.0											1.0	Triticale.1458	1A	566010738.0	566013009.0	2.795393	3.075569	3.975317	3.385963	8.992144	0.0	0.0	Yes		A
Triticale.1457	Triticale.1457.1	2784.0											1.0	Triticale.1457	1A	566020796.0	566023674.0	0.0	0.0	0.351295	16.228946	5.134528	0.0	0.0	No		A
Triticale.1460	Triticale.1460.1	1582.0											1.0	Triticale.1460	1A	566107909.0	566111974.0	6.276109	1.885532	0.563336	0.48072	1.514871	0.0	0.0	Yes		A
Triticale.1461	Triticale.1461.1	1620.0											1.0	Triticale.1461	1A	566477494.0	566479113.0	6.616167	3.368727	6.787953	11.483455	20.788516	0.0	17.190479	Yes		A
Triticale.1465	Triticale.1465.1	1116.0											1.0	Triticale.1465	1A	566480047.0	566483482.0	17.076968	4.6810480000000005	2.013223	2.294925	5.924375	9.131096	21.233055	Yes	TraesCS1A02G402900.2	A
Triticale.1463	Triticale.1463.1	938.0											1.0	Triticale.1463	1A	566485816.0	566488303.0	18.921653	0.0	0.909691	1.117982	0.731351	0.0	7.869522999999999	Yes		A
Triticale.1462	Triticale.1462.1	657.0											1.0	Triticale.1462	1A	566492106.0	566492762.0	8.771954	0.476649	9.46467	5.265984	0.0	0.0	2.304889	Yes	TraesCS1A02G403100.1	A
Triticale.1464	Triticale.1464.1	2528.0											1.0	Triticale.1464	1A	566497332.0	566501467.0	8.071900999999999	0.0	0.075874	0.0	0.0	0.0	0.0	Yes	TraesCS1A02G403200.1	A
Triticale.1466	Triticale.1466.1	980.0											1.0	Triticale.1466	1A	566564178.0	566565157.0	315.965055	8.81504	6.280595	0.0	0.0	0.0	0.0	Yes	TraesCS1A02G403300.1	A
Triticale.1467	Triticale.1467.1	467.0											1.0	Triticale.1467	1A	566584499.0	566584965.0	0.0	13.889019	4.453075	5.783638	0.0	0.0	8.801447	No		A
Triticale.1468	Triticale.1468.1	2314.0											1.0	Triticale.1468	1A	566585356.0	566587933.0	7.676139999999998	4.959439	3.484213	5.985714	0.0	0.0	0.0	No		A
Triticale.1469	Triticale.1469.1	554.0									Triticale.1469.1	Triticale.1469.1	1.0	Triticale.1469	1A	566592522.0	566593197.0	35.379826	19.04067	13.840896	27.531725	19.815747	0.0	77.926162	No		A
Triticale.1471	Triticale.1471.1	982.0											1.0	Triticale.1471	1A	566598210.0	566603276.0	14.823053	6.191139	7.772122	58.59676700000001	12.147263	20.475289	20.449886	Yes	TraesCS1A02G403400.1	A
Triticale.1470	Triticale.1470.1	1003.0											1.0	Triticale.1470	1A	566688721.0	566689723.0	2.248776	4.962432	5.127858	0.0	0.0	13.852994	0.0	Yes	TraesCS1A02G403800.1	A
Triticale.1472	Triticale.1472.1	3172.0											1.0	Triticale.1472	1A	567318284.0	567327266.0	11.742611	0.448504	0.144841	0.644001	0.0	0.0	1.227601	Yes	TraesCS1A02G403900.1	A
Triticale.1473	Triticale.1473.1	4038.0											1.0	Triticale.1473	1A	567969742.0	567979347.0	8.204275	2.703969	2.49269	22.383169	6.691178999999999	9.558988	4.8111760000000015	Yes		A
Triticale.1477	Triticale.1477.1	1936.0											1.0	Triticale.1477	1A	568008195.0	568013677.0	271.704584	115.662802	71.79056800000002	80.82996700000002	59.623524	133.651817	87.583048	Yes		A
Triticale.1474	Triticale.1474.1	2507.0											1.0	Triticale.1474	1A	568024495.0	568028513.0	18.998318	0.0	0.0	0.0	0.0	0.0	0.0	Yes		A
Triticale.1480	Triticale.1480.1	1736.0											1.0	Triticale.1480	1A	568413098.0	568417263.0	7.599856	3.338139	4.768962999999999	0.0	0.0	0.0	0.0	Yes	TraesCS1A02G405600.1	A
Triticale.1475	Triticale.1475.1	601.0											1.0	Triticale.1475	1A	568777583.0	568778183.0	1.271286	0.0	3.359292	6.678744	0.0	0.0	0.0	No		A
Triticale.1478	Triticale.1478.1	405.0											1.0	Triticale.1478	1A	568788982.0	568790204.0	17.296242000000003	0.388568	0.418383	0.0	0.0	0.0	0.0	Yes		A
Triticale.1479	Triticale.1479.1	1489.0											1.0	Triticale.1479	1A	568841391.0	568842879.0	5.743973	0.0	0.311353	0.0	0.0	2.855589	1.201267	No		A
Triticale.1481	Triticale.1481.1	926.0											1.0	Triticale.1481	1A	569133145.0	569134070.0	17.708235000000005	0.0	0.0	0.0	0.0	0.0	0.0	Yes	TraesCS1A02G406500.1	A
Triticale.1482	Triticale.1482.1	1309.0											1.0	Triticale.1482	1A	569465796.0	569468944.0	76.332877	2.606208	2.665084	4.864044	5.381003	20.315343	25.837588	Yes	TraesCS1A02G407100.1	A
Triticale.1485	Triticale.1485.1	1905.0											2.0	Triticale.1485	1A	570141575.0	570146134.0	14.414318	6.557200999999999	3.061705	0.0	2.853463	14.413432	0.814304	Yes		A
Triticale.1485	Triticale.1485.2	822.0											2.0	Triticale.1485	1A	570141575.0	570146134.0	14.414318	6.557200999999999	3.061705	0.0	2.853463	14.413432	0.814304	Yes		A
Triticale.1483	Triticale.1483.1	589.0									Triticale.1483.1	Triticale.1483.1	1.0	Triticale.1483	1A	570355935.0	570356523.0	50.620556	5.566506	2.972074	4.9330680000000005	1.085217	25.96375	23.989927	No		A
Triticale.1490	Triticale.1490.1	2146.0	Triticale.1490.1	LTR	Copia	retrofit	no	+	INT|retrofit	Triticale.1490			1.0	Triticale.1490	1A	570364699.0	570367164.0	0.0	7.053483	6.1455150000000005	11.729467	10.048149	0.0	1.489967	No		A
Triticale.1484	Triticale.1484.1	1709.0											1.0	Triticale.1484	1A	570425616.0	570427442.0	8.220269	1.272042	1.576174	2.987257	0.0	2.901236	2.312455	Yes	TraesCS1A02G408700.1	A
Triticale.1486	Triticale.1486.1	467.0											1.0	Triticale.1486	1A	570974168.0	570975266.0	48.621719	0.0	0.148544	0.0	0.493511	0.0	0.0	No		A
Triticale.1488	Triticale.1488.1	291.0									Triticale.1488.1	Triticale.1488.1	1.0	Triticale.1488	1A	571097125.0	571097415.0	0.938628	0.0	0.0	0.0	1.367424	0.0	5.27635	No		A
Triticale.1489	Triticale.1489.1	1035.0											1.0	Triticale.1489	1A	571290110.0	571291679.0	0.239418	0.7594770000000001	4.515528	1.563467	0.0	0.0	14.651431	Yes		A
Triticale.1492	Triticale.1492.1	2349.0											1.0	Triticale.1492	1A	571579873.0	571585433.0	1.452495	3.235932	0.132651	11.291453	4.858175	0.0	0.0	No		A
Triticale.1491	Triticale.1491.1	376.0									Triticale.1491.1	Triticale.1491.1	1.0	Triticale.1491	1A	571707255.0	571707630.0	0.0	0.0	0.0	0.0	0.0	0.0	8.812628	No		A
Triticale.1493	Triticale.1493.1	831.0											1.0	Triticale.1493	1A	571787875.0	571789915.0	6.729655	0.0	0.0	0.0	0.0	0.0	0.0	Yes		A
Triticale.1494	Triticale.1494.1	1380.0											1.0	Triticale.1494	1A	571894430.0	571895809.0	5.888868	0.0	0.0	0.0	0.0	0.0	0.0	Yes		A
Triticale.1499	Triticale.1499.1	2487.0											1.0	Triticale.1499	1A	572206778.0	572212965.0	9.112652	9.707139	9.977641	0.687682	13.885266	9.365545	0.0	Yes	TraesCS1A02G411600.1	A
Triticale.1495	Triticale.1495.1	733.0											1.0	Triticale.1495	1A	572335064.0	572336936.0	5.919885	0.0	0.229098	2.428619	0.0	0.0	17.909356	Yes		A
Triticale.1497	Triticale.1497.1	2365.0											2.0	Triticale.1497	1A	572350605.0	572354408.0	84.29797099999998	42.914936	49.661949	66.057076	18.30846	114.508877	62.450559	Yes	TraesCS1A02G411900.1	A
Triticale.1497	Triticale.1497.2	1841.0											2.0	Triticale.1497	1A	572350605.0	572354408.0	84.29797099999998	42.914936	49.661949	66.057076	18.30846	114.508877	62.450559	Yes		A
Triticale.1496	Triticale.1496.1	1301.0											1.0	Triticale.1496	1A	572882227.0	572884883.0	1.11178	0.0	1.288726	0.0	15.067282	0.0	1.634413	Yes		A
Triticale.1498	Triticale.1498.1	1657.0											1.0	Triticale.1498	1A	573060338.0	573065094.0	26.63448	0.6495380000000001	0.615391	1.506542	0.0	0.0	2.547422	Yes	TraesCS1A02G412900.1	A
Triticale.1500	Triticale.1500.1	988.0											1.0	Triticale.1500	1A	573068179.0	573070666.0	316.06958	493.020506	449.989254	325.992752	141.424804	1145.050881	1193.442994	Yes	TraesCS1A02G413000.1	A
Triticale.1501	Triticale.1501.1	511.0									Triticale.1501.1	Triticale.1501.1	1.0	Triticale.1501	1A	573218525.0	573219128.0	0.0	0.772233	1.137214	1.705151	0.0	14.413432	0.0	Yes		A
Triticale.1503	Triticale.1503.1	2511.0											1.0	Triticale.1503	1A	573327648.0	573333885.0	22.899749	2.512557	0.831059	0.0	0.302601	0.0	0.0	Yes	TraesCS1A02G413700.1	A
Triticale.1502	Triticale.1502.1	1449.0											1.0	Triticale.1502	1A	573441183.0	573442631.0	10.361181	0.0	0.950425	0.0	0.0	0.0	0.742841	Yes	TraesCS1A02G413800.1	A
Triticale.1505	Triticale.1505.1	1174.0											1.0	Triticale.1505	1A	573503173.0	573506871.0	29.437252	7351-03-01	2.482369	0.7465470000000001	0.963153	6.519195	14.395354	Yes	TraesCS1A02G413900.1	A
Triticale.1504	Triticale.1504.1	474.0											1.0	Triticale.1504	1A	574347626.0	574348099.0	15.994295	0.744089	0.203931	0.0	0.0	7.723654	0.0	No		A
Triticale.1506	Triticale.1506.1	1465.0											1.0	Triticale.1506	1A	574640603.0	574644397.0	8.258002000000001	1.977819	3.722662	1.390892	0.0	8.470961	6.119125	Yes		A
Triticale.1508	Triticale.1508.1	859.0											2.0	Triticale.1508	1A	574933843.0	574935928.0	47.211943	40.231563	33.912068	18.462873	8.954516	23.390362	54.94187	Yes	TraesCS1A02G416600.1	A
Triticale.1508	Triticale.1508.2	818.0									Triticale.1508.2	Triticale.1508.2	2.0	Triticale.1508	1A	574933843.0	574935928.0	47.211943	40.231563	33.912068	18.462873	8.954516	23.390362	54.94187	Yes		A
Triticale.1507	Triticale.1507.1	610.0											1.0	Triticale.1507	1A	574937912.0	574938521.0	9.761728	0.0	0.324386	0.0	0.0	0.0	4.956307	Yes	TraesCS1A02G416700.1	A
Triticale.1509	Triticale.1509.1	667.0									Triticale.1509.1	Triticale.1509.1	1.0	Triticale.1509	1A	575367817.0	575370294.0	2.4514080000000003	0.0	1.516286	0.0	0.0	14.413432	0.0	Yes		A
Triticale.1510	Triticale.1510.1	323.0											1.0	Triticale.1510	1A	575586598.0	575586920.0	0.0	0.0	0.524597	0.0	0.0	10.531174	0.0	Yes	ENSRNA050013774-T1	A
Triticale.1512	Triticale.1512.1	2177.0											1.0	Triticale.1512	1A	575736809.0	575741899.0	19.632711	4.339794	0.549018	3.535624	2.866646	0.0	1.3863450000000002	Yes	TraesCS1A02G418300.1	A
Triticale.1511	Triticale.1511.1	921.0											1.0	Triticale.1511	1A	576219770.0	576222349.0	9.118243	0.457653	0.0	0.0	0.0	0.0	3.2769510000000004	Yes	TraesCS1A02G419400.1	A
Triticale.1517	Triticale.1517.1	1825.0											7.0	Triticale.1517	1A	576241854.0	576247670.0	9.746242	7.0889820000000014	22.024313	30.405981	22.411085	0.0	17.793946	No		A
Triticale.1517	Triticale.1517.2	2070.0											7.0	Triticale.1517	1A	576241854.0	576247670.0	9.746242	7.0889820000000014	22.024313	30.405981	22.411085	0.0	17.793946	No		A
Triticale.1517	Triticale.1517.3	1919.0											7.0	Triticale.1517	1A	576241854.0	576247670.0	9.746242	7.0889820000000014	22.024313	30.405981	22.411085	0.0	17.793946	No		A
Triticale.1517	Triticale.1517.4	1828.0											7.0	Triticale.1517	1A	576241854.0	576247670.0	9.746242	7.0889820000000014	22.024313	30.405981	22.411085	0.0	17.793946	No		A
Triticale.1517	Triticale.1517.5	3133.0											7.0	Triticale.1517	1A	576241854.0	576247670.0	9.746242	7.0889820000000014	22.024313	30.405981	22.411085	0.0	17.793946	No		A
Triticale.1517	Triticale.1517.6	3098.0											7.0	Triticale.1517	1A	576241854.0	576247670.0	9.746242	7.0889820000000014	22.024313	30.405981	22.411085	0.0	17.793946	No		A
Triticale.1517	Triticale.1517.7	3260.0											7.0	Triticale.1517	1A	576241854.0	576247670.0	9.746242	7.0889820000000014	22.024313	30.405981	22.411085	0.0	17.793946	No		A
Triticale.1515	Triticale.1515.1	2276.0											1.0	Triticale.1515	1A	576370871.0	576376064.0	18.217048	36.891203	46.463066	47.869341	65.41058100000001	89.045374	81.77646700000003	Yes		A
Triticale.1513	Triticale.1513.1	2138.0											1.0	Triticale.1513	1A	576780614.0	576784241.0	8.340527999999999	1.950008	0.877467	0.0	4.0567	0.0	9.017672	Yes		A
Triticale.1514	Triticale.1514.1	2652.0											1.0	Triticale.1514	1A	576892494.0	576896980.0	7.379482	0.738024	6545-02-01	6.191782	0.65246	0.0	7.214195	Yes	TraesCS1A02G420500.1	A
Triticale.1519	Triticale.1519.1	2524.0											1.0	Triticale.1519	1A	577307622.0	577313842.0	8.305219000000001	3.298566000000001	1.444046	2.228721	4.7824300000000015	0.0	5.763431	Yes	TraesCS1A02G420800.1	A
Triticale.1516	Triticale.1516.1	2482.0											1.0	Triticale.1516	1A	577468378.0	577474524.0	6.825283	0.348247	1.739116	1.761486	0.0	0.0	2.1067150000000003	Yes	TraesCS1A02G421000.1	A
Triticale.1521	Triticale.1521.1	715.0									Triticale.1521.1	Triticale.1521.1	2.0	Triticale.1521	1A	577510488.0	577537600.0	6.313005	21.519711	17.735817	25.504579	33.343984000000006	16.909838	38.002957	No		A
Triticale.1521	Triticale.1521.2	1087.0									Triticale.1521.2	Triticale.1521.2	2.0	Triticale.1521	1A	577510488.0	577537600.0	6.313005	21.519711	17.735817	25.504579	33.343984000000006	16.909838	38.002957	No		A
Triticale.1518	Triticale.1518.1	484.0											1.0	Triticale.1518	1A	577611767.0	577612635.0	330.493905	252.10954300000003	307.701054	112.920445	103.014249	607.746542	671.807956	Yes		A
Triticale.1520	Triticale.1520.1	560.0											1.0	Triticale.1520	1A	577838044.0	577838603.0	10.567941	0.0	0.0	0.0	0.0	0.0	2.826614	No		A
Triticale.1525	Triticale.1525.1	1891.0											1.0	Triticale.1525	1A	577840772.0	577845176.0	2.31505	2.593635	0.0	7.792658	0.0	9.016971	4.017951	Yes		A
Triticale.1523	Triticale.1523.1	2680.0											1.0	Triticale.1523	1A	577923154.0	577927544.0	2.280725	2.591358	3.571051	0.766682	9.000038	0.0	0.0	Yes		A
Triticale.1522	Triticale.1522.1	312.0									Triticale.1522.1	Triticale.1522.1	1.0	Triticale.1522	1A	578255996.0	578256307.0	2.617327	6.977828999999999	0.920949	7.011886	10.243487	0.0	6.426325	No		A
Triticale.1524	Triticale.1524.1	1772.0											1.0	Triticale.1524	1A	578563080.0	578564851.0	1.152626	6.653105	3.25933	3.167809	0.0	1.049283	2.992513	Yes		A
Triticale.1526	Triticale.1526.1	1067.0											1.0	Triticale.1526	1A	578911153.0	578912219.0	19.420005	0.0	0.6508520000000001	0.0	0.0	0.0	0.0	Yes	TraesCS1A02G423700.1	A
Triticale.1527	Triticale.1527.1	299.0									Triticale.1527.1	Triticale.1527.1	1.0	Triticale.1527	1A	579066759.0	579067057.0	0.0	0.0	0.0	0.0	0.8852180000000001	4.242075	7.129250999999999	No		A
Triticale.1528	Triticale.1528.1	292.0									Triticale.1528.1	Triticale.1528.1	1.0	Triticale.1528	1A	579070339.0	579070630.0	0.0	0.0	0.0	0.0	0.0	23.545234	0.0	No		A
Triticale.1530	Triticale.1530.1	946.0											1.0	Triticale.1530	1A	579073639.0	579074584.0	0.0	0.0	0.0	0.0	0.0	0.0	8.265908	No		A
Triticale.1531	Triticale.1531.1	825.0											1.0	Triticale.1531	1A	579075244.0	579076068.0	0.0	0.0	0.0	0.0	0.0	0.0	5.372284	No		A
Triticale.1533	Triticale.1533.1	1090.0											1.0	Triticale.1533	1A	579172661.0	579173750.0	0.0	0.6754479999999999	0.133545	4.173708	11.749796	0.0	0.0	Yes		A
Triticale.1534	Triticale.1534.1	1656.0											1.0	Triticale.1534	1A	579296469.0	579299724.0	4.473218	8141-03-01	6.46619	6.5662720000000006	1.603746	5.657445	5.849868	Yes	TraesCS1A02G424200.1	A
Triticale.1535	Triticale.1535.1	958.0									Triticale.1535.1	Triticale.1535.1	1.0	Triticale.1535	1A	579682358.0	579686554.0	0.0	4.7142800000000005	8.457883	8.191133	0.0	0.0	1.773471	Yes		A
Triticale.1536	Triticale.1536.1	1075.0											1.0	Triticale.1536	1A	579828424.0	579830794.0	6.800903999999999	0.637793	1.557543	0.0	0.0	0.0	0.0	No		A
Triticale.1537	Triticale.1537.1	508.0											1.0	Triticale.1537	1A	579843319.0	579844052.0	11.418739	0.0	0.0	0.0	0.0	0.0	0.0	No		A
Triticale.1538	Triticale.1538.1	1771.0											1.0	Triticale.1538	1A	579864119.0	579869349.0	29.899877000000004	2.674712	4.953186	6.595304	11.874855	26.11672	12.962957	Yes	TraesCS1A02G425000.1	A
Triticale.1539	Triticale.1539.1	2448.0											2.0	Triticale.1539	1A	580183088.0	580189536.0	1.677107	21.299824	17.319746	4.474628	20.158696	17.828377	0.737138	Yes	TraesCS1A02G425100.1	A
Triticale.1539	Triticale.1539.2	2416.0											2.0	Triticale.1539	1A	580183088.0	580189536.0	1.677107	21.299824	17.319746	4.474628	20.158696	17.828377	0.737138	Yes	TraesCS1A02G425100.2	A
Triticale.1541	Triticale.1541.1	945.0											1.0	Triticale.1541	1A	580495350.0	580497018.0	5.040778	4.446912	4.452986	4.563308	5.016756	15.404831	13.193666	Yes		A
Triticale.1542	Triticale.1542.1	201.0											1.0	Triticale.1542	1A	581206186.0	581206386.0	90.528539	6.527082	4.001938	0.0	0.0	0.0	0.0	Yes	TraesCS1A02G426400.1	A
Triticale.1540	Triticale.1540.1	454.0									Triticale.1540.1	Triticale.1540.1	1.0	Triticale.1540	1A	581245247.0	581245700.0	9.870062	0.0	0.0	0.0	0.0	0.0	0.0	No		A
Triticale.1544	Triticale.1544.1	584.0									Triticale.1544.1	Triticale.1544.1	1.0	Triticale.1544	1A	581256081.0	581256664.0	11.853389	184.790783	105.421456	6.452712	16.192574	114.098109	13.624548	Yes	TraesCS1A02G426600.1	A
Triticale.1543	Triticale.1543.1	551.0									Triticale.1543.1	Triticale.1543.1	1.0	Triticale.1543	1A	581433669.0	581434219.0	32.395431	0.0	0.0	0.0	0.0	0.0	0.0	No		A
Triticale.1545	Triticale.1545.1	2014.0											1.0	Triticale.1545	1A	581570171.0	581576506.0	7.770942999999999	0.386763	0.726899	0.8712030000000001	4.99307	0.0	0.0	Yes	TraesCS1A02G427000.1	A
Triticale.1547	Triticale.1547.1	1632.0											1.0	Triticale.1547	1A	581582992.0	581585986.0	3.912674	4.015073	1.175772	7.916624	0.0	2.331589	1.322322	Yes		A
Triticale.1548	Triticale.1548.1	1387.0											1.0	Triticale.1548	1A	582276530.0	582279794.0	6.857328	0.0	0.8969809999999999	1.571148	0.0	0.0	2.381396	Yes	TraesCS1A02G428400.1	A
Triticale.1553	Triticale.1553.1	3972.0											1.0	Triticale.1553	1A	582417093.0	582427720.0	3.166568	3.792553	2.1330880000000003	8.560098	0.495013	0.0	7.22509	Yes		A
Triticale.1550	Triticale.1550.1	1779.0											1.0	Triticale.1550	1A	582708056.0	582712150.0	24.171113	1.6789580000000002	4.536925	8.838222	12.242492	0.0	9.363373	Yes	TraesCS1A02G429400.1	A
Triticale.1549	Triticale.1549.1	1052.0											1.0	Triticale.1549	1A	582862534.0	582863709.0	0.0	0.0	0.0	0.0	0.0	14.413432	0.0	Yes	TraesCS1A02G430200.1	A
Triticale.1552	Triticale.1552.1	997.0											1.0	Triticale.1552	1A	583260318.0	583262020.0	1.373578	226.689407	161.01106399999995	1.667525	3.566777	16.162703	0.0	Yes	TraesCS1A02G430600.1	A
Triticale.1551	Triticale.1551.1	1158.0											1.0	Triticale.1551	1A	583292150.0	583294430.0	0.742472	0.0	0.227181	0.334257	0.0	14.413432	0.0	Yes		A
Triticale.1554	Triticale.1554.1	1051.0									Triticale.1554.1	Triticale.1554.1	1.0	Triticale.1554	1A	584333306.0	584334356.0	0.0	0.0	0.0	0.0	8.622402000000001	0.0	0.0	No		A
Triticale.1555	Triticale.1555.1	1425.0											1.0	Triticale.1555	1A	584468934.0	584480540.0	1.773842	4.476227	5.613449	0.0	0.0	14.413432	2.640027	Yes	TraesCS1A02G432900.2	A
Triticale.1556	Triticale.1556.1	1757.0											1.0	Triticale.1556	1A	584506329.0	584509916.0	25.985616	0.0	0.5527489999999999	0.260092	0.0	0.0	1.864889	Yes	TraesCS1A02G433000.1	A
Triticale.1557	Triticale.1557.1	784.0											1.0	Triticale.1557	1A	584671925.0	584674819.0	5.734728	0.0	0.189052	1.694276	3.630947	14.413432	0.0	Yes		A
Triticale.1558	Triticale.1558.1	2210.0											1.0	Triticale.1558	1A	584679447.0	584685000.0	7.346353999999999	0.0	0.0	0.0	0.0	0.0	0.0	Yes	TraesCS1A02G433500.1	A
Triticale.1559	Triticale.1559.1	452.0									Triticale.1559.1	Triticale.1559.1	1.0	Triticale.1559	1A	584795751.0	584797080.0	18.130881	0.790804	0.0	0.0	0.0	0.0	0.0	No		A
Triticale.1560	Triticale.1560.1	985.0											1.0	Triticale.1560	1A	585304050.0	585305190.0	0.0	0.0	0.0	38.707793	0.0	0.0	12.67395	Yes		A
Triticale.1561	Triticale.1561.1	727.0											1.0	Triticale.1561	1A	585743068.0	585743794.0	0.0	7.754662	15.066917000000002	3.337593	0.0	0.0	0.0	Yes	TraesCS1A02G435200.1	A
Triticale.1562	Triticale.1562.1	1034.0											1.0	Triticale.1562	1A	585839000.0	585840033.0	0.763429	0.0	0.0	0.0	12.098828	0.0	0.0	No		A
Triticale.1564	Triticale.1564.1	1642.0											1.0	Triticale.1564	1A	586717508.0	586720673.0	6.916233999999998	1.7834020000000002	2.75831	4.998106	0.66232	0.0	0.0	Yes	TraesCS1A02G436500.1	A
Triticale.1566	Triticale.1566.1	2056.0											1.0	Triticale.1566	1A	586726477.0	586731280.0	0.0	7.469556	4.058424	6.159609	7.642684	4.500695	19.765781	No		A
Triticale.1565	Triticale.1565.1	1977.0											1.0	Triticale.1565	1A	586951818.0	586954179.0	4.878775	6.580831	4.619226	14.844388	12.612012	9.966196	9.287658	Yes		A
Triticale.1568	Triticale.1568.1	1162.0											1.0	Triticale.1568	1A	587359674.0	587362070.0	6.172162999999999	0.609776	2.651542	0.0	0.0	2.741276	3.723414	Yes	TraesCS1A02G437600.1	A
Triticale.1567	Triticale.1567.1	1185.0									Triticale.1567.1	Triticale.1567.1	1.0	Triticale.1567	1A	587740931.0	587772056.0	0.792883	16.683622	11.886528	2.8706970000000003	0.0	12.284871	0.0	Yes		A
Triticale.1569	Triticale.1569.1	618.0											1.0	Triticale.1569	1A	587857018.0	587871331.0	6.42155	0.0	0.0	1.553398	0.0	0.0	0.0	Yes		A
Triticale.1571	Triticale.1571.1	3816.0											1.0	Triticale.1571	1A	588297015.0	588302842.0	6.5015220000000005	5.907196	3.246842	11.548198	33.692278	20.898726	10.883163	Yes	TraesCS1A02G438600.2	A
Triticale.1570	Triticale.1570.1	1416.0											1.0	Triticale.1570	1A	588766817.0	588771145.0	24.666817	7.853866	9.51587	6.199235	11.866304	15.441513	23.326236	No		A
Triticale.1572	Triticale.1572.1	990.0											1.0	Triticale.1572	1A	588899891.0	588903671.0	49.350958	12.194353	8.563185	11.145487	13.227642	15.7383	27.719488	Yes	TraesCS1A02G439300.1	A
Triticale.1573	Triticale.1573.1	663.0											1.0	Triticale.1573	1A	589038754.0	589039627.0	20.638483	0.715659	0.722122	0.0	0.0	2.217449	0.0	Yes	TraesCS1A02G439600.1	A
Triticale.1578	Triticale.1578.1	1621.0											1.0	Triticale.1578	1A	589440075.0	589444328.0	8.791022	2.523157	3.459115	0.706886	1.192958	0.0	4.765314	Yes	TraesCS1A02G440200.1	A
Triticale.1574	Triticale.1574.1	373.0											1.0	Triticale.1574	1A	589575362.0	589575837.0	6.39676	0.790804	4.015311	0.0	5.329227	0.0	0.0	No		A
Triticale.1575	Triticale.1575.1	637.0											1.0	Triticale.1575	1A	589575975.0	589577050.0	9.919689	0.0	0.0	0.0	1.173039	0.0	0.0	No		A
Triticale.1576	Triticale.1576.1	754.0											1.0	Triticale.1576	1A	589609023.0	589646362.0	15.051654	4.393471	3.495099	0.0	4.186149	0.0	7.550636	Yes		A
Triticale.1577	Triticale.1577.1	566.0											1.0	Triticale.1577	1A	590000985.0	590001667.0	0.0	1.581607	1.137214	4.407483999999998	0.0	0.0	6.982310000000001	Yes		A
Triticale.1579	Triticale.1579.1	2016.0											1.0	Triticale.1579	1A	590342175.0	590345235.0	4.249898	1.137957	1.389177	7.659647	0.0	0.0	1.879177	Yes		A
Triticale.1580	Triticale.1580.1	1055.0											1.0	Triticale.1580	1A	590766142.0	590767470.0	3.556998	7.2056830000000005	6.808553999999999	0.0	0.0	0.0	0.0	Yes		A
Triticale.1581	Triticale.1581.1	488.0											1.0	Triticale.1581	1A	590995475.0	590995962.0	0.0	0.51694	0.0	0.0	0.0	0.0	8.552446	Yes		A
Triticale.1583	Triticale.1583.1	3481.0											1.0	Triticale.1583	1A	591089283.0	591094977.0	1.954104	2.923089	0.822501	8.656543	6.271131	0.0	1.521821	Yes		A
Triticale.1582	Triticale.1582.1	780.0											1.0	Triticale.1582	1A	591147298.0	591148077.0	9.49097	2.367342	1.0210629999999998	2.69545	0.0	0.0	8.036287	Yes		A
Triticale.1584	Triticale.1584.1	2353.0											1.0	Triticale.1584	1A	591153190.0	591157852.0	21.393769	0.987413	0.403881	0.8688799999999999	0.0	0.0	0.0	Yes	TraesCS1A02G442600.1	A
Triticale.1585	Triticale.1585.1	1849.0											1.0	Triticale.1585	1A	591926034.0	591930409.0	18.304509	10.786408	17.618109	12.710705	0.264873	0.0	12.142168	Yes	TraesCS1A02G443400.1	A
Triticale.1588	Triticale.1588.1	1689.0											1.0	Triticale.1588	1A	591948561.0	591953758.0	0.0	0.0	3.002721	5.866567	0.0	0.0	8.565869000000001	Yes	TraesCS1A02G443600.1	A
Triticale.1589	Triticale.1589.1	892.0											1.0	Triticale.1589	1A	591953902.0	591956220.0	13.820557	0.0	0.6880229999999999	0.0	0.0	0.0	0.0	Yes	TraesCS1A02G443700.1	A
Triticale.1586	Triticale.1586.1	686.0											1.0	Triticale.1586	1A	592099464.0	592101364.0	17.812034	0.0	0.0	0.0	0.0	0.0	0.0	Yes	TraesCS1A02G444100.1	A
Triticale.1587	Triticale.1587.1	1551.0											1.0	Triticale.1587	1A	592308531.0	592312286.0	7.676655999999999	0.0	0.6161439999999999	1.7898029999999998	0.0	0.0	0.0	Yes	TraesCS1A02G444200.1	A
Triticale.1590	Triticale.1590.1	572.0											1.0	Triticale.1590	1A	592313094.0	592314020.0	0.938628	0.0	0.379071	0.0	0.0	14.413432	0.0	Yes		A
Triticale.1591	Triticale.1591.1	1761.0											1.0	Triticale.1591	1A	592323640.0	592329619.0	0.426939	26.789429	23.630937	18.145673	15.604725	17.965636	3.119067	Yes	TraesCS1A02G444400.1	A
Triticale.1592	Triticale.1592.1	1012.0											1.0	Triticale.1592	1A	592757181.0	592759061.0	3.325079	7.090665	8.415985000000001	8.38422	1.773857	0.0	6.360819	Yes	TraesCS1A02G444800.1	A
Triticale.1595	Triticale.1595.1	1686.0											1.0	Triticale.1595	1A	592833042.0	592840879.0	2.549772	0.0	0.674504	7.054228	1.49191	3.257133	5.798977	Yes		A
Triticale.1593	Triticale.1593.1	668.0											1.0	Triticale.1593	1A	592977239.0	592978702.0	15.414289000000002	0.0	0.0	0.0	0.0	0.0	0.0	Yes	TraesCS1A02G445300.1	A
Triticale.1594	Triticale.1594.1	754.0											1.0	Triticale.1594	1A	593300932.0	593301896.0	3.39848	2.694396	3.490574	1.589816	0.0	0.0	7.998498	Yes		A
Triticale.1598	Triticale.1598.1	1389.0											1.0	Triticale.1598	1A	593397159.0	593400134.0	103.095646	11.065559	9.743964	9.403497	5.034785	37.616044	62.28675500000001	Yes		A
Triticale.1597	Triticale.1597.1	1175.0											1.0	Triticale.1597	1A	593403273.0	593406438.0	8.462828	4.262264	1.635976	3.207135	0.0	0.0	6.672899	Yes	TraesCS1A02G445800.1	A
Triticale.1596	Triticale.1596.1	711.0									Triticale.1596.1	Triticale.1596.1	1.0	Triticale.1596	1A	593548139.0	593548849.0	1.945903	2.135504	5.517595	5.767775	4.173415	0.0	11.116699	Yes		A
Triticale.1599	Triticale.1599.1	733.0											1.0	Triticale.1599	1B	1198799.0	1199794.0	43.65323	0.0	0.375968	3.280032	0.0	0.0	0.0	Yes	TraesCS1B02G000600.1	B
Triticale.1600	Triticale.1600.1	1953.0											1.0	Triticale.1600	1B	1203582.0	1207214.0	11.043414	0.0	0.166729	0.22613	0.27105	0.0	0.62949	Yes	TraesCS1B02G000800.5	B
Triticale.1601	Triticale.1601.1	1540.0											1.0	Triticale.1601	1B	1208528.0	1212958.0	6.817241	0.0	0.0	0.0	0.0	0.0	0.0	Yes	TraesCS1B02G000900.1	B
Triticale.1602	Triticale.1602.1	896.0											1.0	Triticale.1602	1B	1258800.0	1260785.0	63.872778	6.816269	5.453806	2.93834	5.586514	18.113302	23.413802	Yes	TraesCS1B02G001100.1	B
Triticale.1604	Triticale.1604.1	807.0											1.0	Triticale.1604	1B	1279703.0	1280509.0	5.580589	0.0	0.05167	0.0	0.0	0.0	0.0	Yes		B
Triticale.1605	Triticale.1605.1	928.0											1.0	Triticale.1605	1B	1778903.0	1779941.0	0.0	0.0	0.0	0.0	0.0	14.413432	0.0	Yes		B
Triticale.1606	Triticale.1606.1	659.0											1.0	Triticale.1606	1B	2117365.0	2118464.0	26.070775	17.704884	12.859667	22.428297	9.245895	10.432788	31.738162	Yes	TraesCS1B02G003500.1	B
Triticale.1607	Triticale.1607.1	216.0									Triticale.1607.1	Triticale.1607.1	1.0	Triticale.1607	1B	2857551.0	2857878.0	1.568725	3.932052	2.8728700000000003	6.820604	6.426945	0.0	0.0	No		B
Triticale.1608	Triticale.1608.1	763.0									Triticale.1608.1	Triticale.1608.1	1.0	Triticale.1608	1B	3051723.0	3053945.0	5.454619999999999	8.494662	3.125476	0.0	5.160933	0.0	0.0	No		B
Triticale.1609	Triticale.1609.1	801.0											1.0	Triticale.1609	1B	3573978.0	3575838.0	0.0	0.0	0.732114	0.0	0.0	14.413432	0.0	Yes	TraesCS1B02G005500.1	B
Triticale.1610	Triticale.1610.1	698.0											1.0	Triticale.1610	1B	3921456.0	3922153.0	0.623958	3.688906	5.874521	20.94795	2.966513	0.0	5.246111	No		B
Triticale.1611	Triticale.1611.1	3315.0											1.0	Triticale.1611	1B	4345226.0	4352704.0	8.429528	0.303439	0.0	1.293652	1.413822	0.0	0.0	Yes		B
Triticale.1612	Triticale.1612.1	1270.0											1.0	Triticale.1612	1B	4475908.0	4479190.0	5.744106	4.170088	3.585658	0.0	9.435141	0.0	0.0	Yes	TraesCS1B02G008200.1	B
Triticale.1613	Triticale.1613.1	1835.0											1.0	Triticale.1613	1B	4516858.0	4541681.0	0.375963	3.778189	2.236418	1.495143	7.252223	0.0	0.0	Yes		B
Triticale.1628	Triticale.1628.1	1405.0											1.0	Triticale.1628	1B	4965398.0	5058229.0	0.0	637.182856	869.0455939999998	344.251235	640.2966150000002	1068.855615	705.503417	Yes		B
Triticale.1629	Triticale.1629.3	538.0											3.0	Triticale.1629	1B	4965568.0	5143342.0	0.0	6844.999277	6739.400648000002	8049.319955	11697.148386	2912.834338	2456.017471	Yes		B
Triticale.1629	Triticale.1629.1	3160.0											3.0	Triticale.1629	1B	4965568.0	5143342.0	0.0	6844.999277	6739.400648000002	8049.319955	11697.148386	2912.834338	2456.017471	Yes		B
Triticale.1629	Triticale.1629.2	3313.0											3.0	Triticale.1629	1B	4965568.0	5143342.0	0.0	6844.999277	6739.400648000002	8049.319955	11697.148386	2912.834338	2456.017471	Yes		B
Triticale.1630	Triticale.1630.1	1164.0											3.0	Triticale.1630	1B	4991533.0	4992864.0	0.0	139.30702	157.893535	33.121243	137.304687	115.699787	284.8113390000001	Yes		B
Triticale.1630	Triticale.1630.2	709.0									Triticale.1630.2	Triticale.1630.2	3.0	Triticale.1630	1B	4991533.0	4992864.0	0.0	139.30702	157.893535	33.121243	137.304687	115.699787	284.8113390000001	Yes		B
Triticale.1630	Triticale.1630.3	706.0											3.0	Triticale.1630	1B	4991533.0	4992864.0	0.0	139.30702	157.893535	33.121243	137.304687	115.699787	284.8113390000001	Yes		B
Triticale.1631	Triticale.1631.2	640.0									Triticale.1631.2	Triticale.1631.2	1.0	Triticale.1631	1B	5099170.0	5177354.0	2.08391	6182.907359000002	6236.456522	13896.203492	245.288176	1916.513568	2700.466819	Yes		B
Triticale.1614	Triticale.1614.1	941.0											2.0	Triticale.1614	1B	5272225.0	5273777.0	0.0	123.647838	44.775395	8.374032000000001	18.437282	0.0	23.262154	Yes		B
Triticale.1614	Triticale.1614.2	959.0											2.0	Triticale.1614	1B	5272225.0	5273777.0	0.0	123.647838	44.775395	8.374032000000001	18.437282	0.0	23.262154	Yes		B
Triticale.1639	Triticale.1639.1	2437.0											8.0	Triticale.1639	1B	5341864.0	5436087.0	0.0	583.377167	259.523074	63.37915699999999	164.414065	0.0	52.841551	Yes		B
Triticale.1639	Triticale.1639.3	1554.0											8.0	Triticale.1639	1B	5341864.0	5436087.0	0.0	583.377167	259.523074	63.37915699999999	164.414065	0.0	52.841551	Yes		B
Triticale.1639	Triticale.1639.2	2476.0											8.0	Triticale.1639	1B	5341864.0	5436087.0	0.0	583.377167	259.523074	63.37915699999999	164.414065	0.0	52.841551	Yes		B
Triticale.1639	Triticale.1639.4	980.0											8.0	Triticale.1639	1B	5341864.0	5436087.0	0.0	583.377167	259.523074	63.37915699999999	164.414065	0.0	52.841551	Yes		B
Triticale.1639	Triticale.1639.5	1192.0											8.0	Triticale.1639	1B	5341864.0	5436087.0	0.0	583.377167	259.523074	63.37915699999999	164.414065	0.0	52.841551	Yes		B
Triticale.1639	Triticale.1639.6	1075.0											8.0	Triticale.1639	1B	5341864.0	5436087.0	0.0	583.377167	259.523074	63.37915699999999	164.414065	0.0	52.841551	Yes		B
Triticale.1639	Triticale.1639.7	1075.0											8.0	Triticale.1639	1B	5341864.0	5436087.0	0.0	583.377167	259.523074	63.37915699999999	164.414065	0.0	52.841551	Yes		B
Triticale.1639	Triticale.1639.8	1207.0											8.0	Triticale.1639	1B	5341864.0	5436087.0	0.0	583.377167	259.523074	63.37915699999999	164.414065	0.0	52.841551	Yes		B
Triticale.1616	Triticale.1616.1	1372.0											1.0	Triticale.1616	1B	5519390.0	5520761.0	0.0	240.000964	329.707279	603.280047	1249.642185	535.933838	150.7298	Yes	TraesCS1B02G011523.1	B
Triticale.1617	Triticale.1617.1	424.0									Triticale.1617.1	Triticale.1617.1	1.0	Triticale.1617	1B	5519512.0	5520130.0	0.0	1.66333	1.944632	5.265377	13.951326000000002	0.0	2.787369	Yes		B
Triticale.1621	Triticale.1621.1	1704.0											1.0	Triticale.1621	1B	5583714.0	5585618.0	0.0	31747.769760000006	31390.585322000006	87278.351563	229456.044385	13416.147849	7728.525573000001	Yes		B
Triticale.1622	Triticale.1622.1	300.0									Triticale.1622.1	Triticale.1622.1	1.0	Triticale.1622	1B	5585254.0	5601952.0	0.0	135.111161	135.001001	270.394047	670.053416	0.0	90.406349	Yes		B
Triticale.1619	Triticale.1619.1	1211.0											5.0	Triticale.1619	1B	5686431.0	5687765.0	0.0	649.043415	761.407725	1490.459192	4440.266549	632.399708	561.13214	Yes		B
Triticale.1619	Triticale.1619.2	1267.0											5.0	Triticale.1619	1B	5686431.0	5687765.0	0.0	649.043415	761.407725	1490.459192	4440.266549	632.399708	561.13214	Yes		B
Triticale.1619	Triticale.1619.3	1273.0											5.0	Triticale.1619	1B	5686431.0	5687765.0	0.0	649.043415	761.407725	1490.459192	4440.266549	632.399708	561.13214	Yes		B
Triticale.1619	Triticale.1619.4	1249.0											5.0	Triticale.1619	1B	5686431.0	5687765.0	0.0	649.043415	761.407725	1490.459192	4440.266549	632.399708	561.13214	Yes		B
Triticale.1620	Triticale.1620.1	1151.0											1.0	Triticale.1620	1B	5686608.0	5687758.0	0.0	3109.362603	3367.202673	8210.629901	25106.884239	1561.61569	454.962106	Yes	TraesCS1B02G011700.1	B
Triticale.1619	Triticale.1619.5	311.0									Triticale.1619.5	Triticale.1619.5	5.0	Triticale.1619	1B	5686431.0	5687765.0	0.0	649.043415	761.407725	1490.459192	4440.266549	632.399708	561.13214	Yes		B
Triticale.1618	Triticale.1618.1	1969.0											1.0	Triticale.1618	1B	6101789.0	6103757.0	0.0	0.25664	1.767139	10.723659	1.282055	0.0	0.0	No		B
Triticale.1624	Triticale.1624.1	639.0											1.0	Triticale.1624	1B	6390703.0	6391706.0	22.496217	11.819979	26.889156	28.798105	26.067047	34.714044	145.09549199999995	No		B
Triticale.1623	Triticale.1623.1	2240.0	Triticale.1623.1	LTR	Copia	retrofit	no	+	GAG|retrofit INT|retrofit	Triticale.1623			1.0	Triticale.1623	1B	6396451.0	6399010.0	1.695396	12.236628	13.112318	8.549352	7.81951	13.8665	4.169261	No		B
Triticale.1635	Triticale.1635.1	1576.0											3.0	Triticale.1635	1B	6435893.0	6437531.0	0.0	547.38773	785.992117	1678.574268	6529.614572	753.853034	498.341156	Yes		B
Triticale.1635	Triticale.1635.2	1552.0											3.0	Triticale.1635	1B	6435893.0	6437531.0	0.0	547.38773	785.992117	1678.574268	6529.614572	753.853034	498.341156	Yes		B
Triticale.1635	Triticale.1635.3	1594.0											3.0	Triticale.1635	1B	6435893.0	6437531.0	0.0	547.38773	785.992117	1678.574268	6529.614572	753.853034	498.341156	Yes		B
Triticale.1636	Triticale.1636.3	748.0											3.0	Triticale.1636	1B	6436426.0	6437660.0	0.0	3696.868371	5175.187933	11707.420768	26709.04413	5429.650746	2453.248706	Yes		B
Triticale.1636	Triticale.1636.1	1148.0											3.0	Triticale.1636	1B	6436426.0	6437660.0	0.0	3696.868371	5175.187933	11707.420768	26709.04413	5429.650746	2453.248706	Yes	TraesCS1B02G013500.1	B
Triticale.1636	Triticale.1636.2	873.0											3.0	Triticale.1636	1B	6436426.0	6437660.0	0.0	3696.868371	5175.187933	11707.420768	26709.04413	5429.650746	2453.248706	Yes		B
Triticale.1625	Triticale.1625.1	1518.0											1.0	Triticale.1625	1B	6468599.0	6470116.0	22.325488	0.931461	1.422891	1.370411	3.455196	4.766493	4.181454	No		B
Triticale.1626	Triticale.1626.1	523.0											1.0	Triticale.1626	1B	6476873.0	6477639.0	7.679517999999999	0.0	0.0	0.0	0.0	0.0	6.759378999999999	Yes		B
Triticale.1627	Triticale.1627.1	1679.0											1.0	Triticale.1627	1B	6672891.0	6674569.0	13.755172	0.637729	0.653159	1.594453	0.0	0.0	1.552423	No		B
Triticale.1632	Triticale.1632.1	1205.0											1.0	Triticale.1632	1B	7319290.0	7322910.0	4.296655	17.080048	19.168432	19.434477	27.069441	12.631196	53.722437	Yes		B
Triticale.1633	Triticale.1633.1	1548.0											1.0	Triticale.1633	1B	7603702.0	7605290.0	6.592828999999999	0.962451	0.0	0.0	0.0	0.0	0.0	No		B
Triticale.1634	Triticale.1634.1	717.0											1.0	Triticale.1634	1B	8180389.0	8182007.0	9.714862	1.715063	2.315138	1.369828	0.0	0.0	3.532284	Yes	TraesCS1B02G016800.1	B
Triticale.1637	Triticale.1637.1	951.0											1.0	Triticale.1637	1B	8204014.0	8205195.0	7.527774000000001	8.888435000000003	0.0	2.386493	1.66612	3.591986	0.0	Yes	TraesCS1B02G017000.1	B
Triticale.1638	Triticale.1638.1	452.0											1.0	Triticale.1638	1B	8395175.0	8396240.0	8.084242	0.0	0.0	0.0	0.0	0.0	0.0	Yes	TraesCS1B02G017400.1	B
Triticale.1642	Triticale.1642.1	641.0											1.0	Triticale.1642	1B	8562360.0	8563233.0	1.259314	8.132572	6.166268	0.0	0.0	9.871284	0.0	No		B
Triticale.1643	Triticale.1643.1	1549.0											2.0	Triticale.1643	1B	8603466.0	8615382.0	0.0	0.0	1.115189	29.676908	7.867374000000001	0.0	3.872049	No		B
Triticale.1643	Triticale.1643.2	1548.0											2.0	Triticale.1643	1B	8603466.0	8615382.0	0.0	0.0	1.115189	29.676908	7.867374000000001	0.0	3.872049	No		B
Triticale.1644	Triticale.1644.1	784.0											1.0	Triticale.1644	1B	8676716.0	8677665.0	2.356147	0.0	0.866449	1.705151	0.0	14.174428	4.724486	Yes		B
Triticale.1645	Triticale.1645.1	453.0											1.0	Triticale.1645	1B	8702667.0	8703212.0	10.720662	0.0	0.0	0.0	0.0	0.0	0.0	No		B
Triticale.1646	Triticale.1646.1	569.0											1.0	Triticale.1646	1B	8710300.0	8710965.0	0.0	48.949221	40.034341	3.1945360000000003	10.005842	85.112712	6.472572	Yes	TraesCS1B02G018000.1	B
Triticale.1647	Triticale.1647.1	678.0											1.0	Triticale.1647	1B	8715177.0	8715969.0	0.0	0.0	0.0	26.553073	0.0	0.0	22.755234	Yes	TraesCS1B02G018100.1	B
Triticale.1648	Triticale.1648.1	1068.0											1.0	Triticale.1648	1B	8946401.0	8948562.0	15.333555	1.7622779999999998	1.158865	0.0	0.0	0.0	1.126411	Yes	TraesCS1B02G018900.1	B
Triticale.1649	Triticale.1649.1	1144.0											1.0	Triticale.1649	1B	9069399.0	9073186.0	24.733332	5.533551999999999	9.839621	2.079271	0.8514809999999999	27.327564	5.728343	Yes	TraesCS1B02G019100.2	B
Triticale.1650	Triticale.1650.1	1317.0											1.0	Triticale.1650	1B	9077743.0	9081146.0	5.105793	1.557589	2.748772	3.025768	0.0	0.0	9.246634	Yes		B
Triticale.1651	Triticale.1651.1	362.0									Triticale.1651.1	Triticale.1651.1	1.0	Triticale.1651	1B	9252803.0	9253164.0	3.259268	6.280554	3.71113	3.344357	0.0	0.0	10.508974	No		B
Triticale.1652	Triticale.1652.1	1473.0											1.0	Triticale.1652	1B	9839638.0	9844478.0	3.215421	5.300479	0.303669	3.732115	15.629171	0.0	1.808933	Yes		B
Triticale.1653	Triticale.1653.1	1227.0											1.0	Triticale.1653	1B	10103656.0	10105921.0	2.522132	0.0	1.145865	0.932482	27.998697	0.0	11.438541	Yes		B
Triticale.1654	Triticale.1654.1	850.0											1.0	Triticale.1654	1B	10111345.0	10114127.0	68.312219	2.713853	1.915872	0.7081390000000001	1.580243	0.0	11.161031	Yes	TraesCS1B02G022800.1	B
Triticale.1655	Triticale.1655.1	965.0											1.0	Triticale.1655	1B	11633554.0	11634917.0	0.0	0.628546	0.5978720000000001	84.56665100000002	0.0	0.0	127.813426	Yes	TraesCS1B02G024200.1	B
Triticale.1656	Triticale.1656.1	1085.0											1.0	Triticale.1656	1B	11691671.0	11693601.0	13.274878	0.280608	0.0	0.0	0.0	0.0	6.282988	Yes	TraesCS1B02G024300.1	B
Triticale.1657	Triticale.1657.1	1058.0											1.0	Triticale.1657	1B	11695754.0	11697252.0	0.35132	0.0	0.0	0.0	0.0	0.0	14.273075	Yes		B
Triticale.1660	Triticale.1660.1	1781.0											1.0	Triticale.1660	1B	11856934.0	11860211.0	74.39770899999998	19.35582	28.12748400000001	28.350887	31.790085	26.811736	56.88740799999999	Yes		B
Triticale.1659	Triticale.1659.1	1510.0									Triticale.1659.1	Triticale.1659.1	1.0	Triticale.1659	1B	12928391.0	12929900.0	0.0	0.0	0.0	0.301506	9.173241	0.0	0.0	No		B
Triticale.1661	Triticale.1661.1	387.0									Triticale.1661.1	Triticale.1661.1	1.0	Triticale.1661	1B	14711044.0	14711430.0	119.438553	19.034461	24.288978	30.996737	8.816623	58.473102	114.839003	No		B
Triticale.1662	Triticale.1662.1	1092.0											1.0	Triticale.1662	1B	14864455.0	14866465.0	0.369606	1.581607	0.993848	4.333145	0.0	0.0	12.316314	Yes	TraesCS1B02G030100.1	B
Triticale.1663	Triticale.1663.1	1583.0											1.0	Triticale.1663	1B	15140855.0	15142817.0	4.7109260000000015	11.417947	12.249778	26.629655	10.409722	8.686297999999999	10.522703	Yes		B
Triticale.1665	Triticale.1665.1	1451.0											1.0	Triticale.1665	1B	15165827.0	15168272.0	3.943401	6.556422	5.681108	7.826536999999999	0.0	10.757926	10.79997	Yes		B
Triticale.1664	Triticale.1664.1	852.0											1.0	Triticale.1664	1B	15279969.0	15284855.0	9793-10-01	0.0	0.972149	0.0	0.0	0.0	0.0	No		B
Triticale.1666	Triticale.1666.1	1319.0											1.0	Triticale.1666	1B	15438996.0	15441928.0	12.904529	1.597795	0.147145	3.173728	0.0	10.577859	4.320286	Yes	TraesCS1B02G031500.1	B
Triticale.1667	Triticale.1667.1	1906.0											1.0	Triticale.1667	1B	16188298.0	16191455.0	11.964302	1.055926	0.0	0.0	0.0	0.0	0.0	Yes	TraesCS1B02G033000.1	B
Triticale.1669	Triticale.1669.1	721.0											1.0	Triticale.1669	1B	16501939.0	16502749.0	0.0	120.637605	91.609631	86.69545600000002	174.103479	0.0	88.468509	Yes	TraesCS1B02G034300.1	B
Triticale.1670	Triticale.1670.1	561.0											1.0	Triticale.1670	1B	16506028.0	16506678.0	0.0	46.66024	13.537783	84.330507	229.962676	0.0	21.95187300000001	Yes	TraesCS1B02G034400.1	B
Triticale.1671	Triticale.1671.1	252.0									Triticale.1671.1	Triticale.1671.1	1.0	Triticale.1671	1B	16633297.0	16633648.0	25.9538	3.012586	1.352322	0.0	0.0	0.0	0.0	No		B
Triticale.1672	Triticale.1672.1	708.0											1.0	Triticale.1672	1B	16657896.0	16658695.0	0.0	3.060455	0.639817	4.826443	15.658129	0.0	3.4430400000000003	Yes		B
Triticale.1673	Triticale.1673.1	647.0											1.0	Triticale.1673	1B	16667979.0	16668716.0	0.0	14.092685	14.107667	23.068293	57.071993000000006	11.78471	25.101395	No		B
Triticale.1674	Triticale.1674.1	484.0											1.0	Triticale.1674	1B	16693069.0	16693803.0	0.0	0.0	2.250149	20.342028	1.748463	4.020281	40.204915	Yes	TraesCS1B02G035100.1	B
Triticale.1675	Triticale.1675.1	324.0									Triticale.1675.1	Triticale.1675.1	1.0	Triticale.1675	1B	16871261.0	16871584.0	1.865667	0.8445	1.841538	1.705151	0.0	14.413432	15.633629	No		B
Triticale.1676	Triticale.1676.1	2627.0											1.0	Triticale.1676	1B	17351710.0	17356948.0	0.0	0.951252	0.361755	5.910584	0.0	9.036515	5.5053220000000005	Yes	TraesCS1B02G036400.1	B
Triticale.1678	Triticale.1678.1	2588.0											2.0	Triticale.1678	1B	17681070.0	17687031.0	0.496878	0.0	0.641948	6.820604	15.350141	0.0	1.192682	Yes		B
Triticale.1678	Triticale.1678.2	910.0											2.0	Triticale.1678	1B	17681070.0	17687031.0	0.496878	0.0	0.641948	6.820604	15.350141	0.0	1.192682	Yes		B
Triticale.1677	Triticale.1677.1	959.0											1.0	Triticale.1677	1B	17690782.0	17691826.0	11.078546	0.0	0.228075	0.0	0.0	0.0	0.0	No		B
Triticale.1679	Triticale.1679.1	1073.0											1.0	Triticale.1679	1B	17692100.0	17697547.0	2.626933	188.737502	125.130313	4.832585	1.733423	41.346269	0.0	No		B
Triticale.1680	Triticale.1680.1	1213.0											1.0	Triticale.1680	1B	17730493.0	17732827.0	8.911933	0.435496	0.12594	0.0	0.0	9.719856	0.0	Yes		B
Triticale.1683	Triticale.1683.1	803.0											1.0	Triticale.1683	1B	17791304.0	17792555.0	1.877255	0.0	0.0	0.0	0.0	0.0	8.088649	Yes		B
Triticale.1684	Triticale.1684.1	1032.0											2.0	Triticale.1684	1B	17792651.0	17798282.0	21.837462	0.0	0.114236	0.418026	21.367518	0.0	0.0	Yes		B
Triticale.1684	Triticale.1684.2	758.0											2.0	Triticale.1684	1B	17792651.0	17798282.0	21.837462	0.0	0.114236	0.418026	21.367518	0.0	0.0	Yes	TraesCS1B02G037700.1	B
Triticale.1682	Triticale.1682.1	1059.0											1.0	Triticale.1682	1B	17811095.0	17816688.0	1.688466	0.790804	2.152367	1.645575	0.0	16.441387	3.049224	Yes		B
Triticale.1681	Triticale.1681.1	270.0											1.0	Triticale.1681	1B	17872691.0	17872960.0	0.0	12.122728	5.221358	13.123346	7.975749	0.0	4.514213	No		B
Triticale.1685	Triticale.1685.1	1379.0											1.0	Triticale.1685	1B	17884038.0	17886088.0	13.353832999999998	0.0	0.0	0.0	0.0	0.0	0.0	Yes	TraesCS1B02G038000.1	B
Triticale.1686	Triticale.1686.1	1179.0											1.0	Triticale.1686	1B	17889901.0	17892473.0	6.889639	0.0	0.193555	0.0	0.0	0.0	0.0	Yes	TraesCS1B02G038100.1	B
Triticale.1687	Triticale.1687.1	241.0											1.0	Triticale.1687	1B	19018530.0	19072729.0	0.0	8.675871	1.137214	0.0	0.0	0.0	0.0	Yes		B
Triticale.1688	Triticale.1688.1	241.0									Triticale.1688.1	Triticale.1688.1	1.0	Triticale.1688	1B	19025393.0	19026523.0	40.380465	0.78096	3.710496	0.0	0.0	0.0	0.0	Yes		B
Triticale.1689	Triticale.1689.1	585.0											1.0	Triticale.1689	1B	19314100.0	19314870.0	0.0	7.759339	9.612215	1.066812	4.736818	18.306283	6.620241	Yes	TraesCS1B02G039900.1	B
Triticale.1690	Triticale.1690.1	551.0											1.0	Triticale.1690	1B	20054128.0	20055299.0	24.237377	0.0	0.711361	2.296228	0.0	0.0	0.0	No		B
Triticale.1691	Triticale.1691.1	758.0											1.0	Triticale.1691	1B	20298790.0	20299621.0	10.911857	1.260279	2.06739	1.531937	0.0	0.0	0.0	No		B
Triticale.1692	Triticale.1692.1	1410.0											1.0	Triticale.1692	1B	20585218.0	20588374.0	13.375111	0.0	0.619688	1.643476	1.237396	0.0	0.0	Yes	TraesCS1B02G041200.1	B
Triticale.1695	Triticale.1695.1	1608.0											1.0	Triticale.1695	1B	20588925.0	20595873.0	6.570394	60.30960200000001	53.757183	43.82386500000001	15.06389	20.732756	49.912042	Yes		B
Triticale.1693	Triticale.1693.1	645.0											1.0	Triticale.1693	1B	20802462.0	20803720.0	15.470621	3.272333	3.4698260000000003	0.0	3.785333	0.0	4.859149	No		B
Triticale.1694	Triticale.1694.1	1491.0											1.0	Triticale.1694	1B	21486623.0	21488761.0	1.784714	11.043142	4.505637	0.0	0.846534	0.0	0.0	No		B
Triticale.1697	Triticale.1697.1	1078.0											1.0	Triticale.1697	1B	21843140.0	21844754.0	0.0	324.035853	266.039914	135.069156	272.677365	113.261755	79.507441	Yes		B
Triticale.1696	Triticale.1696.1	647.0											1.0	Triticale.1696	1B	22046328.0	22047298.0	0.0	0.0	0.0	0.0	0.0	18.334245000000006	0.0	Yes		B
Triticale.1698	Triticale.1698.1	647.0											1.0	Triticale.1698	1B	22069090.0	22069961.0	2315.697373	0.877584	0.955002	0.0	0.62059	0.0	6.148947	Yes	TraesCS1B02G042200.1	B
Triticale.1699	Triticale.1699.1	807.0											1.0	Triticale.1699	1B	22074081.0	22076121.0	14.438815	19.037106	33.269036	21.845794	3.719341000000001	18.914285	50.671267	Yes		B
Triticale.1701	Triticale.1701.1	1247.0											1.0	Triticale.1701	1B	22185724.0	22186970.0	0.0	249.73035	235.859938	108.698932	271.989164	187.998757	69.125685	Yes	TraesCS1B02G042700.1	B
Triticale.1700	Triticale.1700.1	1805.0									Triticale.1700.1	Triticale.1700.1	1.0	Triticale.1700	1B	22190361.0	22192165.0	0.0	0.0	0.0	0.558307	19.279299	0.0	0.0	No		B
Triticale.1703	Triticale.1703.1	985.0											1.0	Triticale.1703	1B	22325643.0	22329800.0	2.064981	12.583814	5.056082	3.945218	0.0	0.0	0.0	No		B
Triticale.1702	Triticale.1702.1	307.0									Triticale.1702.1	Triticale.1702.1	1.0	Triticale.1702	1B	22927874.0	22928180.0	8.074644000000001	1.496602	0.379071	0.0	0.0	0.0	5.27635	No		B
Triticale.1705	Triticale.1705.1	1816.0											1.0	Triticale.1705	1B	23813678.0	23818895.0	17.059144	17.898901000000006	21.130102	19.519097	6.370322	0.0	11.191903	Yes		B
Triticale.1704	Triticale.1704.1	582.0											1.0	Triticale.1704	1B	23839433.0	23840104.0	0.0	40.97776500000001	31.813993	66.122949	102.507324	65.900588	192.505167	Yes	TraesCS1B02G043800.1	B
Triticale.1706	Triticale.1706.1	654.0											1.0	Triticale.1706	1B	23979808.0	23981993.0	14.024876999999998	0.0	1.200393	1.188913	0.0	0.0	6.704352	Yes		B
Triticale.1707	Triticale.1707.1	290.0									Triticale.1707.1	Triticale.1707.1	1.0	Triticale.1707	1B	24109472.0	24109761.0	13.953187	0.790804	0.0	0.0	0.0	0.0	4.057334	No		B
Triticale.1708	Triticale.1708.1	256.0									Triticale.1708.1	Triticale.1708.1	1.0	Triticale.1708	1B	24501301.0	24501556.0	3.706846	5.770396	1.137214	1.705151	1.800545	14.413432	8.718345	Yes		B
Triticale.1709	Triticale.1709.1	1000.0									Triticale.1709.1	Triticale.1709.1	1.0	Triticale.1709	1B	24633972.0	24637958.0	1.374151	0.0	0.0	9.758579	0.0	0.0	0.0	No		B
Triticale.1710	Triticale.1710.1	888.0											1.0	Triticale.1710	1B	25484143.0	25485488.0	0.906917	0.0	0.275766	0.0	10.063182	0.0	0.0	No		B
Triticale.1711	Triticale.1711.1	648.0											1.0	Triticale.1711	1B	25812498.0	25814364.0	130.137542	15.294973	23.963398	22.29327	3.870616000000001	63.169978	26.593452000000006	Yes	TraesCS1B02G045700.1	B
Triticale.1712	Triticale.1712.1	2156.0											2.0	Triticale.1712	1B	26185377.0	26188979.0	2.831121	6.727034	0.966843	6.942400999999999	0.0	13.738220000000002	6.573414	Yes	TraesCS1B02G046300.1	B
Triticale.1712	Triticale.1712.2	2128.0											2.0	Triticale.1712	1B	26185377.0	26188979.0	2.831121	6.727034	0.966843	6.942400999999999	0.0	13.738220000000002	6.573414	Yes	TraesCS1B02G046300.2	B
Triticale.1714	Triticale.1714.1	656.0											1.0	Triticale.1714	1B	26967414.0	26968449.0	0.938628	0.0	1.463701	1.705151	0.0	14.413432	0.0	Yes		B
Triticale.1713	Triticale.1713.1	845.0											1.0	Triticale.1713	1B	27354337.0	27355181.0	0.0	0.0	0.0	10.806016	0.0	0.0	0.0	Yes	TraesCS1B02G047600.1	B
Triticale.1715	Triticale.1715.1	758.0											1.0	Triticale.1715	1B	28511862.0	28512917.0	7.781446000000001	45.24795200000001	49.691362	85.241801	38.486062	67.180284	45.586828	Yes	TraesCS1B02G048700.1	B
Triticale.1717	Triticale.1717.1	941.0											1.0	Triticale.1717	1B	28559022.0	28561553.0	43.238717	3.888468	6.588028	18.656996	5.638902	29.562093	36.115802	No		B
Triticale.1716	Triticale.1716.1	678.0											1.0	Triticale.1716	1B	28561982.0	28562746.0	2.766045	1.615432	0.51102	7.388986999999998	1.800545	0.0	14.716193	Yes		B
Triticale.1718	Triticale.1718.1	727.0											1.0	Triticale.1718	1B	28626101.0	28626916.0	105.85448999999998	0.742942	8964-01-01	0.0	0.0	0.0	0.0	Yes	TraesCS1B02G048900.1	B
Triticale.1719	Triticale.1719.1	798.0											1.0	Triticale.1719	1B	28762792.0	28763678.0	180.42118	0.745219	3.118551	0.792745	0.0	5.382465	2.413365	Yes	TraesCS1B02G049100.1	B
Triticale.1720	Triticale.1720.1	1160.0											1.0	Triticale.1720	1B	28764385.0	28767825.0	5.85914	5.147723	6.8928910000000005	9.869296	8.423757	0.0	9.124444	Yes		B
Triticale.1721	Triticale.1721.1	1046.0									Triticale.1721.1	Triticale.1721.1	1.0	Triticale.1721	1B	30221658.0	30223276.0	0.0	0.0	0.0	0.255936	7895-10-01	0.0	0.0	No		B
Triticale.1723	Triticale.1723.1	2297.0											1.0	Triticale.1723	1B	30393964.0	30397097.0	14.586119	0.0	0.730583	2.924813	0.0	0.0	2.570411	Yes	TraesCS1B02G050200.2	B
Triticale.1725	Triticale.1725.1	433.0									Triticale.1725.1	Triticale.1725.1	2.0	Triticale.1725	1B	30436188.0	30437236.0	2.588271	2.593604	9.453495	2.140043	0.0	0.0	10.418659	No		B
Triticale.1725	Triticale.1725.2	545.0									Triticale.1725.2	Triticale.1725.2	2.0	Triticale.1725	1B	30436188.0	30437236.0	2.588271	2.593604	9.453495	2.140043	0.0	0.0	10.418659	No		B
Triticale.1726	Triticale.1726.1	425.0									Triticale.1726.1	Triticale.1726.1	1.0	Triticale.1726	1B	30778400.0	30778824.0	0.0	0.0	0.0	0.0	0.0	0.0	9.77056	No		B
Triticale.1727	Triticale.1727.1	633.0											1.0	Triticale.1727	1B	30879281.0	30881506.0	2.808469	0.0	0.288047	0.0	0.0	0.0	8.043727	Yes		B
Triticale.1728	Triticale.1728.1	329.0									Triticale.1728.1	Triticale.1728.1	1.0	Triticale.1728	1B	31157151.0	31157479.0	0.0	2.362797	1.884987	6.748044999999999	0.0	0.0	0.0	No		B
Triticale.1729	Triticale.1729.1	565.0									Triticale.1729.1	Triticale.1729.1	1.0	Triticale.1729	1B	31629167.0	31630507.0	0.0	0.0	0.0	0.0	10.978545	0.0	0.0	No		B
Triticale.1730	Triticale.1730.1	1830.0											1.0	Triticale.1730	1B	31856848.0	31859510.0	2.105501	1.560865	0.779686	3.103748	17.299007999999994	0.0	8.136532	Yes		B
Triticale.1735	Triticale.1735.1	2374.0											2.0	Triticale.1735	1B	31891417.0	31966385.0	6.15717	1.7770860000000002	2.08646	8.862019	29.515937	0.0	8.529029	Yes		B
Triticale.1735	Triticale.1735.2	2302.0											2.0	Triticale.1735	1B	31891417.0	31966385.0	6.15717	1.7770860000000002	2.08646	8.862019	29.515937	0.0	8.529029	Yes		B
Triticale.1731	Triticale.1731.1	699.0											1.0	Triticale.1731	1B	32076191.0	32076889.0	0.8795440000000001	38.122622	50.452837	0.0	0.0	81.511156	0.0	No		B
Triticale.1733	Triticale.1733.1	1537.0											1.0	Triticale.1733	1B	32761008.0	32769476.0	6.652226	0.131715	1.818408	1.175966	2.03601	0.0	0.0	Yes	TraesCS1B02G052400.2	B
Triticale.1732	Triticale.1732.1	300.0											1.0	Triticale.1732	1B	33697373.0	33697672.0	0.0	0.0	0.0	0.0	0.0	0.0	9.796424	No		B
Triticale.1736	Triticale.1736.1	543.0									Triticale.1736.1	Triticale.1736.1	1.0	Triticale.1736	1B	33819853.0	33820488.0	0.0	8.094451	1.75783	6.77664	5.358529	0.0	13.341488	No		B
Triticale.1734	Triticale.1734.1	1990.0											1.0	Triticale.1734	1B	33966172.0	33968161.0	0.0	0.0	0.41374	5.333095	1.24319	0.0	0.0	No		B
Triticale.1737	Triticale.1737.1	847.0											1.0	Triticale.1737	1B	33981151.0	33982930.0	10.279468	0.30157	0.176333	0.0	0.0	0.0	2.074407	Yes	TraesCS1B02G053500.1	B
Triticale.1739	Triticale.1739.1	2182.0											1.0	Triticale.1739	1B	33983945.0	33990461.0	14.739724	19.663903	14.048574	23.675186	1.410234	10.489706	38.339382	Yes	TraesCS1B02G053600.1	B
Triticale.1738	Triticale.1738.1	1031.0											1.0	Triticale.1738	1B	34278910.0	34280623.0	1.75344	5.03936	2.337668	7.961780999999998	0.0	0.0	0.0	No		B
Triticale.1742	Triticale.1742.1	1199.0									Triticale.1742.1	Triticale.1742.1	1.0	Triticale.1742	1B	34727335.0	34729871.0	5.191497	4.265327	3.46141	7.035347	2.758633	16.721498	0.0	No		B
Triticale.1744	Triticale.1744.1	1111.0											1.0	Triticale.1744	1B	34729943.0	34731588.0	50.518613	7.058155	5.028923000000002	1.497955	0.0	5.565588	1.087566	Yes		B
Triticale.1740	Triticale.1740.1	2214.0											1.0	Triticale.1740	1B	36267647.0	36269969.0	3.196591	0.0	1.035512	0.0	0.0	0.0	9.754335	Yes	TraesCS1B02G054900.1	B
Triticale.1741	Triticale.1741.1	1358.0											1.0	Triticale.1741	1B	36519679.0	36521971.0	0.0	0.0	0.0	0.0	9.318286	0.0	0.0	No		B
Triticale.1747	Triticale.1747.1	1855.0											1.0	Triticale.1747	1B	37568862.0	37572364.0	8.17441	8.410229	9.326179	12.303744	12.930923	0.0	8.857439999999997	Yes	TraesCS1B02G055100.1	B
Triticale.1746	Triticale.1746.1	236.0											1.0	Triticale.1746	1B	37921252.0	37921572.0	10.078316	6.259412	3.724859	3.403077	0.0	0.0	0.0	No		B
Triticale.1748	Triticale.1748.1	1448.0											1.0	Triticale.1748	1B	38118149.0	38121141.0	1.648432	7.839225	5.29522	4.431273	0.631683	0.0	9.816633	Yes		B
Triticale.1749	Triticale.1749.1	734.0											1.0	Triticale.1749	1B	38833608.0	38834341.0	0.0	0.648588	0.0	0.0	1.780921	0.0	8.87778	Yes		B
Triticale.1750	Triticale.1750.1	1056.0											1.0	Triticale.1750	1B	38907522.0	38911587.0	10.804885	4.727599	3.599384	5.7419660000000015	7.364161	0.0	11.731885	Yes		B
Triticale.1751	Triticale.1751.1	509.0									Triticale.1751.1	Triticale.1751.1	1.0	Triticale.1751	1B	39545141.0	39546232.0	0.840892	2.258995	1.720344	6.281253	1.754559	0.0	11.796631	No		B
Triticale.1752	Triticale.1752.1	1331.0											1.0	Triticale.1752	1B	39572951.0	39579855.0	4.230524	1.6630049999999998	1.441667	2.496875	13.377604000000002	0.0	0.0	Yes		B
Triticale.1755	Triticale.1755.1	2524.0											1.0	Triticale.1755	1B	39847987.0	39853456.0	5.882042	1.7197790000000002	3.919725	17.514279000000002	4.025545	0.0	6.666515	Yes	TraesCS1B02G057800.3	B
Triticale.1753	Triticale.1753.1	767.0											1.0	Triticale.1753	1B	39854017.0	39854877.0	10.311444	0.0	0.0	0.0	0.0	0.0	0.0	Yes		B
Triticale.1756	Triticale.1756.1	1101.0											1.0	Triticale.1756	1B	40182582.0	40186827.0	2.786897	9.711587	0.319508	1.643201	0.0	0.0	0.0	Yes		B
Triticale.1754	Triticale.1754.1	1805.0											1.0	Triticale.1754	1B	40712081.0	40713885.0	5.537123	0.393868	0.5407810000000001	2.671561	1.10726	0.0	2.350239	No		B
Triticale.1757	Triticale.1757.1	994.0											1.0	Triticale.1757	1B	41091948.0	41094602.0	6.018927	5.718609	4.258642	6.827464999999999	3.5467480000000005	0.0	10.536775	Yes		B
Triticale.1758	Triticale.1758.1	613.0									Triticale.1758.1	Triticale.1758.1	1.0	Triticale.1758	1B	41366476.0	41368895.0	0.0	0.0	11.297936	2.628659	0.0	0.0	5.035342	Yes		B
Triticale.1759	Triticale.1759.1	742.0											1.0	Triticale.1759	1B	41525429.0	41526343.0	0.923447	0.0	0.0	1.705151	0.0	0.0	7.082539	Yes		B
Triticale.1760	Triticale.1760.1	1464.0											1.0	Triticale.1760	1B	41641595.0	41644296.0	19.954174	4.020459	6.125214	0.596337	5.805037	9.736936	22.035245	Yes	TraesCS1B02G059000.1	B
Triticale.1761	Triticale.1761.1	1634.0											1.0	Triticale.1761	1B	41739634.0	41745027.0	102.765945	1401.4464779999996	1734.595513	309.488021	254.30222200000003	552.967704	321.899319	Yes	TraesCS1B02G059100.2	B
Triticale.1762	Triticale.1762.1	1067.0											1.0	Triticale.1762	1B	42325539.0	42326605.0	5.864884	0.0	0.0	0.0	0.0	0.0	0.0	Yes		B
Triticale.1763	Triticale.1763.1	1346.0											1.0	Triticale.1763	1B	42347741.0	42351248.0	3.42885	2.287808	4.640105	15.935435	4.447854	0.0	10.313581	Yes		B
Triticale.1764	Triticale.1764.1	2107.0											1.0	Triticale.1764	1B	43317122.0	43325533.0	1.79395	5.055964	4.612546	8.784725	18.448965	0.0	3.0501150000000004	Yes		B
Triticale.1768	Triticale.1768.1	1662.0											1.0	Triticale.1768	1B	43449824.0	43455187.0	0.0	4.5216650000000005	2.012135	6.191688	8.78497	6.738409	3.060409	Yes		B
Triticale.1765	Triticale.1765.1	506.0									Triticale.1765.1	Triticale.1765.1	1.0	Triticale.1765	1B	44051311.0	44051816.0	0.0	0.0	0.0	5.105343	0.0	0.0	0.0	No		B
Triticale.1766	Triticale.1766.1	486.0											1.0	Triticale.1766	1B	44051895.0	44062207.0	0.0	0.0	0.0	5.080368	0.0	0.0	0.0	No		B
Triticale.1767	Triticale.1767.1	790.0									Triticale.1767.1	Triticale.1767.1	1.0	Triticale.1767	1B	44736475.0	44737463.0	7.522091	3.849912	4.365558999999998	3.052004	6.620992	0.0	2.898652	No		B
Triticale.1769	Triticale.1769.1	1362.0											1.0	Triticale.1769	1B	45197754.0	45201546.0	49.502616	17.258333	9.163676	17.467154999999998	8.594232	14.011297	48.595107	Yes	TraesCS1B02G060900.1	B
Triticale.1772	Triticale.1772.1	2232.0											1.0	Triticale.1772	1B	45737221.0	45741431.0	0.938628	0.0	0.964322	0.0	8.752925	0.0	0.0	Yes		B
Triticale.1770	Triticale.1770.1	963.0											1.0	Triticale.1770	1B	46001071.0	46004008.0	0.654018	33.796797999999995	65.180996	5.262418	0.994693	68.714508	28.37613	No		B
Triticale.1773	Triticale.1773.1	706.0											2.0	Triticale.1773	1B	46547868.0	46551722.0	52.535819	0.0	0.0	0.0	0.0	0.0	0.0	Yes	TraesCS1B02G061500.1	B
Triticale.1773	Triticale.1773.2	797.0											2.0	Triticale.1773	1B	46547868.0	46551722.0	52.535819	0.0	0.0	0.0	0.0	0.0	0.0	Yes		B
Triticale.1774	Triticale.1774.1	1760.0											1.0	Triticale.1774	1B	46692200.0	46694201.0	1.361543	7.6222699999999985	6815-02-01	0.0	0.0	0.0	0.0	Yes		B
Triticale.1775	Triticale.1775.1	472.0											1.0	Triticale.1775	1B	46884008.0	46884564.0	0.0	0.0	0.0	0.433512	0.0	0.0	7.445019	Yes	TraesCS1B02G061900.1	B
Triticale.1777	Triticale.1777.1	420.0									Triticale.1777.1	Triticale.1777.1	2.0	Triticale.1777	1B	46977034.0	46977598.0	223.77229900000003	69.11967299999999	71.677991	15.55066	12.668121	13.177999	4.627517	No		B
Triticale.1777	Triticale.1777.2	431.0									Triticale.1777.2	Triticale.1777.2	2.0	Triticale.1777	1B	46977034.0	46977598.0	223.77229900000003	69.11967299999999	71.677991	15.55066	12.668121	13.177999	4.627517	No		B
Triticale.1776	Triticale.1776.1	1794.0											1.0	Triticale.1776	1B	47160110.0	47164879.0	6.560975999999998	1.428648	4.229372	1.137718	1.083941	0.0	0.929392	Yes	TraesCS1B02G062000.1	B
Triticale.1778	Triticale.1778.1	1934.0											1.0	Triticale.1778	1B	49217414.0	49219429.0	6.968364	0.0	0.0	0.0	0.0	0.0	0.0	Yes	TraesCS1B02G064800.1	B
Triticale.1779	Triticale.1779.1	554.0									Triticale.1779.1	Triticale.1779.1	1.0	Triticale.1779	1B	49318571.0	49319273.0	5.321714	7.081548	2.64392	1.705151	0.0	28.618733	15.609996	No		B
Triticale.1783	Triticale.1783.1	827.0											2.0	Triticale.1783	1B	49617986.0	49619160.0	46.099891	226.462674	232.848004	487.24241	132.168849	149.88782700000004	83.184318	No		B
Triticale.1783	Triticale.1783.2	821.0											2.0	Triticale.1783	1B	49617986.0	49619160.0	46.099891	226.462674	232.848004	487.24241	132.168849	149.88782700000004	83.184318	No		B
Triticale.1780	Triticale.1780.1	825.0	Triticale.1780.1	LTR	Gypsy	reina	no	-	RNaseH|reina	Triticale.1780	Triticale.1780.1	Triticale.1780.1	1.0	Triticale.1780	1B	49651357.0	49652271.0	0.0	0.0	0.379071	8.323203	0.0	0.0	0.0	No		B
Triticale.1782	Triticale.1782.1	404.0									Triticale.1782.1	Triticale.1782.1	1.0	Triticale.1782	1B	50182795.0	50183198.0	6.333414	0.0	0.0	0.0	0.0	0.0	0.0	No		B
Triticale.1784	Triticale.1784.1	1432.0											1.0	Triticale.1784	1B	50183467.0	50187988.0	28.310899	90.201875	110.604941	100.347897	28.040473	22.123407	75.85121099999998	Yes		B
Triticale.1785	Triticale.1785.1	419.0									Triticale.1785.1	Triticale.1785.1	1.0	Triticale.1785	1B	50303173.0	50303666.0	9.413159	0.0	0.0	1.420282	0.0	0.0	7.467486	Yes		B
Triticale.1786	Triticale.1786.1	674.0											1.0	Triticale.1786	1B	50398339.0	50400265.0	15.905145	24.892718	15.724716	14.913746	11.650114	15.290215	12.916879	Yes	TraesCS1B02G066300.1	B
Triticale.1787	Triticale.1787.1	958.0											1.0	Triticale.1787	1B	50776457.0	50778701.0	2.101625	3.140102	6.663031	3.410302	0.748035	12.562862	14.804620000000002	Yes		B
Triticale.1788	Triticale.1788.1	903.0											1.0	Triticale.1788	1B	50867120.0	50869614.0	7.840608	11.549412	8.973875999999997	4.675474	5.507315	13.120532	8.034308	No		B
Triticale.1789	Triticale.1789.1	549.0											1.0	Triticale.1789	1B	50997697.0	50998245.0	0.0	0.0	0.0	6.497589	0.0	0.0	0.0	Yes		B
Triticale.1790	Triticale.1790.1	1296.0											1.0	Triticale.1790	1B	51105341.0	51113889.0	0.0	0.0	4.546809	6.6587710000000015	0.7363350000000001	0.0	0.0	Yes		B
Triticale.1791	Triticale.1791.1	398.0											1.0	Triticale.1791	1B	51299818.0	51300317.0	7.0491410000000005	0.0	0.339069	0.0	0.0	9.524453	0.0	Yes	TraesCS1B02G067000.1	B
Triticale.1792	Triticale.1792.1	732.0											1.0	Triticale.1792	1B	51589997.0	51590822.0	107.325407	0.0	7.430214	2.760387	1.75627	7.127961	5.9755400000000005	Yes	TraesCS1B02G067300.1	B
Triticale.1793	Triticale.1793.1	328.0									Triticale.1793.1	Triticale.1793.1	1.0	Triticale.1793	1B	51619337.0	51619664.0	0.0	0.0	0.0	1.237275	0.0	0.0	12.708284	No		B
Triticale.1795	Triticale.1795.1	1195.0											2.0	Triticale.1795	1B	52404497.0	52410010.0	3.231788	21.490127	9.146639	52.447611	56.794704	0.0	42.203897	Yes		B
Triticale.1795	Triticale.1795.2	2062.0											2.0	Triticale.1795	1B	52404497.0	52410010.0	3.231788	21.490127	9.146639	52.447611	56.794704	0.0	42.203897	Yes		B
Triticale.1794	Triticale.1794.1	597.0											1.0	Triticale.1794	1B	52901080.0	52901676.0	2.804878	23.573104	3.525301	0.411293	5.401635	0.0	6.283894999999999	Yes		B
Triticale.1798	Triticale.1798.1	988.0											2.0	Triticale.1798	1B	53050199.0	53052675.0	17.487167000000003	24.839881	33.14151	62.1172	11.887608	64.495725	203.673511	Yes	TraesCS1B02G068200.1	B
Triticale.1798	Triticale.1798.2	959.0											2.0	Triticale.1798	1B	53050199.0	53052675.0	17.487167000000003	24.839881	33.14151	62.1172	11.887608	64.495725	203.673511	Yes		B
Triticale.1796	Triticale.1796.1	335.0									Triticale.1796.1	Triticale.1796.1	1.0	Triticale.1796	1B	53057657.0	53057991.0	0.0	17.322144	13.138504	0.0	6.605583	9.207387	3.953326	No		B
Triticale.1799	Triticale.1799.1	353.0									Triticale.1799.1	Triticale.1799.1	1.0	Triticale.1799	1B	53058381.0	53058733.0	0.0	7.533917	3.521176	4.55995	0.0	12.943507	4.588778	No		B
Triticale.1800	Triticale.1800.1	364.0											1.0	Triticale.1800	1B	53063741.0	53066017.0	0.0	9.961085	9.33932	0.0	0.0	0.0	0.0	No		B
Triticale.1797	Triticale.1797.1	255.0											1.0	Triticale.1797	1B	53069641.0	53069895.0	2.642881	12.907157000000002	0.379071	0.0	0.0	0.0	0.0	No		B
Triticale.1801	Triticale.1801.1	1410.0											1.0	Triticale.1801	1B	53246153.0	53249027.0	83.649033	6.24062	5.02767	0.0	0.37671	3.731133	4.995695	Yes	TraesCS1B02G068500.2	B
Triticale.1802	Triticale.1802.1	633.0											1.0	Triticale.1802	1B	53250797.0	53252968.0	29.448887	0.0	1.957637	0.0	2.747751	18.64866	4.8178980000000005	Yes		B
Triticale.1803	Triticale.1803.1	1439.0											1.0	Triticale.1803	1B	54132281.0	54136442.0	9.827869	2.98571	0.0	0.0	0.0	6.730942999999999	2.148672	Yes	TraesCS1B02G069200.1	B
Triticale.1806	Triticale.1806.1	886.0											1.0	Triticale.1806	1B	54870749.0	54877899.0	0.985241	0.8479270000000001	4.079082	3.410302	0.0	11.696673	14.953629	Yes		B
Triticale.1804	Triticale.1804.1	872.0											1.0	Triticale.1804	1B	55427997.0	55428976.0	0.0	0.0	1.137214	0.0	0.0	14.413432	0.0	Yes	TraesCS1B02G070300.1	B
Triticale.1805	Triticale.1805.1	735.0											1.0	Triticale.1805	1B	55433006.0	55436931.0	14.34121	8.447075	12.888945	4.124842	2.403177	0.0	16.295663	No		B
Triticale.1807	Triticale.1807.1	696.0											1.0	Triticale.1807	1B	55461324.0	55462606.0	0.490891	0.682864	0.620348	1.563056	0.0	14.413432	0.0	Yes	TraesCS1B02G070400.1	B
Triticale.1808	Triticale.1808.1	1154.0											1.0	Triticale.1808	1B	56061834.0	56062987.0	6.277581	0.0	0.104787	0.0	0.0	0.0	0.0	Yes	TraesCS1B02G071200.1	B
Triticale.1809	Triticale.1809.1	878.0											1.0	Triticale.1809	1B	56892355.0	56894269.0	2.104964	12.696993	8.254518	19.040205	53.870752	0.0	4.230693	Yes		B
Triticale.1810	Triticale.1810.1	1411.0											1.0	Triticale.1810	1B	57498378.0	57501198.0	6.51518	5.561968	0.972798	1.300314	0.0	0.0	0.0	Yes	TraesCS1B02G073700.1	B
Triticale.1813	Triticale.1813.1	1203.0											1.0	Triticale.1813	1B	57771639.0	57774526.0	7.019031	0.0	0.502908	6.039607	0.0	0.0	6.859692999999999	Yes		B
Triticale.1811	Triticale.1811.1	1672.0											1.0	Triticale.1811	1B	57781832.0	57784202.0	0.0	2.203561	0.710759	10.861159	0.0	0.0	0.0	No		B
Triticale.1812	Triticale.1812.1	2182.0											1.0	Triticale.1812	1B	58321504.0	58325069.0	8.528521000000001	0.258044	0.372122	0.0	0.0	0.0	0.0	Yes	TraesCS1B02G075200.1	B
Triticale.1814	Triticale.1814.1	937.0											1.0	Triticale.1814	1B	59456192.0	59457128.0	11.386746	0.0	0.0	0.0	0.0	0.0	0.0	Yes		B
Triticale.1815	Triticale.1815.1	833.0											1.0	Triticale.1815	1B	59599574.0	59600491.0	0.0	0.0	0.56838	5.213709	0.0	0.0	7.404623	Yes		B
Triticale.1816	Triticale.1816.1	1102.0											1.0	Triticale.1816	1B	59601064.0	59602165.0	0.407136	1.535681	1.42341	10.713671	18.342033	0.0	18.524678	Yes		B
Triticale.1817	Triticale.1817.1	1680.0											1.0	Triticale.1817	1B	60107416.0	60109296.0	41.741555	1.238455	0.998673	0.0	0.0	5.507992	0.0	Yes	TraesCS1B02G077500.1	B
Triticale.1818	Triticale.1818.1	429.0									Triticale.1818.1	Triticale.1818.1	1.0	Triticale.1818	1B	60967189.0	60967617.0	18.48374500000001	5.509819	2.202856	3.004882	0.0	0.0	18.26429	No		B
Triticale.1819	Triticale.1819.1	1323.0											1.0	Triticale.1819	1B	61899373.0	61902035.0	9.521076	2.020943	2.095064	17.260304	0.609708	13.215041	8.506769	Yes	TraesCS1B02G079000.1	B
Triticale.1820	Triticale.1820.1	677.0											1.0	Triticale.1820	1B	62284381.0	62285233.0	16.143841000000002	0.0	0.0	0.0	0.0	0.0	0.0	Yes	TraesCS1B02G079800.1	B
Triticale.1821	Triticale.1821.1	1708.0									Triticale.1821.1	Triticale.1821.1	1.0	Triticale.1821	1B	62520799.0	62522990.0	0.5792229999999999	2.564556	15.079185999999998	8.453874	0.0	0.0	0.420129	No		B
Triticale.1823	Triticale.1823.1	714.0									Triticale.1823.1	Triticale.1823.1	2.0	Triticale.1823	1B	62679895.0	62680608.0	18.067797	2.66476	4.897966	5.697284	1.517946	9.66951	0.0	No		B
Triticale.1823	Triticale.1823.2	618.0											2.0	Triticale.1823	1B	62679895.0	62680608.0	18.067797	2.66476	4.897966	5.697284	1.517946	9.66951	0.0	No		B
Triticale.1824	Triticale.1824.1	833.0											1.0	Triticale.1824	1B	62681391.0	62682343.0	0.0	7.190333	10.018317	97.693069	20.808942	0.0	185.69837	Yes	TraesCS1B02G080300.1	B
Triticale.1822	Triticale.1822.1	1841.0											1.0	Triticale.1822	1B	62719857.0	62724509.0	9.947109	0.0	0.0	0.0	0.0	0.0	0.0	Yes	TraesCS1B02G080400.1	B
Triticale.1825	Triticale.1825.1	1508.0											1.0	Triticale.1825	1B	63050764.0	63054596.0	31.814997	2.98177	4.000863	6.06188	0.0	2.179224	2.946076	Yes	TraesCS1B02G080500.1	B
Triticale.1826	Triticale.1826.1	710.0											1.0	Triticale.1826	1B	63202088.0	63202961.0	26.753533	122.983348	73.625284	0.0	18.548152	73.00099	7.520656	Yes		B
Triticale.1827	Triticale.1827.1	631.0											1.0	Triticale.1827	1B	63468673.0	63469467.0	24.6929	132.139421	93.989892	3.177903	14.324464	105.873603	20.453174	Yes		B
Triticale.1828	Triticale.1828.1	622.0											1.0	Triticale.1828	1B	63479920.0	63480705.0	39.304658	464.715438	481.036139	5824-02-01	47.627604	300.179404	48.895305	Yes		B
Triticale.1829	Triticale.1829.1	626.0											1.0	Triticale.1829	1B	63614325.0	63615114.0	15.851713	223.024338	156.148971	14.703522	19.276762	91.86836	23.726716	Yes	TraesCS1B02G081000.1	B
Triticale.1830	Triticale.1830.1	595.0											1.0	Triticale.1830	1B	63808942.0	63809700.0	7.2566169999999985	49.605322	23.809509	0.0	0.662721	32.944983	0.0	Yes	TraesCS1B02G081200.1	B
Triticale.1831	Triticale.1831.1	593.0											1.0	Triticale.1831	1B	63889226.0	63889982.0	43.813178	189.758224	159.89846799999995	6.745841	24.800765	97.637019	2.70491	Yes	TraesCS1B02G081300.1	B
Triticale.1832	Triticale.1832.1	844.0											1.0	Triticale.1832	1B	63958728.0	63960624.0	4612-07-01	0.0	0.0	0.0	0.0	0.0	0.0	Yes		B
Triticale.1833	Triticale.1833.1	1889.0											1.0	Triticale.1833	1B	63962309.0	63964584.0	0.0	3.014181	1.278087	3.416621	13.265318	0.0	0.0	Yes		B
Triticale.1834	Triticale.1834.1	543.0											1.0	Triticale.1834	1B	64751098.0	64751752.0	0.938628	0.0	0.379071	0.0	0.0	14.413432	0.0	Yes	TraesCS1B02G081800.1	B
Triticale.1835	Triticale.1835.1	1623.0											1.0	Triticale.1835	1B	65348022.0	65353543.0	17.303599	0.529151	0.929811	0.0	0.0	3.197058	1.050067	Yes	TraesCS1B02G081900.1	B
Triticale.1836	Triticale.1836.1	2146.0											1.0	Triticale.1836	1B	65547236.0	65551172.0	2.572259	8.500587	2.8638790000000003	7.878974	0.0	0.0	0.0	Yes		B
Triticale.1837	Triticale.1837.1	1474.0	Triticale.1837.1	LTR	Copia	oryco	no	+	AP|oryco INT|oryco	Triticale.1837			1.0	Triticale.1837	1B	66388241.0	66389714.0	0.0	0.0	0.0	0.0	0.0	24.436345000000006	0.0	No		B
Triticale.1839	Triticale.1839.1	1580.0											1.0	Triticale.1839	1B	66492180.0	66500846.0	3.3416339999999995	0.0	0.0	0.0	0.0	14.413432	0.0	Yes		B
Triticale.1840	Triticale.1840.1	406.0											1.0	Triticale.1840	1B	66950262.0	66950861.0	3.662035	11.819204	11.125653	4.556869	7.339661	0.0	0.0	Yes		B
Triticale.1842	Triticale.1842.1	1349.0											1.0	Triticale.1842	1B	67505043.0	67506453.0	71.948699	46.428209	36.832311	68.257861	13.259166	0.0	75.179183	No		B
Triticale.1841	Triticale.1841.1	1030.0											1.0	Triticale.1841	1B	68081245.0	68084205.0	0.873926	0.156625	1.0584559999999998	4.304265	10.357505	0.0	0.0	Yes		B
Triticale.1844	Triticale.1844.1	2244.0											1.0	Triticale.1844	1B	68741629.0	68744217.0	0.0	44.567288	23.000209	7.223337	19.306113	36.065692	15.948965	Yes		B
Triticale.1843	Triticale.1843.1	2485.0											1.0	Triticale.1843	1B	68944253.0	68946737.0	6.875589	0.035324	0.0	0.0	0.0	0.0	0.0	Yes		B
Triticale.1845	Triticale.1845.1	827.0									Triticale.1845.1	Triticale.1845.1	1.0	Triticale.1845	1B	69563242.0	69564726.0	1.216698	0.218977	0.6009220000000001	3.734013	7.202181	5.716569	8.389845	Yes		B
Triticale.1846	Triticale.1846.1	817.0											1.0	Triticale.1846	1B	69836119.0	69846614.0	20.229322	165.61191100000005	173.34653799999995	366.0835990000001	227.800914	160.02968	170.871078	No		B
Triticale.1847	Triticale.1847.1	1931.0											1.0	Triticale.1847	1B	70232156.0	70234914.0	2.580619	7.532088000000001	11.867625	0.0	3.202938	0.0	10.336839	Yes		B
Triticale.1848	Triticale.1848.1	1642.0											1.0	Triticale.1848	1B	70710211.0	70712619.0	17.905379999999994	6.387594	1.199777	2.496457	0.0	0.0	3.155526	Yes	TraesCS1B02G086200.1	B
Triticale.1851	Triticale.1851.1	1100.0											1.0	Triticale.1851	1B	76952369.0	76953936.0	0.427503	2.469464	0.611683	0.0	19.383686	0.0	0.0	No		B
Triticale.1850	Triticale.1850.1	385.0									Triticale.1850.1	Triticale.1850.1	1.0	Triticale.1850	1B	77543621.0	77545299.0	0.0	6.0737830000000015	0.0	0.0	0.0	0.0	0.0	No		B
Triticale.1849	Triticale.1849.1	1207.0											1.0	Triticale.1849	1B	77613395.0	77614601.0	53.545324	0.0	0.0	0.0	0.0	0.0	0.0	No		B
Triticale.1853	Triticale.1853.1	393.0									Triticale.1853.1	Triticale.1853.1	1.0	Triticale.1853	1B	77723834.0	77724324.0	96.220086	30.209508000000003	49.40371500000001	32.805715	13.410167	196.543457	100.653421	No		B
Triticale.1852	Triticale.1852.1	869.0									Triticale.1852.1	Triticale.1852.1	1.0	Triticale.1852	1B	77945215.0	77946083.0	1.7217169999999995	0.0	0.312767	6.463483999999999	0.0	0.0	0.0	No		B
Triticale.1854	Triticale.1854.1	455.0											1.0	Triticale.1854	1B	79979956.0	79980410.0	28.507466	4.539733999999998	5.348656	5.051743	6.648167	0.0	7.781165	No		B
Triticale.1855	Triticale.1855.1	697.0									Triticale.1855.1	Triticale.1855.1	1.0	Triticale.1855	1B	80724568.0	80725264.0	0.0	1.388729	0.0	0.0	0.0	0.0	5.27635	Yes		B
Triticale.1856	Triticale.1856.1	975.0											1.0	Triticale.1856	1B	80735799.0	80736773.0	0.0	0.437983	0.8588399999999999	0.0	0.0	14.280381	3.030519	No		B
Triticale.1857	Triticale.1857.1	3081.0											1.0	Triticale.1857	1B	80919888.0	80923595.0	2.762569	1.75563	1.317584	9.558476	0.0	0.0	0.0	Yes		B
Triticale.1858	Triticale.1858.1	2355.0											1.0	Triticale.1858	1B	80952842.0	80957305.0	0.64568	0.0	0.0	8.089149	0.538251	0.0	0.0	No		B
Triticale.1861	Triticale.1861.1	941.0											3.0	Triticale.1861	1B	83202773.0	83204662.0	25.685927	15.328721	21.309463	22.389781	7.381749	0.0	23.400194	No		B
Triticale.1861	Triticale.1861.2	975.0											3.0	Triticale.1861	1B	83202773.0	83204662.0	25.685927	15.328721	21.309463	22.389781	7.381749	0.0	23.400194	No		B
Triticale.1861	Triticale.1861.3	979.0											3.0	Triticale.1861	1B	83202773.0	83204662.0	25.685927	15.328721	21.309463	22.389781	7.381749	0.0	23.400194	No		B
Triticale.1860	Triticale.1860.1	1275.0											1.0	Triticale.1860	1B	83206002.0	83212232.0	8.952667	16.155345	13.008543	7.380964	7.284086999999999	17.793526	0.0	Yes		B
Triticale.1859	Triticale.1859.1	296.0											1.0	Triticale.1859	1B	83627502.0	83627797.0	30.109019	0.0	0.0	0.0	0.0	0.0	0.0	No		B
Triticale.1862	Triticale.1862.1	587.0									Triticale.1862.1	Triticale.1862.1	1.0	Triticale.1862	1B	83970478.0	83975039.0	11.540164	0.0	0.364219	3.3289660000000003	0.0	30.030025	0.0	Yes		B
Triticale.1863	Triticale.1863.1	1356.0											1.0	Triticale.1863	1B	85432023.0	85437171.0	5.948103	0.0	0.0	0.0	0.0	0.0	0.0	Yes	TraesCS1B02G088600.1	B
Triticale.1864	Triticale.1864.1	1365.0											1.0	Triticale.1864	1B	85438412.0	85443914.0	7.46295	0.0	1.231635	1.108036	0.0	0.0	0.0	Yes	TraesCS1B02G088700.1	B
Triticale.1865	Triticale.1865.1	535.0											1.0	Triticale.1865	1B	87136796.0	87137427.0	0.550896	1.141123	0.940947	6.629372999999998	0.0	0.0	0.0	No		B
Triticale.1866	Triticale.1866.1	496.0									Triticale.1866.1	Triticale.1866.1	1.0	Triticale.1866	1B	87144837.0	87146720.0	0.669908	1.248386	1.118108	6.923738	0.0	0.0	0.0	No		B
Triticale.1867	Triticale.1867.1	1202.0											1.0	Triticale.1867	1B	89439287.0	89442854.0	4.770447	25.642567	44.982407	61.31734399999999	35.452165	38.096069	110.004426	No		B
Triticale.1868	Triticale.1868.1	2017.0											1.0	Triticale.1868	1B	90710058.0	90713907.0	2.197422	11.548009	8.962587	4.7553160000000005	19.254317	0.0	2.827828	Yes		B
Triticale.1869	Triticale.1869.1	1765.0											2.0	Triticale.1869	1B	90992432.0	91001469.0	31.586391	50.698698	47.171355	52.883487	35.360055	6.789403999999998	40.333431	Yes		B
[truncated: 42,327 more rows]

## Sheet: Table S2
Supplementary table S2. GO enrichment analysis of the genes that are specifically expressed during early stage (10 dpa) of seed development. The GO enrichment was performed by shinyGO.
Enrichment FDR	nGenes	Pathway Genes	Fold Enrichment	Pathway	URL	Genes
1.0938731854061e-23	43	602	8.75916273008633	Nucleosome	http://amigo.geneontology.org/amigo/term/GO:0000786	TRAESCS1A02G079900.1 TRAESCS1A02G229100.1 TRAESCS1A02G295700.1 TRAESCS1A02G306400.1 TRAESCS1B02G097900.1 TRAESCS1B02G245300.1 TRAESCS1B02G317200.1 TRAESCS1B02G375900.1 TRAESCS1B02G376100.1 TRAESCS1B02G376200.1 TRAESCS2A02G469400.1 TRAESCS2B02G315500.1 TRAESCS2B02G435100.1 TRAESCS2B02G436700.1 TRAESCS3A02G534100.1 TRAESCS4A02G030400.1 TRAESCS4A02G057500.1 TRAESCS4A02G100100.1 TRAESCS4B02G204200.1 …
1.0938731854061e-23	43	612	8.61603915606531	DNA packaging complex	http://amigo.geneontology.org/amigo/term/GO:0044815	TRAESCS1A02G079900.1 TRAESCS1A02G229100.1 TRAESCS1A02G295700.1 TRAESCS1A02G306400.1 TRAESCS1B02G097900.1 TRAESCS1B02G245300.1 TRAESCS1B02G317200.1 TRAESCS1B02G375900.1 TRAESCS1B02G376100.1 TRAESCS1B02G376200.1 TRAESCS2A02G469400.1 TRAESCS2B02G315500.1 TRAESCS2B02G435100.1 TRAESCS2B02G436700.1 TRAESCS3A02G534100.1 TRAESCS4A02G030400.1 TRAESCS4A02G057500.1 TRAESCS4A02G100100.1 TRAESCS4B02G204200.1 …
1.79425547516116e-23	43	626	8.42334818452392	Protein-DNA complex	http://amigo.geneontology.org/amigo/term/GO:0032993	TRAESCS1A02G079900.1 TRAESCS1A02G229100.1 TRAESCS1A02G295700.1 TRAESCS1A02G306400.1 TRAESCS1B02G097900.1 TRAESCS1B02G245300.1 TRAESCS1B02G317200.1 TRAESCS1B02G375900.1 TRAESCS1B02G376100.1 TRAESCS1B02G376200.1 TRAESCS2A02G469400.1 TRAESCS2B02G315500.1 TRAESCS2B02G435100.1 TRAESCS2B02G436700.1 TRAESCS3A02G534100.1 TRAESCS4A02G030400.1 TRAESCS4A02G057500.1 TRAESCS4A02G100100.1 TRAESCS4B02G204200.1 …
1.48680737515477e-22	43	669	7.88193716518979	Chromatin	http://amigo.geneontology.org/amigo/term/GO:0000785	TRAESCS1A02G079900.1 TRAESCS1A02G229100.1 TRAESCS1A02G295700.1 TRAESCS1A02G306400.1 TRAESCS1B02G097900.1 TRAESCS1B02G245300.1 TRAESCS1B02G317200.1 TRAESCS1B02G375900.1 TRAESCS1B02G376100.1 TRAESCS1B02G376200.1 TRAESCS2A02G469400.1 TRAESCS2B02G315500.1 TRAESCS2B02G435100.1 TRAESCS2B02G436700.1 TRAESCS3A02G534100.1 TRAESCS4A02G030400.1 TRAESCS4A02G057500.1 TRAESCS4A02G100100.1 TRAESCS4B02G204200.1 …
1.01883490397802e-22	44	696	7.75236241628331	Protein heterodimerization activity	http://amigo.geneontology.org/amigo/term/GO:0046982	TRAESCS1A02G079900.1 TRAESCS1A02G229100.1 TRAESCS1A02G295700.1 TRAESCS1A02G306400.1 TRAESCS1B02G097900.1 TRAESCS1B02G245300.1 TRAESCS1B02G317200.1 TRAESCS1B02G375900.1 TRAESCS1B02G376100.1 TRAESCS1B02G376200.1 TRAESCS2A02G469400.1 TRAESCS2B02G315500.1 TRAESCS2B02G435100.1 TRAESCS2B02G436700.1 TRAESCS3A02G534100.1 TRAESCS3B02G017400.1 TRAESCS4A02G030400.1 TRAESCS4A02G057500.1 TRAESCS4A02G100100.1 …
0.000248121037660276	12	258	5.70364084749808	Chromatin assembly	http://amigo.geneontology.org/amigo/term/GO:0031497	TRAESCS1A02G079900.1 TRAESCS1A02G295700.1 TRAESCS1B02G097900.1 TRAESCS1B02G245300.1 TRAESCS1B02G376100.1 TRAESCS1B02G376200.1 TRAESCS2A02G469400.1 TRAESCS2B02G435100.1 TRAESCS2B02G436700.1 TRAESCS5A02G204700.1 TRAESCS5B02G301800.1 TRAESCS7A02G498700.1
0.000248121037660276	12	258	5.70364084749808	Nucleosome assembly	http://amigo.geneontology.org/amigo/term/GO:0006334	TRAESCS1A02G079900.1 TRAESCS1A02G295700.1 TRAESCS1B02G097900.1 TRAESCS1B02G245300.1 TRAESCS1B02G376100.1 TRAESCS1B02G376200.1 TRAESCS2A02G469400.1 TRAESCS2B02G435100.1 TRAESCS2B02G436700.1 TRAESCS5A02G204700.1 TRAESCS5B02G301800.1 TRAESCS7A02G498700.1
7.72051047795542e-18	45	984	5.60800052840893	Chromosome	http://amigo.geneontology.org/amigo/term/GO:0005694	TRAESCS1A02G079900.1 TRAESCS1A02G229100.1 TRAESCS1A02G295700.1 TRAESCS1A02G306400.1 TRAESCS1B02G097900.1 TRAESCS1B02G161100.1 TRAESCS1B02G245300.1 TRAESCS1B02G317200.1 TRAESCS1B02G375900.1 TRAESCS1B02G376100.1 TRAESCS1B02G376200.1 TRAESCS2A02G469400.1 TRAESCS2B02G315500.1 TRAESCS2B02G435100.1 TRAESCS2B02G436700.1 TRAESCS3A02G534100.1 TRAESCS4A02G030400.1 TRAESCS4A02G057500.1 TRAESCS4A02G100100.1 …
0.000312287359900132	12	267	5.51138329084084	Chromatin assembly or disassembly	http://amigo.geneontology.org/amigo/term/GO:0006333	TRAESCS1A02G079900.1 TRAESCS1A02G295700.1 TRAESCS1B02G097900.1 TRAESCS1B02G245300.1 TRAESCS1B02G376100.1 TRAESCS1B02G376200.1 TRAESCS2A02G469400.1 TRAESCS2B02G435100.1 TRAESCS2B02G436700.1 TRAESCS5A02G204700.1 TRAESCS5B02G301800.1 TRAESCS7A02G498700.1
0.000312287359900132	12	269	5.47040646339964	Nucleosome organization	http://amigo.geneontology.org/amigo/term/GO:0034728	TRAESCS1A02G079900.1 TRAESCS1A02G295700.1 TRAESCS1B02G097900.1 TRAESCS1B02G245300.1 TRAESCS1B02G376100.1 TRAESCS1B02G376200.1 TRAESCS2A02G469400.1 TRAESCS2B02G435100.1 TRAESCS2B02G436700.1 TRAESCS5A02G204700.1 TRAESCS5B02G301800.1 TRAESCS7A02G498700.1
0.000447182929771724	12	281	5.23679479948222	DNA packaging	http://amigo.geneontology.org/amigo/term/GO:0006323	TRAESCS1A02G079900.1 TRAESCS1A02G295700.1 TRAESCS1B02G097900.1 TRAESCS1B02G245300.1 TRAESCS1B02G376100.1 TRAESCS1B02G376200.1 TRAESCS2A02G469400.1 TRAESCS2B02G435100.1 TRAESCS2B02G436700.1 TRAESCS5A02G204700.1 TRAESCS5B02G301800.1 TRAESCS7A02G498700.1
0.000941670677057507	12	306	4.80895208710622	Chromatin remodeling	http://amigo.geneontology.org/amigo/term/GO:0006338	TRAESCS1A02G079900.1 TRAESCS1A02G295700.1 TRAESCS1B02G097900.1 TRAESCS1B02G245300.1 TRAESCS1B02G376100.1 TRAESCS1B02G376200.1 TRAESCS2A02G469400.1 TRAESCS2B02G435100.1 TRAESCS2B02G436700.1 TRAESCS5A02G204700.1 TRAESCS5B02G301800.1 TRAESCS7A02G498700.1
0.00279340200509567	12	346	4.25300386894365	Protein-DNA complex assembly	http://amigo.geneontology.org/amigo/term/GO:0065004	TRAESCS1A02G079900.1 TRAESCS1A02G295700.1 TRAESCS1B02G097900.1 TRAESCS1B02G245300.1 TRAESCS1B02G376100.1 TRAESCS1B02G376200.1 TRAESCS2A02G469400.1 TRAESCS2B02G435100.1 TRAESCS2B02G436700.1 TRAESCS5A02G204700.1 TRAESCS5B02G301800.1 TRAESCS7A02G498700.1
0.00279340200509567	12	348	4.22856131797271	Chromatin organization	http://amigo.geneontology.org/amigo/term/GO:0006325	TRAESCS1A02G079900.1 TRAESCS1A02G295700.1 TRAESCS1B02G097900.1 TRAESCS1B02G245300.1 TRAESCS1B02G376100.1 TRAESCS1B02G376200.1 TRAESCS2A02G469400.1 TRAESCS2B02G435100.1 TRAESCS2B02G436700.1 TRAESCS5A02G204700.1 TRAESCS5B02G301800.1 TRAESCS7A02G498700.1
0.00285557355566983	12	351	4.19241976824645	Enzyme inhibitor activity	http://amigo.geneontology.org/amigo/term/GO:0004857	TRAESCS1A02G293000.1 TRAESCS2A02G313100.1 TRAESCS2A02G467500.1 TRAESCS2B02G049000.1 TRAESCS2B02G206700.1 TRAESCS2B02G490400.1 TRAESCS4A02G369900.1 TRAESCS5A02G058800.1 TRAESCS5A02G058900.1 TRAESCS5B02G502800.1 TRAESCS6A02G241600.1 TRAESCS6B02G435500.1
0.00308758191640562	12	357	4.12195893180533	Molecular function inhibitor activity	http://amigo.geneontology.org/amigo/term/GO:0140678	TRAESCS1A02G293000.1 TRAESCS2A02G313100.1 TRAESCS2A02G467500.1 TRAESCS2B02G049000.1 TRAESCS2B02G206700.1 TRAESCS2B02G490400.1 TRAESCS4A02G369900.1 TRAESCS5A02G058800.1 TRAESCS5A02G058900.1 TRAESCS5B02G502800.1 TRAESCS6A02G241600.1 TRAESCS6B02G435500.1
0.00308758191640562	12	358	4.11044508004051	Protein-DNA complex subunit organization	http://amigo.geneontology.org/amigo/term/GO:0071824	TRAESCS1A02G079900.1 TRAESCS1A02G295700.1 TRAESCS1B02G097900.1 TRAESCS1B02G245300.1 TRAESCS1B02G376100.1 TRAESCS1B02G376200.1 TRAESCS2A02G469400.1 TRAESCS2B02G435100.1 TRAESCS2B02G436700.1 TRAESCS5A02G204700.1 TRAESCS5B02G301800.1 TRAESCS7A02G498700.1
0.0031061094785737	12	362	4.06502579738813	DNA conformation change	http://amigo.geneontology.org/amigo/term/GO:0071103	TRAESCS1A02G079900.1 TRAESCS1A02G295700.1 TRAESCS1B02G097900.1 TRAESCS1B02G245300.1 TRAESCS1B02G376100.1 TRAESCS1B02G376200.1 TRAESCS2A02G469400.1 TRAESCS2B02G435100.1 TRAESCS2B02G436700.1 TRAESCS5A02G204700.1 TRAESCS5B02G301800.1 TRAESCS7A02G498700.1
6.51324241823151e-11	50	1847	3.31966102385513	Protein dimerization activity	http://amigo.geneontology.org/amigo/term/GO:0046983	TRAESCS1A02G079900.1 TRAESCS1A02G229100.1 TRAESCS1A02G295700.1 TRAESCS1A02G306400.1 TRAESCS1B02G097900.1 TRAESCS1B02G245300.1 TRAESCS1B02G317200.1 TRAESCS1B02G375900.1 TRAESCS1B02G376100.1 TRAESCS1B02G376200.1 TRAESCS2A02G051600.2 TRAESCS2A02G469400.1 TRAESCS2B02G315500.1 TRAESCS2B02G435100.1 TRAESCS2B02G436700.1 TRAESCS3A02G169100.1 TRAESCS3A02G534100.1 TRAESCS3B02G017400.1 TRAESCS4A02G030400.1 …
0.000941670677057507	24	1063	2.76865350640546	Thylakoid	http://amigo.geneontology.org/amigo/term/GO:0009579	TRAESCS1A02G079900.1 TRAESCS1A02G295700.1 TRAESCS1B02G097900.1 TRAESCS1B02G214700.1 TRAESCS1B02G376200.1 TRAESCS2A02G469400.1 TRAESCS2B02G435100.1 TRAESCS2B02G623400.1 TRAESCS3A02G435700.1 TRAESCS3B02G470400.1 TRAESCS4A02G016700.1 TRAESCS4B02G193400.1 TRAESCS5A02G173800.1 TRAESCS5B02G171200.1 TRAESCS5B02G270200.1 TRAESCS5B02G301800.1 TRAESCS5B02G466700.1 TRAESCS5B02G516600.2 TRAESCS6A02G302500.1 …

## Sheet: Table S3
Supplementary table S3. GO enrichment analysis of the genes that are specifically expressed during middle stage (15 dpa) of seed development. The GO enrichment was performed by shinyGO.
Enrichment FDR	nGenes	Pathway Genes	Fold Enrichment	Pathway	URL	Genes
0.0454312482490795	1	7	189.673721340388	Intrinsic component of thylakoid membrane	http://amigo.geneontology.org/amigo/term/GO:0031360	TRAESCS6B02G329700.1
1.869061322578e-05	4	104	51.0660018993352	Cysteine-type endopeptidase inhibitor activity	http://amigo.geneontology.org/amigo/term/GO:0004869	TRAESCS2A02G581500.1 TRAESCS2B02G501700.1 TRAESCS2B02G502800.1 TRAESCS5A02G557600.1
1.869061322578e-05	6	452	17.6245493280892	Endopeptidase inhibitor activity	http://amigo.geneontology.org/amigo/term/GO:0004866	TRAESCS2A02G581500.1 TRAESCS2B02G501700.1 TRAESCS2B02G502800.1 TRAESCS3A02G045600.1 TRAESCS3B02G009700.1 TRAESCS5A02G557600.1
1.869061322578e-05	6	452	17.6245493280892	Peptidase inhibitor activity	http://amigo.geneontology.org/amigo/term/GO:0030414	TRAESCS2A02G581500.1 TRAESCS2B02G501700.1 TRAESCS2B02G502800.1 TRAESCS3A02G045600.1 TRAESCS3B02G009700.1 TRAESCS5A02G557600.1
1.869061322578e-05	6	452	17.6245493280892	Endopeptidase regulator activity	http://amigo.geneontology.org/amigo/term/GO:0061135	TRAESCS2A02G581500.1 TRAESCS2B02G501700.1 TRAESCS2B02G502800.1 TRAESCS3A02G045600.1 TRAESCS3B02G009700.1 TRAESCS5A02G557600.1
1.869061322578e-05	6	455	17.5083435083435	Peptidase regulator activity	http://amigo.geneontology.org/amigo/term/GO:0061134	TRAESCS2A02G581500.1 TRAESCS2B02G501700.1 TRAESCS2B02G502800.1 TRAESCS3A02G045600.1 TRAESCS3B02G009700.1 TRAESCS5A02G557600.1
0.00171394360190254	4	351	15.1306672294327	Enzyme inhibitor activity	http://amigo.geneontology.org/amigo/term/GO:0004857	TRAESCS4A02G449400.1 TRAESCS4A02G460300.1 TRAESCS5A02G293400.1 TRAESCS5A02G327500.1
0.00171394360190254	4	357	14.8763703012069	Molecular function inhibitor activity	http://amigo.geneontology.org/amigo/term/GO:0140678	TRAESCS4A02G449400.1 TRAESCS4A02G460300.1 TRAESCS5A02G293400.1 TRAESCS5A02G327500.1
2.12881710627072e-06	10	1197	11.092030487742	Enzyme regulator activity	http://amigo.geneontology.org/amigo/term/GO:0030234	TRAESCS2A02G581500.1 TRAESCS2B02G501700.1 TRAESCS2B02G502800.1 TRAESCS3A02G045600.1 TRAESCS3B02G009700.1 TRAESCS4A02G449400.1 TRAESCS4A02G460300.1 TRAESCS5A02G293400.1 TRAESCS5A02G327500.1 TRAESCS5A02G557600.1
2.12881710627072e-06	10	1270	10.4544570817537	Molecular function regulator	http://amigo.geneontology.org/amigo/term/GO:0098772	TRAESCS2A02G581500.1 TRAESCS2B02G501700.1 TRAESCS2B02G502800.1 TRAESCS3A02G045600.1 TRAESCS3B02G009700.1 TRAESCS4A02G449400.1 TRAESCS4A02G460300.1 TRAESCS5A02G293400.1 TRAESCS5A02G327500.1 TRAESCS5A02G557600.1

## Sheet: Table S4
Supplementary table S4. GO enrichment analysis of the genes that are specifically expressed during late stage (20 dpa) of seed development. The GO enrichment was performed by shinyGO.
Enrichment FDR	nGenes	Pathway Genes	Fold Enrichment	Pathway	URL	Genes
0.000777855523522822	3	148	44.4891064533922	Neg. reg. of peptidase activity	http://amigo.geneontology.org/amigo/term/GO:0010466	TRAESCS3B02G038300.1 TRAESCS3B02G038600.1 TRAESCS5B02G478100.1
0.000777855523522822	3	148	44.4891064533922	Reg. of peptidase activity	http://amigo.geneontology.org/amigo/term/GO:0052547	TRAESCS3B02G038300.1 TRAESCS3B02G038600.1 TRAESCS5B02G478100.1
0.000777855523522822	3	149	44.1905218463224	Neg. reg. of proteolysis	http://amigo.geneontology.org/amigo/term/GO:0045861	TRAESCS3B02G038300.1 TRAESCS3B02G038600.1 TRAESCS5B02G478100.1
0.00101087519265278	3	187	35.210629706428	Reg. of proteolysis	http://amigo.geneontology.org/amigo/term/GO:0030162	TRAESCS3B02G038300.1 TRAESCS3B02G038600.1 TRAESCS5B02G478100.1
0.0016459361149377	3	238	27.6654947693363	Neg. reg. of molecular function	http://amigo.geneontology.org/amigo/term/GO:0044092	TRAESCS3B02G038300.1 TRAESCS3B02G038600.1 TRAESCS5B02G478100.1
0.000777855523522822	4	332	26.4433243176789	Serine-type endopeptidase inhibitor activity	http://amigo.geneontology.org/amigo/term/GO:0004867	TRAESCS1A02G265700.1 TRAESCS3B02G038300.1 TRAESCS3B02G038600.1 TRAESCS5B02G478100.1
0.00367378963367321	3	327	20.1357423703426	Neg. reg. of cellular protein metabolic proc.	http://amigo.geneontology.org/amigo/term/GO:0032269	TRAESCS3B02G038300.1 TRAESCS3B02G038600.1 TRAESCS5B02G478100.1
0.000777855523522822	4	452	19.4229727289146	Endopeptidase inhibitor activity	http://amigo.geneontology.org/amigo/term/GO:0004866	TRAESCS1A02G265700.1 TRAESCS3B02G038300.1 TRAESCS3B02G038600.1 TRAESCS5B02G478100.1
0.000777855523522822	4	452	19.4229727289146	Peptidase inhibitor activity	http://amigo.geneontology.org/amigo/term/GO:0030414	TRAESCS1A02G265700.1 TRAESCS3B02G038300.1 TRAESCS3B02G038600.1 TRAESCS5B02G478100.1
0.000777855523522822	4	452	19.4229727289146	Endopeptidase regulator activity	http://amigo.geneontology.org/amigo/term/GO:0061135	TRAESCS1A02G265700.1 TRAESCS3B02G038300.1 TRAESCS3B02G038600.1 TRAESCS5B02G478100.1
0.000777855523522822	4	455	19.2949091724602	Peptidase regulator activity	http://amigo.geneontology.org/amigo/term/GO:0061134	TRAESCS1A02G265700.1 TRAESCS3B02G038300.1 TRAESCS3B02G038600.1 TRAESCS5B02G478100.1
0.00935113426282666	3	470	14.0093356491533	Reg. of molecular function	http://amigo.geneontology.org/amigo/term/GO:0065009	TRAESCS3B02G038300.1 TRAESCS3B02G038600.1 TRAESCS5B02G478100.1
